# Supplementary material for: Generation of Novel Immunocompetent Mouse Cell Lines to Model Experimental Metastasis of High-Risk Neuroblastoma
Source: MDPI journal article supplement (doi:10.3390/cancers15194693), 2023-09-23

These western blots correspond to Figure 1B iv).

N-myc expression for all the derived lines (above, gel1).

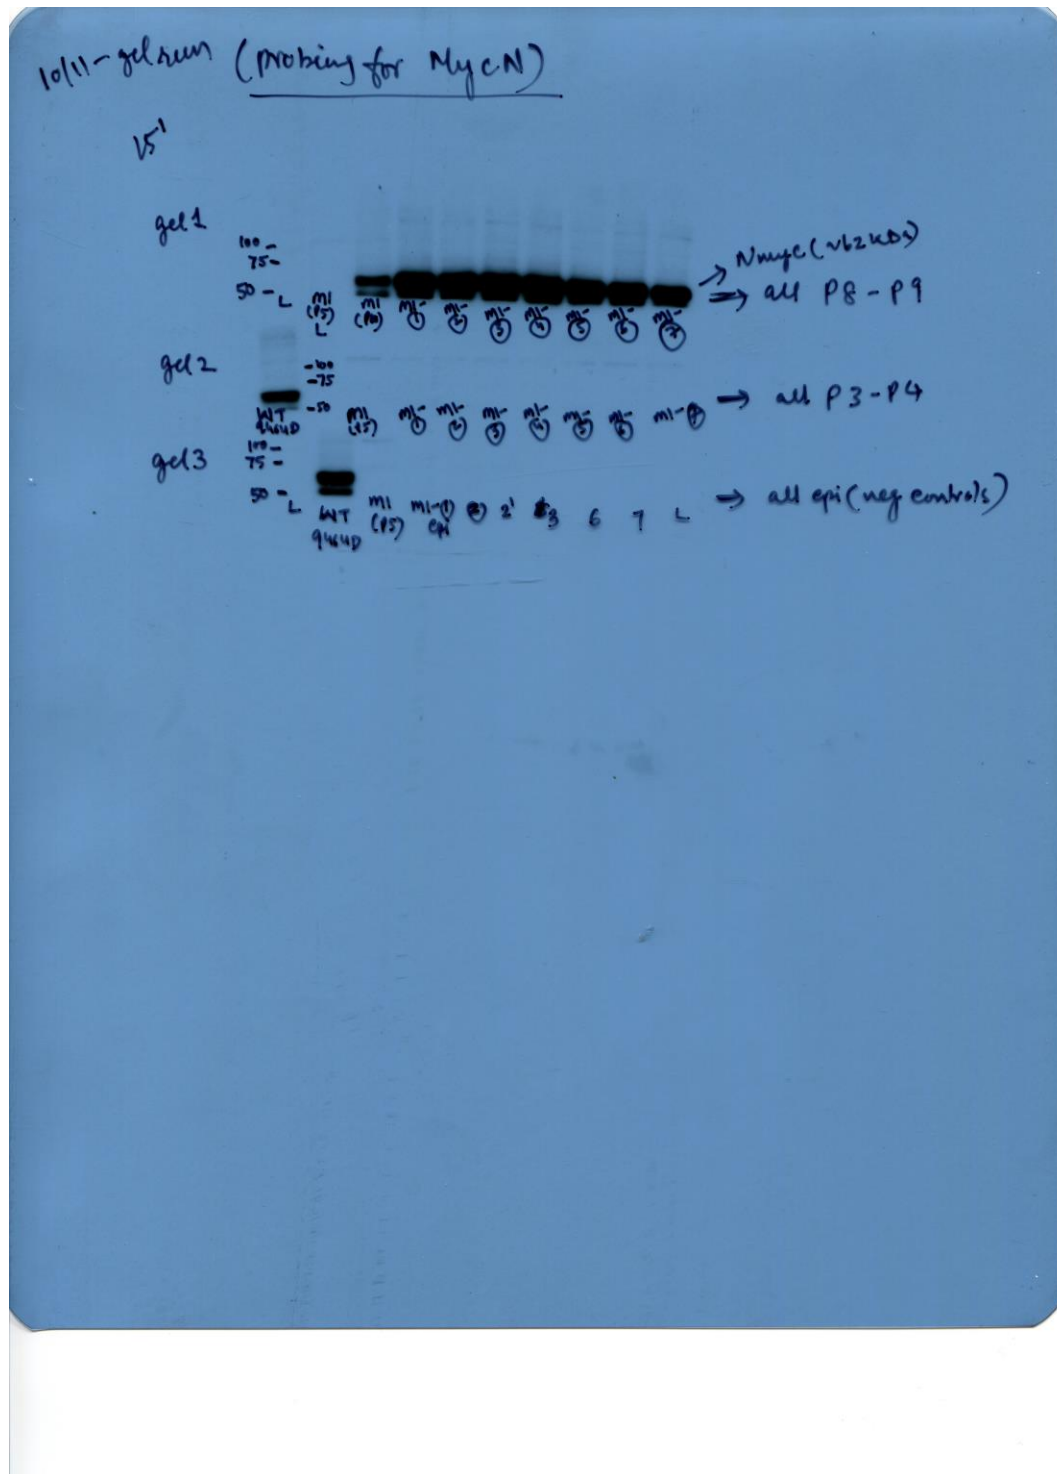

B-actin expression for all the derived lines (above, gel1).

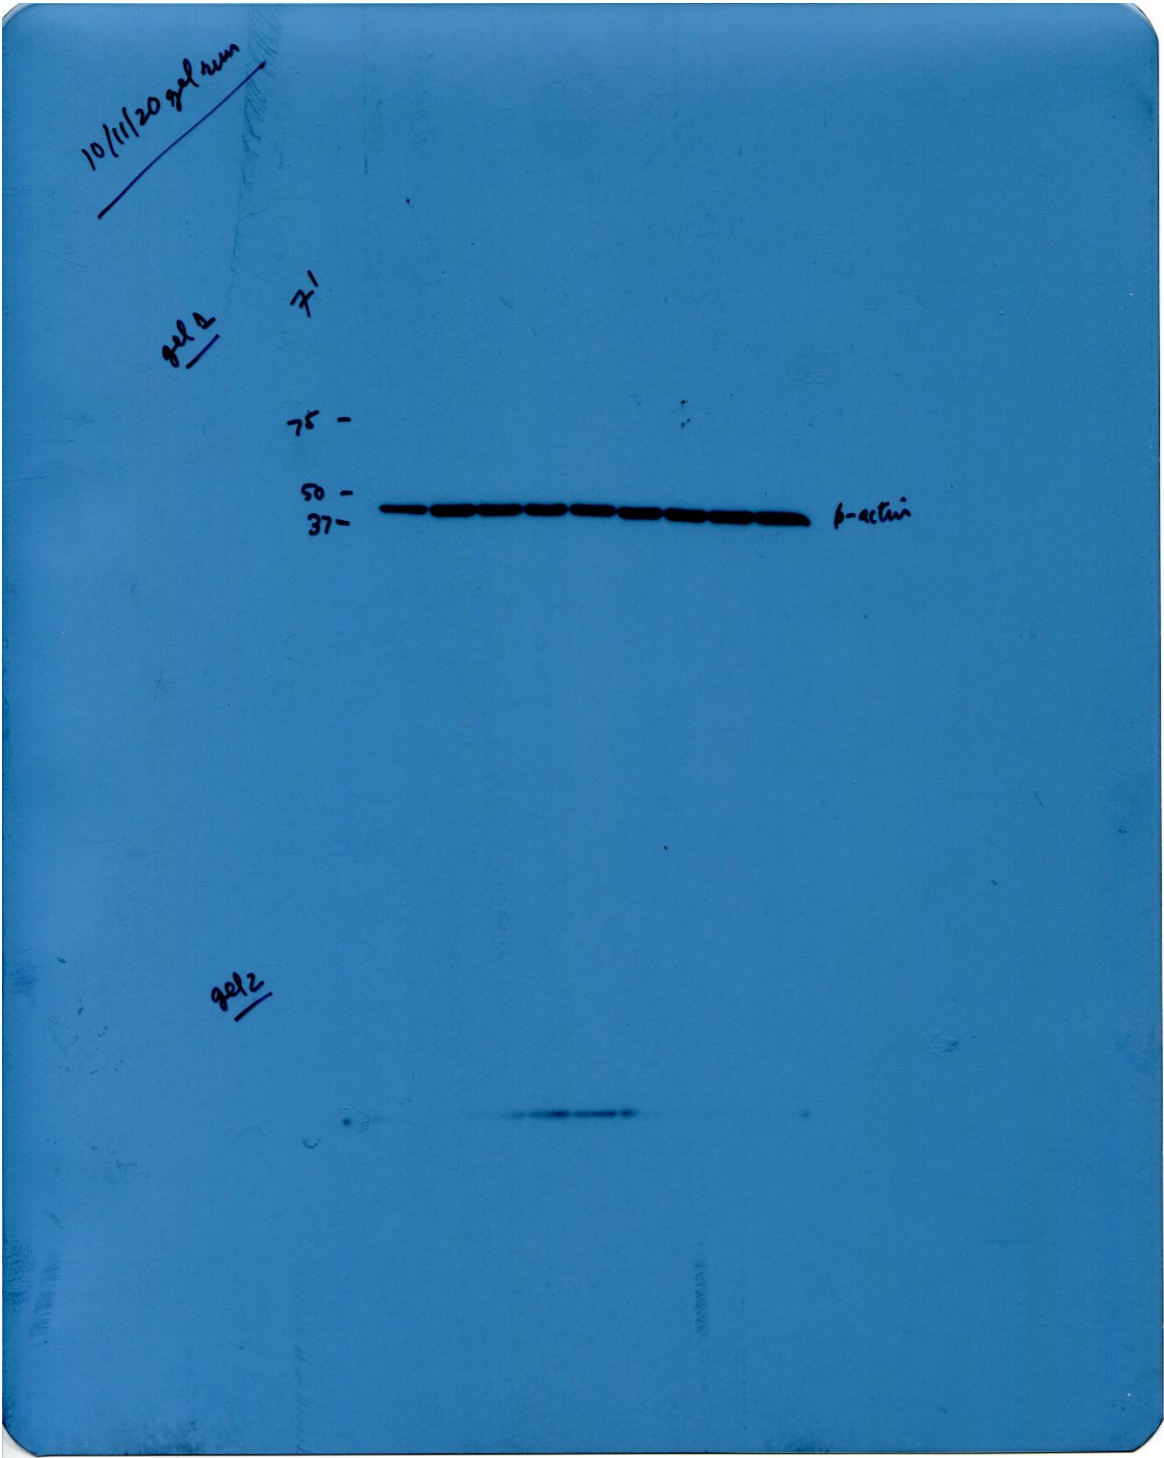

These western blots correspond to Figure 1B iv) for left out non-NB/tissue cells

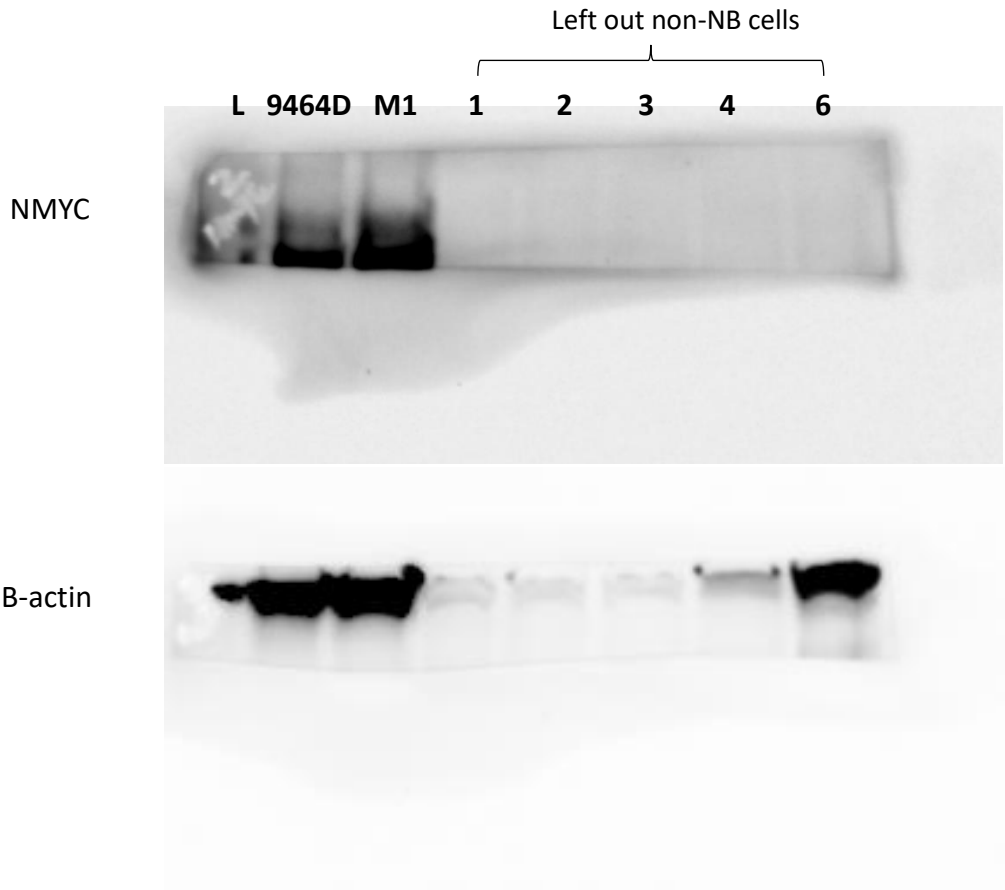

This western blot corresponds to Supplementary Figure S1A.

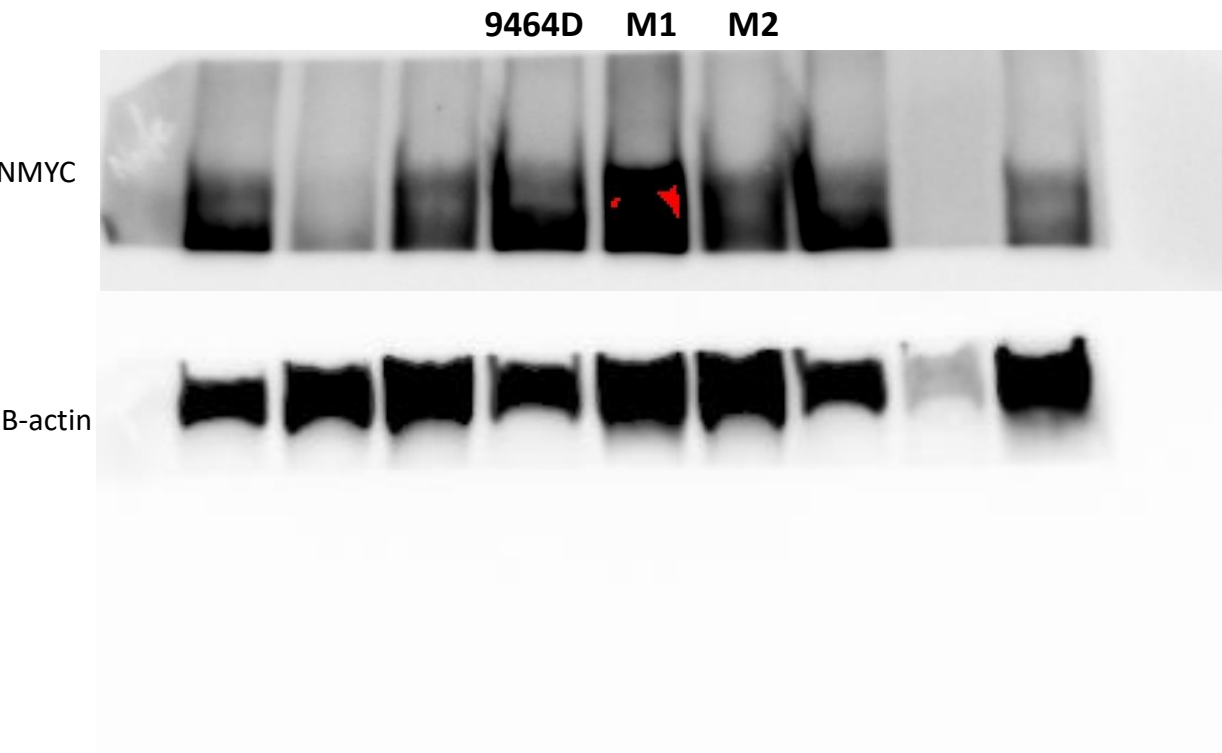

Supplement: s1 [file s1]
