# Supplementary material for: Generation of Novel Immunocompetent Mouse Cell Lines to Model Experimental Metastasis of High-Risk Neuroblastoma
Source: Cancers (Basel). 2023 Sep 23;15(19):4693. doi: 10.3390/cancers15194693 (PMC10571844; doi:10.3390/cancers15194693)
Supplement: Supplementary file 1 [file cancers-15-04693-s001.zip]

Archive with 4 entries (4 files):
- cancers-2610055-File S1.pdf
- cancers-2610055-supplementary.pdf
- Table S1 RNA-seq DEGs_Dhamdhere.M.xlsx
- Table S2 enriched GO terms_Dhamdhere.M.xlsx
