# Supplementary material for: Generation of Novel Immunocompetent Mouse Cell Lines to Model Experimental Metastasis of High-Risk Neuroblastoma
Source: Cancers (Basel). 2023 Sep 23;15(19):4693. doi: 10.3390/cancers15194693 (PMC10571844; doi:10.3390/cancers15194693)
Supplement: Supplementary file 1 [file cancers-15-04693-s001.zip › Table S1 RNA-seq DEGs_Dhamdhere.M.xlsx]

## Sheet: logFC
gene_id	gene_name	width	logFC	unshrunk.logFC	logCPM	PValue	FDR
ENSMUSG00000002944	Cd36	107112	9.71547	9.88247	5.0548	1.01283e-09	9.63765e-06		1092 significantly differentially regulated genes (up or down), p-valules (<0.05).
ENSMUSG00000024087	Cyp1b1	13525	-5.61822	-5.62531	5.4297	1.44319e-09	9.63765e-06
ENSMUSG00000024529	Lox	13801	-10.7881	-10.9606	6.07622	2.21451e-09	9.859e-06		And the bold ones, 686 are significant with FDR<0.05 (5%).
ENSMUSG00000054932	Afp	18171	6.09522	6.12118	4.05723	3.11292e-09	1.0394e-05				(308 upreg and 378 downregltd)
ENSMUSG00000032021	Crtam	34938	9.81251	10.2648	3.8596	6.36438e-09	1.70005e-05
ENSMUSG00000034842	Art3	82802	5.95231	5.96602	4.82273	9.63441e-09	1.85066e-05
ENSMUSG00000026748	Plxdc2	399536	-8.20455	-8.29318	4.41873	1.07446e-08	1.85066e-05
ENSMUSG00000021340	Gpld1	49350	4.17357	4.18074	3.97694	1.17672e-08	1.85066e-05
ENSMUSG00000000184	Ccnd2	27032	9.64896	9.81595	4.9876	1.24708e-08	1.85066e-05
ENSMUSG00000045165	AI467606	2628	6.39339	6.45062	3.2421	1.41861e-08	1.8947e-05
ENSMUSG00000035783	Acta2	14501	6.26759	6.29496	4.14931	2.08346e-08	2.5297e-05
ENSMUSG00000032702	Kank1	197522	8.20491	8.4482	3.0573	2.69419e-08	2.99864e-05
ENSMUSG00000015647	Lama5	49487	-5.89646	-5.90531	5.38929	3.40843e-08	3.09166e-05
ENSMUSG00000025650	Col7a1	31290	3.62585	3.62804	5.12777	3.45974e-08	3.09166e-05
ENSMUSG00000115149	9330188P03Rik	42600	9.73236	10.1846	3.78325	3.47222e-08	3.09166e-05
ENSMUSG00000019737	Syne4	4240	4.71596	4.73476	3.1537	5.01624e-08	4.1873e-05
ENSMUSG00000064325	Hhip	92156	-6.92149	-6.97507	3.84587	5.48433e-08	4.30875e-05
ENSMUSG00000027656	Ccn5	12286	-3.84391	-3.84643	5.14479	6.0451e-08	4.48546e-05
ENSMUSG00000056073	Grik2	693934	-3.3745	-3.37824	4.10668	6.71559e-08	4.7207e-05
ENSMUSG00000056498	Tmem154	38384	7.07052	7.15588	3.35915	7.98765e-08	5.23663e-05
ENSMUSG00000079685	Ulbp1	33277	5.07954	5.11592	2.58332	8.2337e-08	5.23663e-05
ENSMUSG00000032179	Bmp5	124947	7.0511	7.09832	4.15588	8.95646e-08	5.43738e-05
ENSMUSG00000032419	Tbx18	28461	-4.49671	-4.51472	2.98881	9.5661e-08	5.55499e-05
ENSMUSG00000021719	Rgs7bp	109027	-6.81767	-6.88423	3.45515	1.09979e-07	6.12031e-05
ENSMUSG00000050541	Adra1b	126605	6.41433	6.57965	1.81981	1.27847e-07	6.61105e-05
ENSMUSG00000025927	Tfap2b	29663	-11.9083	-1.44269e+08	4.05824	1.28697e-07	6.61105e-05
ENSMUSG00000032291	Crabp1	8363	-13.7104	-1.44269e+08	5.85279	1.50138e-07	7.42684e-05
ENSMUSG00000086591	Dnah2os	5129	5.95653	6.02052	2.65123	1.56078e-07	7.44493e-05
ENSMUSG00000029468	P2rx7	47522	5.16149	5.18592	3.21594	1.6716e-07	7.69856e-05
ENSMUSG00000006205	Htra1	49550	-4.02	-4.02546	4.22214	1.93791e-07	8.54332e-05
ENSMUSG00000025743	Sdc3	33783	-8.08375	-8.21468	3.76332	1.98295e-07	8.54332e-05
ENSMUSG00000022340	Sybu	116208	-3.95831	-3.96841	3.26238	2.07954e-07	8.61409e-05
ENSMUSG00000040528	Milr1	17569	4.36745	4.38478	2.92097	2.12837e-07	8.61409e-05
ENSMUSG00000026676	Ccdc3	93103	-9.27232	-9.52377	4.06426	2.32684e-07	8.93215e-05
ENSMUSG00000045763	Basp1	50488	-3.82227	-3.83271	3.0823	2.34071e-07	8.93215e-05
ENSMUSG00000008575	Nfib	415578	-6.11812	-6.14372	4.09926	2.49108e-07	9.24189e-05
ENSMUSG00000040133	Gpr176	96310	-9.37937	-9.63085	4.17117	2.80883e-07	0.000100748
ENSMUSG00000028760	Eif4g3	215487	-6.93819	-7.00487	3.55491	2.86644e-07	0.000100748
ENSMUSG00000003559	As3mt	33642	8.12754	8.37079	2.98232	3.1739e-07	0.000108694
ENSMUSG00000028532	Cachd1	252546	-2.95197	-2.95582	3.63814	3.84955e-07	0.000128038
ENSMUSG00000060969	Irx1	5803	-2.69306	-2.6939	5.54371	3.93047e-07	0.000128038
ENSMUSG00000021390	Ogn	16456	-5.63006	-5.63557	5.8004	4.52213e-07	0.00014252
ENSMUSG00000054263	Lifr	106876	2.38992	2.39047	5.83154	4.58847e-07	0.00014252
ENSMUSG00000018920	Cxcl16	6002	8.6779	9.12963	2.74775	4.93196e-07	0.000149707
ENSMUSG00000040209	Zfp704	183066	-9.62883	-10.0945	3.6406	5.36853e-07	0.000159338
ENSMUSG00000032289	Thsd4	555116	-4.87615	-4.9025	2.82819	5.91231e-07	0.000169346
ENSMUSG00000064267	Hvcn1	35494	3.30781	3.31619	2.89175	5.9593e-07	0.000169346
ENSMUSG00000030790	Adm	2160	-11.3683	-1.44269e+08	3.52056	6.61512e-07	0.000177742
ENSMUSG00000069793	Slfn9	13441	4.1453	4.14772	5.50176	6.80347e-07	0.000177742
ENSMUSG00000117486	Gm30938	10436	7.90531	8.3564	1.98956	6.82136e-07	0.000177742
ENSMUSG00000038188	Scarf1	13043	4.35153	4.36327	3.44787	6.89349e-07	0.000177742
ENSMUSG00000024600	Slc27a6	56517	7.84074	8.29171	1.93957	6.92016e-07	0.000177742
ENSMUSG00000120992	NA	3740	2.71679	2.7183	4.73513	7.13726e-07	0.000178805
ENSMUSG00000036168	Ccdc38	43696	5.45762	5.50404	2.61918	7.2293e-07	0.000178805
ENSMUSG00000068617	Efcab1	74766	7.09241	7.33478	1.98233	8.16037e-07	0.000192064
ENSMUSG00000019894	Slc6a15	51595	-7.69108	-8.15531	1.74244	8.24033e-07	0.000192064
ENSMUSG00000039062	Anpep	39257	-8.7336	-8.98488	3.53263	8.27531e-07	0.000192064
ENSMUSG00000032009	Sesn3	58035	-8.22393	-8.35493	3.89615	8.34062e-07	0.000192064
ENSMUSG00000033453	Adamts15	23298	-8.68634	-8.79215	4.65417	9.49015e-07	0.000214831
ENSMUSG00000024420	Zfp521	285775	-6.32199	-6.37057	3.39723	1.03022e-06	0.000229327
ENSMUSG00000074676	Foxs1	1311	6.64177	6.88353	1.55488	1.0674e-06	0.000230147
ENSMUSG00000026107	Nabp1	12564	-5.32584	-5.36366	2.76687	1.06857e-06	0.000230147
ENSMUSG00000031497	Tnfsf13b	32606	4.71627	4.74992	2.34123	1.09663e-06	0.000230147
ENSMUSG00000034266	Batf	22419	4.23141	4.26074	2.04425	1.12236e-06	0.000230147
ENSMUSG00000071757	Zhx2	145168	-7.01344	-7.26342	1.85492	1.13613e-06	0.000230147
ENSMUSG00000020902	Ntn1	191460	-5.94715	-6.07651	1.68939	1.13729e-06	0.000230147
ENSMUSG00000026620	Mark1	102782	-8.56087	-8.66664	4.53369	1.17662e-06	0.000234551
ENSMUSG00000020325	Fstl3	5359	-4.98232	-5.05649	1.5043	1.20315e-06	0.000236314
ENSMUSG00000035948	Acss3	190152	-9.39441	-9.85996	3.40966	1.27716e-06	0.00024571
ENSMUSG00000051000	Fhip1a	157231	4.40996	4.45158	1.74797	1.28779e-06	0.00024571
ENSMUSG00000032554	Trf	26444	3.07465	3.07836	3.81068	1.39157e-06	0.000261771
ENSMUSG00000064294	Aox3	87569	-13.4931	-1.44269e+08	5.63607	1.41305e-06	0.000262122
ENSMUSG00000001435	Col18a1	114371	3.01793	3.02067	4.1845	1.45706e-06	0.000266582
ENSMUSG00000071604	Fam189a2	58270	-4.97951	-5.04463	1.67896	1.55921e-06	0.000281417
ENSMUSG00000034786	Gpsm3	1949	2.88842	2.89321	3.25406	1.6477e-06	0.000289401
ENSMUSG00000021070	Bdkrb2	32012	-3.12027	-3.12435	3.70828	1.65247e-06	0.000289401
ENSMUSG00000073565	Prr16	302312	-5.08281	-5.13046	2.22135	1.66846e-06	0.000289401
ENSMUSG00000020086	Macroh2a2	45483	-4.41615	-4.45065	2.00276	1.69204e-06	0.000289729
ENSMUSG00000031520	Vegfc	109491	-11.5396	-1.44269e+08	3.69366	1.7962e-06	0.000303671
ENSMUSG00000045620	Odf3l1	16021	-6.37154	-6.44721	2.81301	1.85864e-06	0.000310299
ENSMUSG00000056888	Glipr1	17184	7.58615	8.03683	1.67989	1.92427e-06	0.000313637
ENSMUSG00000037913	Tmem156	37787	7.25092	7.70107	1.36991	1.9256e-06	0.000313637
ENSMUSG00000120477	NA	11910	4.96732	5.01787	2.01805	2.04556e-06	0.000326495
ENSMUSG00000006369	Fbln1	80587	-7.87345	-8.12431	2.68543	2.06714e-06	0.000326495
ENSMUSG00000013033	Adgrl1	41850	-4.72281	-4.72926	4.67421	2.09869e-06	0.000326495
ENSMUSG00000034898	Filip1	207758	2.85738	2.86373	2.82923	2.10232e-06	0.000326495
ENSMUSG00000057098	Ebf1	390775	-5.50897	-5.56758	2.33519	2.19547e-06	0.000326835
ENSMUSG00000020919	Stat5b	69994	-2.89323	-2.89794	3.28157	2.20556e-06	0.000326835
ENSMUSG00000021943	Gdf10	14397	-12.4007	-1.44269e+08	4.5482	2.20566e-06	0.000326835
ENSMUSG00000028072	Ntrk1	16919	9.81162	1.44269e+08	2.00246	2.2109e-06	0.000326835
ENSMUSG00000023047	Amhr2	9267	4.72593	4.79721	1.33135	2.22777e-06	0.000326835
ENSMUSG00000042842	Serpinb6b	13859	4.38342	4.40856	2.40673	2.25134e-06	0.000326835
ENSMUSG00000025104	Hdgfl3	53223	-7.17713	-7.30771	2.86084	2.27724e-06	0.00032704
ENSMUSG00000037736	Limch1	311332	7.12142	7.57134	1.25167	2.33642e-06	0.000331971
ENSMUSG00000008153	Clstn3	34214	5.05089	5.06315	4.07679	2.42969e-06	0.000341589
ENSMUSG00000021990	Spata13	130556	4.08125	4.11043	1.90734	2.49774e-06	0.000347498
ENSMUSG00000040310	Alx4	38956	-10.1635	-1.44269e+08	2.33967	2.56994e-06	0.000353857
ENSMUSG00000024534	Sncaip	148227	-8.10633	-8.57104	2.14747	2.63317e-06	0.000358834
ENSMUSG00000014329	Bicc1	236869	-5.16403	-5.19194	3.02774	2.65982e-06	0.000358834
ENSMUSG00000086712	Mexis	8877	4.54002	4.59003	1.61907	2.68862e-06	0.000359092
ENSMUSG00000056069	Otulinl	26511	-7.24067	-7.7042	1.31638	2.85468e-06	0.000377496
ENSMUSG00000039601	Rcan2	238166	-5.99327	-6.16336	1.37895	2.99054e-06	0.000391585
ENSMUSG00000042607	Asb4	49637	9.62298	1.44269e+08	1.82356	3.13251e-06	0.000406192
ENSMUSG00000051339	2900026A02Rik	134914	-10.351	-1.44269e+08	2.5227	3.26102e-06	0.000417922
ENSMUSG00000028036	Ptgfr	41129	-6.49463	-6.62456	2.22183	3.305e-06	0.000417922
ENSMUSG00000071847	Apcdd1	38949	-4.50771	-4.51362	4.58293	3.3574e-06	0.000417922
ENSMUSG00000020758	Itgb4	33704	2.84573	2.85007	3.35904	3.3784e-06	0.000417922
ENSMUSG00000045377	Tmem88	1716	4.48048	4.54264	1.27598	3.37943e-06	0.000417922
ENSMUSG00000004266	Ptpn6	18008	2.56811	2.57003	4.234	3.47813e-06	0.000426183
ENSMUSG00000031502	Col4a1	114404	4.77873	4.78318	5.28183	3.7508e-06	0.000450861
ENSMUSG00000095742	NA	NA	-7.70377	-8.16802	1.75738	3.76364e-06	0.000450861
ENSMUSG00000025383	Il23a	2614	4.19988	4.24484	1.45019	3.7808e-06	0.000450861
ENSMUSG00000025795	Rassf3	65998	-6.79447	-7.25703	0.895505	3.98025e-06	0.000470444
ENSMUSG00000032024	Clmp	99358	-4.92531	-4.95467	2.71069	4.14445e-06	0.000485555
ENSMUSG00000023011	Faim2	31154	4.33692	4.33883	6.02688	4.26158e-06	0.000494936
ENSMUSG00000027750	Postn	29929	-7.61237	-7.64423	5.26949	4.43829e-06	0.000511015
ENSMUSG00000031790	Mmp15	22813	5.86533	6.02984	1.30431	4.57783e-06	0.000518243
ENSMUSG00000051177	Plcb1	689192	-4.18213	-4.21433	1.85684	4.57867e-06	0.000518243
ENSMUSG00000038267	Slc22a23	166025	-6.03187	-6.13644	2.03176	4.64884e-06	0.000521764
ENSMUSG00000046709	Mapk10	303387	6.79985	6.96564	2.18933	4.95724e-06	0.000551741
ENSMUSG00000004043	Stat5a	25819	-3.29913	-3.31117	2.36267	5.22184e-06	0.000573727
ENSMUSG00000034881	Tbxa2r	6442	4.77865	4.82907	1.83488	5.24973e-06	0.000573727
ENSMUSG00000027208	Fgf7	56528	3.22746	3.2432	1.93801	5.28365e-06	0.000573727
ENSMUSG00000024501	Dpysl3	117303	-2.5164	-2.51989	3.32108	5.51728e-06	0.000591457
ENSMUSG00000005397	Nid1	74719	-11.6493	-1.44269e+08	3.80296	5.57161e-06	0.000591457
ENSMUSG00000031216	Stard8	71481	5.88176	6.04623	1.33046	5.57978e-06	0.000591457
ENSMUSG00000029121	Crmp1	50194	-6.76319	-6.93441	2.09392	5.66582e-06	0.000594551
ENSMUSG00000075304	Sp5	2807	-10.9095	-1.44269e+08	3.0726	5.71063e-06	0.000594551
ENSMUSG00000027546	Atp9a	107972	6.77982	6.90593	2.52739	5.74252e-06	0.000594551
ENSMUSG00000038608	Dock10	257455	6.67394	7.12284	0.831613	5.8299e-06	0.000598954
ENSMUSG00000029859	Epha1	14782	9.68472	1.44269e+08	1.88836	5.93554e-06	0.000602179
ENSMUSG00000025790	Slco3a1	279362	-7.05174	-7.5149	1.13854	5.95146e-06	0.000602179
ENSMUSG00000002257	Def6	20831	2.0953	2.096	5.15589	6.05912e-06	0.000603399
ENSMUSG00000022330	Osr2	7208	-2.6511	-2.65335	4.08856	6.05964e-06	0.000603399
ENSMUSG00000030257	Srgap3	229296	4.18369	4.19202	3.78291	6.09904e-06	0.000603399
ENSMUSG00000024696	Lpxn	37615	3.31513	3.34009	1.39047	6.1898e-06	0.000607875
ENSMUSG00000033152	Podxl2	32487	-5.27434	-5.37778	1.33964	6.31711e-06	0.000615849
ENSMUSG00000046532	Ar	174447	-11.3818	-1.44269e+08	3.5381	6.38285e-06	0.000617749
ENSMUSG00000031586	Rbpms	147221	-4.62226	-4.64846	2.57588	6.43156e-06	0.000617985
ENSMUSG00000038811	Gngt2	8519	3.8048	3.81567	3.03518	6.72316e-06	0.00064139
ENSMUSG00000020123	Avpr1a	4954	-10.6021	-1.44269e+08	2.77	6.91655e-06	0.00065516
ENSMUSG00000050157	Gm867	2950	3.55322	3.56313	2.90402	7.04332e-06	0.000659831
ENSMUSG00000045761	Togaram2	56409	5.73107	5.97088	0.699554	7.06468e-06	0.000659831
ENSMUSG00000059325	Hopx	28134	3.13538	3.14113	3.24829	7.12729e-06	0.000661056
ENSMUSG00000052142	Rasal3	12925	8.90152	1.44269e+08	1.14	7.24105e-06	0.000666976
ENSMUSG00000041912	Tdrkh	21396	-9.39816	-1.44269e+08	1.59252	7.32698e-06	0.000670268
ENSMUSG00000096956	Snhg18	4138	-7.30813	-7.77178	1.38329	7.40941e-06	0.000673198
ENSMUSG00000056492	Adgrf5	99107	5.05462	5.06409	4.47678	7.6059e-06	0.000686381
ENSMUSG00000059895	Ptp4a3	35622	-7.11741	-7.58071	1.20224	7.86432e-06	0.000700212
ENSMUSG00000033460	Armcx1	3955	-5.46654	-5.63558	0.870539	7.89582e-06	0.000700212
ENSMUSG00000075302	Erich2	32066	-10.8804	-1.44269e+08	3.04313	7.91644e-06	0.000700212
ENSMUSG00000039109	F13a1	183069	-5.72121	-5.73906	4.22612	8.01752e-06	0.00070415
ENSMUSG00000029673	Auts2	1106013	-8.18482	-8.43586	2.99302	8.06641e-06	0.00070415
ENSMUSG00000059336	Slc14a1	42029	7.00496	7.45464	1.15102	8.20559e-06	0.000711067
ENSMUSG00000050600	Zfp831	67299	8.94965	1.44269e+08	1.19064	8.26151e-06	0.000711067
ENSMUSG00000075012	Fjx1	3134	-6.73919	-7.20162	0.846899	8.30537e-06	0.000711067
ENSMUSG00000073400	Trim10	8260	9.01571	1.44269e+08	1.25277	8.36439e-06	0.000711559
ENSMUSG00000086995	Gm13544	10124	8.88379	1.44269e+08	1.11756	9.17859e-06	0.000775881
ENSMUSG00000032607	Amt	5450	2.28535	2.28749	3.77792	9.24429e-06	0.00077652
ENSMUSG00000078817	Nlrp12	30913	5.61876	5.85824	0.602038	9.41766e-06	0.000786139
ENSMUSG00000003949	Hlf	54360	-6.81624	-7.06586	1.68373	9.86466e-06	0.000818338
ENSMUSG00000038668	Lpar1	118644	-5.60847	-5.68347	2.10121	1.03614e-05	0.000851171
ENSMUSG00000051067	Lingo3	11239	-6.86089	-7.11076	1.70727	1.03879e-05	0.000851171
ENSMUSG00000018169	Mfng	17594	2.28534	2.28634	4.87267	1.07405e-05	0.000874692
ENSMUSG00000048368	Omd	10361	-7.54152	-7.71335	2.85919	1.11875e-05	0.000898925
ENSMUSG00000038530	Rgs4	6166	4.77621	4.80603	2.55538	1.12327e-05	0.000898925
ENSMUSG00000068113	Tesl1	25055	6.68326	7.13219	0.849023	1.12399e-05	0.000898925
ENSMUSG00000047638	Nr1h4	79352	2.56148	2.56752	2.59885	1.1354e-05	0.000902441
ENSMUSG00000028197	Col24a1	259534	5.60657	5.73126	1.41978	1.1419e-05	0.000902441
ENSMUSG00000021567	Nkd2	29098	-12.0143	-1.44269e+08	4.16496	1.17119e-05	0.000920142
ENSMUSG00000021250	Fos	3384	-3.74981	-3.7569	3.56038	1.18111e-05	0.000922509
ENSMUSG00000034656	Cacna1a	301608	-1.83271	-1.83297	6.31302	1.22399e-05	0.000947357
ENSMUSG00000022871	Fetub	21445	2.37194	2.3756	3.10749	1.22711e-05	0.000947357
ENSMUSG00000034731	Dgkh	174027	-4.18621	-4.22558	1.60827	1.25511e-05	0.000955462
ENSMUSG00000031434	Morc4	50046	-6.39481	-6.85615	0.542488	1.25804e-05	0.000955462
ENSMUSG00000028369	Svep1	164418	-10.8912	-1.44269e+08	3.05521	1.26033e-05	0.000955462
ENSMUSG00000002885	Adgre5	18076	-6.97316	-7.43615	1.06312	1.26622e-05	0.000955462
ENSMUSG00000018381	Abi3	12403	3.92254	3.9553	1.59205	1.28423e-05	0.000963604
ENSMUSG00000046058	Eid2	1392	-7.22848	-7.69199	1.30949	1.32671e-05	0.000989922
ENSMUSG00000001520	Nrip2	17132	5.99248	6.23297	0.962462	1.37707e-05	0.0010128
ENSMUSG00000057895	Zfp105	7957	-6.51649	-6.76583	1.37896	1.38612e-05	0.0010128
ENSMUSG00000047867	Gimap6	6644	5.64279	5.74346	1.73671	1.39038e-05	0.0010128
ENSMUSG00000041117	Ccdc8	4809	6.47473	6.53205	3.30872	1.39348e-05	0.0010128
ENSMUSG00000039787	Cercam	13677	3.4823	3.49024	3.13606	1.39529e-05	0.0010128
ENSMUSG00000026888	Grb14	112512	-10.3183	-1.44269e+08	2.4933	1.45471e-05	0.00105022
ENSMUSG00000031748	Gnao1	159423	-2.83254	-2.83734	3.19173	1.54033e-05	0.00110606
ENSMUSG00000038156	Spon1	277371	-8.29209	-8.42311	3.96459	1.56815e-05	0.00112001
ENSMUSG00000021994	Wnt5a	22699	-6.79497	-7.25753	0.883215	1.5845e-05	0.00112567
ENSMUSG00000031283	Chrdl1	108589	1.91223	1.91267	5.62885	1.59385e-05	0.00112632
ENSMUSG00000039958	Etfbkmt	11323	-9.71874	-1.44269e+08	1.91097	1.61185e-05	0.00113305
ENSMUSG00000040596	Pogk	25242	-6.30141	-6.47208	1.65463	1.63266e-05	0.00114166
ENSMUSG00000054342	Kcnn4	16428	3.67117	3.67429	4.67866	1.64969e-05	0.00114756
ENSMUSG00000044313	Mab21l3	35884	4.399	4.55871	0.0162836	1.66615e-05	0.00115301
ENSMUSG00000049420	Tmem200a	166722	-6.91188	-7.04224	2.62	1.71508e-05	0.0011803
ENSMUSG00000002900	Lamb1	64411	-2.64187	-2.64225	6.62157	1.72326e-05	0.0011803
ENSMUSG00000026247	Ecel1	8867	-7.40549	-7.86931	1.47825	1.73546e-05	0.0011826
ENSMUSG00000044365	Cxxc4	25678	5.98843	6.43501	0.219315	1.76213e-05	0.00119467
ENSMUSG00000031304	Il2rg	3878	2.48494	2.48757	3.6931	1.77671e-05	0.00119847
ENSMUSG00000097154	Gm26510	50671	4.11866	4.15669	1.59105	1.8082e-05	0.00121358
ENSMUSG00000029304	Spp1	5933	3.12077	3.1214	6.40301	1.84091e-05	0.00122936
ENSMUSG00000020646	Mboat2	133519	-8.82963	-1.44269e+08	1.06094	1.87231e-05	0.00124411
ENSMUSG00000020689	Itgb3	62477	-2.01706	-2.01726	6.86828	1.9034e-05	0.00125851
ENSMUSG00000030222	Rerg	115673	-8.42483	-1.44269e+08	0.681934	1.91581e-05	0.00126047
ENSMUSG00000039683	Sdk1	974097	-5.6191	-5.69423	2.08899	1.93494e-05	0.00126387
ENSMUSG00000027611	Procr	4355	2.0415	2.04287	4.15376	1.93991e-05	0.00126387
ENSMUSG00000034957	Cebpa	2636	-10.4599	-1.44269e+08	2.63164	1.95753e-05	0.00126916
ENSMUSG00000017491	Rarb	388385	-4.14389	-4.16839	2.21803	1.97182e-05	0.00127225
ENSMUSG00000031772	Cntnap4	312675	5.94553	6.18595	0.903554	1.99284e-05	0.00127963
ENSMUSG00000027215	Cd82	44030	1.78561	1.78649	4.48568	2.01369e-05	0.00128014
ENSMUSG00000025494	Sigirr	9398	4.49043	4.57274	0.914451	2.01976e-05	0.00128014
ENSMUSG00000074570	Cass4	39964	4.00903	4.04417	1.60497	2.02238e-05	0.00128014
ENSMUSG00000019027	Dnah1	63522	6.20266	6.65005	0.399926	2.08799e-05	0.00131543
ENSMUSG00000001986	Gria3	277748	-5.87866	-6.33802	0.0706904	2.14525e-05	0.00133859
ENSMUSG00000040729	Cep126	57834	-8.22348	-1.44269e+08	0.495347	2.1507e-05	0.00133859
ENSMUSG00000015053	Gata2	13142	2.86282	2.87344	2.12041	2.17164e-05	0.00133859
ENSMUSG00000015217	Hmgb3	4759	-7.05249	-7.22398	2.37482	2.17933e-05	0.00133859
ENSMUSG00000063672	Nkx6-3	5680	6.17724	6.62455	0.398764	2.18515e-05	0.00133859
ENSMUSG00000022148	Fyb	140461	4.90611	5.02926	0.777877	2.19017e-05	0.00133859
ENSMUSG00000030701	Plekhb1	19523	3.67909	3.70461	1.72497	2.1949e-05	0.00133859
ENSMUSG00000029361	Nos1	177809	4.07654	4.12137	1.31157	2.21981e-05	0.00134733
ENSMUSG00000036957	Lrfn3	7284	-6.4914	-6.95313	0.62341	2.22941e-05	0.00134733
ENSMUSG00000026672	Optn	43410	-5.59518	-5.84215	0.528	2.26903e-05	0.0013651
ENSMUSG00000027261	Hao1	57008	3.8755	3.91615	1.27453	2.30003e-05	0.00137666
ENSMUSG00000032925	Itgbl1	315648	-9.64234	-1.44269e+08	1.83458	2.31145e-05	0.00137666
ENSMUSG00000051817	Sox12	4453	-6.05124	-6.18083	1.77144	2.31917e-05	0.00137666
ENSMUSG00000039470	Zdhhc2	86454	1.91956	1.92061	4.39517	2.37585e-05	0.00140406
ENSMUSG00000030499	Kctd15	17719	-6.25714	-6.50597	1.12273	2.43875e-05	0.00143489
ENSMUSG00000037138	Aff3	487630	-2.76406	-2.76511	5.30278	2.49296e-05	0.00146003
ENSMUSG00000062901	Klhl24	31680	-1.96109	-1.96148	5.85557	2.50898e-05	0.00146003
ENSMUSG00000085843	Kank4os	5133	2.46234	2.46746	2.72434	2.51428e-05	0.00146003
ENSMUSG00000025888	Casp1	8783	2.9049	2.91173	2.77934	2.71514e-05	0.00156984
ENSMUSG00000027016	Zfp385b	409006	2.5215	2.52679	2.73936	2.73545e-05	0.00157477
ENSMUSG00000060548	Tnfrsf19	82616	-5.37386	-5.50223	1.14926	2.76594e-05	0.0015765
ENSMUSG00000024663	Rab3il1	36712	-2.80819	-2.81173	3.61723	2.77287e-05	0.0015765
ENSMUSG00000032238	Rora	734461	-9.94426	-1.44269e+08	2.12859	2.77387e-05	0.0015765
ENSMUSG00000070424	Art5	12611	3.8849	3.96521	0.377616	2.79978e-05	0.00158448
ENSMUSG00000018008	Cyth4	24973	3.70312	3.73177	1.5688	2.81412e-05	0.00158588
ENSMUSG00000024598	Fbn2	201865	-11.7601	-1.44269e+08	3.91251	2.8609e-05	0.00160547
ENSMUSG00000042988	Notum	7388	-9.66031	-1.44269e+08	1.85401	2.88388e-05	0.0016116
ENSMUSG00000030306	Tmtc1	211960	-6.84304	-6.94818	2.84869	2.90054e-05	0.00161415
ENSMUSG00000090019	Gimap1	4742	8.05339	1.44269e+08	0.356802	2.99056e-05	0.00165734
ENSMUSG00000047013	Fbxo41	33421	8.5332	1.44269e+08	0.812112	3.18798e-05	0.00175945
ENSMUSG00000021213	Akr1c13	14447	3.24942	3.25588	3.19322	3.26227e-05	0.00179304
ENSMUSG00000049047	Armcx3	4861	-7.88795	-1.44269e+08	0.193217	3.2876e-05	0.00179956
ENSMUSG00000106139	Gm30648	13291	5.78231	6.22793	0.0401831	3.33184e-05	0.00181633
ENSMUSG00000034171	Faah	50782	-2.15327	-2.15566	3.47196	3.38793e-05	0.0018394
ENSMUSG00000021211	Akr1c12	11258	3.04408	3.06264	1.52538	3.43931e-05	0.00185973
ENSMUSG00000068758	Il3ra	9737	-8.53629	-1.44269e+08	0.788334	3.51704e-05	0.0018941
ENSMUSG00000085921	Gm13752	5629	3.04482	3.06503	1.41364	3.57615e-05	0.00191819
ENSMUSG00000119995	NA	19659	8.3264	1.44269e+08	0.598033	3.69167e-05	0.00197224
ENSMUSG00000062960	Kdr	45632	-8.28284	-8.32785	5.44487	3.71603e-05	0.00197734
ENSMUSG00000019906	Lin7a	149789	-7.91532	-1.44269e+08	0.220105	3.7646e-05	0.00199524
ENSMUSG00000020712	Tcam1	12074	2.75514	2.76043	2.99488	3.82427e-05	0.00201885
ENSMUSG00000060530	A930017M01Rik	132462	-4.44205	-4.5434	0.572692	3.94227e-05	0.00207295
ENSMUSG00000060044	Tmem26	59005	-7.84893	-1.44269e+08	0.161424	4.00173e-05	0.00209594
ENSMUSG00000025920	Stau2	291439	-4.23522	-4.33583	0.391987	4.01737e-05	0.00209594
ENSMUSG00000026874	Hc	78108	5.68299	6.12815	-0.0333802	4.04378e-05	0.00210151
ENSMUSG00000042258	Isl1	11409	2.19999	2.20165	4.04724	4.11634e-05	0.00213092
ENSMUSG00000074220	Zfp382	13009	-7.69537	-1.44269e+08	0.0230878	4.16674e-05	0.00214869
ENSMUSG00000042115	Klhdc8a	8732	2.37353	2.37549	4.00258	4.26818e-05	0.00219253
ENSMUSG00000027221	Chst1	15544	-6.28996	-6.53887	1.16932	4.32195e-05	0.00221164
ENSMUSG00000019929	Dcn	38535	-4.45156	-4.45462	5.48125	4.42334e-05	0.00225489
ENSMUSG00000054453	Sytl5	108922	-7.69863	-1.44269e+08	0.0243038	4.59183e-05	0.00232791
ENSMUSG00000022656	Nectin3	110820	-8.98875	-1.44269e+08	1.19617	4.60144e-05	0.00232791
ENSMUSG00000000409	Lck	25298	3.12871	3.13933	2.39541	4.72194e-05	0.00237986
ENSMUSG00000035493	Tgfbi	30040	2.63207	2.63258	6.19972	4.753e-05	0.00238651
ENSMUSG00000036103	Colec12	175050	-13.0995	-1.44269e+08	5.24388	4.79611e-05	0.00239913
ENSMUSG00000066720	Cldn9	1443	3.59333	3.60759	2.42874	4.83372e-05	0.00240893
ENSMUSG00000079259	Trim71	57237	-5.98962	-6.15979	1.36363	4.89297e-05	0.00242939
ENSMUSG00000085757	Tslrn1	16473	2.84774	2.85322	3.01783	5.00334e-05	0.00247499
ENSMUSG00000108348	Pnma8c	5067	8.76469	1.44269e+08	0.991842	5.07857e-05	0.00250121
ENSMUSG00000034684	Sema3f	28976	-6.3859	-6.63501	1.26334	5.0938e-05	0.00250121
ENSMUSG00000001870	Ltbp1	386945	1.80118	1.8013	7.33829	5.15538e-05	0.00252217
ENSMUSG00000026110	Mgat4a	101677	-3.80334	-3.87458	0.442681	5.27282e-05	0.00257021
ENSMUSG00000062184	Hs6st2	294645	-5.52776	-5.77459	0.460954	5.34143e-05	0.00259419
ENSMUSG00000030510	Cers3	80188	3.52956	3.58906	0.455286	5.4361e-05	0.00262165
ENSMUSG00000015476	Prrt1	3594	4.66947	4.83047	0.230796	5.43724e-05	0.00262165
ENSMUSG00000034112	Atp2c2	57709	3.90574	3.92284	2.46927	5.67103e-05	0.00272454
ENSMUSG00000118365	Gm41724	48665	-3.91318	-3.95536	1.23316	5.72653e-05	0.00274135
ENSMUSG00000028111	Ctsk	10107	4.87237	4.87972	4.6631	5.80079e-05	0.00275568
ENSMUSG00000041633	Kctd12b	11238	4.11986	4.1811	0.960585	5.80602e-05	0.00275568
ENSMUSG00000075028	Prdm11	74150	-5.83857	-6.29769	0.0531238	5.82079e-05	0.00275568
ENSMUSG00000028167	Bdh2	23206	-2.1683	-2.17008	3.92315	5.83984e-05	0.00275568
ENSMUSG00000056749	Nfil3	13865	1.71312	1.71352	5.50942	5.87869e-05	0.00275568
ENSMUSG00000025429	Pstpip2	92966	3.96158	4.02244	0.821013	5.88027e-05	0.00275568
ENSMUSG00000090839	Gm17094	52205	6.0329	6.47965	0.260371	5.95062e-05	0.0027789
ENSMUSG00000090066	1110002E22Rik	16455	5.1488	5.31149	0.638184	6.02169e-05	0.00279784
ENSMUSG00000023045	Soat2	12944	4.42488	4.46327	1.88884	6.03308e-05	0.00279784
ENSMUSG00000038507	Parp12	31940	-9.52263	-1.44269e+08	1.72406	6.35676e-05	0.00293304
ENSMUSG00000097254	C430042M11Rik	2744	4.06055	4.12164	0.912653	6.38464e-05	0.00293304
ENSMUSG00000020388	Pdlim4	14087	-4.07532	-4.12616	1.15584	6.3905e-05	0.00293304
ENSMUSG00000000416	Cttnbp2	148366	7.51124	1.44269e+08	-0.112543	6.43858e-05	0.00294499
ENSMUSG00000067212	H2-T23	3083	-6.91477	-7.37764	1.01853	6.64414e-05	0.00302444
ENSMUSG00000042659	Arrdc4	12247	-5.77035	-5.9401	1.15788	6.65757e-05	0.00302444
ENSMUSG00000060131	Atp8b4	179702	4.59043	4.71252	0.515872	6.71426e-05	0.00303985
ENSMUSG00000052087	Rgs14	14956	2.68906	2.70934	1.05955	6.75604e-05	0.00304347
ENSMUSG00000011382	Dhdh	17819	7.61923	1.44269e+08	-0.0237046	6.77174e-05	0.00304347
ENSMUSG00000106951	5930430L01Rik	5168	-7.73543	-1.44269e+08	0.0566803	6.79061e-05	0.00304347
ENSMUSG00000032184	Lysmd2	12031	-7.73755	-1.44269e+08	0.0574954	6.88682e-05	0.00307627
ENSMUSG00000028785	Hpca	10467	7.80869	1.44269e+08	0.153934	6.95857e-05	0.00309661
ENSMUSG00000031362	Xlr4c	9443	5.48093	5.71998	0.490169	6.97872e-05	0.00309661
ENSMUSG00000037788	Vopp1	97353	-5.49553	-5.66463	0.893	7.03391e-05	0.00311076
ENSMUSG00000052551	Adarb2	565882	5.57119	6.01575	-0.122176	7.18232e-05	0.00316591
ENSMUSG00000028487	Bnc2	400181	-2.41679	-2.41725	6.11423	7.23068e-05	0.00317327
ENSMUSG00000000782	Tcf7	30961	-2.74745	-2.76149	1.6195	7.24654e-05	0.00317327
ENSMUSG00000026586	Prrx1	68592	2.25903	2.25941	6.21427	7.29274e-05	0.00317879
ENSMUSG00000034127	Tspan8	33062	7.94462	1.44269e+08	0.262136	7.30675e-05	0.00317879
ENSMUSG00000047497	Adamts12	284442	3.90458	3.95875	0.906807	7.39029e-05	0.0032047
ENSMUSG00000057000	Nxf3	13157	1.95603	1.95819	3.39671	7.46772e-05	0.00322779
ENSMUSG00000073599	Ecscr	9271	1.76415	1.765	4.52119	7.5097e-05	0.00323547
ENSMUSG00000022831	Hcls1	28230	7.37336	1.44269e+08	-0.225665	7.53504e-05	0.00323595
ENSMUSG00000021388	Aspn	23123	-7.48612	-7.5745	3.72949	7.76498e-05	0.00332401
ENSMUSG00000037321	Tap1	9673	-5.93038	-6.39002	0.125261	7.85148e-05	0.0033503
ENSMUSG00000043079	Synpo	66170	-5.01135	-5.0465	2.55774	7.91634e-05	0.00336447
ENSMUSG00000086515	Erich2os	6098	-7.60827	-1.44269e+08	-0.0478482	7.93506e-05	0.00336447
ENSMUSG00000106783	Chaer1	4383	3.97268	4.05337	0.448433	8.1406e-05	0.00344069
ENSMUSG00000068874	Selenbp1	11703	-6.0473	-6.21749	1.43412	8.21771e-05	0.00346232
ENSMUSG00000039891	Txlnb	49440	3.32567	3.37272	0.554701	8.39988e-05	0.00351811
ENSMUSG00000019278	Dpep1	15571	-7.67724	-8.14136	1.75439	8.40279e-05	0.00351811
ENSMUSG00000021464	Ror2	176813	-9.55471	-1.44269e+08	1.75618	8.49176e-05	0.00354425
ENSMUSG00000029999	Tgfa	80497	-4.50832	-4.74998	-0.397603	8.88048e-05	0.00369494
ENSMUSG00000044770	Scml4	100411	7.67594	1.44269e+08	0.0436693	9.0599e-05	0.00375789
ENSMUSG00000037033	Clca3b	26735	7.63152	1.44269e+08	-0.000268272	9.15523e-05	0.00378567
ENSMUSG00000055737	Ghr	265733	-2.75815	-2.7614	3.67832	9.25938e-05	0.00381692
ENSMUSG00000046814	Gchfr	4618	-7.67493	-1.44269e+08	0.00602338	9.50534e-05	0.00390626
ENSMUSG00000025665	Rps6ka6	149768	-7.45357	-1.44269e+08	-0.187727	9.69262e-05	0.003971
ENSMUSG00000025586	Cpeb1	108440	-4.05608	-4.07664	2.35416	9.7524e-05	0.00398327
ENSMUSG00000066637	Ttc32	11992	-5.2771	-5.73291	-0.437047	9.96088e-05	0.00405602
ENSMUSG00000037337	Map4k1	21230	2.09708	2.09836	4.2998	0.000100743	0.00407596
ENSMUSG00000024863	Mbl2	6746	7.90559	1.44269e+08	0.246578	0.000100847	0.00407596
ENSMUSG00000023947	Nfkbie	7467	1.5705	1.57118	4.6028	0.000101014	0.00407596
ENSMUSG00000026638	Irf6	18913	2.65675	2.67893	0.906895	0.000103512	0.00414032
ENSMUSG00000073591	Pcdhb22	6609	-2.86625	-2.87531	2.3477	0.000103526	0.00414032
ENSMUSG00000003526	Prodh	29847	-8.72613	-1.44269e+08	0.966762	0.000103539	0.00414032
ENSMUSG00000028469	Npr2	19310	-3.11838	-3.12767	2.56711	0.000104356	0.00416053
ENSMUSG00000035357	Pdzrn3	228289	-7.02815	-7.49127	1.12607	0.000106055	0.00421568
ENSMUSG00000026726	Cubn	215476	2.41803	2.42148	3.24204	0.00010667	0.00422755
ENSMUSG00000052572	Dlg2	1972576	3.23708	3.27971	0.610018	0.000107267	0.00423862
ENSMUSG00000072949	Acot1	8882	-4.7619	-4.83582	1.2781	0.000107882	0.00424818
ENSMUSG00000031558	Slit2	324596	-8.22102	-1.44269e+08	0.488072	0.000108183	0.00424818
ENSMUSG00000003617	Cp	52092	-2.91468	-2.91568	5.53885	0.000108463	0.00424818
ENSMUSG00000015202	Cnksr3	93175	-4.76179	-4.88863	0.58885	0.000109267	0.00426715
ENSMUSG00000038296	Galnt18	308317	-4.46772	-4.59343	0.333676	0.000110587	0.00429932
ENSMUSG00000026365	Cfh	99057	-7.10067	-7.56384	1.20733	0.000110734	0.00429932
ENSMUSG00000025875	Tspan17	7400	-6.58005	-7.04206	0.710599	0.000112371	0.00435021
ENSMUSG00000020553	Pctp	20230	-7.3955	-1.44269e+08	-0.230758	0.000112752	0.00435234
ENSMUSG00000031980	Agt	13173	-10.5279	-1.44269e+08	2.70145	0.000113791	0.00436987
ENSMUSG00000028348	Cavin4	9989	3.48955	3.52626	1.03897	0.00011386	0.00436987
ENSMUSG00000049044	Rapgef4	276235	2.5477	2.55819	1.81151	0.000114912	0.0043976
ENSMUSG00000021047	Nova1	124413	-7.51587	-1.44269e+08	-0.13287	0.000116145	0.00443211
ENSMUSG00000048482	Bdnf	52308	1.90696	1.90787	4.57315	0.000118366	0.00450399
ENSMUSG00000029648	Flt1	164408	-3.19535	-3.22076	1.25949	0.000118827	0.00450866
ENSMUSG00000030156	Cd69	8112	3.6093	3.76347	-0.616158	0.0001209	0.00456817
ENSMUSG00000011256	Adam19	91352	1.83887	1.84054	3.63236	0.000121079	0.00456817
ENSMUSG00000090946	Ccdc71l	4240	-7.48407	-1.44269e+08	-0.154974	0.000122326	0.0046022
ENSMUSG00000030020	Prickle2	335248	1.72634	1.72701	4.82284	0.000123487	0.00463283
ENSMUSG00000055745	Rtl6	4426	-7.93243	-1.44269e+08	0.234716	0.000124232	0.00463762
ENSMUSG00000028211	Trp53inp1	17949	-2.29553	-2.29777	3.72362	0.000124659	0.00463762
ENSMUSG00000111977	Gm47163	1665	-7.29983	-1.44269e+08	-0.311249	0.000124781	0.00463762
ENSMUSG00000016494	Cd34	22461	-3.28515	-3.28568	6.82616	0.000125003	0.00463762
ENSMUSG00000042834	Nrep	27011	-4.21379	-4.22418	3.48831	0.000126316	0.00467333
ENSMUSG00000026475	Rgs16	5120	-6.55112	-6.80053	1.42112	0.000126875	0.00468107
ENSMUSG00000057948	Unc13d	15867	3.75382	3.76633	2.78522	0.000128334	0.00472183
ENSMUSG00000037868	Egr2	6714	-3.60478	-3.61211	3.36843	0.000128739	0.00472373
ENSMUSG00000038718	Pbx3	201686	-1.87331	-1.87385	5.27995	0.000129948	0.00475184
ENSMUSG00000023067	Cdkn1a	9752	-4.56735	-4.6191	1.58812	0.000130217	0.00475184
ENSMUSG00000054580	Pla2r1	135766	4.37729	4.43919	1.1961	0.000135039	0.00491439
ENSMUSG00000044576	Garem2	13218	-3.22855	-3.25717	1.1181	0.000136292	0.00494651
ENSMUSG00000032812	Arap1	64520	-1.66043	-1.6611	4.72273	0.000136894	0.00495488
ENSMUSG00000021792	Prxl2a	20049	-2.83706	-2.84439	2.58694	0.000138875	0.00501303
ENSMUSG00000043391	2510009E07Rik	45621	-7.82244	-1.44269e+08	0.142716	0.000140818	0.00506945
ENSMUSG00000026175	Vil1	26184	3.37882	3.42614	0.597489	0.000144271	0.00517084
ENSMUSG00000031410	Nxf7	19223	4.49838	4.65857	0.1082	0.000144565	0.00517084
ENSMUSG00000051900	Abca16	135167	8.31395	1.44269e+08	0.60348	0.000144796	0.00517084
ENSMUSG00000079056	Kcnip3	65597	-3.04109	-3.05605	1.821	0.000146108	0.00520379
ENSMUSG00000020377	Ltc4s	2156	-3.31135	-3.33029	1.74948	0.000147096	0.00521727
ENSMUSG00000021136	Smoc1	159607	1.64307	1.6438	4.5875	0.000147268	0.00521727
ENSMUSG00000022221	Ripk3	3871	-6.94414	-1.44269e+08	-0.606369	0.000150638	0.00531716
ENSMUSG00000027070	Lrp2	161726	-2.31071	-2.31274	3.87504	0.000150884	0.00531716
ENSMUSG00000067158	Col4a4	138427	-5.02668	-5.27139	0.0482084	0.000151477	0.00532401
ENSMUSG00000027661	Slc2a10	16131	-3.20424	-3.2132	2.67895	0.000153116	0.0053675
ENSMUSG00000020728	Cep112	435424	-7.02908	-1.44269e+08	-0.534366	0.000153663	0.00537259
ENSMUSG00000032846	Zswim6	165447	-5.68248	-5.92977	0.629008	0.000154435	0.00538547
ENSMUSG00000061232	H2-K1	4331	-5.10605	-5.13729	2.7862	0.000155413	0.00540547
ENSMUSG00000034910	Pygo1	26537	-6.10264	-6.563	0.272694	0.000160014	0.00555104
ENSMUSG00000040260	Daam2	108322	-3.73887	-3.75192	2.68601	0.000160663	0.00555909
ENSMUSG00000039349	C130074G19Rik	11293	-8.72922	-1.44269e+08	0.972182	0.000162474	0.00560723
ENSMUSG00000039903	Eva1c	78391	-4.27757	-4.33433	1.21361	0.000163085	0.00561381
ENSMUSG00000042359	Osbpl6	194140	2.67528	2.69388	1.15225	0.000166571	0.00571908
ENSMUSG00000053279	Aldh1a1	150751	-7.38942	-7.56111	2.72233	0.000167012	0.00571951
ENSMUSG00000039883	Lrrc17	32346	3.52642	3.54115	2.30335	0.000169649	0.00578986
ENSMUSG00000060429	Sntb1	270562	-7.14053	-1.44269e+08	-0.441948	0.000169933	0.00578986
ENSMUSG00000041180	Hectd2	66497	2.07086	2.07612	2.27229	0.000171843	0.00584004
ENSMUSG00000054418	2900041M22Rik	2611	6.92502	1.44269e+08	-0.594116	0.000172454	0.00584592
ENSMUSG00000027173	Depdc7	21095	1.77113	1.7733	3.1868	0.000173242	0.00585779
ENSMUSG00000092242	Gm20515	7725	8.1344	1.44269e+08	0.437174	0.000182288	0.00613319
ENSMUSG00000016179	Camk1g	23953	-7.68208	-1.44269e+08	0.018	0.000182306	0.00613319
ENSMUSG00000075402	Krt76	8570	4.35609	4.38739	2.07309	0.000184753	0.0061999
ENSMUSG00000032327	Stra6	90209	-2.9237	-2.93099	2.68754	0.000189805	0.00635348
ENSMUSG00000039699	Batf2	31494	2.92837	2.98502	-0.0305196	0.000191294	0.00638731
ENSMUSG00000052949	Rnf157	76680	-2.74996	-2.76032	2.03697	0.000195396	0.00650799
ENSMUSG00000073535	Gm5532	7048	4.85614	5.09241	-0.0591696	0.000198043	0.00656448
ENSMUSG00000038045	Sult6b1	23055	2.99943	3.02505	1.04146	0.000198075	0.00656448
ENSMUSG00000054034	Tceal5	2929	7.08076	1.44269e+08	-0.45894	0.000200726	0.00663588
ENSMUSG00000025161	Slc16a3	12389	-2.18904	-2.19127	3.61283	0.000203899	0.00672414
ENSMUSG00000028184	Adgrl2	174973	-2.94672	-2.9522	3.12006	0.000204954	0.00674227
ENSMUSG00000038587	Akap12	93091	1.71365	1.71384	6.57243	0.000205587	0.00674648
ENSMUSG00000033147	Slc22a15	68678	1.97935	1.98437	2.24199	0.000207534	0.00679369
ENSMUSG00000040046	Tph1	27897	2.26927	2.27703	1.93852	0.000209486	0.00684082
ENSMUSG00000022206	Npr3	67392	-3.53728	-3.54418	3.39229	0.000212438	0.00692029
ENSMUSG00000022762	Ncam2	426132	4.27851	4.37603	0.492219	0.000215235	0.00699005
ENSMUSG00000072419	Dppa2	15816	4.17454	4.33297	-0.1701	0.000215874	0.00699005
ENSMUSG00000061601	Pclo	348542	6.87724	1.44269e+08	-0.639813	0.000216149	0.00699005
ENSMUSG00000022528	Hes1	3413	-4.59362	-4.59512	6.63587	0.000218533	0.00705008
ENSMUSG00000063919	Srrm4	152543	5.21017	5.65226	-0.444039	0.000219727	0.0070715
ENSMUSG00000109602	Gm31597	8220	4.11218	4.2323	0.11041	0.000220677	0.00708501
ENSMUSG00000053414	Hunk	113541	-3.44745	-3.46124	2.34022	0.000221353	0.00708516
ENSMUSG00000115367	Gm33301	5496	7.03924	1.44269e+08	-0.499876	0.000221743	0.00708516
ENSMUSG00000069601	Ank3	628666	1.69541	1.6961	4.70754	0.000222842	0.00710329
ENSMUSG00000054256	Msi1	26100	-2.68508	-2.7157	0.506181	0.0002245	0.00713909
ENSMUSG00000059173	Pde1a	295006	4.94803	5.11009	0.461657	0.000225384	0.00715017
ENSMUSG00000014813	Stc1	12567	-9.55408	-1.44269e+08	1.7574	0.000227393	0.00719684
ENSMUSG00000037813	D630003M21Rik	46690	3.91588	3.97008	0.907535	0.000228025	0.00719976
ENSMUSG00000025150	Cbr2	2626	-3.9121	-3.93424	2.13695	0.000229813	0.007223
ENSMUSG00000025783	4930412O13Rik	2670	-3.84297	-3.94192	0.0791669	0.000229882	0.007223
ENSMUSG00000051331	Cacna1c	609651	-2.92513	-2.9282	3.93978	0.000230383	0.007223
ENSMUSG00000025491	Ifitm1	2605	3.81116	3.82018	3.27831	0.000231341	0.00723605
ENSMUSG00000091971	Hspa1a	2967	3.41701	3.56936	-0.751233	0.000232308	0.00724931
ENSMUSG00000029838	Ptn	95292	5.05071	5.05285	6.57602	0.000235811	0.00734147
ENSMUSG00000027171	Prrg4	19136	-6.66003	-1.44269e+08	-0.82665	0.000239069	0.00742559
ENSMUSG00000035864	Syt1	513333	4.17277	4.22217	1.28749	0.000241119	0.00747188
ENSMUSG00000033715	Akr1c14	41678	-4.0487	-4.07314	2.12436	0.00024325	0.00752047
ENSMUSG00000033295	Ptprf	83193	-1.8396	-1.84136	3.55879	0.000245682	0.0075659
ENSMUSG00000028558	Calr4	20087	4.6257	4.78641	0.196937	0.000245852	0.0075659
ENSMUSG00000051242	Pcdhb9	3055	-4.12752	-4.25169	0.0664738	0.000250086	0.00766572
ENSMUSG00000022665	Ccdc80	34676	2.55977	2.56004	7.05093	0.000250304	0.00766572
ENSMUSG00000040495	Chrm4	1440	-7.93071	-1.44269e+08	0.241725	0.000251179	0.00766572
ENSMUSG00000058897	Col25a1	468377	-5.22856	-5.30289	1.7785	0.000251391	0.00766572
ENSMUSG00000022824	Muc13	25898	-4.06142	-4.10064	1.47001	0.000258654	0.0078692
ENSMUSG00000048502	Duxbl1	11512	3.45604	3.52344	0.213286	0.000261117	0.00792607
ENSMUSG00000017446	C1qtnf1	21761	-2.68632	-2.68715	5.56268	0.000265407	0.00803803
ENSMUSG00000000197	Nalcn	350511	-7.29212	-1.44269e+08	-0.313898	0.000267533	0.00808409
ENSMUSG00000028977	Casz1	150461	2.36215	2.3792	0.972045	0.000271306	0.00817961
ENSMUSG00000114585	Gm32401	57486	2.3951	2.41225	0.990952	0.000278437	0.0083757
ENSMUSG00000029231	Pdgfra	45924	-3.46091	-3.46143	7.01371	0.000280039	0.00840494
ENSMUSG00000019762	Iyd	14638	3.24446	3.33664	-0.327154	0.000281977	0.00844415
ENSMUSG00000114541	Gm29680	37926	3.95419	4.11126	-0.333997	0.000288615	0.00862359
ENSMUSG00000024041	Cryaa	3927	5.13712	5.57866	-0.491793	0.000291498	0.00867225
ENSMUSG00000050751	Pgbd5	70610	-8.28087	-1.44269e+08	0.556508	0.000291801	0.00867225
ENSMUSG00000043102	Qrfp	4415	4.92027	5.08219	0.476676	0.000292192	0.00867225
ENSMUSG00000058589	Anks1b	1099792	3.19368	3.25176	0.191705	0.000298249	0.00881688
ENSMUSG00000032561	Acpp	49498	6.68199	1.44269e+08	-0.780882	0.000298385	0.00881688
ENSMUSG00000024053	Emilin2	59807	-4.53068	-4.58238	1.57337	0.000299265	0.00882337
ENSMUSG00000074758	Gm5535	109176	-3.94976	-3.97296	2.10498	0.000301124	0.00885861
ENSMUSG00000085399	Foxd2os	12741	-6.71008	-1.44269e+08	-0.793969	0.000303335	0.00890403
ENSMUSG00000017057	Il13ra1	59150	2.18603	2.18699	4.82012	0.000307902	0.00901827
ENSMUSG00000020583	Matn3	24100	2.51463	2.5268	1.57212	0.000310349	0.00906317
ENSMUSG00000027335	Adra1d	16434	-4.42953	-4.5946	-0.0266138	0.000310792	0.00906317
ENSMUSG00000029359	Tesc	34136	-2.91358	-2.95628	0.293299	0.000312144	0.00908278
ENSMUSG00000036545	Adamts2	205490	-5.02187	-5.14949	0.826163	0.000323168	0.00938312
ENSMUSG00000062991	Nrg1	1070247	-4.45371	-4.57945	0.321669	0.000327859	0.00948527
ENSMUSG00000022146	Osmr	61393	1.65678	1.65739	4.85984	0.000328107	0.00948527
ENSMUSG00000034613	Ppm1h	267034	-2.18675	-2.19365	2.01725	0.000339634	0.00979729
ENSMUSG00000086748	Gm13261	34759	7.57884	1.44269e+08	-0.0383481	0.00034615	0.00996374
ENSMUSG00000087400	Gm15270	47944	6.5864	1.44269e+08	-0.862756	0.000348028	0.00999625
ENSMUSG00000095493	A630023A22Rik	51629	5.06935	5.5105	-0.526854	0.000353621	0.0101351
ENSMUSG00000027273	Snap25	68976	6.54769	1.44269e+08	-0.892646	0.000359088	0.0102698
ENSMUSG00000017400	Stac2	16840	-4.09501	-4.25808	-0.286564	0.000361733	0.0103143
ENSMUSG00000049134	Nrap	70003	4.33498	4.45613	0.284145	0.00036219	0.0103143
ENSMUSG00000020044	Timp3	49135	-3.34837	-3.35557	3.12898	0.000364349	0.0103537
ENSMUSG00000021638	Ocln	56212	2.98692	3.01972	0.684835	0.000367041	0.0104081
ENSMUSG00000037990	Sh3rf3	325558	-4.64483	-5.09496	-0.918564	0.000370109	0.0104728
ENSMUSG00000087264	Gad1os	73418	-5.44329	-5.90026	-0.274454	0.000371966	0.0105031
ENSMUSG00000091243	Vgll3	51112	-1.78874	-1.78983	4.17552	0.000373761	0.0105315
ENSMUSG00000023885	Thbs2	28736	-1.53198	-1.53205	7.94692	0.000377067	0.0106023
ENSMUSG00000027820	Mme	144494	-10.1978	-1.44269e+08	2.38159	0.000380438	0.0106746
ENSMUSG00000031451	Gas6	29117	-5.21972	-5.2944	1.70881	0.00038378	0.0107458
ENSMUSG00000057280	Musk	88344	6.98994	1.44269e+08	-0.544137	0.00038483	0.0107527
ENSMUSG00000019997	Ccn2	3242	2.44017	2.45076	1.68479	0.00039907	0.0111273
ENSMUSG00000033102	Cdc14b	86023	-1.91905	-1.92274	2.58682	0.000402715	0.0112056
ENSMUSG00000073408	Mucl3	7944	3.69416	3.74775	0.726212	0.000405944	0.0112719
ENSMUSG00000037922	Bank1	272704	3.08309	3.1485	-0.0831699	0.000406957	0.0112766
ENSMUSG00000051323	Pcdh19	106128	-7.68067	-1.44269e+08	-0.00143502	0.00041293	0.0114184
ENSMUSG00000000392	Fap	73133	-4.88584	-4.98839	1.00235	0.000419025	0.011563
ENSMUSG00000106847	Peg13	4725	-4.80864	-5.05226	-0.144039	0.000428408	0.0117976
ENSMUSG00000052632	Asap2	279713	-4.51068	-4.67624	0.0343132	0.000430734	0.0118372
ENSMUSG00000062077	Trim54	20919	6.64554	1.44269e+08	-0.809166	0.000435808	0.0119521
ENSMUSG00000097448	Platr22	29932	4.70655	5.14436	-0.809392	0.000445074	0.0121812
ENSMUSG00000045658	Pid1	327885	-1.79943	-1.8002	4.69569	0.000457333	0.0124911
ENSMUSG00000050737	Ptges	40393	-2.74709	-2.77803	0.543186	0.000465591	0.012671
ENSMUSG00000002908	Kcnn1	21210	-2.86537	-2.87786	1.88267	0.000465818	0.012671
ENSMUSG00000028555	Ttc39a	38123	-3.15926	-3.25383	-0.463521	0.000467351	0.0126869
ENSMUSG00000026664	Phyh	19712	-4.57336	-4.65876	0.90709	0.000470144	0.0127314
ENSMUSG00000064339	mt-Rnr2	1582	-1.74502	-1.74504	9.91826	0.000470898	0.0127314
ENSMUSG00000069114	Zbtb10	34732	-1.61481	-1.61595	3.91412	0.000475148	0.0127906
ENSMUSG00000057132	Rpgrip1	52843	4.54645	4.78081	-0.3179	0.000475676	0.0127906
ENSMUSG00000010021	Kif19a	25352	6.68092	1.44269e+08	-0.781223	0.00047596	0.0127906
ENSMUSG00000035105	Egln3	24880	1.8348	1.83514	5.89781	0.00047971	0.0128655
ENSMUSG00000010796	Asz1	58098	6.89624	1.44269e+08	-0.63412	0.000482026	0.0129017
ENSMUSG00000022358	Fbxo32	39054	-1.86715	-1.86777	5.08746	0.000513954	0.0137287
ENSMUSG00000038776	Ephx1	44695	-4.89424	-4.90828	3.70519	0.000516729	0.0137571
ENSMUSG00000022488	Nckap1l	45017	2.46117	2.46832	2.24772	0.000517443	0.0137571
ENSMUSG00000044043	Pcdhb14	8695	-3.90181	-3.93568	1.52711	0.000518107	0.0137571
ENSMUSG00000021662	Arhgef28	306971	2.32707	2.34166	1.15246	0.000524083	0.0138882
ENSMUSG00000020681	Ace	22020	-5.36899	-5.4726	1.43555	0.000526636	0.0139282
ENSMUSG00000100437	Gm29152	2822	4.47834	4.91345	-0.98924	0.000533256	0.0140754
ENSMUSG00000026547	Tagln2	7334	2.12584	2.1264	5.52271	0.000538878	0.0141831
ENSMUSG00000041695	Kcnj2	10658	-8.09455	-1.44269e+08	0.374991	0.00053987	0.0141831
ENSMUSG00000022357	Klhl38	9597	-1.952	-1.9594	1.66299	0.000540521	0.0141831
ENSMUSG00000038781	Stap2	8508	2.86485	2.88766	1.06026	0.000558935	0.0146133
ENSMUSG00000085183	Wincr1	34307	-1.65663	-1.65796	3.73435	0.000559106	0.0146133
ENSMUSG00000048249	Crebrf	60986	-1.61581	-1.61638	4.88964	0.0005677	0.014809
ENSMUSG00000035929	H2-Q4	5674	-4.65333	-4.89594	-0.287584	0.000571006	0.0148662
ENSMUSG00000095180	Rhox5	5676	2.33422	2.35438	0.722399	0.000579652	0.0150619
ENSMUSG00000031075	Ano1	163426	4.60133	4.83611	-0.264077	0.000591129	0.0153063
ENSMUSG00000030345	Dyrk4	45820	2.42633	2.42797	4.32773	0.000591349	0.0153063
ENSMUSG00000073491	Ifi213	32992	3.85754	3.90183	1.13821	0.000598859	0.0154707
ENSMUSG00000043613	Mmp3	10154	-7.77551	-1.44269e+08	0.0899367	0.000605751	0.0156186
ENSMUSG00000057315	Arhgap24	416547	3.06354	3.0991	0.676847	0.000609427	0.0156831
ENSMUSG00000026303	Mlph	36058	2.43232	2.43699	2.82178	0.00061226	0.0157016
ENSMUSG00000052334	1700024B05Rik	59827	2.23781	2.24975	1.31391	0.000612888	0.0157016
ENSMUSG00000056427	Slit3	587284	-4.04659	-4.06262	2.71991	0.000613673	0.0157016
ENSMUSG00000000142	Axin2	30435	-2.15168	-2.15283	4.51222	0.000618329	0.0157905
ENSMUSG00000032348	Gsta4	26576	-1.95196	-1.95716	2.1453	0.000638346	0.0162705
ENSMUSG00000052726	Kcnt2	365910	-2.44988	-2.45791	2.06921	0.000643458	0.0163696
ENSMUSG00000027219	Slc28a2	34661	-2.15673	-2.16703	1.44096	0.000648157	0.0164578
ENSMUSG00000037892	Pcdh18	14030	-2.46436	-2.46598	4.36725	0.000661834	0.0167732
ENSMUSG00000086765	Gm11827	4194	4.44577	4.6795	-0.369327	0.00067102	0.0169738
ENSMUSG00000084844	Hoxb3os	11715	2.43897	2.44907	1.7522	0.000677202	0.0170978
ENSMUSG00000051506	Wdfy4	225962	-2.64946	-2.69089	0.0739975	0.000679906	0.0171336
ENSMUSG00000021186	Fbln5	72491	-4.22844	-4.32902	0.382085	0.00068708	0.0172496
ENSMUSG00000040152	Thbs1	15258	-3.25563	-3.2557	9.73338	0.000687642	0.0172496
ENSMUSG00000009687	Fxyd5	9760	1.63819	1.63863	5.32364	0.000688384	0.0172496
ENSMUSG00000031994	Adamts8	21277	-8.73262	-1.44269e+08	0.97765	0.000696384	0.0174128
ENSMUSG00000025207	Sema4g	14297	-3.26674	-3.28911	1.46285	0.000698561	0.0174128
ENSMUSG00000085682	Gm14267	22338	3.04016	3.13076	-0.479088	0.000698805	0.0174128
ENSMUSG00000021403	Serpinb9b	14469	-2.14653	-2.14746	4.80846	0.000705754	0.0175436
ENSMUSG00000009614	Sardh	59945	-1.73157	-1.73212	5.10049	0.000706683	0.0175436
ENSMUSG00000092225	Gm2381	50406	2.09147	2.0943	3.1641	0.00073125	0.0181198
ENSMUSG00000000296	Tpd52l1	113583	-4.81181	-5.05544	-0.143068	0.000738172	0.0182575
ENSMUSG00000020312	Shc2	19868	-1.86199	-1.86616	2.35205	0.000745109	0.018395
ENSMUSG00000053175	Bcl3	14309	1.75619	1.75948	2.57854	0.000748958	0.0184559
ENSMUSG00000030220	Arhgdib	18245	2.14987	2.15076	4.884	0.000752861	0.0185179
ENSMUSG00000040118	Cacna2d1	439821	-2.9294	-3.02194	-0.632621	0.000754323	0.0185197
ENSMUSG00000029544	Cabp1	25693	2.17895	2.18202	3.14988	0.000760379	0.0186342
ENSMUSG00000020717	Pecam1	96412	-1.8767	-1.87691	6.67072	0.000766488	0.0187495
ENSMUSG00000022353	Mtss1	140772	-1.87893	-1.87929	5.87593	0.000776614	0.0189625
ENSMUSG00000025255	Zfhx4	197332	-2.75639	-2.77037	1.6538	0.000797721	0.0194423
ENSMUSG00000024302	Dtna	244581	-1.68333	-1.68394	4.87661	0.00080015	0.0194518
ENSMUSG00000029126	Nsg1	22716	-4.34595	-4.41894	0.901621	0.000801027	0.0194518
ENSMUSG00000022203	Efs	9592	-1.82093	-1.82168	4.76163	0.000819713	0.0198695
ENSMUSG00000036334	Igsf10	27660	3.33278	3.36251	1.15769	0.000829339	0.0200664
ENSMUSG00000019785	Clvs2	112484	-2.38998	-2.39168	4.20925	0.000837077	0.0202105
ENSMUSG00000121409	NA	62844	3.32686	3.37389	0.58447	0.000838322	0.0202105
ENSMUSG00000031837	Necab2	25922	-8.12743	-1.44269e+08	0.422022	0.000841753	0.0202567
ENSMUSG00000026883	Dab2ip	172729	-1.43904	-1.43932	5.67027	0.000850712	0.0204354
ENSMUSG00000029417	Cxcl9	6733	4.31459	4.54739	-0.482024	0.000860336	0.0206295
ENSMUSG00000106293	Gm42476	821	-4.14011	-4.37875	-0.686308	0.000865794	0.0207232
ENSMUSG00000047420	Fam180a	13474	-2.15247	-2.15387	4.2349	0.000868904	0.0207604
ENSMUSG00000029576	Radil	66260	-4.3018	-4.42683	0.201637	0.00088407	0.0210851
ENSMUSG00000044022	Pcdhb21	4705	-2.85222	-2.86315	2.06911	0.000885851	0.0210899
ENSMUSG00000037846	Rtkn2	80171	1.87635	1.87742	4.32827	0.000901096	0.0214147
ENSMUSG00000007682	Dio2	14487	-3.54546	-3.54597	7.14257	0.000909611	0.0215786
ENSMUSG00000071047	Ces1a	27979	-2.81553	-2.90695	-0.71232	0.000913584	0.0216344
ENSMUSG00000039377	Hlx	5480	1.59603	1.59729	3.74752	0.000928177	0.0219411
ENSMUSG00000040265	Dnm3	495582	-1.62095	-1.62221	3.77468	0.000934549	0.0220527
ENSMUSG00000003051	Elf3	4994	3.04671	3.13736	-0.479762	0.000939172	0.0221227
ENSMUSG00000020303	Stc2	12768	-8.38355	-1.44269e+08	0.63636	0.000961293	0.0226039
ENSMUSG00000024747	Aldh1a7	34610	-8.99047	-1.44269e+08	1.22435	0.000968715	0.0227171
ENSMUSG00000023033	Scn8a	176081	-8.08906	-1.44269e+08	0.385904	0.000969508	0.0227171
ENSMUSG00000025856	Pdgfa	21357	1.40987	1.41022	5.36572	0.000986947	0.0230852
ENSMUSG00000003271	Sult2b1	54687	2.26245	2.26965	2.05208	0.000990748	0.0231336
ENSMUSG00000020053	Igf1	78778	-5.03169	-5.04777	3.68167	0.000997785	0.0232573
ENSMUSG00000084807	Gm13073	691	3.35102	3.39386	0.714645	0.00101319	0.0235752
ENSMUSG00000044162	Tnip3	108728	-2.95311	-2.95751	3.4398	0.00101727	0.023629
ENSMUSG00000000126	Wnt9a	26625	-3.4541	-3.5086	0.480213	0.00102649	0.0238017
ENSMUSG00000028565	Nfia	346141	-1.65563	-1.65729	3.42979	0.00103741	0.0240132
ENSMUSG00000024621	Csf1r	31552	2.98804	3.00994	1.24108	0.00105136	0.024294
ENSMUSG00000028339	Col15a1	105007	-3.73969	-3.74803	3.33121	0.00107238	0.024737
ENSMUSG00000074037	Mc1r	3638	-3.35156	-3.44761	-0.314241	0.00108079	0.024888
ENSMUSG00000062310	Glrp1	10196	2.53813	2.54037	3.99301	0.00108393	0.0249174
ENSMUSG00000042367	Gjb3	5610	-2.39528	-2.40694	1.51432	0.00109134	0.0250445
ENSMUSG00000043719	Col6a6	140352	-10.4743	-1.44269e+08	2.65265	0.00110024	0.0251761
ENSMUSG00000104225	4930517L18Rik	861	4.26779	4.50016	-0.523371	0.00110084	0.0251761
ENSMUSG00000037060	Cavin3	2218	1.58492	1.5853	5.45435	0.00112517	0.0256885
ENSMUSG00000022197	Pdzd2	380214	2.80901	2.88306	-0.450004	0.00113136	0.0257858
ENSMUSG00000120898	NA	5440	2.85277	2.9415	-0.6364	0.00115413	0.02626
ENSMUSG00000021127	Zfp36l1	5260	-2.55285	-2.5531	7.16474	0.00115888	0.0263231
ENSMUSG00000000093	Tbx2	9398	-3.59258	-3.67434	0.0967787	0.0011738	0.0265632
ENSMUSG00000023913	Pla2g7	44104	2.84572	2.86637	1.20552	0.00117387	0.0265632
ENSMUSG00000040093	Bmf	20931	-2.22576	-2.22719	4.28771	0.00117542	0.0265632
ENSMUSG00000031383	Dusp9	4096	1.62287	1.6234	5.01506	0.00121833	0.0274865
ENSMUSG00000047963	Stbd1	3539	2.02027	2.02137	4.44276	0.00122716	0.0276391
ENSMUSG00000054555	Adam12	348948	-7.37656	-1.44269e+08	-0.237397	0.00124503	0.0279943
ENSMUSG00000018427	Ypel2	57283	-1.95342	-1.95599	3.16025	0.00126737	0.0284487
ENSMUSG00000038042	Ptpdc1	47793	-4.3416	-4.46685	0.217853	0.00127641	0.0286036
ENSMUSG00000037235	Mxd4	13838	-1.99471	-1.99547	4.94066	0.0012899	0.0288576
ENSMUSG00000037370	Enpp1	74246	-9.40731	-1.44269e+08	1.62176	0.00129614	0.0289188
ENSMUSG00000054196	Cthrc1	10190	-8.72758	-1.44269e+08	0.975397	0.00129697	0.0289188
ENSMUSG00000000530	Acvrl1	16815	3.44212	3.47196	1.27224	0.00130267	0.0289975
ENSMUSG00000022790	Igsf11	134489	-4.12	-4.19235	0.696384	0.00130608	0.0290249
ENSMUSG00000020437	Myo1g	14418	3.32667	3.36964	0.66763	0.00131049	0.0290747
ENSMUSG00000020423	Btg2	3951	-2.24053	-2.24303	3.50047	0.00131869	0.0292079
ENSMUSG00000068551	Zfp467	18129	-3.18108	-3.23445	0.27174	0.00132297	0.0292538
ENSMUSG00000037447	Arid5a	16297	2.30877	2.30941	5.55845	0.00132514	0.0292538
ENSMUSG00000055044	Pdlim1	50670	1.64047	1.64357	2.5258	0.00134234	0.0295791
ENSMUSG00000026360	Rgs2	4824	-3.94078	-4.06401	-0.117701	0.0013443	0.0295791
ENSMUSG00000053395	Cacng8	24966	2.05275	2.06365	1.25788	0.00135134	0.0296745
ENSMUSG00000041774	Ydjc	16081	-2.72574	-2.74691	1.0168	0.00135308	0.0296745
ENSMUSG00000016194	Hsd11b1	42442	-3.87113	-3.88091	3.24413	0.00137045	0.030006
ENSMUSG00000078995	Zfp456	13698	2.52738	2.56679	0.04139	0.00139346	0.03046
ENSMUSG00000026211	Obsl1	27143	-2.07581	-2.08176	2.09016	0.00141175	0.0308094
ENSMUSG00000068323	Slc4a5	85118	3.44393	3.53736	-0.180657	0.0014147	0.0308233
ENSMUSG00000052713	Zfp608	104508	-2.32485	-2.33018	2.53056	0.00141885	0.0308634
ENSMUSG00000046634	Pkd1l1	146559	2.76723	2.83067	-0.306447	0.00142516	0.0309504
ENSMUSG00000087266	Gm15991	21283	-3.50576	-3.66406	-0.742157	0.00145558	0.0315596
ENSMUSG00000003477	Inmt	4418	-11.8512	-1.44269e+08	4.00563	0.00148116	0.0320623
ENSMUSG00000047033	Pcdhb15	2801	-1.84593	-1.8502	2.30582	0.00148814	0.0321612
ENSMUSG00000028517	Plpp3	75418	-2.06343	-2.06918	2.13254	0.00149481	0.0322375
ENSMUSG00000032591	Mst1	4568	3.52205	3.53572	2.44938	0.0014965	0.0322375
ENSMUSG00000020229	Slc5a4a	41815	3.29004	3.3675	-0.0948427	0.0015007	0.0322701
ENSMUSG00000101581	C430002N11Rik	16916	-3.3866	-3.48291	-0.296695	0.00150506	0.0322701
ENSMUSG00000036446	Lum	7576	-11.8021	-1.44269e+08	3.95715	0.00150526	0.0322701
ENSMUSG00000037686	Aspg	20881	-3.28537	-3.30112	2.00944	0.00150847	0.0322871
ENSMUSG00000064125	Prr36	7917	3.34628	3.49787	-0.807374	0.0015287	0.0326678
ENSMUSG00000044337	Ackr3	12772	1.54402	1.54492	4.16147	0.00153256	0.0326978
ENSMUSG00000113769	5033406O09Rik	2494	2.22809	2.237	1.69154	0.00154169	0.0328403
ENSMUSG00000020682	Mmp28	22304	1.76447	1.76506	5.03318	0.00155033	0.0329716
ENSMUSG00000097960	A330074K22Rik	23797	-4.38434	-4.5098	0.265291	0.00159096	0.033782
ENSMUSG00000032122	Slc37a2	28154	1.81389	1.82041	1.69719	0.00165695	0.0350757
ENSMUSG00000086416	Gm14002	9984	-2.68627	-2.72783	0.136532	0.00165714	0.0350757
ENSMUSG00000060572	Mfap2	5567	-1.83651	-1.83792	3.88027	0.00169345	0.0357539
ENSMUSG00000034771	Tle2	16285	-2.47075	-2.47358	3.57682	0.00169453	0.0357539
ENSMUSG00000046807	Lrrc75b	10208	-2.81231	-2.84814	0.438461	0.00171454	0.035982
ENSMUSG00000038059	Smim3	27797	-3.93761	-4.0996	-0.437817	0.00171524	0.035982
ENSMUSG00000026167	Wnt10a	12664	1.57377	1.57409	5.66913	0.00171722	0.035982
ENSMUSG00000021684	Pde8b	225883	3.85467	4.0831	-0.836624	0.00171788	0.035982
ENSMUSG00000014603	Alx3	10746	-3.59365	-3.65548	0.442487	0.00171882	0.035982
ENSMUSG00000026833	Olfm1	37745	-2.95721	-3.03496	-0.392647	0.00173536	0.0362715
ENSMUSG00000044626	Liph	41847	1.87158	1.88054	1.31253	0.00173931	0.0362972
ENSMUSG00000025993	Slc40a1	18456	-2.18177	-2.18212	6.25058	0.00178698	0.0372339
ENSMUSG00000031880	Rrad	3258	1.68617	1.68908	2.67401	0.00180041	0.0374552
ENSMUSG00000029378	Areg	8834	2.11229	2.12589	1.0034	0.00181914	0.0377861
ENSMUSG00000021010	Npas3	824019	1.88228	1.88864	1.8028	0.00182298	0.0378071
ENSMUSG00000006457	Actn3	16694	2.16113	2.17972	0.645858	0.00183368	0.0379699
ENSMUSG00000030074	Gxylt2	106180	-1.7893	-1.78983	5.20587	0.00187281	0.0387202
ENSMUSG00000058656	Samd12	448728	2.51841	2.54405	0.589436	0.00187993	0.0388074
ENSMUSG00000049907	Rasl11b	4196	-3.213	-3.21549	4.52871	0.00189219	0.0390002
ENSMUSG00000023805	Synj2	103011	1.33669	1.33697	5.53354	0.00189791	0.0390578
ENSMUSG00000054626	Xlr	20589	-3.73945	-3.82178	0.236856	0.00191088	0.0392641
ENSMUSG00000003545	Fosb	7356	-1.9486	-1.95179	2.83498	0.0019193	0.0393766
ENSMUSG00000064343	mt-Tq	71	-2.4007	-2.4192	0.874505	0.00192937	0.0395224
ENSMUSG00000030000	Add2	95729	2.59953	2.65397	-0.278224	0.00194458	0.0397731
ENSMUSG00000043313	Pcdhb19	7138	-2.67796	-2.69889	1.01137	0.00196024	0.040032
ENSMUSG00000095440	Fignl2	28374	-7.20951	-1.44269e+08	-0.379464	0.00199372	0.0406537
ENSMUSG00000050295	Foxc1	5844	-2.01284	-2.01372	4.75543	0.00200456	0.0408124
ENSMUSG00000034714	Ttyh2	45547	-2.01551	-2.01583	6.23281	0.00201671	0.0409972
ENSMUSG00000001240	Ramp2	13519	-1.75403	-1.75776	2.40151	0.00202285	0.0410595
ENSMUSG00000014599	Csf1	19422	1.56002	1.56008	7.87289	0.00206251	0.041801
ENSMUSG00000026259	Ngef	97037	2.77652	2.82609	-0.00511715	0.0020737	0.0419642
ENSMUSG00000031129	Slc9a9	560537	2.26121	2.2743	1.22935	0.00207805	0.0419885
ENSMUSG00000114442	F630042J09Rik	4785	2.72843	2.79157	-0.324507	0.00209716	0.0423107
ENSMUSG00000100816	Gm28321	2327	2.38365	2.39953	1.07871	0.00213957	0.0431013
ENSMUSG00000024610	Cd74	8805	-2.74209	-2.74275	5.94548	0.00215391	0.0433248
ENSMUSG00000029108	Pcdh7	415264	-1.34559	-1.34589	5.48478	0.00215748	0.0433313
ENSMUSG00000040430	Pitpnc1	262808	-1.81546	-1.81592	5.42833	0.00216456	0.0434083
ENSMUSG00000020034	Tcp11l2	37734	-1.7887	-1.78951	4.61265	0.00225426	0.0450851
ENSMUSG00000020023	Tmcc3	279008	1.90896	1.91459	2.00108	0.00225493	0.0450851
ENSMUSG00000038486	Sv2a	14371	-2.01758	-2.02383	1.97544	0.00226905	0.0452997
ENSMUSG00000028214	Gem	10296	-3.7872	-3.90953	-0.234917	0.00227258	0.0453024
ENSMUSG00000045062	Pcdhb7	3501	-3.31953	-3.3886	0.0766629	0.00227993	0.0453812
ENSMUSG00000107709	9430018G01Rik	6340	3.12299	3.13577	2.1019	0.00231342	0.0459792
ENSMUSG00000064371	mt-Tt	67	-2.02136	-2.03323	1.07198	0.00233486	0.0463364
ENSMUSG00000067924	Rtl8b	1232	-3.79462	-3.95555	-0.537836	0.00234559	0.0464802
ENSMUSG00000039155	Cdh26	56836	-8.19305	-1.44269e+08	0.4818	0.00235309	0.0465598
ENSMUSG00000039058	Ak5	205546	-2.14619	-2.15153	2.33715	0.00237797	0.0469437
ENSMUSG00000031561	Tenm3	616270	-1.74629	-1.74639	7.5837	0.00238198	0.0469437
ENSMUSG00000024339	Tap2	12795	-1.92214	-1.92667	2.30583	0.00238304	0.0469437
ENSMUSG00000086283	2810433D01Rik	4621	-2.50619	-2.55088	-0.142405	0.00238884	0.0469886
ENSMUSG00000051373	Plpp7	15293	1.57681	1.5797	2.54018	0.00243889	0.0479027
ENSMUSG00000047180	Neurl3	10083	3.20666	3.24274	0.770296	0.00247649	0.0485698
ENSMUSG00000007655	Cav1	35118	2.01701	2.01718	7.10528	0.00249617	0.0488501
ENSMUSG00000079017	Ifi27l2a	1514	-3.54351	-3.5698	1.53475	0.0024981	0.0488501
ENSMUSG00000063687	Pcdhb5	3535	-1.64214	-1.64432	3.01636	0.00252494	0.0493028
ENSMUSG00000006344	Ggt5	27861	-6.13335	-6.19966	2.77733	0.00254118	0.0495179
ENSMUSG00000112527	Gm35696	19976	3.37287	3.48832	-0.480198	0.00254337	0.0495179
ENSMUSG00000020332	Meikin	56139	3.40629	3.49963	-0.196735	0.00261321	0.0508036
ENSMUSG00000023224	Serping1	10058	2.57793	2.58877	1.77932	0.00264581	0.0513625
ENSMUSG00000004655	Aqp1	12124	1.81279	1.81304	6.34774	0.00269388	0.0522199
ENSMUSG00000030218	Mgp	3389	-2.69744	-2.70605	2.24297	0.00270725	0.052403
ENSMUSG00000019647	Sema6a	133273	-3.39174	-3.43632	0.688779	0.00276869	0.0535147
ENSMUSG00000083668	Gm5648	1587	2.51507	2.55119	0.132624	0.0027748	0.0535552
ENSMUSG00000032377	Plscr4	35084	-1.65885	-1.65953	4.70759	0.00279643	0.0538948
ENSMUSG00000043631	Ecm2	27980	-3.22301	-3.30268	-0.194967	0.0029319	0.0564243
ENSMUSG00000026308	Klhl30	11401	-1.95178	-1.95482	2.8989	0.0029398	0.0564949
ENSMUSG00000095071	AF067061	1404	-2.92455	-2.96379	0.427458	0.00294741	0.0565598
ENSMUSG00000031722	Hp	4045	-5.15141	-5.17185	3.45786	0.00295809	0.0566833
ENSMUSG00000030688	Stard10	29541	-1.96129	-1.9632	3.57674	0.00297531	0.0568935
ENSMUSG00000028159	Dapp1	50539	1.5222	1.52363	3.48294	0.00297758	0.0568935
ENSMUSG00000023918	Adgrf4	35394	2.33068	2.33167	4.93873	0.00299094	0.0570672
ENSMUSG00000022367	Has2	28913	1.97158	1.97312	3.89772	0.00301564	0.0574564
ENSMUSG00000028064	Sema4a	25224	1.53908	1.54187	2.55081	0.00305494	0.0581222
ENSMUSG00000028195	Ccn1	3006	-1.94629	-1.94648	6.91188	0.00306614	0.0582523
ENSMUSG00000032313	Tmem266	111433	-3.30412	-3.32739	1.4826	0.00310393	0.0588865
ENSMUSG00000030748	Il4ra	27355	-5.45545	-5.46537	4.79311	0.0031723	0.0600982
ENSMUSG00000034255	Arhgap27	32196	-1.86791	-1.8744	1.7395	0.0031925	0.0603953
ENSMUSG00000090799	Klhl33	8926	1.66734	1.67086	2.37174	0.0032378	0.0610954
ENSMUSG00000028698	Pik3r3	81439	-1.71171	-1.71323	3.62844	0.00323866	0.0610954
ENSMUSG00000073000	Gm10451	6840	-2.29226	-2.30721	1.07603	0.00324779	0.0611813
ENSMUSG00000029659	Medag	19975	-4.00401	-4.03811	1.61447	0.00333519	0.0627392
ENSMUSG00000020176	Grb10	108176	-3.49679	-3.55155	0.504494	0.00334505	0.0628362
ENSMUSG00000026065	Slc9a4	50645	3.34286	3.40977	0.163522	0.00335428	0.062921
ENSMUSG00000049709	Nlrp10	8327	1.96505	1.97512	1.28055	0.00336571	0.0630468
ENSMUSG00000026932	Nacc2	67686	-1.58301	-1.58484	3.18661	0.00338853	0.0633258
ENSMUSG00000020601	Trib2	25196	1.37239	1.37294	4.65262	0.00339008	0.0633258
ENSMUSG00000044177	Wfikkn2	10050	2.58397	2.63241	-0.133763	0.0034243	0.0638756
ENSMUSG00000053297	AI854703	6926	2.357	2.38956	0.130982	0.00343222	0.063934
ENSMUSG00000025175	Fn3k	15579	-2.87216	-2.89568	1.05071	0.00345419	0.0642537
ENSMUSG00000032735	Ablim3	112433	-2.67428	-2.70953	0.315132	0.00348107	0.0646636
ENSMUSG00000087006	Gm13889	1392	-3.14125	-3.22043	-0.27781	0.00351068	0.0651232
ENSMUSG00000025867	Cplx2	12569	-2.19267	-2.20158	1.67513	0.00352154	0.0652339
ENSMUSG00000070476	Fam217b	9905	-1.70516	-1.7073	3.13337	0.00352656	0.0652364
ENSMUSG00000026928	Card9	8743	2.18925	2.1942	2.48922	0.0035794	0.0661224
ENSMUSG00000007594	Hapln4	7406	-1.49186	-1.4923	5.13	0.00366828	0.0676706
ENSMUSG00000017344	Vtn	3234	-6.66602	-6.77103	2.68499	0.00369684	0.0681035
ENSMUSG00000034687	Fras1	410774	-3.00365	-3.02753	1.1533	0.00376103	0.0691906
ENSMUSG00000067586	S1pr3	14159	-3.4954	-3.54044	0.740301	0.00389612	0.0715771
ENSMUSG00000022371	Col14a1	213054	-2.31206	-2.31681	2.65745	0.00390748	0.0715973
ENSMUSG00000049985	Ankrd55	95552	2.31995	2.36644	-0.341586	0.00390794	0.0715973
ENSMUSG00000073988	Ttpa	22848	-1.82386	-1.83223	1.35194	0.00392404	0.0717937
ENSMUSG00000024164	C3	24167	-1.96565	-1.96797	3.29541	0.00395013	0.0721723
ENSMUSG00000009633	G0s2	1057	2.64186	2.66306	0.948352	0.00398032	0.0726246
ENSMUSG00000026315	Serpinb8	20479	-2.37006	-2.39202	0.628716	0.00407053	0.0741692
ENSMUSG00000037224	Zfyve28	93557	2.55267	2.60683	-0.304543	0.00408173	0.0742719
ENSMUSG00000037010	Apln	9708	2.18933	2.19812	1.67592	0.00409479	0.0744082
ENSMUSG00000034457	Eda2r	43377	-1.5958	-1.60024	1.95238	0.0041027	0.0744507
ENSMUSG00000038756	Ttll6	31666	-2.13103	-2.14565	0.925415	0.00412342	0.0747251
ENSMUSG00000001661	Hoxc6	13625	1.99198	2.0033	1.14075	0.00415685	0.0752289
ENSMUSG00000034059	Ypel4	4598	-2.29449	-2.30359	1.75171	0.00416409	0.0752579
ENSMUSG00000096965	3300005D01Rik	4585	2.03855	2.07169	-0.202832	0.00417017	0.0752659
ENSMUSG00000098158	Gm4804	123368	2.3489	2.37381	0.472149	0.00425437	0.076682
ENSMUSG00000056771	Gm10010	12828	-1.80645	-1.80978	2.6132	0.00426035	0.0766862
ENSMUSG00000035131	Brinp3	407713	-1.51253	-1.51271	6.40144	0.0043078	0.077436
ENSMUSG00000033192	Lpcat2	63941	-2.87395	-2.90745	0.545293	0.00434981	0.078086
ENSMUSG00000026736	4930426L09Rik	2419	-2.23595	-2.26896	-0.0192355	0.00448081	0.0802332
ENSMUSG00000022489	Pde1b	27019	2.13178	2.14488	1.08679	0.00448143	0.0802332
ENSMUSG00000017417	Plxdc1	63207	-2.45037	-2.4821	0.257544	0.00449276	0.0803283
ENSMUSG00000031740	Mmp2	26130	-1.54663	-1.54666	8.91783	0.00455231	0.0812843
ENSMUSG00000115050	Gm21154	26815	1.9449	1.95944	0.744589	0.00458577	0.0817725
ENSMUSG00000046387	Pcdhb17	4660	-2.2167	-2.22395	1.98988	0.00462302	0.0823268
ENSMUSG00000027890	Gstm4	4487	2.05231	2.0623	1.37462	0.00471315	0.08382
ENSMUSG00000028909	Ptpru	69832	-4.44004	-4.45011	3.75986	0.00479226	0.0851135
ENSMUSG00000038146	Notch3	46033	-2.65711	-2.66286	2.75431	0.00480582	0.085241
ENSMUSG00000036687	Tmem184a	17433	-1.5189	-1.52128	2.74505	0.00490013	0.0867986
ENSMUSG00000050150	Slc9b1	49799	2.01327	2.03131	0.548673	0.00491627	0.0869691
ENSMUSG00000064346	mt-Tw	67	-1.80379	-1.80662	2.83244	0.00493995	0.0872724
ENSMUSG00000049999	Ppp1r3d	3267	-3.12688	-3.19491	-0.104533	0.00496453	0.0875909
ENSMUSG00000032285	Dnaja4	17443	-2.14359	-2.17001	0.166402	0.0050873	0.0896385
ENSMUSG00000006651	Aplp1	10554	-3.45156	-3.52136	0.140877	0.00515003	0.0905389
ENSMUSG00000021703	Serinc5	100857	-1.72235	-1.72346	4.0819	0.00515196	0.0905389
ENSMUSG00000097028	Ptgs2os	25091	1.67913	1.6926	0.561261	0.00533221	0.0935835
ENSMUSG00000032911	Cspg4	34838	1.86486	1.865	7.20204	0.00541477	0.0949077
ENSMUSG00000047910	Pcdhb16	5225	-1.86409	-1.86703	2.85535	0.00545891	0.095556
ENSMUSG00000036181	H1f2	1560	-2.23449	-2.23492	6.02241	0.00557161	0.097401
ENSMUSG00000032232	Cgnl1	145094	-1.74465	-1.74483	6.71182	0.00569561	0.0994386
ENSMUSG00000074579	Lekr1	165128	-1.82053	-1.84014	0.213724	0.00587313	0.102404
ENSMUSG00000019996	Map7	133120	1.84195	1.85046	1.34292	0.00597546	0.104053
ENSMUSG00000052353	Cemip	153646	-1.62782	-1.62987	3.09876	0.00598763	0.104129
ENSMUSG00000034780	B3galt1	556819	-1.66823	-1.67197	2.28559	0.00614331	0.106697
ENSMUSG00000022708	Zbtb20	766722	-1.38307	-1.38312	7.93191	0.00615465	0.106755
ENSMUSG00000034738	Nostrin	53531	1.45068	1.45163	3.96994	0.00618343	0.107115
ENSMUSG00000036523	Greb1	130272	-3.72791	-3.73422	3.72866	0.00620103	0.107281
ENSMUSG00000038543	BC028528	8052	1.95277	1.95812	2.10414	0.00621612	0.107403
ENSMUSG00000022799	Arhgap31	114935	-1.36351	-1.36376	5.72297	0.00622576	0.10743
ENSMUSG00000039239	Tgfb2	83198	-2.20274	-2.20357	5.04208	0.00628874	0.108149
ENSMUSG00000042099	Kank3	12400	2.10648	2.12905	0.343998	0.00629528	0.108149
ENSMUSG00000086272	BC039966	2911	1.58556	1.59028	1.88119	0.00629863	0.108149
ENSMUSG00000004473	Clec11a	4216	-2.92534	-2.96472	0.394096	0.00629979	0.108149
ENSMUSG00000086233	Gm11816	4686	2.5659	2.61996	-0.329317	0.00634119	0.10872
ENSMUSG00000035109	Shc4	96702	1.65545	1.66091	1.75642	0.00638814	0.109385
ENSMUSG00000070348	Ccnd1	9995	1.5603	1.56034	8.4659	0.00640502	0.109503
ENSMUSG00000026094	Stk17b	29719	-1.44832	-1.44856	5.93645	0.00641147	0.109503
ENSMUSG00000028583	Pdpn	32134	-3.79541	-3.81312	2.28366	0.00646174	0.110221
ENSMUSG00000086454	Platr14	12282	1.62866	1.62938	4.57589	0.00648204	0.110263
ENSMUSG00000049699	Ucn2	1155	2.87053	2.94497	-0.419789	0.00648795	0.110263
ENSMUSG00000029287	Tgfbr3	183060	-1.66861	-1.66901	5.47246	0.00648899	0.110263
ENSMUSG00000022257	Laptm4b	46275	-1.57507	-1.57522	6.81376	0.00651196	0.110513
ENSMUSG00000001604	Tcea3	27170	-2.65195	-2.69756	-0.0551163	0.0065367	0.110792
ENSMUSG00000037206	Islr	48039	-2.06933	-2.07115	3.76797	0.00656215	0.111083
ENSMUSG00000026463	Atp2b4	101585	-1.54123	-1.54289	3.26778	0.00661935	0.111909
ENSMUSG00000026380	Tfcp2l1	57224	2.8256	2.87049	0.179704	0.00667154	0.112649
ENSMUSG00000095872	Gm15128	67466	-2.03987	-2.09103	-0.715244	0.00670579	0.113084
ENSMUSG00000032643	Fhl3	7911	1.34109	1.34138	5.52254	0.0067385	0.113492
ENSMUSG00000050439	Enthd1	112917	2.87125	2.94579	-0.404486	0.00676081	0.113725
ENSMUSG00000022419	Deptor	146955	-1.45207	-1.45233	5.80864	0.00677753	0.113862
ENSMUSG00000073650	Catip	7214	2.24645	2.30525	-0.671197	0.00683421	0.11467
ENSMUSG00000030708	Dnajb13	13245	2.04784	2.08401	-0.298458	0.00693415	0.116201
ENSMUSG00000029380	Cxcl1	1875	-3.32614	-3.32877	4.56323	0.00696833	0.116628
ENSMUSG00000024421	Lama3	249195	1.80756	1.81487	1.51362	0.0070914	0.118539
ENSMUSG00000083282	Ctsf	5789	-1.62114	-1.62343	2.92886	0.00711564	0.118796
ENSMUSG00000044786	Zfp36	3470	-2.47879	-2.48668	2.14277	0.0072446	0.120798
ENSMUSG00000033149	Phldb2	207356	-1.40483	-1.40488	8.34625	0.00731436	0.121809
ENSMUSG00000021221	Dpf3	273972	-2.70944	-2.73386	0.820257	0.00744342	0.123804
ENSMUSG00000046623	Gjb4	2996	1.87117	1.8925	0.174779	0.00760557	0.126343
ENSMUSG00000078956	Gm14221	88657	2.93718	2.98261	0.234808	0.00762767	0.126553
ENSMUSG00000107251	Gm43102	2324	3.01204	3.08763	-0.318887	0.00767517	0.127109
ENSMUSG00000032344	Cgas	12712	-2.09586	-2.14193	-0.561666	0.00768021	0.127109
ENSMUSG00000022838	Eaf2	82120	1.59002	1.59657	1.42667	0.00769689	0.127227
ENSMUSG00000022548	Apod	18617	-10.2978	-1.44269e+08	2.48412	0.0077226	0.127495
ENSMUSG00000097601	Gm26660	63737	-1.47409	-1.47765	2.11646	0.00775982	0.127951
ENSMUSG00000058420	Syt17	67506	1.99932	2.00304	2.66805	0.00786796	0.129574
ENSMUSG00000049775	Tmsb4x	2223	1.30369	1.30372	8.78134	0.00793417	0.130503
ENSMUSG00000005148	Klf5	16346	1.69361	1.69472	4.0501	0.00801669	0.131698
ENSMUSG00000017861	Mybl2	30002	1.51457	1.51477	6.26707	0.00809829	0.132876
ENSMUSG00000082820	Gm13803	489	-1.83953	-1.87513	-0.48734	0.00824258	0.135077
ENSMUSG00000099528	2410012E07Rik	21022	1.38544	1.38698	3.20021	0.00838548	0.137251
ENSMUSG00000109111	6530437J22Rik	3875	-2.17741	-2.2374	-0.769853	0.0084254	0.137735
ENSMUSG00000059810	Rgs3	144155	-1.54782	-1.54819	5.42273	0.00864126	0.141091
ENSMUSG00000024912	Fosl1	8400	1.99518	1.99571	5.4643	0.00878475	0.143259
ENSMUSG00000064368	mt-Nd6	519	-1.37837	-1.37852	6.58876	0.00896297	0.145987
ENSMUSG00000043157	Arl11	2184	2.81937	2.83601	1.48371	0.00898778	0.146213
ENSMUSG00000025089	Gfra1	220306	-1.9882	-1.98863	5.77717	0.00900483	0.146312
ENSMUSG00000030616	Sytl2	108468	2.15513	2.18906	-0.106757	0.00912574	0.148097
ENSMUSG00000030217	Art4	9283	2.82703	2.89086	-0.281483	0.00916136	0.148494
ENSMUSG00000001333	Sync	20943	2.00177	2.02061	0.482171	0.0092005	0.148948
ENSMUSG00000054247	Gm9939	2676	2.66915	2.74203	-0.546674	0.00939354	0.151889
ENSMUSG00000024548	Setbp1	359012	-1.76279	-1.76361	4.55984	0.00946932	0.152929
ENSMUSG00000002409	Dyrk1b	7826	-1.85845	-1.86798	1.1949	0.00952291	0.153601
ENSMUSG00000074896	Ifit3	5201	-5.59507	-5.61737	3.77396	0.00953396	0.153601
ENSMUSG00000022773	Ypel1	17350	-1.75685	-1.75957	2.83508	0.00961656	0.154746
ENSMUSG00000049916	2610318N02Rik	11770	1.3808	1.38251	3.03317	0.00979356	0.157404
ENSMUSG00000106981	Gm45495	1700	-2.09168	-2.12952	-0.315772	0.00986221	0.158317
ENSMUSG00000039457	Ppl	46131	1.5882	1.58869	5.08461	0.0100052	0.16042
ENSMUSG00000024901	Peli3	13411	-1.65733	-1.66456	1.36666	0.0101045	0.161817
ENSMUSG00000025355	Mmp19	9915	-1.62788	-1.62943	3.48514	0.0102312	0.16365
ENSMUSG00000039976	Tbc1d16	85455	-1.34329	-1.34338	7.31376	0.010282	0.164266
ENSMUSG00000027333	Smox	34427	1.45355	1.45397	5.13548	0.0104244	0.166331
ENSMUSG00000020598	Nrcam	273080	2.26564	2.29341	0.261826	0.0104362	0.166331
ENSMUSG00000109857	Gm53058	19344	-2.09542	-2.12004	0.224584	0.0105409	0.167801
ENSMUSG00000024512	Dynap	4154	1.90105	1.9098	1.39175	0.0105552	0.167828
ENSMUSG00000041828	Abca8a	70345	3.11807	3.15135	0.780815	0.010593	0.168228
ENSMUSG00000050357	Carmil2	11914	1.80634	1.82731	0.130327	0.0106157	0.168389
ENSMUSG00000046191	Pcdhb20	3559	-3.1747	-3.2149	0.627741	0.0107016	0.16955
ENSMUSG00000027901	Dennd2d	20626	-1.70153	-1.70466	2.5631	0.0108296	0.171374
ENSMUSG00000064372	mt-Tp	67	-1.43962	-1.44195	2.67414	0.0108802	0.171971
ENSMUSG00000020101	Vsir	25834	-1.7948	-1.79876	2.36022	0.0109073	0.172196
ENSMUSG00000020340	Cyfip2	119010	-1.40742	-1.40891	3.26497	0.0109595	0.172816
ENSMUSG00000046179	E2f8	15168	1.70683	1.70703	6.4843	0.0109857	0.173025
ENSMUSG00000027596	a	259611	-2.71734	-2.73937	0.989143	0.011102	0.17465
ENSMUSG00000068854	H2bc21	2620	-2.09559	-2.09857	3.08995	0.0112574	0.176887
ENSMUSG00000026109	Tmeff2	286624	-1.31825	-1.31939	3.52322	0.0112852	0.177115
ENSMUSG00000097324	Carmn	15913	-3.02767	-3.05173	1.14081	0.0113307	0.17762
ENSMUSG00000027204	Fbn1	207400	-1.82045	-1.82274	3.15265	0.0113809	0.178199
ENSMUSG00000047146	Tet1	104427	-1.36062	-1.36198	3.33178	0.0114042	0.178354
ENSMUSG00000092035	Peg10	13212	-2.25137	-2.26532	1.12416	0.0114381	0.178676
ENSMUSG00000017607	Tns4	23629	-2.70429	-2.73141	0.650134	0.0115244	0.179813
ENSMUSG00000005583	Mef2c	163047	-1.77569	-1.78709	0.89691	0.0116924	0.182222
ENSMUSG00000105366	Gm43719	2199	-2.33768	-2.34328	2.47055	0.0117665	0.183162
ENSMUSG00000048644	Ctxn1	1615	-1.83707	-1.83874	3.63738	0.0118632	0.184429
ENSMUSG00000022661	Cd200	26919	-3.27843	-3.34738	0.00921644	0.0118755	0.184429
ENSMUSG00000031714	Gab1	116082	-1.34919	-1.34992	4.21207	0.0119317	0.185086
ENSMUSG00000013483	Card14	37608	2.27079	2.29693	0.302829	0.0120106	0.186094
ENSMUSG00000010461	Eya4	247823	-1.72952	-1.73769	1.27407	0.0120603	0.186648
ENSMUSG00000116305	Lncppara	53972	-1.88835	-1.89233	2.44906	0.0121135	0.187254
ENSMUSG00000094151	Gm7233	8122	1.66077	1.66883	1.20808	0.0122577	0.189265
ENSMUSG00000052769	Gm9889	1591	-2.26481	-2.28891	0.393485	0.0122741	0.189299
ENSMUSG00000031134	Rbmx	9507	1.19288	1.1931	5.72411	0.012396	0.190959
ENSMUSG00000035112	Wnk4	16843	-2.56856	-2.58472	1.26515	0.0126227	0.194226
ENSMUSG00000029314	Gpat3	53390	1.51823	1.51878	4.8623	0.0128364	0.197288
ENSMUSG00000031662	Snx20	9566	1.5135	1.51647	2.41874	0.0130399	0.199921
ENSMUSG00000115326	Gm35019	6722	-2.36825	-2.39269	0.50725	0.013052	0.199921
ENSMUSG00000002996	Hbp1	24282	-1.20909	-1.20927	6.04571	0.0130526	0.199921
ENSMUSG00000020836	Coro6	8074	-1.85501	-1.86233	1.58149	0.0131282	0.200848
ENSMUSG00000029096	Htra3	27760	-2.55464	-2.57272	1.10287	0.013194	0.201624
ENSMUSG00000006403	Adamts4	10217	-1.64714	-1.64859	3.61231	0.0132119	0.201666
ENSMUSG00000047810	Ccdc88b	13589	1.98887	2.02469	-0.329208	0.0132618	0.202197
ENSMUSG00000039963	Ccdc40	36667	-1.42314	-1.42632	2.21137	0.0132935	0.202449
ENSMUSG00000022324	Matn2	129597	-1.55127	-1.55145	6.49852	0.0133539	0.203138
ENSMUSG00000035441	Myo1d	297900	-1.46169	-1.46492	2.24266	0.013447	0.20432
ENSMUSG00000040124	Gorab	18762	-1.51812	-1.51828	6.61227	0.013568	0.205925
ENSMUSG00000073530	Pappa2	268764	2.52373	2.56693	-0.0529356	0.013745	0.208331
ENSMUSG00000074818	Pdzd7	18812	1.98862	1.9946	2.01983	0.0137577	0.208331
ENSMUSG00000025422	Agap2	17886	-1.87039	-1.87734	1.67929	0.0138719	0.209702
ENSMUSG00000024743	Syt7	64091	-1.68853	-1.70155	0.616798	0.0138824	0.209702
ENSMUSG00000063558	Aox1	76483	-1.5895	-1.5913	3.22725	0.0138953	0.209702
ENSMUSG00000087556	Gm15764	5316	-2.21294	-2.24343	0.0217758	0.013996	0.210983
ENSMUSG00000008384	Sertad1	3407	1.34815	1.34881	4.35681	0.0141082	0.212434
ENSMUSG00000110559	Gm26843	41573	-2.18791	-2.23018	-0.369553	0.0141462	0.212767
ENSMUSG00000046731	Kctd11	3146	1.26862	1.26962	3.6458	0.0142904	0.214693
ENSMUSG00000038521	C1s1	12015	-1.4631	-1.46327	6.45322	0.0144364	0.216436
ENSMUSG00000042671	Rgs8	47299	-2.0599	-2.07718	0.66404	0.0144543	0.216436
ENSMUSG00000054753	AU018091	14532	1.55772	1.56443	1.35776	0.014468	0.216436
ENSMUSG00000103144	Pcdhga1	180081	1.78981	1.80126	0.890694	0.0144712	0.216436
ENSMUSG00000006014	Prg4	16754	-3.99196	-4.01237	2.34181	0.0145296	0.217066
ENSMUSG00000026737	Pip4k2a	155872	-1.54496	-1.54529	5.61236	0.0146551	0.218696
ENSMUSG00000026923	Notch1	58761	-2.90257	-2.91824	1.64623	0.0148741	0.221717
ENSMUSG00000039384	Dusp10	62335	1.28458	1.28596	3.20369	0.0150177	0.223608
ENSMUSG00000050556	Kcnb1	94187	1.65597	1.66206	1.615	0.015038	0.223661
ENSMUSG00000078190	Dnm3os	7928	-1.88632	-1.88648	7.0198	0.0154132	0.228987
ENSMUSG00000053646	Plxnb1	24529	-2.26597	-2.28877	0.490398	0.0155866	0.231305
ENSMUSG00000034762	Glis1	200471	1.98855	2.00731	0.435387	0.0156499	0.231986
ENSMUSG00000023034	Nr4a1	20527	-1.40646	-1.40701	4.68556	0.0158866	0.235235
ENSMUSG00000007613	Tgfbr1	61710	-1.23996	-1.24004	7.19708	0.0159236	0.235521
ENSMUSG00000014776	Nol3	5800	-1.40915	-1.41231	2.20181	0.0161898	0.238933
ENSMUSG00000028780	Sema3c	155988	1.73137	1.74813	0.348713	0.0161901	0.238933
ENSMUSG00000023411	Nfatc4	10800	-1.41525	-1.41578	4.75	0.0163323	0.240559
ENSMUSG00000024975	Pdcd4	37630	-1.33802	-1.33822	6.01444	0.0163469	0.240559
ENSMUSG00000024330	Col11a2	27249	-2.63516	-2.64792	1.63959	0.0163543	0.240559
ENSMUSG00000048347	Pcdhb18	5041	-1.67257	-1.67662	2.17484	0.0164197	0.241012
ENSMUSG00000011148	Adssl1	21316	1.47389	1.47484	3.99061	0.0164211	0.241012
ENSMUSG00000022037	Clu	13065	2.26846	2.27421	2.35239	0.0164402	0.241027
ENSMUSG00000022103	Gfra2	89719	-1.46519	-1.46906	1.99171	0.016485	0.241418
ENSMUSG00000042515	Pwwp3b	28294	1.44996	1.45079	4.16278	0.0166109	0.242768
ENSMUSG00000030157	Clec2d	5920	-3.11716	-3.16503	0.357153	0.0166135	0.242768
ENSMUSG00000031342	Gpm6b	150078	-3.19182	-3.20175	2.50675	0.0166401	0.242891
ENSMUSG00000044544	4921513I03Rik	13155	1.67248	1.68698	0.471713	0.0167105	0.243653
ENSMUSG00000118671	Eppk1	31066	-1.75801	-1.76768	1.085	0.0168272	0.245086
ENSMUSG00000033016	Nfatc1	106867	1.30986	1.3102	5.26116	0.01687	0.245442
ENSMUSG00000022108	Itm2b	23064	-1.30927	-1.30935	7.36807	0.0169159	0.245842
ENSMUSG00000043460	Elfn2	51441	2.48746	2.53524	-0.225624	0.016982	0.246535
ENSMUSG00000042417	Ccno	2976	1.76675	1.78105	0.575068	0.0171349	0.248484
ENSMUSG00000017002	Slpi	35026	1.67704	1.69101	0.497652	0.0174772	0.252928
ENSMUSG00000060961	Slc4a4	353168	-1.85913	-1.86539	1.77393	0.0174792	0.252928
ENSMUSG00000033170	Card10	27905	-1.60608	-1.6098	2.22334	0.017542	0.25332
ENSMUSG00000020684	Rasl10b	11903	-2.72037	-2.7776	-0.234532	0.017557	0.25332
ENSMUSG00000047712	Ust	314070	-1.20808	-1.20873	4.16589	0.0175632	0.25332
ENSMUSG00000026043	Col3a1	38169	-2.35333	-2.35336	9.71755	0.0176468	0.254251
ENSMUSG00000042306	S100a14	1982	-2.11613	-2.1441	0.0644616	0.0179085	0.257724
ENSMUSG00000056656	Apol8	9206	-3.08318	-3.12001	0.665358	0.0179265	0.257724
ENSMUSG00000038453	Srcin1	66847	-2.31546	-2.3322	0.969993	0.0179656	0.258009
ENSMUSG00000073678	Pgap1	84691	-1.26748	-1.26798	4.64188	0.0179983	0.258201
ENSMUSG00000075020	Mir670hg	104395	-2.13072	-2.16882	-0.266676	0.018025	0.258307
ENSMUSG00000021217	Tshz3	75436	-1.59896	-1.6007	3.28887	0.0180569	0.258486
ENSMUSG00000019055	Plod1	27015	-1.17457	-1.17465	7.16904	0.018452	0.26386
ENSMUSG00000078815	Cacng6	11473	2.28446	2.31231	0.277214	0.0185336	0.264742
ENSMUSG00000086688	Gm11560	948	1.52396	1.5297	1.53587	0.0186121	0.26558
ENSMUSG00000031616	Ednra	61434	-1.4157	-1.41624	4.73501	0.0186391	0.265682
ENSMUSG00000027435	Cd93	6924	-1.79945	-1.81451	0.53742	0.0186937	0.266175
ENSMUSG00000003070	Efna2	10529	-1.40727	-1.40852	3.51609	0.0187989	0.267389
ENSMUSG00000019768	Esr1	394022	-2.11667	-2.11784	4.45395	0.0192705	0.273804
ENSMUSG00000066607	Insyn1	11178	1.90868	1.91717	1.43209	0.0193897	0.275206
ENSMUSG00000102278	Gm37145	2756	-1.39183	-1.39528	2.05531	0.0194177	0.275311
ENSMUSG00000052565	H1f3	7425	-2.48915	-2.49546	2.47392	0.019828	0.28083
ENSMUSG00000053560	Ier2	1524	-1.2722	-1.27229	7.19175	0.0199058	0.281633
ENSMUSG00000121198	NA	720	-1.57996	-1.60267	-0.214024	0.0199579	0.282072
ENSMUSG00000000266	Mid2	103117	1.30023	1.30063	5.03544	0.0199881	0.282199
ENSMUSG00000051669	AU021092	10477	-1.63826	-1.63946	3.84822	0.020734	0.2923
ENSMUSG00000109321	A330076H08Rik	52222	1.85276	1.86317	1.09845	0.0207472	0.2923
ENSMUSG00000076431	Sox4	4795	-1.62683	-1.62699	6.7553	0.0207889	0.292577
ENSMUSG00000010307	Tmem86a	4177	-2.22059	-2.221	6.07396	0.0209393	0.294385
ENSMUSG00000039621	Prex1	147491	-2.04949	-2.05131	3.7564	0.0211092	0.296462
ENSMUSG00000020376	Rnf130	100374	-2.47644	-2.53951	-0.584476	0.02118	0.297143
ENSMUSG00000056367	Actr3b	90692	-1.3202	-1.32279	2.36738	0.0215163	0.301544
ENSMUSG00000051225	Fam83a	25591	1.89715	1.91473	0.433984	0.0217237	0.304131
ENSMUSG00000005360	Slc1a3	76641	-1.73488	-1.73571	4.52179	0.0218885	0.306118
ENSMUSG00000117924	Tmem223	1480	-1.48661	-1.49414	1.10294	0.021916	0.306182
ENSMUSG00000043903	Zfp469	14031	-1.41432	-1.4144	7.61177	0.0220128	0.307213
ENSMUSG00000032135	Mcam	8259	-2.29658	-2.31403	0.864274	0.022072	0.307718
ENSMUSG00000041607	Mbp	110492	-1.67908	-1.68726	1.23312	0.0223817	0.311711
ENSMUSG00000030102	Itpr1	338014	-1.2177	-1.21791	5.80538	0.0224085	0.311758
ENSMUSG00000019966	Kitl	84787	1.6879	1.68966	3.39575	0.0225496	0.313394
ENSMUSG00000009281	Rarres2	3094	-1.98112	-1.99819	0.554367	0.0226249	0.314114
ENSMUSG00000116656	Gm49708	8048	-1.75425	-1.76758	0.657933	0.02278	0.315939
ENSMUSG00000019841	Rev3l	143094	-1.33003	-1.33019	6.39029	0.0229139	0.317466
ENSMUSG00000015468	Notch4	24236	1.6515	1.67151	0.0229141	0.0231366	0.32022
ENSMUSG00000054426	A930005H10Rik	6569	-1.54945	-1.55559	1.46159	0.023596	0.326241
ENSMUSG00000045991	Onecut2	60968	-1.42126	-1.42165	5.20012	0.0237032	0.327383
ENSMUSG00000116180	Gm49492	2563	-1.83694	-1.86012	0.0257828	0.0239213	0.330055
ENSMUSG00000017740	Slc12a5	38930	-2.16043	-2.18273	0.424817	0.0242375	0.334073
ENSMUSG00000050359	Sprr1a	1944	-4.27091	-4.28743	2.94352	0.0243136	0.334775
ENSMUSG00000035284	Vps13c	155243	-1.14461	-1.14473	6.56253	0.024601	0.338384
ENSMUSG00000086003	B230206L02Rik	22362	-1.4908	-1.50615	0.170079	0.0252707	0.347238
ENSMUSG00000109946	Brd3os	1898	1.22899	1.22967	4.1521	0.0254326	0.349103
ENSMUSG00000063193	Cd300lb	11606	-1.74424	-1.75516	0.901484	0.0256409	0.351602
ENSMUSG00000029671	Wnt16	10296	-1.50689	-1.51761	0.667862	0.025869	0.354366
ENSMUSG00000024659	Anxa1	17517	1.37503	1.37505	9.5484	0.0259705	0.355391
ENSMUSG00000021559	Dapk1	161245	-1.52316	-1.52435	3.72659	0.0260474	0.356079
ENSMUSG00000029070	Mxra8	4409	-1.38198	-1.38212	6.65361	0.0264649	0.361416
ENSMUSG00000022723	Crybg3	110205	-1.53816	-1.55143	0.41192	0.0269739	0.367992
ENSMUSG00000024769	Cdc42bpg	19197	1.6317	1.64665	0.365484	0.027025	0.368312
ENSMUSG00000071657	Bscl2	11217	-1.32712	-1.32913	2.73144	0.0273781	0.372744
ENSMUSG00000031750	Il34	64096	1.48626	1.50044	0.277598	0.0274421	0.373235
ENSMUSG00000048455	Sprr1b	1981	-1.77212	-1.78975	0.319282	0.0275267	0.374005
ENSMUSG00000069874	Irgm2	23165	-2.64416	-2.65306	2.14117	0.0277389	0.37608
ENSMUSG00000022307	Oxr1	413567	1.1473	1.14738	7.08387	0.0277558	0.37608
ENSMUSG00000049866	Arl4c	29097	1.29405	1.29428	5.79709	0.0277639	0.37608
ENSMUSG00000021365	Nedd9	177782	1.38437	1.38465	5.60053	0.0278279	0.376565
ENSMUSG00000108053	Gm43890	2799	1.56611	1.58067	0.324593	0.0278659	0.376697
ENSMUSG00000050022	Amz1	37313	1.48409	1.49505	0.618601	0.0281328	0.37992
ENSMUSG00000070047	Fat1	116811	-1.17443	-1.17457	6.35094	0.0284241	0.383467
ENSMUSG00000108158	Gm44002	594	2.41058	2.45781	-0.263809	0.0284583	0.38354
ENSMUSG00000029334	Prkg2	107579	1.28671	1.28692	5.85089	0.0285349	0.384186
ENSMUSG00000042035	Igsf3	85977	-1.5085	-1.51177	2.29494	0.0288095	0.387492
ENSMUSG00000000958	Slc7a7	48339	1.31058	1.31307	2.40874	0.0290664	0.390554
ENSMUSG00000022231	Sema5a	451532	-1.39542	-1.39565	5.94451	0.0291746	0.391614
ENSMUSG00000055148	Klf2	2624	-1.40314	-1.40468	3.21212	0.0295638	0.396439
ENSMUSG00000079057	Cyp4v3	28273	-1.24711	-1.24849	3.1703	0.0299874	0.401406
ENSMUSG00000105708	Gm36070	4336	-1.61062	-1.63505	-0.266743	0.0299943	0.401406
ENSMUSG00000033350	Chst2	7431	-2.68031	-2.722	0.0770031	0.0301529	0.403125
ENSMUSG00000007021	Syngr3	4864	-1.34083	-1.34201	3.51787	0.0302835	0.404467
ENSMUSG00000025408	Ddit3	5515	1.79886	1.79917	5.99234	0.0303331	0.404716
ENSMUSG00000062007	Hsh2d	11890	1.81222	1.83578	-0.024264	0.0303882	0.404716
ENSMUSG00000085569	Gm12602	28364	-1.33684	-1.33742	4.52723	0.0303931	0.404716
ENSMUSG00000028634	Hivep3	404262	1.28465	1.28531	4.26841	0.0305498	0.406398
ENSMUSG00000001228	Uhrf1	20166	1.32499	1.32505	7.9983	0.0308223	0.409614
ENSMUSG00000047907	Tshz2	438804	1.22586	1.22616	5.33957	0.0309707	0.411177
ENSMUSG00000087434	Rab11fip4os1	16085	1.59295	1.6249	-0.592165	0.0311152	0.412686
ENSMUSG00000026430	Rassf5	68849	1.28922	1.29016	3.77694	0.0312178	0.413636
ENSMUSG00000085586	Gm11613	16184	-2.22329	-2.2325	1.65606	0.0313178	0.41455
ENSMUSG00000053219	Raet1e	215571	-1.38521	-1.39013	1.56707	0.0314919	0.416442
ENSMUSG00000023473	Celsr3	26650	1.49467	1.51017	0.18208	0.0321592	0.424844
ENSMUSG00000078349	AW011738	7294	-1.82581	-1.83617	1.08036	0.0322429	0.42553
ENSMUSG00000028005	Gucy1b1	42684	-1.2665	-1.26762	3.47131	0.0324723	0.427721
ENSMUSG00000047428	Dlk2	5851	1.3598	1.36051	4.27332	0.032473	0.427721
ENSMUSG00000082450	Mageb7-ps	1041	1.25134	1.25294	2.94808	0.0325262	0.427908
ENSMUSG00000033498	Strc	23441	-1.39534	-1.39599	4.44359	0.0325611	0.427908
ENSMUSG00000035158	Mitf	214298	1.19016	1.19099	3.80606	0.0325833	0.427908
ENSMUSG00000054855	Rnd1	14041	1.3608	1.36123	4.9707	0.0326994	0.429011
ENSMUSG00000019866	Crybg1	198218	1.71801	1.72209	2.24658	0.0332982	0.436438
ENSMUSG00000121107	9330133O14Rik	2851	-1.53765	-1.54206	1.90574	0.0336552	0.440685
ENSMUSG00000071203	Naip5	34585	-1.55969	-1.57691	0.112703	0.0339002	0.443459
ENSMUSG00000056313	Tcim	1805	2.15952	2.16782	1.71191	0.0344835	0.450647
ENSMUSG00000055333	Fat2	85956	1.68946	1.69705	1.34686	0.0345512	0.451091
ENSMUSG00000103662	Gm34294	4263	1.49609	1.5103	0.281196	0.0348139	0.454077
ENSMUSG00000062380	Tubb3	10592	1.59449	1.59469	6.40448	0.0355588	0.46334
ENSMUSG00000089901	Gm8113	8022	1.45413	1.46753	0.313019	0.035642	0.463971
ENSMUSG00000030162	Olr1	21922	-2.58359	-2.59833	1.3681	0.0357277	0.464634
ENSMUSG00000047945	Marcksl1	2405	-1.46486	-1.46653	3.18771	0.0358753	0.4661
ENSMUSG00000078853	Igtp	8036	-2.6761	-2.68486	2.19907	0.0359401	0.466488
ENSMUSG00000030854	Ptpn5	55890	-1.56031	-1.56941	0.933786	0.0360223	0.466864
ENSMUSG00000040329	Il7	43767	1.68413	1.70237	0.173297	0.036039	0.466864
ENSMUSG00000022842	Ece2	16658	1.44938	1.4576	0.94268	0.0367988	0.476245
ENSMUSG00000002108	Nr1h3	18774	1.22796	1.22926	3.2191	0.0369262	0.477431
ENSMUSG00000120623	NA	802	-2.11456	-2.12068	2.11455	0.0381842	0.493219
ENSMUSG00000097812	Gm26812	10428	1.80807	1.83322	-0.0791495	0.0383253	0.494564
ENSMUSG00000033763	Mtss2	19925	-1.39362	-1.39374	6.86375	0.0384907	0.496218
ENSMUSG00000106674	Gm20005	7285	-1.47341	-1.47873	1.57301	0.0385976	0.497116
ENSMUSG00000040026	Saa3	3703	-1.64447	-1.64866	2.10032	0.0387079	0.498056
ENSMUSG00000078521	Aunip	12929	1.15696	1.15726	5.20843	0.0394453	0.507057
ENSMUSG00000004558	Ndrg2	8888	-1.20538	-1.20561	5.68515	0.0395483	0.507891
ENSMUSG00000028456	Unc13b	205919	-1.83543	-1.85126	0.509907	0.0397269	0.509695
ENSMUSG00000121092	NA	534	1.52688	1.54019	0.415289	0.04046	0.518602
ENSMUSG00000116864	Gm3320	1031	1.48971	1.50144	0.52246	0.040608	0.520001
ENSMUSG00000038175	Mylip	22281	-1.30861	-1.30946	3.9354	0.0406536	0.520086
ENSMUSG00000045092	S1pr1	4640	-1.58292	-1.58345	4.97501	0.0407937	0.521379
ENSMUSG00000107879	9330102E08Rik	14100	-1.34834	-1.34921	3.93676	0.0409521	0.522903
ENSMUSG00000047547	Cltb	18944	1.2001	1.20034	5.62944	0.0411075	0.524386
ENSMUSG00000053552	Ebf4	75313	-1.45062	-1.45295	2.68824	0.0412073	0.524558
ENSMUSG00000057606	Colq	68262	-1.29297	-1.29768	1.50227	0.0412087	0.524558
ENSMUSG00000041757	Plekha6	139226	-1.51127	-1.51155	5.80405	0.0412388	0.524558
ENSMUSG00000032366	Tpm1	26817	1.31559	1.3156	9.78818	0.0413358	0.525291
ENSMUSG00000037621	Atoh8	29401	2.36137	2.36791	2.26938	0.0414315	0.525542
ENSMUSG00000016262	Sertad4	11269	1.20027	1.20066	4.89706	0.0414343	0.525542
ENSMUSG00000121016	NA	11026	1.33692	1.34297	1.21388	0.0415869	0.526977
ENSMUSG00000029843	Slc13a4	40175	-1.56203	-1.56388	3.15643	0.0416386	0.527133
ENSMUSG00000100009	Gm7967	17868	-1.4366	-1.44003	2.13681	0.0421941	0.533416
ENSMUSG00000018102	H2bc4	8710	-1.60862	-1.60965	4.05738	0.0422148	0.533416
ENSMUSG00000034083	Ccdc174	21791	1.14055	1.14083	5.28015	0.0424625	0.536039
ENSMUSG00000001506	Col1a1	16819	-1.36056	-1.36059	8.81529	0.0426517	0.537919
ENSMUSG00000052512	Nav2	701375	1.44199	1.44277	4.24584	0.0431224	0.543343
ENSMUSG00000038393	Txnip	3927	-1.66173	-1.66175	9.73231	0.0433565	0.545777
ENSMUSG00000052920	Prkg1	1200545	-1.32648	-1.327	4.68512	0.0436006	0.548333
ENSMUSG00000022346	Myc	4984	1.7752	1.77594	4.7353	0.0440081	0.552937
ENSMUSG00000026489	Coq8a	34365	-1.43429	-1.43595	3.15929	0.0442213	0.555016
ENSMUSG00000027224	Duoxa1	11540	1.69882	1.72924	-0.405728	0.0442567	0.555016
ENSMUSG00000037960	Card19	13088	1.125	1.12535	4.96352	0.0444225	0.556573
ENSMUSG00000033863	Klf9	26909	-1.15338	-1.15345	7.19953	0.0445676	0.557868
ENSMUSG00000021913	Ogdhl	26133	-1.18471	-1.18482	6.61226	0.0452126	0.565411
ENSMUSG00000074480	Mex3a	9002	-1.37836	-1.37872	5.26908	0.0454	0.567224
ENSMUSG00000032548	Slco2a1	107291	1.40775	1.40792	6.32851	0.0455764	0.568895
ENSMUSG00000017466	Timp2	54672	-1.15192	-1.15194	9.38532	0.0456505	0.569289
ENSMUSG00000054474	Thnsl2	16274	1.84343	1.86865	-0.0776106	0.0457783	0.57035
ENSMUSG00000100215	Gm8292	396	-1.64975	-1.65452	1.92701	0.0461513	0.574379
ENSMUSG00000109394	A230057D06Rik	224172	1.42196	1.42467	2.44218	0.0461877	0.574379
ENSMUSG00000109455	Gm44710	13535	1.46126	1.47426	0.363808	0.0463619	0.575592
ENSMUSG00000052957	Gas1	2961	-1.47856	-1.47871	6.64851	0.0463715	0.575592
ENSMUSG00000097000	Gm17435	12598	-1.28567	-1.28866	2.11249	0.046596	0.577842
ENSMUSG00000079484	Phyhd1	15947	-1.47317	-1.48153	0.957577	0.0466824	0.578377
ENSMUSG00000086108	Gm5602	5046	1.63774	1.66755	-0.447459	0.0471143	0.583186
ENSMUSG00000044921	Rassf9	37515	1.95654	1.98906	-0.261572	0.0475358	0.587859
ENSMUSG00000021892	Sh3bp5	76199	-1.38675	-1.38774	3.81096	0.0479444	0.592364
ENSMUSG00000071073	Lrrc73	3785	1.21169	1.21322	2.9659	0.0480394	0.592989
ENSMUSG00000025747	Tyms	15416	1.17685	1.17704	5.89367	0.0481475	0.593775
ENSMUSG00000089812	Gm15867	2029	1.36411	1.37493	0.49818	0.0481928	0.593785
ENSMUSG00000026525	Opn3	30356	1.45932	1.46752	0.977305	0.0486042	0.597944
ENSMUSG00000022805	Cfap91	44390	1.45739	1.46036	2.3712	0.0486199	0.597944
ENSMUSG00000032387	Rbpms2	30881	1.39387	1.40088	1.08469	0.0490408	0.602066
ENSMUSG00000090386	Mir99ahg	537132	-1.40993	-1.41105	3.66984	0.0490452	0.602066
ENSMUSG00000074793	Hspa12b	19042	1.2634	1.26378	5.00967	0.0493649	0.605434
ENSMUSG00000046546	Fam43a	3075	-1.16495	-1.16581	3.70189	0.0497751	0.609905
ENSMUSG00000022265	Ank	128233	-1.12289	-1.12308	5.75474	0.0499731	0.611236
ENSMUSG00000086610	Gm15408	6520	-1.66196	-1.67897	0.272224	0.0499752	0.611236
ENSMUSG00000031827	Cotl1	31323	-2.41304	-2.44708	0.0771882	0.0506189	0.618541
ENSMUSG00000117251	Gm49891	44075	-1.65111	-1.67589	-0.224117	0.0507495	0.619571
ENSMUSG00000022537	Tmem44	38988	-1.61335	-1.6159	2.76661	0.050902	0.620865
ENSMUSG00000035692	Isg15	1342	-3.2535	-3.25811	3.68678	0.051548	0.628171
ENSMUSG00000028268	Gbp3	13184	-3.75417	-3.77539	2.02084	0.0517329	0.629849
ENSMUSG00000046761	Fam83h	13244	1.47118	1.49712	-0.474454	0.0519739	0.632207
ENSMUSG00000032014	Oaf	18677	1.15982	1.15994	6.51673	0.0525729	0.638451
ENSMUSG00000027832	Ptx3	5896	1.61997	1.62017	6.4798	0.0525828	0.638451
ENSMUSG00000096171	Gm8055	1008	1.61631	1.63862	-0.116708	0.0526569	0.638469
ENSMUSG00000041797	Abca9	67448	1.25241	1.25604	1.80726	0.0526799	0.638469
ENSMUSG00000040747	Cd53	30229	-1.76606	-1.77626	1.03454	0.0527412	0.638632
ENSMUSG00000057346	Apol9a	7347	-2.43417	-2.45134	1.03541	0.0529276	0.640309
ENSMUSG00000029381	Shroom3	281884	1.27586	1.27759	2.87111	0.0531909	0.642875
ENSMUSG00000026840	Lamc3	59249	1.65216	1.68479	-0.538663	0.053236	0.642875
ENSMUSG00000057457	Phex	253238	1.59537	1.61068	0.304717	0.0537223	0.648162
ENSMUSG00000055172	C1ra	11039	-1.24973	-1.2501	5.057	0.0537977	0.648485
ENSMUSG00000024013	Fgd2	18748	-2.05437	-2.07749	0.244628	0.0542526	0.652287
ENSMUSG00000024049	Myom1	124224	1.34704	1.34954	2.46201	0.0542586	0.652287
ENSMUSG00000070327	Rnf213	94319	-1.33939	-1.33942	9.02231	0.0542596	0.652287
ENSMUSG00000018983	E2f2	23664	1.33739	1.33781	4.99355	0.0543368	0.652628
ENSMUSG00000046561	Arsj	76692	1.39279	1.39583	2.22644	0.0547719	0.657263
ENSMUSG00000041120	Nbl1	10710	-2.23093	-2.25785	0.204232	0.0550199	0.659646
ENSMUSG00000042797	Aqp11	14284	-1.29911	-1.30637	0.921065	0.055389	0.663476
ENSMUSG00000034792	Gna15	21920	1.45753	1.46382	1.30493	0.0554659	0.663801
ENSMUSG00000074071	Fam169b	89254	-1.41668	-1.43942	-0.399153	0.0555523	0.66424
ENSMUSG00000044330	Gm9790	288	1.47303	1.49554	-0.296566	0.0557598	0.666126
ENSMUSG00000061393	Acvr2b	32878	-1.26219	-1.2645	2.45388	0.0558119	0.666152
ENSMUSG00000090698	Apold1	5119	1.25866	1.26083	2.52281	0.0560645	0.66857
ENSMUSG00000111942	Gm5182	6092	-1.9514	-1.9545	2.89408	0.0561371	0.668838
ENSMUSG00000021453	Gadd45g	1791	-1.34453	-1.34462	7.09935	0.0562041	0.669039
ENSMUSG00000028843	Sh3bgrl3	1384	1.2081	1.20824	6.33895	0.0562546	0.669044
ENSMUSG00000110246	C130073E24Rik	173707	-1.54516	-1.54617	4.01903	0.0563597	0.669698
ENSMUSG00000117406	Ntn3	5684	1.39964	1.40466	1.54484	0.0566529	0.672583
ENSMUSG00000117123	Gm49890	28667	-1.18269	-1.18296	5.40166	0.0567551	0.673166
ENSMUSG00000078869	Gm14409	2383	1.24004	1.24352	1.85493	0.0568028	0.673166
ENSMUSG00000038600	Atp6v0a4	76104	2.04128	2.06464	0.251055	0.056948	0.674288
ENSMUSG00000120210	NA	2303	-1.33724	-1.34864	0.384862	0.0570702	0.675136
ENSMUSG00000118106	Gm54639	2276	1.39684	1.40446	0.969911	0.0571532	0.675521
ENSMUSG00000054203	Ifi205	19813	-1.47812	-1.47874	4.60782	0.0578386	0.683017
ENSMUSG00000020638	Cmpk2	10634	-2.32509	-2.33115	2.34653	0.0585239	0.690499
ENSMUSG00000052760	A630001G21Rik	61561	1.26267	1.2645	2.77679	0.058967	0.695113
ENSMUSG00000023905	Tnfrsf12a	2024	1.55714	1.55732	6.51232	0.0594986	0.700762
ENSMUSG00000003341	Atp8b3	19541	1.2452	1.24951	1.56628	0.0597166	0.702391
ENSMUSG00000030431	Tmem238	5100	1.2813	1.28387	2.33405	0.0597422	0.702391
ENSMUSG00000067219	Nipal1	23284	1.59875	1.60193	2.45424	0.0599444	0.704149
ENSMUSG00000028476	Reck	69277	-1.32182	-1.32326	3.20975	0.0602727	0.707383
ENSMUSG00000027276	Jag1	35189	-1.37058	-1.37111	4.68485	0.0605572	0.709578
ENSMUSG00000071324	Armc2	103453	1.32303	1.32815	1.43838	0.0605659	0.709578
ENSMUSG00000020695	Mrc2	58497	-1.16073	-1.16076	8.64985	0.0608637	0.711178
ENSMUSG00000029163	Emilin1	7876	-1.27404	-1.27413	7.16507	0.0608904	0.711178
ENSMUSG00000024043	Arhgap28	161408	-1.35888	-1.35988	3.77858	0.0608912	0.711178
ENSMUSG00000045813	Gm9801	114974	1.28982	1.29488	1.40002	0.0609155	0.711178
ENSMUSG00000060284	Sp7	10577	1.28616	1.28889	2.24114	0.0613777	0.715948
ENSMUSG00000097934	6720483E21Rik	1824	1.38291	1.4046	-0.361343	0.061527	0.717063
ENSMUSG00000037991	Rmi2	57908	1.33871	1.34117	2.4686	0.0620026	0.721488
ENSMUSG00000026875	Traf1	20023	1.25366	1.25487	3.35745	0.0620147	0.721488
ENSMUSG00000028931	Kcnab2	87169	1.13127	1.13141	6.28312	0.0622697	0.723824
ENSMUSG00000024664	Fads3	18542	1.3069	1.30699	7.19969	0.0625374	0.726304
ENSMUSG00000038775	Vill	18748	1.26126	1.26175	4.64155	0.062596	0.726353
ENSMUSG00000025347	Mettl7b	2715	1.95757	1.97053	0.939571	0.0632693	0.733529
ENSMUSG00000100706	Gm19744	27062	-1.54946	-1.56517	0.207524	0.0634114	0.734099
ENSMUSG00000063594	Gng8	3651	-1.30209	-1.3092	0.945869	0.0634284	0.734099
ENSMUSG00000086328	2700033N17Rik	1257	-1.45037	-1.46127	0.562129	0.0639165	0.739108
ENSMUSG00000028364	Tnc	87231	-2.25343	-2.26354	1.56385	0.0641694	0.74139
ENSMUSG00000085039	Gm15927	12774	-1.4197	-1.4398	-0.257641	0.0643789	0.743168
ENSMUSG00000102543	Pcdhgc5	22361	-1.51462	-1.52887	0.29703	0.0645995	0.74507
ENSMUSG00000041696	Rasl12	16348	-1.59985	-1.61515	0.336906	0.0647611	0.745701
ENSMUSG00000097885	5031434O11Rik	7083	-1.58331	-1.59159	1.12155	0.0647659	0.745701
ENSMUSG00000053101	Gpr141	74576	2.00485	2.00995	2.27408	0.065603	0.754341
ENSMUSG00000031883	Car7	15655	1.38111	1.39416	0.278727	0.0656292	0.754341
ENSMUSG00000058385	H2bc8	618	-1.9555	-1.97005	0.758985	0.06577	0.755309
ENSMUSG00000017830	Dhx58	9388	-2.183	-2.19281	1.52037	0.0659138	0.75631
ENSMUSG00000097649	Gm10561	9374	1.27287	1.2778	1.41399	0.0659891	0.756524
ENSMUSG00000028464	Tpm2	9055	1.38252	1.38611	1.992	0.0664746	0.761437
ENSMUSG00000039542	Ncam1	296790	1.31559	1.31614	4.56809	0.0665844	0.761634
ENSMUSG00000023992	Trem2	7747	-1.31544	-1.32761	0.268827	0.0666059	0.761634
ENSMUSG00000028864	Hgf	66658	-1.63838	-1.64226	2.2172	0.0674349	0.770145
ENSMUSG00000106943	Dancr	2373	-1.33842	-1.33964	3.46102	0.0674655	0.770145
ENSMUSG00000044041	Krt13	4240	-2.01887	-2.02135	3.27083	0.0682191	0.778083
ENSMUSG00000015354	Pcolce2	60496	1.2132	1.21368	4.63088	0.0685499	0.781188
ENSMUSG00000027955	Gask1b	61748	-1.22804	-1.22901	3.63763	0.0687173	0.782428
ENSMUSG00000029098	Acox3	32313	-1.37935	-1.37977	5.03219	0.0690916	0.785808
ENSMUSG00000034422	Parp14	38671	-1.37004	-1.37099	3.85214	0.0691318	0.785808
ENSMUSG00000039853	Trim14	42361	-1.37993	-1.38961	0.648791	0.0694607	0.788875
ENSMUSG00000037646	Vps13b	560070	-1.09127	-1.09137	6.68185	0.0698692	0.79284
ENSMUSG00000112790	Gm33378	2758	-1.61909	-1.63393	0.351323	0.0700666	0.794405
ENSMUSG00000041935	Rimoc1	13710	-1.13258	-1.13274	6.10466	0.0703394	0.796822
ENSMUSG00000073889	Il11ra1	69486	-1.28662	-1.28691	5.44339	0.0704921	0.797875
ENSMUSG00000027323	Rad51	34653	1.18269	1.1828	6.74771	0.0708687	0.801458
ENSMUSG00000078485	Plekhn1	8262	1.29176	1.29261	3.90781	0.0710011	0.802276
ENSMUSG00000029095	Ablim2	127094	-1.39441	-1.39827	1.89814	0.071328	0.805289
ENSMUSG00000017418	Arl5b	33062	-1.08989	-1.09021	5.01069	0.0717394	0.80925
ENSMUSG00000037999	Arap2	163715	1.4312	1.4393	0.967025	0.0718453	0.80976
ENSMUSG00000021950	Anxa8	14591	2.21086	2.21505	2.77891	0.0720924	0.811676
ENSMUSG00000031574	Star	9428	-1.32141	-1.33964	-0.235758	0.0721368	0.811676
ENSMUSG00000043889	Gm8399	1117	-1.30644	-1.31529	0.665131	0.0730699	0.821483
ENSMUSG00000032715	Trib3	6611	1.48658	1.48663	8.29767	0.0732298	0.822588
ENSMUSG00000105572	Gm43300	2043	-1.50013	-1.50465	1.8294	0.0738371	0.828098
ENSMUSG00000050035	Fhl4	6209	1.33744	1.34979	0.283022	0.0738922	0.828098
ENSMUSG00000028128	F3	11512	-1.22997	-1.23039	4.83301	0.0739064	0.828098
ENSMUSG00000028125	Abca4	135681	-1.38972	-1.40445	0.112291	0.0748367	0.837819
ENSMUSG00000038037	Socs1	3297	1.22037	1.22161	3.26504	0.0749806	0.838727
ENSMUSG00000001768	Rin2	212402	-1.24558	-1.2458	5.78334	0.0755398	0.844276
ENSMUSG00000021714	Cenpk	23782	1.194	1.19452	4.47277	0.0759025	0.846729
ENSMUSG00000062470	Fbxl12os	9814	-1.39791	-1.41009	0.341629	0.0759189	0.846729
ENSMUSG00000084085	Gm16140	2056	-1.322	-1.32434	2.5155	0.0759495	0.846729
ENSMUSG00000044350	Lacc1	12705	1.11937	1.11986	4.45637	0.076193	0.848735
ENSMUSG00000023036	Pcdhgc4	26795	-1.41319	-1.436	-0.374914	0.0764968	0.851245
ENSMUSG00000028463	Car9	6764	1.3161	1.32097	1.49201	0.0765457	0.851245
ENSMUSG00000064272	Gpbar1	1075	-1.27063	-1.27107	4.8362	0.0769113	0.854598
ENSMUSG00000022637	Cblb	176824	-1.15067	-1.15098	5.16232	0.0770396	0.855312
ENSMUSG00000034799	Unc13a	47341	-1.32516	-1.34706	-0.443668	0.0777144	0.862032
ENSMUSG00000019214	Chtf18	8494	1.2055	1.2057	5.83691	0.0777739	0.862032
ENSMUSG00000015812	Gnrh1	4259	1.44569	1.47145	-0.47282	0.0782739	0.866854
ENSMUSG00000120261	NA	2049	-1.43866	-1.44648	1.03489	0.0784253	0.867812
ENSMUSG00000078716	Tmem8b	23698	-1.2576	-1.25978	2.53385	0.0785991	0.869014
ENSMUSG00000035208	Slfn8	18653	2.24742	2.25283	2.40218	0.0787039	0.86905
ENSMUSG00000010505	Myt1	64466	-1.62489	-1.63539	0.829285	0.0787325	0.86905
ENSMUSG00000075463	4930594M22Rik	24440	-1.32187	-1.34009	-0.231556	0.0788948	0.870123
ENSMUSG00000034773	Hrob	16306	1.23415	1.23457	4.82549	0.0791412	0.87212
ENSMUSG00000055435	Maf	24853	-1.42819	-1.43177	2.06483	0.0798888	0.87915
ENSMUSG00000033762	Recql4	6996	1.28633	1.2865	6.1917	0.0799107	0.87915
ENSMUSG00000085412	Halr1	12075	1.386	1.39141	1.42191	0.0800327	0.879767
ENSMUSG00000033910	Gucy1a1	53363	-1.32105	-1.33534	0.0622889	0.0804775	0.883929
ENSMUSG00000049624	Slc17a5	51554	-1.14124	-1.14192	4.0024	0.0805887	0.884422
ENSMUSG00000062825	Actg1	2853	-1.19619	-1.19621	9.01569	0.0815795	0.894497
ENSMUSG00000054999	Naaladl1	10011	1.40692	1.41561	0.816662	0.0816406	0.894497
ENSMUSG00000032020	Ubash3b	150600	1.28797	1.28875	4.03762	0.0828053	0.906514
ENSMUSG00000038086	Hspb2	1277	1.15588	1.15754	2.75975	0.0829032	0.906843
ENSMUSG00000019773	Fbxo5	6441	1.14033	1.1405	6.00388	0.083072	0.907946
ENSMUSG00000001930	Vwf	139906	-1.75604	-1.77432	0.197066	0.0833809	0.910577
ENSMUSG00000120920	NA	1266	1.21284	1.21714	1.52108	0.083872	0.915192
ENSMUSG00000036553	Sh3tc1	42808	-1.23584	-1.23779	2.64792	0.0845614	0.921961
ENSMUSG00000111722	Gm47270	6785	-1.27153	-1.28937	-0.251713	0.0854578	0.930974
ENSMUSG00000027994	Mcub	55247	1.18588	1.18614	5.48274	0.0865541	0.942148
ENSMUSG00000074577	Ripor3	30455	-1.3085	-1.31181	2.01946	0.0869956	0.945424
ENSMUSG00000121093	NA	3221	-1.13915	-1.13946	5.15272	0.0869965	0.945424
ENSMUSG00000068246	Apol9b	7344	-2.15646	-2.16982	1.0713	0.087571	0.950893
ENSMUSG00000120219	NA	2159	1.28794	1.30277	-0.0202642	0.0882523	0.957512
ENSMUSG00000090322	Gm17090	16010	-1.28274	-1.28642	1.83491	0.088366	0.957968
ENSMUSG00000025815	Dhtkd1	46678	-1.16222	-1.16332	3.36467	0.0887819	0.961696
ENSMUSG00000053907	Mat2a	6760	-1.39823	-1.39827	8.78272	0.0892153	0.964974
ENSMUSG00000112346	Gm48768	2290	1.20961	1.21405	1.46079	0.089229	0.964974
ENSMUSG00000029718	Pcolce	8682	1.12817	1.12821	8.28225	0.0893078	0.965044
ENSMUSG00000034949	Zfr2	18969	-1.3179	-1.31893	3.68472	0.0898903	0.970554
ENSMUSG00000117653	Gm50009	1312	-1.42706	-1.44617	-0.128814	0.090238	0.973521
ENSMUSG00000086541	Has2os	88456	1.35987	1.36938	0.636483	0.0906498	0.977174
ENSMUSG00000107215	Gm43197	2583	-1.94178	-1.96206	0.289582	0.0917952	0.988723
ENSMUSG00000034872	Gipc3	8002	1.25933	1.2618	2.34775	0.0920732	0.990918
ENSMUSG00000030600	Lrfn1	16263	-1.29616	-1.29755	3.22296	0.0923235	0.992812
ENSMUSG00000104043	Gm6525	1029	1.24132	1.25662	-0.0944891	0.0924324	0.993183
ENSMUSG00000039911	Spsb1	58761	1.1467	1.14775	3.40479	0.0934906	1
ENSMUSG00000025170	Rab40b	32127	-1.20192	-1.20361	2.80957	0.0935756	1
ENSMUSG00000046463	5930403N24Rik	11914	-1.61411	-1.62887	0.39887	0.093823	1
ENSMUSG00000041729	Coro2b	117553	1.09774	1.09826	4.30802	0.0941939	1
ENSMUSG00000028982	Slc25a33	30242	1.1327	1.13293	5.55327	0.0943548	1
ENSMUSG00000118330	Gm30042	2496	1.74982	1.7783	-0.276015	0.0945386	1
ENSMUSG00000063506	Arhgap22	155909	1.20193	1.20209	6.15717	0.0946245	1
ENSMUSG00000085873	Ttc39aos1	3955	1.21254	1.21884	1.00676	0.0953209	1
ENSMUSG00000016552	Foxred2	16201	-1.31659	-1.32138	1.51357	0.0953953	1
ENSMUSG00000110148	5830408C22Rik	9405	1.24106	1.24718	1.08045	0.0955155	1
ENSMUSG00000076437	Selenoh	1556	1.15139	1.15169	5.18867	0.0956897	1
ENSMUSG00000017724	Etv4	15630	1.36776	1.36814	5.18198	0.0957873	1
ENSMUSG00000035697	Arhgap45	14820	1.32044	1.32452	1.74882	0.0958438	1
ENSMUSG00000002799	Jag2	21958	-1.37215	-1.38818	-0.0248566	0.0969361	1
ENSMUSG00000051124	Gimap9	2986	1.11312	1.11395	3.69789	0.0985063	1
ENSMUSG00000020333	Acsl6	60959	-1.10723	-1.10805	3.70517	0.100326	1
ENSMUSG00000057182	Scn3a	110510	-1.30818	-1.30945	3.36897	0.100369	1
ENSMUSG00000029446	Psph	21892	1.27629	1.27644	6.42563	0.100691	1
ENSMUSG00000092713	Gm22858	76	-1.34733	-1.37288	-0.582927	0.101374	1
ENSMUSG00000005580	Adcy9	132970	-1.12323	-1.12416	3.52515	0.101726	1
ENSMUSG00000092281	Hmgb1-ps7	648	1.28646	1.29696	0.452711	0.102374	1
ENSMUSG00000017453	Pipox	13482	-1.80269	-1.81253	1.11509	0.102629	1
ENSMUSG00000025421	Hdhd2	31216	-1.14567	-1.14749	2.61988	0.102938	1
ENSMUSG00000106224	Gm43823	1847	-1.53105	-1.55341	-0.233817	0.102959	1
ENSMUSG00000022836	Mylk	257211	1.16749	1.17209	1.36506	0.103595	1
ENSMUSG00000020644	Id2	3342	1.35746	1.35937	2.85146	0.104606	1
ENSMUSG00000098259	Gm27616	63	-1.34223	-1.36773	-0.579885	0.105354	1
ENSMUSG00000048916	Gm5540	1848	-1.30717	-1.32633	-0.317236	0.105529	1
ENSMUSG00000115505	Gm9247	999	1.229	1.24342	-0.0548621	0.105871	1
ENSMUSG00000038375	Trp53inp2	8792	-1.10377	-1.10392	6.10232	0.105982	1
ENSMUSG00000030717	Nupr1	7613	1.10224	1.10239	6.14782	0.106098	1
ENSMUSG00000029223	Uchl1	11144	1.20823	1.20833	6.86615	0.106325	1
ENSMUSG00000057234	Mettl15	188452	1.14517	1.14799	2.00269	0.106543	1
ENSMUSG00000061104	Sap18b	789	1.2947	1.30171	0.990273	0.107387	1
ENSMUSG00000119996	NA	2009	-1.35626	-1.37147	0.0686631	0.107505	1
ENSMUSG00000084880	Tomm6os	3474	1.1826	1.19001	0.742592	0.107565	1
ENSMUSG00000061723	Tnnt3	17174	-1.40805	-1.42694	-0.198441	0.108113	1
ENSMUSG00000028873	Cdca8	20847	1.15965	1.15975	6.79795	0.108262	1
ENSMUSG00000025978	Rftn2	56624	1.28491	1.28703	2.61923	0.108599	1
ENSMUSG00000120277	Gm2885	29637	-1.19457	-1.20599	0.188557	0.108707	1
ENSMUSG00000000223	Drp2	52023	1.31485	1.32313	0.775459	0.10886	1
ENSMUSG00000032085	Tagln	6440	1.52885	1.54272	0.387022	0.109128	1
ENSMUSG00000024737	Slc15a3	19636	-1.34055	-1.34388	2.03937	0.109143	1
ENSMUSG00000027669	Gnb4	36254	1.11992	1.12055	4.09082	0.109312	1
ENSMUSG00000015243	Abca1	129109	-1.13222	-1.13247	5.40202	0.109648	1
ENSMUSG00000004187	Kifc2	8339	-1.25581	-1.25755	2.84489	0.110139	1
ENSMUSG00000047604	Frat2	2161	-1.25327	-1.25531	2.61768	0.110311	1
ENSMUSG00000070867	Trabd2b	208375	1.22712	1.22737	5.59324	0.111508	1
ENSMUSG00000091623	Gm17092	2486	1.19365	1.19806	1.44712	0.111784	1
ENSMUSG00000052387	Trpm3	856365	-1.2267	-1.24408	-0.294283	0.112264	1
ENSMUSG00000097754	Ptgs2os2	6043	1.20381	1.20565	2.69618	0.112438	1
ENSMUSG00000055912	Tmem150a	4316	-1.224	-1.2248	3.8972	0.112454	1
ENSMUSG00000016458	Wt1	47088	-1.88076	-1.88562	2.18539	0.112974	1
ENSMUSG00000109005	Gm45221	2272	-1.51482	-1.53105	0.148769	0.114091	1
ENSMUSG00000050107	Haspin	2810	1.09785	1.09834	4.41379	0.114249	1
ENSMUSG00000103309	BC037039	2205	-1.31285	-1.3246	0.302058	0.114324	1
ENSMUSG00000033855	Ston1	64903	-1.11324	-1.11345	5.67503	0.114397	1
ENSMUSG00000037349	Nudt22	3100	1.07658	1.07721	4.02794	0.114775	1
ENSMUSG00000110630	K230015D01Rik	1516	-1.26404	-1.28389	-0.423117	0.115518	1
ENSMUSG00000087590	Epb41l4aos	1162	-1.11262	-1.11305	4.61235	0.11659	1
ENSMUSG00000026064	Ptp4a1	9008	-1.30448	-1.32933	-0.639782	0.116659	1
ENSMUSG00000005237	Dnah2	128302	1.40215	1.41132	0.727929	0.117012	1
ENSMUSG00000010755	Cars	42861	1.08528	1.08532	8.0223	0.117433	1
ENSMUSG00000097207	6030443J06Rik	257460	-1.27074	-1.2822	0.269413	0.117476	1
ENSMUSG00000018740	Slc25a35	6235	-1.18438	-1.18863	1.50794	0.117746	1
ENSMUSG00000024924	Vldlr	37748	1.20905	1.20955	4.5361	0.118864	1
ENSMUSG00000039126	Prune2	267815	1.08703	1.08709	7.4661	0.119267	1
ENSMUSG00000116946	Gm41442	14724	1.16687	1.17071	1.59899	0.120474	1
ENSMUSG00000033256	Shf	20271	1.08708	1.08747	4.71255	0.120622	1
ENSMUSG00000034853	Acot11	60444	-1.40221	-1.40548	2.15157	0.121139	1
ENSMUSG00000020100	Slc29a3	40723	-1.09826	-1.09869	4.61743	0.12131	1
ENSMUSG00000021285	Ppp1r13b	79654	-1.14195	-1.14231	4.92917	0.121341	1
ENSMUSG00000027674	Pex5l	193840	1.12884	1.12996	3.2776	0.121579	1
ENSMUSG00000038550	Ciart	3749	1.13344	1.13449	3.38419	0.12264	1
ENSMUSG00000080058	Gm11175	919	1.27479	1.28777	0.161829	0.122692	1
ENSMUSG00000058542	Gm15590	552	-1.23667	-1.25904	-0.588068	0.122809	1
ENSMUSG00000028139	Riiad1	15359	1.17978	1.19388	-0.0753987	0.123059	1
ENSMUSG00000007050	Lsm2	4030	1.1028	1.10295	6.17545	0.123627	1
ENSMUSG00000050132	Sarm1	25425	-1.28652	-1.29045	1.75208	0.123839	1
ENSMUSG00000111052	Gm20139	64952	1.24072	1.24685	1.08852	0.124673	1
ENSMUSG00000042246	Tmc7	48896	1.14974	1.15127	2.86769	0.124724	1
ENSMUSG00000035279	Ssc5d	19042	-1.17382	-1.17517	3.09229	0.124882	1
ENSMUSG00000027508	Pag1	146201	-1.24344	-1.2472	1.7405	0.125604	1
ENSMUSG00000022742	Cpox	47345	1.17888	1.179	6.6154	0.125783	1
ENSMUSG00000096140	Ankrd66	9452	1.39219	1.40644	0.180861	0.126369	1
ENSMUSG00000118653	Gm2296	988	1.20433	1.21345	0.51052	0.127218	1
ENSMUSG00000112964	E430024I08Rik	30509	-1.17184	-1.17225	4.80518	0.127395	1
ENSMUSG00000105449	Gm43379	7726	-1.19106	-1.2001	0.498475	0.127603	1
ENSMUSG00000081382	Rpl18-ps1	525	-1.15653	-1.15959	1.91325	0.127631	1
ENSMUSG00000023015	Racgap1	31161	1.12496	1.125	8.13939	0.128258	1
ENSMUSG00000021798	Ldb3	62080	1.37769	1.39074	0.243158	0.12837	1
ENSMUSG00000032712	Resf1	26250	-1.19822	-1.1983	7.18859	0.128806	1
ENSMUSG00000001663	Gstt1	14772	-1.11213	-1.11301	3.58678	0.128899	1
ENSMUSG00000020241	Col6a2	27869	-1.18384	-1.18387	8.49911	0.129101	1
ENSMUSG00000105607	Gm43513	1076	1.26678	1.28144	-0.0345295	0.129312	1
ENSMUSG00000005611	Irag1	114196	-1.28543	-1.28967	1.6607	0.129886	1
ENSMUSG00000057706	Mex3b	4183	1.15716	1.15792	3.87341	0.129927	1
ENSMUSG00000074476	Spc24	4862	1.11024	1.11046	5.56598	0.129978	1
ENSMUSG00000102562	Gm37694	2133	-1.33634	-1.34819	0.321592	0.130155	1
ENSMUSG00000022906	Parp9	34136	-1.11618	-1.11654	4.8753	0.130617	1
ENSMUSG00000032750	Gab3	118616	1.22059	1.23223	0.224163	0.130746	1
ENSMUSG00000067629	Syngap1	31182	-1.14721	-1.14743	5.59612	0.132098	1
ENSMUSG00000005802	Slc30a4	21431	1.10742	1.10746	7.96829	0.132594	1
ENSMUSG00000039145	Camk1d	421059	-1.06966	-1.06979	6.30975	0.132767	1
ENSMUSG00000058173	Smco4	51829	1.08049	1.08124	3.76892	0.133123	1
ENSMUSG00000052584	Serp2	24076	1.16603	1.16697	3.61453	0.133816	1
ENSMUSG00000063659	Zbtb18	8414	1.16243	1.16259	6.07483	0.134905	1
ENSMUSG00000049571	Cfap46	82867	-1.17142	-1.17902	0.68643	0.136166	1
ENSMUSG00000025498	Irf7	3776	-1.73	-1.73337	2.51162	0.136782	1
ENSMUSG00000032417	Rwdd2a	2909	-1.18911	-1.19389	1.33361	0.136821	1
ENSMUSG00000031778	Cx3cl1	10419	-1.32086	-1.33306	0.284967	0.137076	1
ENSMUSG00000038332	Sesn1	98490	-1.17792	-1.17845	4.41784	0.137514	1
ENSMUSG00000058881	Zfp516	94652	-1.07678	-1.07691	6.26703	0.137906	1
ENSMUSG00000070780	Rbm47	156570	1.31153	1.313	3.16151	0.138774	1
ENSMUSG00000041598	Cdc42ep4	25032	-1.09917	-1.0993	6.25515	0.139614	1
ENSMUSG00000069475	Gm6020	66	-1.12649	-1.13474	0.513502	0.140588	1
ENSMUSG00000030493	Faap24	4685	1.10173	1.10258	3.63733	0.141005	1
ENSMUSG00000005774	Rfx5	7487	-1.10791	-1.10827	4.88848	0.141272	1
ENSMUSG00000103313	Gm38357	2464	-1.3384	-1.35421	-0.0445085	0.141313	1
ENSMUSG00000055116	Arntl	106662	1.12306	1.12332	5.3908	0.141643	1
ENSMUSG00000043969	Emx2	6986	1.30406	1.30415	7.08499	0.14194	1
ENSMUSG00000065036	Gm22362	134	-1.31936	-1.33984	-0.384124	0.142308	1
ENSMUSG00000040483	Xaf1	12105	-1.67839	-1.6848	1.5698	0.14236	1
ENSMUSG00000092341	Malat1	6988	-1.1481	-1.14812	9.75407	0.142884	1
ENSMUSG00000061482	H4c4	1138	1.22591	1.24274	-0.244452	0.143018	1
ENSMUSG00000007872	Id3	2259	1.41979	1.42054	4.25274	0.143179	1
ENSMUSG00000052248	Zeb2os	3381	-1.19468	-1.20207	0.757828	0.143187	1
ENSMUSG00000097572	Gm26797	15060	-1.29861	-1.31409	-0.078049	0.143849	1
ENSMUSG00000044258	Ctla2a	2471	-1.50619	-1.51602	0.777636	0.144047	1
ENSMUSG00000020656	Grhl1	45109	1.10812	1.10992	2.59368	0.144072	1
ENSMUSG00000042207	Kdm5b	75115	-1.07759	-1.07777	5.80348	0.144229	1
ENSMUSG00000030030	1700003E16Rik	6542	1.15108	1.15818	0.754185	0.1443	1
ENSMUSG00000096981	Gm16845	15121	-1.18687	-1.19124	1.4566	0.144358	1
ENSMUSG00000060639	H4c9	727	-1.1407	-1.14179	3.336	0.144399	1
ENSMUSG00000046879	Irgm1	9716	-1.23652	-1.23733	3.90035	0.144472	1
ENSMUSG00000024770	Lipn	17561	1.45672	1.47194	0.17885	0.144738	1
ENSMUSG00000036565	Ttyh3	28454	-1.11929	-1.11954	5.45048	0.144838	1
ENSMUSG00000039997	Ifi203	22266	-1.16119	-1.16132	6.44147	0.145269	1
ENSMUSG00000022012	Enox1	564998	1.1977	1.19963	2.61512	0.145554	1
ENSMUSG00000032374	Plod2	66206	-1.08978	-1.08987	6.86216	0.145588	1
ENSMUSG00000110537	Gm4316	13511	1.18371	1.18976	1.03318	0.145952	1
ENSMUSG00000055653	Gpc3	341525	-1.54603	-1.55946	0.40983	0.146309	1
ENSMUSG00000029570	Lfng	8226	1.1413	1.15333	0.0643993	0.14708	1
ENSMUSG00000074646	6430550D23Rik	34699	-1.16147	-1.16732	1.03435	0.147797	1
ENSMUSG00000044197	Gpr146	18719	-1.15269	-1.15366	3.50299	0.148113	1
ENSMUSG00000031626	Sorbs2	320119	1.10116	1.10226	3.277	0.148303	1
ENSMUSG00000054814	Usp46	69979	-1.09172	-1.09189	6.00186	0.148319	1
ENSMUSG00000090610	Gm3571	1060	1.25371	1.26504	0.291173	0.148576	1
ENSMUSG00000034040	Galnt17	436413	-1.10121	-1.10274	2.81104	0.149086	1
ENSMUSG00000031391	L1cam	42328	1.87048	1.88458	0.761112	0.149169	1
ENSMUSG00000007039	Ddah2	3061	-1.10167	-1.102	4.98347	0.149871	1
ENSMUSG00000028883	Sema3a	477153	-1.12617	-1.12624	7.22027	0.15052	1
ENSMUSG00000029009	Mthfr	20475	1.07407	1.07421	6.12215	0.150565	1
ENSMUSG00000032589	Bsn	94363	1.06082	1.06117	4.85111	0.150629	1
ENSMUSG00000099632	2900093K20Rik	602	-1.13015	-1.13919	0.416764	0.150846	1
ENSMUSG00000109783	Gm45338	39872	1.16012	1.16855	0.571657	0.150924	1
ENSMUSG00000103349	Gm36888	14837	-1.10244	-1.10607	1.59278	0.151014	1
ENSMUSG00000031785	Adgrg1	39467	-1.10279	-1.10718	1.31928	0.151018	1
ENSMUSG00000055809	Dnaaf3	9521	1.21732	1.22391	0.924702	0.151039	1
ENSMUSG00000069516	Lyz2	4991	-1.177	-1.18338	0.90006	0.151219	1
ENSMUSG00000028803	Nipal3	49619	-1.05251	-1.05296	4.44185	0.151571	1
ENSMUSG00000060621	Nkpd1	7219	1.21649	1.23244	-0.172019	0.151589	1
ENSMUSG00000097635	Gm26826	7961	1.31495	1.32816	0.158131	0.151769	1
ENSMUSG00000004018	Fancl	85742	1.09742	1.09899	2.75913	0.152452	1
ENSMUSG00000026784	Pdss1	44745	1.06996	1.07046	4.37137	0.153191	1
ENSMUSG00000101856	1700096K18Rik	1454	-1.14891	-1.16321	-0.163583	0.15361	1
ENSMUSG00000028370	Pappa	233336	-1.29317	-1.29644	2.02824	0.153705	1
ENSMUSG00000038058	Nod1	48664	-1.07638	-1.07707	3.88639	0.154247	1
ENSMUSG00000023345	Poc1a	69461	1.14615	1.14668	4.3946	0.154438	1
ENSMUSG00000034265	Zdhhc14	261255	-1.16579	-1.17227	0.912602	0.15478	1
ENSMUSG00000030584	Dpf1	14293	1.07668	1.07735	3.92953	0.155595	1
ENSMUSG00000030638	Sh3gl3	133040	-1.28965	-1.30444	0.0356715	0.156069	1
ENSMUSG00000054065	Pkp3	12293	1.12411	1.13047	0.876183	0.156507	1
ENSMUSG00000020432	Tcn2	14968	-1.06571	-1.06606	4.85454	0.156624	1
ENSMUSG00000079244	Gm5622	110164	1.09786	1.10142	1.6184	0.156727	1
ENSMUSG00000026473	Glul	9780	-1.23177	-1.23187	6.9564	0.157141	1
ENSMUSG00000045231	BC106179	4829	-1.21746	-1.22954	0.185072	0.157905	1
ENSMUSG00000028572	Hook1	58174	-1.3347	-1.3505	-0.0188899	0.158104	1
ENSMUSG00000070729	Gm12966	810	-1.12588	-1.12955	1.58908	0.158521	1
ENSMUSG00000047246	H2bc6	37455	-1.18781	-1.19716	0.431757	0.158844	1
ENSMUSG00000045659	Plekha7	184892	1.20295	1.20507	2.50252	0.159161	1
ENSMUSG00000121491	2700099C18Rik	25106	1.26648	1.2746	0.756509	0.159553	1
ENSMUSG00000048706	Lurap1l	44983	1.07865	1.08016	2.7764	0.160021	1
ENSMUSG00000040570	Rundc3b	132619	-1.12797	-1.13622	0.504752	0.160396	1
ENSMUSG00000037624	Kcnk2	194344	1.37975	1.38874	0.772998	0.161128	1
ENSMUSG00000103037	Pcdhgb1	161638	-1.08553	-1.08682	2.98968	0.16118	1
ENSMUSG00000100201	Gm29093	1826	-1.13136	-1.14325	0.0503217	0.161387	1
ENSMUSG00000039942	Ptger4	37527	-1.32174	-1.32532	1.93057	0.1617	1
ENSMUSG00000059195	Gm12715	1128	-1.0952	-1.09754	2.18239	0.162917	1
ENSMUSG00000106099	Gm42664	3239	-1.26189	-1.26481	2.12013	0.163074	1
ENSMUSG00000085596	Gm11476	54532	-1.15573	-1.16779	0.0657365	0.163372	1
ENSMUSG00000041688	Amot	58757	-1.0489	-1.04914	5.37834	0.16396	1
ENSMUSG00000020186	Csrp2	19834	-1.1422	-1.14235	6.14101	0.164065	1
ENSMUSG00000091898	Tnnc1	3418	1.11007	1.11483	1.25282	0.164411	1
ENSMUSG00000037795	N4bp2	66588	-1.04495	-1.0453	4.81138	0.164572	1
ENSMUSG00000103520	1110025M09Rik	855	-1.1341	-1.14712	-0.0356979	0.165186	1
ENSMUSG00000040034	Nup43	11379	1.03746	1.03764	5.76371	0.165524	1
ENSMUSG00000031789	Cngb1	67541	-1.1187	-1.12107	2.20623	0.165567	1
ENSMUSG00000085316	D330050G23Rik	14463	1.09029	1.09507	1.19691	0.165737	1
ENSMUSG00000051457	Spn	5592	-1.10505	-1.11241	0.641811	0.166452	1
ENSMUSG00000027962	Vcam1	19740	1.11368	1.12099	0.670833	0.166455	1
ENSMUSG00000032412	Atp1b3	31788	-1.08421	-1.08427	7.57309	0.16721	1
ENSMUSG00000085024	C230035I16Rik	3064	-1.13311	-1.14378	0.199298	0.167433	1
ENSMUSG00000027313	Chac1	3153	1.06725	1.06738	6.25531	0.167849	1
ENSMUSG00000034810	Scn7a	111490	1.45229	1.45548	2.22864	0.168025	1
ENSMUSG00000022676	Snai2	3534	1.08133	1.08198	3.98959	0.168785	1
ENSMUSG00000078851	H2aw	2146	-1.3714	-1.37408	2.38497	0.168821	1
ENSMUSG00000118642	AY036118	725	1.29454	1.30242	0.824737	0.169569	1
ENSMUSG00000033066	Gas7	229884	-1.13533	-1.13555	5.5926	0.169646	1
ENSMUSG00000001053	N4bp3	7780	1.05361	1.05432	3.81541	0.169694	1
ENSMUSG00000022422	Dscc1	14393	1.08797	1.08887	3.52777	0.169719	1
ENSMUSG00000048960	Prex2	310217	-1.0816	-1.08225	3.97137	0.169969	1
ENSMUSG00000032231	Anxa2	38176	1.15834	1.15835	10.267	0.170127	1
ENSMUSG00000099094	Gm19569	1509	-1.10678	-1.11806	0.0780984	0.170406	1
ENSMUSG00000036502	Tmem255a	55867	1.16595	1.17645	0.259523	0.170462	1
ENSMUSG00000025656	Arhgef9	147922	-1.1487	-1.155	0.88962	0.17047	1
ENSMUSG00000044017	Adgrd1	107850	-1.17378	-1.18275	0.496139	0.170494	1
ENSMUSG00000028773	Fabp3	6869	-1.35545	-1.35709	3.04583	0.170794	1
ENSMUSG00000028328	Tmod1	77098	-1.48168	-1.49271	0.614988	0.170919	1
ENSMUSG00000050271	Prag1	52960	-1.17534	-1.17548	6.36391	0.171415	1
ENSMUSG00000027797	Dclk1	296705	1.08558	1.08571	6.26042	0.171934	1
ENSMUSG00000108358	Gm44509	1324	-1.18791	-1.19319	1.18211	0.172353	1
ENSMUSG00000024660	Incenp	27256	1.05479	1.05483	7.84504	0.1733	1
ENSMUSG00000040749	Siah1b	5789	1.06714	1.0676	4.45496	0.173603	1
ENSMUSG00000030315	Vgll4	109367	-1.06408	-1.06451	4.55105	0.173671	1
ENSMUSG00000078952	Lncenc1	73950	-1.17452	-1.18547	0.221887	0.17405	1
ENSMUSG00000025085	Ablim1	282187	1.10633	1.10754	3.14687	0.174745	1
ENSMUSG00000056904	Gm5620	1348	1.08643	1.09054	1.39538	0.175283	1
ENSMUSG00000115099	1700087I21Rik	102961	1.10414	1.12181	-0.449762	0.175742	1
ENSMUSG00000040557	Mettl27	10270	-1.06436	-1.06505	3.87066	0.176558	1
ENSMUSG00000040274	Cdk6	189524	1.08759	1.09193	1.31959	0.177334	1
ENSMUSG00000068196	Col8a1	130480	-1.11584	-1.11592	7.15264	0.177527	1
ENSMUSG00000064373	Selenop	11962	-1.11407	-1.11473	4.01382	0.177868	1
ENSMUSG00000041329	Atp1b2	6207	1.34018	1.35169	0.368332	0.177893	1
ENSMUSG00000032265	Tent5a	6910	-1.17374	-1.18601	0.114509	0.177894	1
ENSMUSG00000021830	Txndc16	86864	-1.03317	-1.03334	5.82736	0.178345	1
ENSMUSG00000036158	Prickle1	96778	1.06256	1.06267	6.5362	0.17871	1
ENSMUSG00000108738	Gm44777	4379	1.11184	1.11478	1.88106	0.178881	1
ENSMUSG00000042286	Stab1	29629	1.348	1.35187	1.87877	0.178902	1
ENSMUSG00000028671	Gale	4452	1.058	1.05842	4.55912	0.179779	1
ENSMUSG00000057137	Tmem140	11801	-1.09869	-1.10391	1.09498	0.179974	1
ENSMUSG00000020205	Phlda1	2360	1.04073	1.04101	5.10484	0.1801	1
ENSMUSG00000073737	Gm10566	996	1.11877	1.12826	0.308995	0.180542	1
ENSMUSG00000034614	Pik3ip1	12571	-1.09924	-1.09989	4.00762	0.181114	1
ENSMUSG00000042745	Id1	1160	1.10416	1.10459	4.6484	0.182169	1
ENSMUSG00000107756	Gm44164	2561	-1.0945	-1.09735	1.91107	0.182561	1
ENSMUSG00000020865	Abcc3	49703	1.20985	1.21656	0.900079	0.182851	1
ENSMUSG00000037628	Cdkn3	11129	1.08484	1.08507	5.44675	0.18417	1
ENSMUSG00000029860	Zyx	10584	1.02565	1.02569	7.78245	0.184718	1
ENSMUSG00000021458	Aopep	361204	-1.04053	-1.04099	4.41442	0.185843	1
ENSMUSG00000023505	Cdca3	4155	1.0515	1.0516	6.71421	0.186007	1
ENSMUSG00000114053	Gm35330	185232	1.08919	1.09953	0.173667	0.18702	1
ENSMUSG00000027115	Kif18a	61010	1.04269	1.04293	5.35924	0.188041	1
ENSMUSG00000074203	G430095P16Rik	3838	-1.10945	-1.11435	1.18831	0.188056	1
ENSMUSG00000034758	Tle6	10170	-1.04788	-1.04856	3.87408	0.188407	1
ENSMUSG00000020897	Aurkb	6018	1.05541	1.05553	6.39534	0.189781	1
ENSMUSG00000051359	Ncald	426396	-1.15198	-1.15741	1.12048	0.190465	1
ENSMUSG00000097140	Gm26779	4907	-1.21323	-1.22367	0.327073	0.191057	1
ENSMUSG00000052605	Isoc2b	25300	-1.13907	-1.14608	0.722977	0.191924	1
ENSMUSG00000015652	Steap1	13010	1.14669	1.14688	5.87356	0.192325	1
ENSMUSG00000003948	Mmd	29134	-1.04641	-1.04686	4.47199	0.192331	1
ENSMUSG00000097755	2010110K18Rik	6952	1.0856	1.08904	1.66095	0.192353	1
ENSMUSG00000034936	Arl4d	2292	-1.20886	-1.21057	2.80671	0.193002	1
ENSMUSG00000106895	Gm4754	809	-1.08113	-1.08821	0.636248	0.193641	1
ENSMUSG00000040606	Kazn	375356	-1.03995	-1.04075	3.61342	0.195126	1
ENSMUSG00000113716	Gm47518	5334	1.11045	1.12124	0.120791	0.195772	1
ENSMUSG00000046718	Bst2	3202	-1.06789	-1.06809	5.69445	0.195844	1
ENSMUSG00000085767	Gm13563	7493	-1.12752	-1.12963	2.38676	0.196138	1
ENSMUSG00000027636	Sla2	14736	1.05355	1.05855	1.09119	0.196928	1
ENSMUSG00000040270	Bach2	347305	1.03595	1.03644	4.31237	0.198267	1
ENSMUSG00000082484	Gm16177	718	1.07198	1.08517	-0.140212	0.198487	1
ENSMUSG00000034883	Lrr1	10196	1.04938	1.05061	3.03464	0.198495	1
ENSMUSG00000028063	Lmna	29810	1.0469	1.04691	9.4885	0.198542	1
ENSMUSG00000053198	Prx	22827	1.03845	1.0395	3.22947	0.199268	1
ENSMUSG00000048965	Mrgpre	6138	-1.04417	-1.04614	2.36219	0.199577	1
ENSMUSG00000030032	Wdr54	7038	1.03062	1.03172	3.15998	0.200116	1
ENSMUSG00000069920	B3gnt9	2516	-1.04456	-1.04514	4.10513	0.200987	1
ENSMUSG00000041741	Pde3a	258180	-1.10421	-1.11886	-0.235198	0.202277	1
ENSMUSG00000074398	Gm15441	11047	-1.16052	-1.16877	0.55453	0.202596	1
ENSMUSG00000022884	Eif4a2	6693	-1.04251	-1.04254	8.28147	0.202984	1
ENSMUSG00000038168	P3h2	146497	-1.03526	-1.03679	2.69198	0.20313	1
ENSMUSG00000060288	Ppih	20537	1.03662	1.03691	5.08843	0.203661	1
ENSMUSG00000023336	Wfdc1	21858	-1.21791	-1.22152	1.7794	0.204481	1
ENSMUSG00000061411	Nol4l	122510	1.15822	1.1588	4.25884	0.204494	1
ENSMUSG00000039782	Cpeb2	56555	1.06776	1.07033	2.03201	0.2052	1
ENSMUSG00000021003	Galc	57166	-1.03493	-1.03558	3.91625	0.20581	1
ENSMUSG00000024118	Tedc2	5798	1.01975	1.0201	4.75691	0.205862	1
ENSMUSG00000097397	Gm16861	4585	-1.0523	-1.06415	-0.0306789	0.20612	1
ENSMUSG00000025153	Fasn	18702	-1.03273	-1.03275	8.71344	0.20641	1
ENSMUSG00000090086	AI480526	7944	-1.0507	-1.05204	2.922	0.206547	1
ENSMUSG00000031144	Syp	14786	-1.1157	-1.12852	-0.0788967	0.207731	1
ENSMUSG00000103509	Gm38372	4028	-1.0529	-1.05849	0.927661	0.208084	1
ENSMUSG00000032221	Mns1	24015	1.02223	1.02253	4.97311	0.208989	1
ENSMUSG00000045273	Cenph	16226	1.04412	1.04442	5.0338	0.209094	1
ENSMUSG00000082193	Rpl5-ps1	894	-1.15566	-1.17597	-0.508597	0.211258	1
ENSMUSG00000024833	Pola2	23661	1.03096	1.03102	7.13812	0.211416	1
ENSMUSG00000038664	Herc1	158326	-1.01836	-1.01843	7.13695	0.211766	1
ENSMUSG00000055782	Abcd2	45929	-1.03318	-1.03408	3.44496	0.212493	1
ENSMUSG00000030134	Rasgef1a	80109	-1.0538	-1.05534	2.69779	0.212561	1
ENSMUSG00000074796	Slc4a11	13407	1.03167	1.03332	2.58317	0.213036	1
ENSMUSG00000036528	Ppfibp2	153377	-1.05825	-1.06342	1.02729	0.213089	1
ENSMUSG00000036030	Prtg	110418	-1.04925	-1.04981	4.13592	0.213237	1
ENSMUSG00000046733	Gprc5a	19059	1.1302	1.13053	5.01709	0.213495	1
ENSMUSG00000121084	NA	1621	-1.03067	-1.03351	1.82145	0.213967	1
ENSMUSG00000024500	Ppp2r2b	445696	1.02143	1.02182	4.61532	0.214694	1
ENSMUSG00000061728	Btnl7-ps	14775	-1.04315	-1.05722	-0.275907	0.214976	1
ENSMUSG00000033306	Lpp	599072	-1.0218	-1.02188	6.87029	0.215052	1
ENSMUSG00000065431	Mir186	71	-1.26644	-1.2878	-0.462516	0.215343	1
ENSMUSG00000063415	Cyp26b1	22495	1.10703	1.12272	-0.321575	0.215604	1
ENSMUSG00000021238	Aldh6a1	20288	-1.02654	-1.02698	4.44964	0.215882	1
ENSMUSG00000020653	Klf11	11516	-1.03593	-1.03641	4.3434	0.216616	1
ENSMUSG00000053965	Pde5a	130428	-1.05571	-1.05791	2.19915	0.217516	1
ENSMUSG00000044056	Efcab9	9331	-1.10787	-1.12015	0.0276529	0.218036	1
ENSMUSG00000097882	0610038B21Rik	6843	-1.03106	-1.0344	1.6009	0.218654	1
ENSMUSG00000102824	Pdcd5-ps	381	1.03222	1.03625	1.34482	0.218861	1
ENSMUSG00000029816	Gpnmb	34384	-1.09014	-1.09015	9.28055	0.219536	1
ENSMUSG00000102602	A930004J17Rik	4610	-1.09276	-1.09381	3.31877	0.220261	1
ENSMUSG00000037313	Tacc3	20868	1.02557	1.02573	5.93883	0.220879	1
ENSMUSG00000008136	Fhl2	73911	-1.04347	-1.04395	4.36121	0.221776	1
ENSMUSG00000035936	Aldh5a1	30083	1.01412	1.01443	4.90922	0.222094	1
ENSMUSG00000037709	Fam13a	92460	1.05202	1.05394	2.3876	0.222587	1
ENSMUSG00000086938	4930481A15Rik	16108	-1.02656	-1.04126	-0.332669	0.222948	1
ENSMUSG00000038650	Rnh1	12532	1.01858	1.01865	7.12979	0.224338	1
ENSMUSG00000112847	Gm47573	2538	-1.19898	-1.2119	0.0426622	0.225121	1
ENSMUSG00000028226	Mmp16	266253	-1.01985	-1.0201	5.26615	0.225217	1
ENSMUSG00000038917	3930402G23Rik	4270	1.19951	1.21614	-0.235705	0.225859	1
ENSMUSG00000034563	Ccpg1	30912	-1.02722	-1.03005	1.82269	0.226119	1
ENSMUSG00000027583	Zbtb46	71665	-1.01423	-1.01534	3.12891	0.226604	1
ENSMUSG00000052837	Junb	4235	-1.02919	-1.02933	6.09147	0.226608	1
ENSMUSG00000109006	B230209E15Rik	85457	1.07271	1.07606	1.65331	0.226726	1
ENSMUSG00000082491	Gm5909	1281	1.021	1.03385	-0.168359	0.227961	1
ENSMUSG00000027833	Shox2	10045	-1.01226	-1.01263	4.68759	0.228516	1
ENSMUSG00000020911	Krt19	7856	-1.01866	-1.02058	2.36035	0.228954	1
ENSMUSG00000070331	Qrich2	24917	1.14288	1.15736	-0.167314	0.228967	1
ENSMUSG00000014361	Mertk	103939	-1.03277	-1.03396	3.05354	0.229386	1
ENSMUSG00000021592	Arsk	38239	-1.01349	-1.01399	4.23499	0.230313	1
ENSMUSG00000030825	Hsd17b14	12860	-1.05606	-1.06591	0.237979	0.230853	1
ENSMUSG00000104184	Gm37818	3169	-1.27381	-1.28674	0.144628	0.23171	1
ENSMUSG00000120300	NA	895	-1.02718	-1.03354	0.73963	0.231733	1
ENSMUSG00000020798	Spns3	55588	-1.05049	-1.05597	0.951817	0.231735	1
ENSMUSG00000082465	Rps6-ps3	750	-1.02069	-1.02914	0.351288	0.23188	1
ENSMUSG00000032050	Rdx	53291	-1.02747	-1.02749	8.83708	0.232078	1
ENSMUSG00000112150	9530018F02Rik	2599	1.04149	1.05396	-0.100573	0.232497	1
ENSMUSG00000031639	Tlr3	15416	-1.01007	-1.01087	3.56363	0.233163	1
ENSMUSG00000078905	Gm14393	6233	-1.01608	-1.03242	-0.464048	0.234116	1
ENSMUSG00000114515	Aldoa	8319	1.03603	1.04155	0.932514	0.234487	1
ENSMUSG00000004661	Arid3b	46441	-1.01871	-1.02491	0.742791	0.234512	1
ENSMUSG00000055963	Triqk	76716	-1.00871	-1.00956	3.49655	0.235004	1
ENSMUSG00000045790	Ccdc149	96871	1.02216	1.02358	2.77009	0.235225	1
ENSMUSG00000003316	Glg1	104796	-1.0053	-1.00533	7.97403	0.235776	1
ENSMUSG00000067608	Pcna-ps2	781	1.01166	1.01487	1.63181	0.236211	1
ENSMUSG00000082978	Rpsa-ps11	889	-1.01212	-1.01903	0.580942	0.236926	1
ENSMUSG00000109604	Gm45346	5684	1.00995	1.02665	-0.494381	0.237655	1
ENSMUSG00000087203	Gm13986	253915	-1.24158	-1.25832	-0.203821	0.237889	1
ENSMUSG00000083902	Tent2-ps1	1402	1.00895	1.02564	-0.494279	0.239007	1
ENSMUSG00000053049	Gm15413	10117	1.01463	1.02686	-0.114444	0.239035	1
ENSMUSG00000021203	Otub2	17669	1.00797	1.00838	4.537	0.239831	1
ENSMUSG00000010067	Rassf1	10713	1.00711	1.00738	5.08677	0.240161	1
ENSMUSG00000103174	Gm37168	26588	1.00822	1.02301	-0.359672	0.24049	1
ENSMUSG00000058046	4933430I17Rik	22625	1.00545	1.01284	0.495235	0.240773	1
ENSMUSG00000025574	Tk1	10567	1.00929	1.00935	7.28257	0.241322	1
ENSMUSG00000103292	Gm35048	2802	-1.02723	-1.03261	0.922047	0.24173	1
ENSMUSG00000084797	Gm14321	5103	-1.02157	-1.02912	0.49529	0.241745	1
ENSMUSG00000080115	Eef1akmt3	10510	-1.02347	-1.03085	0.525565	0.24194	1
ENSMUSG00000025324	Atp10a	173255	1.00452	1.00528	3.64892	0.242176	1
ENSMUSG00000040560	Wdr7	281092	-1.00565	-1.00591	5.18557	0.242242	1
ENSMUSG00000073274	Gm14636	22891	1.02399	1.02761	1.49583	0.242698	1
ENSMUSG00000043333	Rhbdl2	42031	1.0048	1.00592	3.09009	0.242846	1
ENSMUSG00000020647	Ncoa1	229821	-1.00437	-1.00515	3.59107	0.242985	1
ENSMUSG00000034612	Chst11	210403	-1.01085	-1.01095	6.6363	0.244557	1
ENSMUSG00000044551	9930012K11Rik	5098	1.00467	1.00582	3.04995	0.244755	1
ENSMUSG00000075590	Nrbp2	6110	-1.02256	-1.02297	4.52761	0.244879	1
ENSMUSG00000074415	Mir100hg	389918	1.00573	1.00588	5.99647	0.24632	1
ENSMUSG00000029862	Clcn1	29072	1.11822	1.13119	-0.0529437	0.246938	1
ENSMUSG00000001131	Timp1	4570	1.00831	1.00842	6.3525	0.247131	1
ENSMUSG00000035198	Tubg1	6482	1.00121	1.00134	6.22397	0.247842	1
ENSMUSG00000026556	Vangl2	27485	-1.00176	-1.00251	3.65952	0.24798	1
ENSMUSG00000104686	Gm42815	1470	-1.00948	-1.02334	-0.272665	0.249184	1
ENSMUSG00000083391	Gm14148	1040	1.01505	1.0216	0.686938	0.249262	1
ENSMUSG00000041571	Selenow	5195	1.00003	1.00022	5.61099	0.249626	1
ENSMUSG00000031465	Angpt2	51300	-0.999102	-1.00143	2.04828	0.250438	1
ENSMUSG00000005968	Tuft1	46116	-1.00278	-1.0032	4.47944	0.250807	1
ENSMUSG00000110360	Gm45380	315	-1.05909	-1.0683	0.261936	0.251135	1
ENSMUSG00000023830	Igf2r	87259	-1.00064	-1.00067	8.44785	0.251207	1
ENSMUSG00000049235	Gm7324	17551	-0.996923	-1.00046	1.45623	0.251339	1
ENSMUSG00000013089	Etv5	58411	1.00341	1.00402	3.96729	0.251763	1
ENSMUSG00000006567	Atp7b	67521	-1.00731	-1.01316	0.844866	0.251912	1
ENSMUSG00000073433	Arhgdig	8604	-0.997481	-0.998808	2.83313	0.252399	1
ENSMUSG00000087408	Cers1	15818	-1.01716	-1.01982	1.8947	0.252841	1
ENSMUSG00000026104	Stat1	42426	-1.02719	-1.02793	3.71811	0.253007	1
ENSMUSG00000060377	Rpl36a-ps1	449	-1.0244	-1.03554	-0.0262942	0.25343	1
ENSMUSG00000024056	Ndc80	30758	0.997645	0.997738	6.64313	0.253535	1
ENSMUSG00000063767	S100a7a	4653	1.30354	1.31014	1.08455	0.253688	1
ENSMUSG00000040280	Ndufa4l2	2188	1.01254	1.02573	-0.250387	0.254302	1
ENSMUSG00000040387	Klhl32	238571	-1.01071	-1.02226	-0.0472522	0.254568	1
ENSMUSG00000081792	Anp32b-ps1	758	0.989455	0.997454	0.381517	0.25523	1
ENSMUSG00000066553	Gm6969	342	-0.994662	-0.996925	2.07163	0.25532	1
ENSMUSG00000104528	Gm43314	2231	1.14694	1.16011	-0.0335485	0.255527	1
ENSMUSG00000042599	Kdm7a	70167	-0.995994	-0.996429	4.41745	0.255822	1
ENSMUSG00000050100	Hmx2	9242	0.990954	0.995647	1.07956	0.256728	1
ENSMUSG00000059743	Fdps	8372	0.991966	0.994826	1.75398	0.257252	1
ENSMUSG00000030346	Rad51ap1	16538	0.995204	0.995385	5.69036	0.257351	1
ENSMUSG00000044548	Dact1	10224	1.04794	1.04896	3.27307	0.257839	1
ENSMUSG00000029759	Pon3	35435	0.995561	0.995846	5.03056	0.258067	1
ENSMUSG00000020649	Rrm2	5906	1.00466	1.00475	6.79421	0.258148	1
ENSMUSG00000071303	Rps8-ps1	624	-0.983658	-0.99724	-0.290498	0.258662	1
ENSMUSG00000040838	Gm11639	431688	-1.00131	-1.00606	1.08822	0.258974	1
ENSMUSG00000022881	Rfc4	13795	0.992995	0.99314	6.00441	0.259061	1
ENSMUSG00000035509	Fbxl21	15427	1.00549	1.00941	1.33187	0.259075	1
ENSMUSG00000090451	Gm6133	948	1.11336	1.12431	0.155628	0.259842	1
ENSMUSG00000112922	Gm47572	3361	-1.04874	-1.0525	1.47074	0.260003	1
ENSMUSG00000052117	D630039A03Rik	7815	1.09408	1.09904	1.12895	0.260482	1
ENSMUSG00000103901	Gm37499	3478	-1.0223	-1.03793	-0.372784	0.260486	1
ENSMUSG00000071552	Tigit	15280	1.13967	1.14239	2.07865	0.260497	1
ENSMUSG00000035385	Ccl2	1883	-1.08228	-1.08285	4.15718	0.260632	1
ENSMUSG00000027752	Exosc8	6716	0.99168	0.991763	6.80243	0.260769	1
ENSMUSG00000066829	Zfp810	30901	-0.988094	-0.991363	1.54787	0.262317	1
ENSMUSG00000034858	Fam214a	79585	-0.989531	-0.990261	3.67423	0.263799	1
ENSMUSG00000068220	Lgals1	3741	0.99237	0.992375	10.6476	0.263984	1
ENSMUSG00000085636	Gm11769	1780	-1.00321	-1.01558	-0.193569	0.264296	1
ENSMUSG00000036390	Gadd45a	2362	0.988825	0.988911	6.73955	0.264664	1
ENSMUSG00000064984	Snord73a	68	-0.97643	-0.989977	-0.292298	0.265013	1
ENSMUSG00000031196	F8	209901	-0.985029	-0.987632	1.86441	0.265724	1
ENSMUSG00000104195	B230377A18Rik	1364	-1.00789	-1.02328	-0.396641	0.266026	1
ENSMUSG00000059588	Calcrl	94786	-0.98602	-0.986647	3.87489	0.266462	1
ENSMUSG00000012396	Nanog	7145	-0.991666	-1.00139	0.11249	0.266984	1
ENSMUSG00000019734	Tmc4	11764	0.982184	0.984874	1.81492	0.267423	1
ENSMUSG00000021811	Dnajc9	4273	0.989907	0.990023	6.3264	0.267791	1
ENSMUSG00000042010	Acacb	104227	-0.97829	-0.985434	0.507803	0.268017	1
ENSMUSG00000098702	1500015A07Rik	9541	-0.982154	-0.984582	1.96136	0.268237	1
ENSMUSG00000040987	Mill2	25437	-0.985109	-0.988566	1.48451	0.268675	1
ENSMUSG00000028047	Thbs3	11658	-0.987171	-0.987279	6.40314	0.2691	1
ENSMUSG00000039110	Mycbpap	20396	-1.03942	-1.05124	-0.0421106	0.269218	1
ENSMUSG00000005983	1700037C18Rik	13511	0.978509	0.982952	1.12936	0.269267	1
ENSMUSG00000020883	Fbxl20	67848	-0.98391	-0.984092	5.66037	0.27042	1
ENSMUSG00000121479	NA	53317	-0.977035	-0.985004	0.362885	0.270699	1
ENSMUSG00000019970	Sgk1	117720	-1.04706	-1.04726	5.6671	0.270856	1
ENSMUSG00000040204	Pclaf	13030	0.98138	0.981443	7.18129	0.27107	1
ENSMUSG00000067724	Gbx1	24446	0.977804	0.98178	1.28277	0.271426	1
ENSMUSG00000085289	Gm15337	22388	0.990372	0.997113	0.587329	0.271614	1
ENSMUSG00000015452	Ager	3075	1.16219	1.1769	-0.159643	0.27166	1
ENSMUSG00000104420	E230020A03Rik	2386	-0.984395	-0.98894	1.09802	0.271675	1
ENSMUSG00000115009	G930009F23Rik	18910	-0.978847	-0.983955	0.922761	0.271696	1
ENSMUSG00000116657	Gm49774	10812	0.987219	0.996228	0.200268	0.272426	1
ENSMUSG00000049690	Nckap5	917180	-0.97634	-0.985366	0.197147	0.272873	1
ENSMUSG00000048921	Zfp689	7023	0.981915	0.983329	2.72568	0.272924	1
ENSMUSG00000087213	2810408I11Rik	10830	0.978943	0.980409	2.67742	0.273319	1
ENSMUSG00000042608	Stk40	37073	0.984283	0.984634	4.71164	0.273319	1
ENSMUSG00000039813	Tbc1d2	45820	-1.01137	-1.01536	1.30298	0.273616	1
ENSMUSG00000041836	Ptpre	148813	0.989385	0.989981	3.96097	0.273889	1
ENSMUSG00000023979	Guca1b	7575	-0.974593	-0.983294	0.223534	0.273897	1
ENSMUSG00000028435	Aqp3	5462	-1.00396	-1.00495	3.23935	0.27396	1
ENSMUSG00000025969	Nrp2	115411	-0.987586	-0.987732	5.98083	0.274036	1
ENSMUSG00000073002	Vamp5	11675	0.98321	0.984585	2.75833	0.274412	1
ENSMUSG00000044966	Fbxo48	3398	0.977043	0.979025	2.24118	0.275843	1
ENSMUSG00000055760	Gemin6	4057	0.983165	0.983405	5.2626	0.276045	1
ENSMUSG00000106917	Gm7832	880	1.04183	1.05889	-0.464102	0.276262	1
ENSMUSG00000027160	Ccdc34	155544	0.976546	0.976731	5.62534	0.276471	1
ENSMUSG00000027454	Gins1	25881	0.975375	0.975729	4.69066	0.27656	1
ENSMUSG00000054951	9130008F23Rik	5078	0.975686	0.97744	2.41685	0.277407	1
ENSMUSG00000081631	Gm12005	379	-0.969088	-0.979454	0.00977898	0.277653	1
ENSMUSG00000033594	Spata2l	6433	-0.972157	-0.974536	1.98646	0.277859	1
ENSMUSG00000031202	Rab39b	6186	0.976826	0.977034	5.45569	0.278779	1
ENSMUSG00000002147	Stat6	17972	0.960625	0.974979	-0.380993	0.279077	1
ENSMUSG00000035954	Dock4	400923	-0.973117	-0.973965	3.43342	0.279117	1
ENSMUSG00000028150	Rorc	25483	0.975107	0.976123	3.17877	0.279472	1
ENSMUSG00000041324	Inhba	19771	-0.970031	-0.972138	2.14839	0.279635	1
ENSMUSG00000079037	Prnp	28502	-0.969671	-0.969738	7.06711	0.28217	1
ENSMUSG00000032400	Zwilch	35961	0.975249	0.975411	5.8087	0.282434	1
ENSMUSG00000044749	Abca6	74957	-0.978612	-0.979605	3.21195	0.283129	1
ENSMUSG00000051627	H1f4	1930	0.965765	0.970212	1.08321	0.283185	1
ENSMUSG00000028542	Slc6a9	40693	0.978276	0.978326	7.49491	0.283209	1
ENSMUSG00000070461	9230112E08Rik	3352	-0.965459	-0.968031	1.86252	0.283761	1
ENSMUSG00000080743	Gm7150	981	0.983262	0.992727	0.187901	0.283765	1
ENSMUSG00000055692	Tmem191c	7153	-0.973414	-0.976802	1.49469	0.28463	1
ENSMUSG00000106294	Gm8539	501	1.00161	1.01937	-0.562329	0.28513	1
ENSMUSG00000097378	B230208H11Rik	6474	0.958395	0.965952	0.383078	0.286196	1
ENSMUSG00000043644	0610009L18Rik	2533	-0.95825	-0.964474	0.634722	0.286648	1
ENSMUSG00000059939	9430015G10Rik	17284	0.982766	0.982915	5.94407	0.286882	1
ENSMUSG00000090053	Pakap	277770	-0.959357	-0.963399	1.20597	0.287017	1
ENSMUSG00000030867	Plk1	10435	0.966327	0.966423	6.54377	0.287023	1
ENSMUSG00000112381	Gm8170	945	-0.994054	-1.00548	-0.0764521	0.287303	1
ENSMUSG00000038072	Galnt11	44015	-0.96853	-0.969064	4.0909	0.288343	1
ENSMUSG00000067199	Frat1	2614	-0.955832	-0.960438	1.05133	0.289042	1
ENSMUSG00000028164	Manba	85794	-0.986745	-0.986872	6.17409	0.289516	1
ENSMUSG00000073179	Gm10478	400	-1.1093	-1.1256	-0.354065	0.289612	1
ENSMUSG00000041859	Mcm3	17345	0.960838	0.960866	8.31049	0.290265	1
ENSMUSG00000024799	Tm7sf2	5553	0.96411	0.96572	2.50527	0.290282	1
ENSMUSG00000021697	Depdc1b	91451	0.958771	0.959367	3.91822	0.290587	1
ENSMUSG00000032332	Col12a1	119841	-0.960406	-0.964676	1.15393	0.290588	1
ENSMUSG00000049832	Rbx1-ps	327	0.96135	0.971779	0.0156188	0.292452	1
ENSMUSG00000096370	Gm21992	68700	0.953346	0.956488	1.53986	0.292824	1
ENSMUSG00000104344	Gm38077	3245	-0.949565	-0.95366	1.19949	0.29562	1
ENSMUSG00000050555	Hyls1	9579	0.962572	0.963082	4.14703	0.296073	1
ENSMUSG00000023883	Phf10	16265	0.961543	0.961568	8.50646	0.296547	1
ENSMUSG00000082454	Gm12183	1848	-0.961569	-0.962416	3.40215	0.297336	1
ENSMUSG00000087095	Emx2os	33532	0.950501	0.9508	4.89606	0.297962	1
ENSMUSG00000037259	Dzank1	56858	-0.945089	-0.95083	0.739169	0.298033	1
ENSMUSG00000041773	Enc1	11930	-0.950641	-0.9508	5.79058	0.298969	1
ENSMUSG00000002325	Irf9	6460	-0.952299	-0.952893	3.91151	0.299817	1
ENSMUSG00000039478	Micu3	78851	-0.965298	-0.966118	3.46034	0.300533	1
ENSMUSG00000098113	Gm2445	989	0.933245	0.945874	-0.278723	0.300587	1
ENSMUSG00000040488	Ltbp4	32557	-0.951878	-0.952036	5.81076	0.301258	1
ENSMUSG00000114886	Gm48432	558	-0.945433	-0.956487	-0.0829113	0.301725	1
ENSMUSG00000091754	Gm3636	6648	-0.935835	-0.943531	0.348794	0.302539	1
ENSMUSG00000118252	Gm5521	801	-0.931571	-0.942931	-0.156131	0.302768	1
ENSMUSG00000023940	Sgo1	14548	0.969082	0.969186	6.44158	0.30292	1
ENSMUSG00000073434	Wdr90	16731	0.955781	0.955959	5.64505	0.303514	1
ENSMUSG00000022296	Baalc	75524	0.942127	0.944446	1.96863	0.303623	1
ENSMUSG00000033355	Rtp4	93932	-1.57948	-1.58364	2.05492	0.303979	1
ENSMUSG00000096351	Samd11	9295	0.928351	0.939328	-0.112765	0.305531	1
ENSMUSG00000001281	Itgb7	15950	1.00168	1.00171	8.23009	0.30591	1
ENSMUSG00000032440	Tgfbr2	91068	-0.943714	-0.943854	5.96227	0.306453	1
ENSMUSG00000102224	4930447F24Rik	4850	-0.94806	-0.948848	3.49124	0.306545	1
ENSMUSG00000078861	Zfp931	10782	-0.955184	-0.956174	3.19004	0.306576	1
ENSMUSG00000026121	Sema4c	9711	-0.964756	-0.965057	4.89637	0.306589	1
ENSMUSG00000074170	Plekhf1	11045	0.96846	0.968769	4.87182	0.306683	1
ENSMUSG00000002210	Smg9	23160	0.961111	0.961335	5.32526	0.306775	1
ENSMUSG00000028613	Lrp8	74972	0.947891	0.94807	5.61999	0.306853	1
ENSMUSG00000027342	Pcna	4153	0.947269	0.9473	8.11176	0.307607	1
ENSMUSG00000113831	Gm49602	2970	-0.931422	-0.937132	0.730688	0.308014	1
ENSMUSG00000053080	Zfta	8280	-0.950209	-0.95036	5.85959	0.308707	1
ENSMUSG00000025921	Rdh10	27961	0.970456	0.971054	3.92531	0.30902	1
ENSMUSG00000035506	Slc12a8	146808	0.975769	0.986633	-0.0129226	0.309291	1
ENSMUSG00000108449	Gm44507	48626	0.928357	0.938873	-0.0582925	0.310139	1
ENSMUSG00000023004	Tuba1b	3141	0.952929	0.952977	7.51789	0.310342	1
ENSMUSG00000078350	Smim1	5761	0.943264	0.944015	3.54059	0.310931	1
ENSMUSG00000032515	Csrnp1	13496	0.951098	0.951993	3.31393	0.312083	1
ENSMUSG00000046876	Atxn1	415254	-0.935805	-0.939616	1.2735	0.312146	1
ENSMUSG00000058006	Mdn1	118099	-0.961667	-0.961706	7.83347	0.312394	1
ENSMUSG00000098187	Gm8927	981	0.923488	0.930859	0.371682	0.312732	1
ENSMUSG00000091625	Lsm5	3648	0.943897	0.944077	5.6085	0.313197	1
ENSMUSG00000107096	Gm43597	7072	-0.937601	-0.940688	1.53679	0.313882	1
ENSMUSG00000085995	Gm2788	35133	0.940528	0.94475	1.12748	0.31421	1
ENSMUSG00000113637	Gm7049	1712	0.931437	0.940144	0.181818	0.314438	1
ENSMUSG00000053846	Lipg	21942	-0.946871	-0.955872	0.123868	0.314714	1
ENSMUSG00000068245	Phf11d	18064	1.06401	1.06553	2.73021	0.315235	1
ENSMUSG00000056144	Trim34a	17778	-1.01729	-1.02886	-0.0822359	0.315376	1
ENSMUSG00000054545	Ugt1a6a	84189	0.925029	0.928837	1.2381	0.315458	1
ENSMUSG00000028066	Pmf1	16189	0.967042	0.967164	6.20987	0.315505	1
ENSMUSG00000097543	Gm805	25762	0.930276	0.937305	0.45329	0.317095	1
ENSMUSG00000038056	Kmt2c	226986	-0.960077	-0.960286	5.41541	0.31761	1
ENSMUSG00000027242	Wdr76	38138	0.955069	0.955291	5.32431	0.318224	1
ENSMUSG00000078762	Haus5	11284	0.944919	0.947056	2.08612	0.318249	1
ENSMUSG00000110126	Gm9347	1607	0.922526	0.93249	-0.0156475	0.318446	1
ENSMUSG00000038679	Trps1	235712	-0.959474	-0.959645	5.70431	0.318558	1
ENSMUSG00000045287	Rtn4rl1	73987	-0.91437	-0.922977	0.149596	0.31981	1
ENSMUSG00000052105	Mtcl1	112769	-0.930283	-0.933036	1.68705	0.320079	1
ENSMUSG00000097954	Gm4217	1002	0.914507	0.924546	-0.0122601	0.320211	1
ENSMUSG00000027489	Necab3	14492	-0.918391	-0.921976	1.34145	0.321092	1
ENSMUSG00000090952	Gm17251	1900	-0.931901	-0.936067	1.12102	0.32162	1
ENSMUSG00000033576	Apol6	12378	-0.928479	-0.930341	2.2496	0.322372	1
ENSMUSG00000026077	Npas2	169506	-0.924415	-0.928316	1.19219	0.322453	1
ENSMUSG00000057143	Trim12c	14609	-0.924101	-0.925547	2.59913	0.323068	1
ENSMUSG00000074785	Plxnc1	153970	0.943081	0.945274	2.04576	0.323098	1
ENSMUSG00000022960	Donson	11963	0.952438	0.952789	4.66496	0.323198	1
ENSMUSG00000058773	H1f5	743	-0.967198	-0.975613	0.261297	0.323525	1
ENSMUSG00000094281	Gm8034	132	0.903929	0.915657	-0.234667	0.323744	1
ENSMUSG00000098222	Gm8318	872	0.916083	0.922047	0.641798	0.325646	1
ENSMUSG00000023048	Prr13	3779	0.940551	0.940642	6.57569	0.326568	1
ENSMUSG00000045193	Cirbp	6802	-0.926553	-0.92686	4.80161	0.326728	1
ENSMUSG00000033792	Atp7a	97651	-0.964502	-0.964932	4.3819	0.327004	1
ENSMUSG00000016637	Ift27	14645	0.959601	0.959983	4.55482	0.327531	1
ENSMUSG00000047757	Fancb	16681	0.929842	0.930413	3.93035	0.327608	1
ENSMUSG00000038390	Gpr162	5540	-0.999898	-1.00568	0.779299	0.327811	1
ENSMUSG00000021596	Mctp1	647671	-0.981534	-0.989642	0.296263	0.328347	1
ENSMUSG00000103697	Gm38020	4676	-1.03726	-1.05152	-0.236415	0.329959	1
ENSMUSG00000037466	Tedc1	9628	0.94191	0.942384	4.21326	0.330667	1
ENSMUSG00000118383	Gm50321	7999	-0.914343	-0.92553	-0.185949	0.330821	1
ENSMUSG00000024186	Rgs11	8374	-0.912429	-0.913194	3.47866	0.330847	1
ENSMUSG00000103400	Gm15853	2616	0.901842	0.90999	0.184581	0.330883	1
ENSMUSG00000091931	Gon7	4529	0.942516	0.944073	2.52231	0.332526	1
ENSMUSG00000060376	Bckdha	29036	-0.932672	-0.932804	6.03118	0.333282	1
ENSMUSG00000054612	Mgmt	235653	-0.923839	-0.92633	1.82166	0.333791	1
ENSMUSG00000086015	4833417C18Rik	2207	-0.901379	-0.907493	0.625261	0.333865	1
ENSMUSG00000110444	Gm10033	29030	-0.941631	-0.942053	4.37403	0.33393	1
ENSMUSG00000048218	Amigo2	3163	0.943061	0.947301	1.13055	0.334125	1
ENSMUSG00000120183	NA	3321	-0.925862	-0.92765	2.30615	0.334486	1
ENSMUSG00000097157	Gm26512	131035	-0.892232	-0.90204	-0.0169232	0.334565	1
ENSMUSG00000043004	Gng2	105069	0.921224	0.921513	4.87796	0.334935	1
ENSMUSG00000000730	Dnmt3l	21676	0.936059	0.938737	1.77999	0.335066	1
ENSMUSG00000097973	Gm4929	992	0.894744	0.905882	-0.173972	0.335141	1
ENSMUSG00000000058	Cav2	7931	0.927542	0.927628	6.63556	0.335317	1
ENSMUSG00000116838	Gm6475	1936	-0.894752	-0.904169	0.0105859	0.335809	1
ENSMUSG00000042293	Gm5617	531	-0.896102	-0.902326	0.552893	0.33597	1
ENSMUSG00000022865	Cxadr	58286	0.90351	0.903614	6.33706	0.336005	1
ENSMUSG00000025323	Sp4	66508	-0.93446	-0.935561	2.9953	0.336235	1
ENSMUSG00000031220	Awat2	40497	0.897955	0.905419	0.314451	0.336374	1
ENSMUSG00000068959	Zfp619	22655	-0.896203	-0.900325	1.11112	0.336768	1
ENSMUSG00000058672	Tubb2a	3734	-0.901695	-0.905974	1.03062	0.338566	1
ENSMUSG00000018604	Tbx3	14056	-0.917149	-0.917768	3.79409	0.338664	1
ENSMUSG00000006586	Runx1t1	150214	-0.925206	-0.925315	6.2881	0.339046	1
ENSMUSG00000106734	Gm20559	12938	-0.930356	-0.931857	2.55943	0.341099	1
ENSMUSG00000100510	Hand2os1	43117	-0.902069	-0.902113	7.53847	0.341708	1
ENSMUSG00000074652	Myh7b	23096	0.90207	0.914203	-0.31044	0.341786	1
ENSMUSG00000079494	Nat8f5	3755	0.966075	0.976975	-0.00339242	0.342026	1
ENSMUSG00000041308	Sntb2	83965	-0.95971	-0.959878	5.73505	0.34241	1
ENSMUSG00000063856	Gpx1	1441	0.950514	0.950612	6.49161	0.343553	1
ENSMUSG00000086240	Gm7846	274	1.06103	1.0732	0.00449049	0.344127	1
ENSMUSG00000027018	Hat1	52665	0.92244	0.922508	6.96611	0.34429	1
ENSMUSG00000044367	Slc16a13	4276	0.958693	0.958986	4.92568	0.344322	1
ENSMUSG00000045441	Gprin3	79069	0.944868	0.945027	5.78282	0.344753	1
ENSMUSG00000003032	Klf4	5324	0.891791	0.89182	8.14028	0.345183	1
ENSMUSG00000062846	Gm14176	477	0.917189	0.926018	0.113877	0.345473	1
ENSMUSG00000050730	Arhgap42	244777	-0.893717	-0.893898	5.50697	0.346416	1
ENSMUSG00000057265	Bbof1	33817	-0.885763	-0.890204	0.946864	0.346824	1
ENSMUSG00000006445	Epha2	28145	0.894029	0.894152	6.07403	0.347496	1
ENSMUSG00000038644	Pold1	16104	0.950383	0.950468	6.7022	0.347656	1
ENSMUSG00000042978	Sbk1	46155	-0.929628	-0.930264	3.77428	0.347851	1
ENSMUSG00000040296	Ddx58	36056	-0.891583	-0.891784	5.34946	0.347927	1
ENSMUSG00000032679	Cd59a	19554	-0.940465	-0.941066	3.86988	0.348202	1
ENSMUSG00000072235	Tuba1a	3867	0.906006	0.906068	7.05217	0.34872	1
ENSMUSG00000010051	Hyal1	4784	0.89817	0.905205	0.373395	0.349317	1
ENSMUSG00000084843	B230312C02Rik	15395	0.961245	0.978485	-0.586614	0.349326	1
ENSMUSG00000107734	Gm30055	803	-0.883076	-0.895042	-0.286657	0.349493	1
ENSMUSG00000023092	Fhl1	61560	-0.953395	-0.954251	3.38231	0.349511	1
ENSMUSG00000066026	Dhrs3	35383	-0.890469	-0.891502	3.00914	0.349742	1
ENSMUSG00000039629	Strip2	42670	0.876913	0.884637	0.215669	0.35021	1
ENSMUSG00000083061	Gm12191	348	-0.906682	-0.907709	3.04578	0.350254	1
ENSMUSG00000030004	Nat8	1695	0.881299	0.883274	2.09199	0.350371	1
ENSMUSG00000034616	Ssh3	7513	-0.881627	-0.883934	1.86531	0.350448	1
ENSMUSG00000039055	Eme1	8969	0.908193	0.908626	4.28564	0.350734	1
ENSMUSG00000061878	Sphk1	5751	-0.898395	-0.900358	2.1246	0.351986	1
ENSMUSG00000030641	Ddias	16723	0.925798	0.926299	4.11061	0.352052	1
ENSMUSG00000070271	Gm13268	433	-0.872588	-0.881821	-0.00760402	0.352133	1
ENSMUSG00000064341	mt-Nd1	957	-0.933506	-0.933508	12.5369	0.35225	1
ENSMUSG00000029201	Ugdh	22729	0.917615	0.917686	6.88253	0.352516	1
ENSMUSG00000041064	Pif1	8808	0.92116	0.921521	4.56925	0.353009	1
ENSMUSG00000105124	Gm5297	1171	0.872032	0.8846	-0.376184	0.353709	1
ENSMUSG00000070337	Gpr179	19969	0.878681	0.889075	-0.161926	0.354616	1
ENSMUSG00000056602	Fry	379109	0.916321	0.928852	-0.277929	0.354656	1
ENSMUSG00000015224	Cyp2j9	23150	0.935768	0.939444	1.31099	0.354741	1
ENSMUSG00000040936	Ulk4	321847	-0.901071	-0.905547	0.975742	0.354958	1
ENSMUSG00000017493	Igfbp4	13149	-0.946842	-0.946854	9.46638	0.356099	1
ENSMUSG00000020335	Zfp354b	9811	-0.862263	-0.871836	-0.0337025	0.35706	1
ENSMUSG00000050335	Lgals3	18410	0.896633	0.896652	8.74316	0.358071	1
ENSMUSG00000021176	Efcab11	191395	0.884559	0.886095	2.44366	0.35959	1
ENSMUSG00000071102	Gm10313	1002	0.86503	0.873262	0.141246	0.35977	1
ENSMUSG00000031996	Aplp2	62259	-0.949813	-0.949863	7.45939	0.360272	1
ENSMUSG00000038630	Zkscan16	14728	-0.894512	-0.897004	1.7835	0.360459	1
ENSMUSG00000024301	Kifc5b	15493	0.91087	0.911269	4.40906	0.360466	1
ENSMUSG00000056758	Hmga2	115195	0.918434	0.918577	5.88916	0.360632	1
ENSMUSG00000046057	Gm15428	333	0.859291	0.871001	-0.329298	0.360823	1
ENSMUSG00000016128	Stard13	196327	-0.914654	-0.914855	5.39528	0.363129	1
ENSMUSG00000001119	Col6a1	17377	-0.881891	-0.881904	9.29749	0.364005	1
ENSMUSG00000000792	Slc5a5	9869	0.857704	0.865655	0.177429	0.364281	1
ENSMUSG00000090625	Gm20721	16394	0.863931	0.865236	2.63028	0.364529	1
ENSMUSG00000038463	Olfml2b	38258	-0.865983	-0.86787	2.13243	0.36494	1
ENSMUSG00000102516	Gm38340	4008	-0.860626	-0.864697	1.06433	0.364981	1
ENSMUSG00000086704	Gm14582	37499	0.849292	0.860095	-0.201257	0.365585	1
ENSMUSG00000107937	Gm44200	4053	0.891342	0.905731	-0.501696	0.365893	1
ENSMUSG00000025069	Gsto2	20791	0.858386	0.8652	0.387304	0.367176	1
ENSMUSG00000026482	Rgl1	249592	-0.942176	-0.942679	4.11706	0.367579	1
ENSMUSG00000089726	Mir17hg	3849	-0.908804	-0.909643	3.3318	0.367763	1
ENSMUSG00000094595	Fsbp	7927	0.877445	0.881887	0.948471	0.368408	1
ENSMUSG00000097057	Gm17638	5453	0.856351	0.865539	0.0129625	0.368481	1
ENSMUSG00000022788	Fgd4	183633	-0.914415	-0.916264	2.21927	0.368631	1
ENSMUSG00000048782	Insc	106690	0.884419	0.88495	3.944	0.368836	1
ENSMUSG00000005667	Mthfd2	20218	0.897986	0.898031	7.50922	0.368878	1
ENSMUSG00000095597	Rps7-ps3	651	-0.90099	-0.901665	3.63483	0.36932	1
ENSMUSG00000086264	Gm15850	5057	0.851044	0.858665	0.20891	0.370127	1
ENSMUSG00000043833	2900005J15Rik	9179	-0.847603	-0.854636	0.33625	0.370684	1
ENSMUSG00000040253	Gbp7	19808	1.14974	1.16916	-0.506505	0.370892	1
ENSMUSG00000084941	Gm11944	11727	-0.843599	-0.853749	-0.16761	0.371449	1
ENSMUSG00000018293	Pfn1	2795	0.935904	0.935921	9.03615	0.371688	1
ENSMUSG00000044719	E230025N22Rik	11003	-0.847665	-0.854417	0.336373	0.372534	1
ENSMUSG00000083364	Llph-ps2	393	0.860886	0.870549	-0.0234985	0.372964	1
ENSMUSG00000054893	Zfp667	21305	-0.910483	-0.911103	3.77751	0.373016	1
ENSMUSG00000045128	Rpl18a	2691	-0.916546	-0.916554	10.0023	0.373662	1
ENSMUSG00000054793	Cadm4	22517	-1.01303	-1.02754	-0.368747	0.373758	1
ENSMUSG00000097981	Gm7583	1005	0.863129	0.866339	1.37557	0.37384	1
ENSMUSG00000042165	Gm9774	1392	0.881216	0.885639	0.98108	0.374047	1
ENSMUSG00000006356	Crip2	5271	-0.852848	-0.860011	0.247105	0.374283	1
ENSMUSG00000040424	Hipk4	7909	0.842502	0.849928	0.251564	0.374591	1
ENSMUSG00000028937	Acot7	93722	0.931068	0.931117	7.45133	0.375524	1
ENSMUSG00000097167	Gm16740	9238	-0.869076	-0.874982	0.576166	0.37585	1
ENSMUSG00000056043	Rgs9bp	6590	-0.846364	-0.848945	1.65914	0.376018	1
ENSMUSG00000051113	Garin5a	4906	-0.843999	-0.855615	-0.31856	0.377543	1
ENSMUSG00000030468	Siglecg	10155	0.871797	0.872281	4.06401	0.377931	1
ENSMUSG00000026958	Dpp7	4084	-0.896345	-0.896669	4.67149	0.378418	1
ENSMUSG00000087187	Gm13431	6314	-0.838821	-0.848452	-0.12653	0.378482	1
ENSMUSG00000052056	Zfp217	39461	-0.886077	-0.88616	6.61482	0.378571	1
ENSMUSG00000034845	Plvap	13988	0.857691	0.86269	0.786177	0.37869	1
ENSMUSG00000056899	Immp2l	928283	-0.917507	-0.919053	2.48179	0.3788	1
ENSMUSG00000121015	NA	2740	-0.83144	-0.841917	-0.21995	0.379637	1
ENSMUSG00000042807	Hecw2	388293	-0.844702	-0.845948	2.64178	0.379672	1
ENSMUSG00000078552	Dcdc2b	5927	-0.835369	-0.841928	0.385483	0.380356	1
ENSMUSG00000008489	Elavl2	150023	-0.901718	-0.903112	2.60225	0.380382	1
ENSMUSG00000020262	Adarb1	127545	-0.893916	-0.894172	5.00534	0.380653	1
ENSMUSG00000115700	Gm7517	1672	0.829872	0.838688	-0.0355705	0.381369	1
ENSMUSG00000039476	Prrx2	46280	-0.875673	-0.877219	2.41998	0.381374	1
ENSMUSG00000120764	NA	1678	-0.834689	-0.841836	0.280539	0.381601	1
ENSMUSG00000035337	Uchl4	1162	0.837209	0.846954	-0.105464	0.383969	1
ENSMUSG00000099881	2810013P06Rik	2194	-0.91378	-0.914621	3.34806	0.384123	1
ENSMUSG00000082675	Gm6382	942	0.826186	0.835875	-0.106283	0.384642	1
ENSMUSG00000024379	Tslp	4415	0.826991	0.836119	-0.0858374	0.384801	1
ENSMUSG00000019464	Ptger1	6076	-0.828117	-0.835201	0.264645	0.385992	1
ENSMUSG00000086451	4933431K23Rik	158823	-0.830073	-0.837326	0.205554	0.386491	1
ENSMUSG00000075289	Carns1	11156	-0.865893	-0.867991	1.97881	0.386714	1
ENSMUSG00000052396	Mogat2	19536	-0.834558	-0.835775	2.67861	0.386741	1
ENSMUSG00000100204	Gm4849	2246	0.823162	0.835896	-0.471468	0.386902	1
ENSMUSG00000000579	Dynlt1c	8104	0.852895	0.862	-0.00415767	0.386947	1
ENSMUSG00000056972	Magel2	4631	0.855875	0.859899	1.02491	0.387166	1
ENSMUSG00000098183	Gm27010	1412	0.827099	0.834715	0.145221	0.387606	1
ENSMUSG00000061684	Rpl21-ps8	483	-0.866058	-0.869259	1.36736	0.387898	1
ENSMUSG00000087298	Gm9392	554	0.82195	0.829766	0.165566	0.387927	1
ENSMUSG00000056458	Mok	33142	0.882229	0.885602	1.34443	0.390078	1
ENSMUSG00000048856	Slc25a47	20770	0.851062	0.853799	1.57136	0.390118	1
ENSMUSG00000101878	Gm8203	387	0.891793	0.89344	2.36009	0.391503	1
ENSMUSG00000036678	Aaas	12520	0.908492	0.90859	6.40337	0.392613	1
ENSMUSG00000082016	Pgam1-ps2	765	0.82293	0.834443	-0.334511	0.392963	1
ENSMUSG00000086754	Gm16098	2726	0.819933	0.825968	0.446644	0.393118	1
ENSMUSG00000117869	Snhg4	4946	-0.878791	-0.879182	4.3812	0.393396	1
ENSMUSG00000041144	Dnah7b	307236	-0.851643	-0.853382	2.18338	0.393465	1
ENSMUSG00000022385	Gtse1	16829	0.88346	0.883679	5.21941	0.393471	1
ENSMUSG00000005958	Ephb3	18551	-0.865977	-0.866193	5.19961	0.394209	1
ENSMUSG00000117839	Gm50251	674	0.848451	0.860478	-0.307335	0.394283	1
ENSMUSG00000039742	Garin1b	16880	0.836734	0.840035	1.32229	0.394677	1
ENSMUSG00000025001	Hells	40137	0.896364	0.896416	7.30155	0.394755	1
ENSMUSG00000025407	Gli1	12093	-0.878596	-0.879054	4.14366	0.395121	1
ENSMUSG00000098186	Gm7132	984	0.881737	0.893732	-0.307029	0.39595	1
ENSMUSG00000049502	Dtx3l	12641	-0.900955	-0.901306	4.56845	0.396189	1
ENSMUSG00000059474	Mbtd1	61134	-0.908251	-0.908404	5.77824	0.396213	1
ENSMUSG00000000028	Cdc45	31541	0.865597	0.865738	5.81507	0.396856	1
ENSMUSG00000027533	Fabp5	4060	0.847214	0.847327	6.09504	0.397766	1
ENSMUSG00000089671	Gm16537	8932	-0.809965	-0.824064	-0.55737	0.397838	1
ENSMUSG00000039157	Fam102a	34425	-0.834052	-0.835325	2.60957	0.398612	1
ENSMUSG00000117515	Gm6883	897	-0.854844	-0.859166	0.942411	0.399101	1
ENSMUSG00000029554	Mad1l1	312864	0.93531	0.935488	5.61055	0.399791	1
ENSMUSG00000034551	Hdx	127149	-0.897227	-0.898285	2.98725	0.400705	1
ENSMUSG00000120952	NA	1255	-0.833783	-0.83835	0.857969	0.402171	1
ENSMUSG00000104399	Gm37963	1124	0.813164	0.818845	0.511942	0.402275	1
ENSMUSG00000073856	Iqck	116901	0.8376	0.84187	0.963456	0.403096	1
ENSMUSG00000024978	Gpam	59971	-0.913114	-0.913248	5.97386	0.403396	1
ENSMUSG00000066357	Wdr6	6429	-0.872628	-0.87271	6.59989	0.403904	1
ENSMUSG00000070604	Vsig10l	8869	0.824612	0.827594	1.3984	0.404128	1
ENSMUSG00000020027	Socs2	31819	-0.812383	-0.815867	1.15396	0.404714	1
ENSMUSG00000020715	Ern1	93203	-0.871171	-0.871219	7.37812	0.40474	1
ENSMUSG00000010721	Lmbr1	148589	-0.903966	-0.90503	2.9801	0.404786	1
ENSMUSG00000031934	Panx1	43351	0.908605	0.909057	4.22342	0.40527	1
ENSMUSG00000074121	Ntf5	3485	-0.826312	-0.828165	2.08271	0.405466	1
ENSMUSG00000007035	Msh5	18141	0.81792	0.826299	-0.00434757	0.405688	1
ENSMUSG00000037827	Gm5884	1479	-0.8337	-0.844697	-0.236593	0.405728	1
ENSMUSG00000038256	Bcl9	94256	-0.911737	-0.911922	5.50053	0.405734	1
ENSMUSG00000040322	Slc25a24	45309	0.902183	0.902225	7.62207	0.408341	1
ENSMUSG00000057762	Gm6169	1030	0.836686	0.842679	0.507219	0.409009	1
ENSMUSG00000102263	Gm31415	22882	-0.79075	-0.802175	-0.430645	0.409192	1
ENSMUSG00000109231	Gm45737	1612	0.793108	0.800347	0.183229	0.409473	1
ENSMUSG00000106391	Gm42690	1901	-0.786685	-0.798831	-0.470797	0.409725	1
ENSMUSG00000046341	Gm11223	450	0.836853	0.840333	1.22707	0.410186	1
ENSMUSG00000027203	Dut	11419	0.905619	0.905707	6.576	0.410602	1
ENSMUSG00000022574	Naprt	3526	0.788058	0.798271	-0.243085	0.410739	1
ENSMUSG00000044005	Gls2	15548	0.923645	0.924095	4.2551	0.410798	1
ENSMUSG00000002020	Ltbp2	93321	0.80024	0.804411	0.926705	0.411164	1
ENSMUSG00000085037	4933421O10Rik	4182	-0.835818	-0.837118	2.58618	0.411736	1
ENSMUSG00000112854	Gm38403	6763	0.801054	0.802585	2.31303	0.412425	1
[truncated: 11,357 more rows]

## Sheet: sig_upreg genes_M1
gene_id	gene_name	width	logFC	unshrunk.logFC	logCPM	PValue	FDR
ENSMUSG00000002944	Cd36	107112	9.71547	9.88247	5.0548	1.01283e-09	9.63765e-06
ENSMUSG00000054932	Afp	18171	6.09522	6.12118	4.05723	3.11292e-09	1.0394e-05		bold ones are the top most significantly upregulated genes with an FDR of <0.05 (5%)
ENSMUSG00000032021	Crtam	34938	9.81251	10.2648	3.8596	6.36438e-09	1.70005e-05
ENSMUSG00000000184	Ccnd2	27032	9.64896	9.81595	4.9876	1.24708e-08	1.85066e-05
ENSMUSG00000034842	Art3	82802	5.95231	5.96602	4.82273	9.63441e-09	1.85066e-05
ENSMUSG00000021340	Gpld1	49350	4.17357	4.18074	3.97694	1.17672e-08	1.85066e-05
ENSMUSG00000045165	AI467606	2628	6.39339	6.45062	3.2421	1.41861e-08	1.8947e-05
ENSMUSG00000035783	Acta2	14501	6.26759	6.29496	4.14931	2.08346e-08	2.5297e-05
ENSMUSG00000032702	Kank1	197522	8.20491	8.4482	3.0573	2.69419e-08	2.99864e-05
ENSMUSG00000115149	9330188P03Rik	42600	9.73236	10.1846	3.78325	3.47222e-08	3.09166e-05
ENSMUSG00000025650	Col7a1	31290	3.62585	3.62804	5.12777	3.45974e-08	3.09166e-05
ENSMUSG00000019737	Syne4	4240	4.71596	4.73476	3.1537	5.01624e-08	4.1873e-05
ENSMUSG00000056498	Tmem154	38384	7.07052	7.15588	3.35915	7.98765e-08	5.23663e-05
ENSMUSG00000079685	Ulbp1	33277	5.07954	5.11592	2.58332	8.2337e-08	5.23663e-05
ENSMUSG00000032179	Bmp5	124947	7.0511	7.09832	4.15588	8.95646e-08	5.43738e-05
ENSMUSG00000050541	Adra1b	126605	6.41433	6.57965	1.81981	1.27847e-07	6.61105e-05
ENSMUSG00000086591	Dnah2os	5129	5.95653	6.02052	2.65123	1.56078e-07	7.44493e-05
ENSMUSG00000029468	P2rx7	47522	5.16149	5.18592	3.21594	1.6716e-07	7.69856e-05
ENSMUSG00000040528	Milr1	17569	4.36745	4.38478	2.92097	2.12837e-07	8.61409e-05
ENSMUSG00000003559	As3mt	33642	8.12754	8.37079	2.98232	3.1739e-07	0.000108694
ENSMUSG00000054263	Lifr	106876	2.38992	2.39047	5.83154	4.58847e-07	0.00014252
ENSMUSG00000018920	Cxcl16	6002	8.6779	9.12963	2.74775	4.93196e-07	0.000149707
ENSMUSG00000064267	Hvcn1	35494	3.30781	3.31619	2.89175	5.9593e-07	0.000169346
ENSMUSG00000117486	Gm30938	10436	7.90531	8.3564	1.98956	6.82136e-07	0.000177742
ENSMUSG00000024600	Slc27a6	56517	7.84074	8.29171	1.93957	6.92016e-07	0.000177742
ENSMUSG00000038188	Scarf1	13043	4.35153	4.36327	3.44787	6.89349e-07	0.000177742
ENSMUSG00000069793	Slfn9	13441	4.1453	4.14772	5.50176	6.80347e-07	0.000177742
ENSMUSG00000036168	Ccdc38	43696	5.45762	5.50404	2.61918	7.2293e-07	0.000178805
ENSMUSG00000120992	NA	3740	2.71679	2.7183	4.73513	7.13726e-07	0.000178805
ENSMUSG00000068617	Efcab1	74766	7.09241	7.33478	1.98233	8.16037e-07	0.000192064
ENSMUSG00000074676	Foxs1	1311	6.64177	6.88353	1.55488	1.0674e-06	0.000230147
ENSMUSG00000031497	Tnfsf13b	32606	4.71627	4.74992	2.34123	1.09663e-06	0.000230147
ENSMUSG00000034266	Batf	22419	4.23141	4.26074	2.04425	1.12236e-06	0.000230147
ENSMUSG00000051000	Fhip1a	157231	4.40996	4.45158	1.74797	1.28779e-06	0.00024571
ENSMUSG00000032554	Trf	26444	3.07465	3.07836	3.81068	1.39157e-06	0.000261771
ENSMUSG00000001435	Col18a1	114371	3.01793	3.02067	4.1845	1.45706e-06	0.000266582
ENSMUSG00000034786	Gpsm3	1949	2.88842	2.89321	3.25406	1.6477e-06	0.000289401
ENSMUSG00000056888	Glipr1	17184	7.58615	8.03683	1.67989	1.92427e-06	0.000313637
ENSMUSG00000037913	Tmem156	37787	7.25092	7.70107	1.36991	1.9256e-06	0.000313637
ENSMUSG00000120477	NA	11910	4.96732	5.01787	2.01805	2.04556e-06	0.000326495
ENSMUSG00000034898	Filip1	207758	2.85738	2.86373	2.82923	2.10232e-06	0.000326495
ENSMUSG00000028072	Ntrk1	16919	9.81162	1.44269e+08	2.00246	2.2109e-06	0.000326835
ENSMUSG00000023047	Amhr2	9267	4.72593	4.79721	1.33135	2.22777e-06	0.000326835
ENSMUSG00000042842	Serpinb6b	13859	4.38342	4.40856	2.40673	2.25134e-06	0.000326835
ENSMUSG00000037736	Limch1	311332	7.12142	7.57134	1.25167	2.33642e-06	0.000331971
ENSMUSG00000008153	Clstn3	34214	5.05089	5.06315	4.07679	2.42969e-06	0.000341589
ENSMUSG00000021990	Spata13	130556	4.08125	4.11043	1.90734	2.49774e-06	0.000347498
ENSMUSG00000086712	Mexis	8877	4.54002	4.59003	1.61907	2.68862e-06	0.000359092
ENSMUSG00000042607	Asb4	49637	9.62298	1.44269e+08	1.82356	3.13251e-06	0.000406192
ENSMUSG00000045377	Tmem88	1716	4.48048	4.54264	1.27598	3.37943e-06	0.000417922
ENSMUSG00000020758	Itgb4	33704	2.84573	2.85007	3.35904	3.3784e-06	0.000417922
ENSMUSG00000004266	Ptpn6	18008	2.56811	2.57003	4.234	3.47813e-06	0.000426183
ENSMUSG00000031502	Col4a1	114404	4.77873	4.78318	5.28183	3.7508e-06	0.000450861
ENSMUSG00000025383	Il23a	2614	4.19988	4.24484	1.45019	3.7808e-06	0.000450861
ENSMUSG00000023011	Faim2	31154	4.33692	4.33883	6.02688	4.26158e-06	0.000494936
ENSMUSG00000031790	Mmp15	22813	5.86533	6.02984	1.30431	4.57783e-06	0.000518243
ENSMUSG00000046709	Mapk10	303387	6.79985	6.96564	2.18933	4.95724e-06	0.000551741
ENSMUSG00000034881	Tbxa2r	6442	4.77865	4.82907	1.83488	5.24973e-06	0.000573727
ENSMUSG00000027208	Fgf7	56528	3.22746	3.2432	1.93801	5.28365e-06	0.000573727
ENSMUSG00000031216	Stard8	71481	5.88176	6.04623	1.33046	5.57978e-06	0.000591457
ENSMUSG00000027546	Atp9a	107972	6.77982	6.90593	2.52739	5.74252e-06	0.000594551
ENSMUSG00000038608	Dock10	257455	6.67394	7.12284	0.831613	5.8299e-06	0.000598954
ENSMUSG00000029859	Epha1	14782	9.68472	1.44269e+08	1.88836	5.93554e-06	0.000602179
ENSMUSG00000030257	Srgap3	229296	4.18369	4.19202	3.78291	6.09904e-06	0.000603399
ENSMUSG00000002257	Def6	20831	2.0953	2.096	5.15589	6.05912e-06	0.000603399
ENSMUSG00000024696	Lpxn	37615	3.31513	3.34009	1.39047	6.1898e-06	0.000607875
ENSMUSG00000038811	Gngt2	8519	3.8048	3.81567	3.03518	6.72316e-06	0.00064139
ENSMUSG00000045761	Togaram2	56409	5.73107	5.97088	0.699554	7.06468e-06	0.000659831
ENSMUSG00000050157	Gm867	2950	3.55322	3.56313	2.90402	7.04332e-06	0.000659831
ENSMUSG00000059325	Hopx	28134	3.13538	3.14113	3.24829	7.12729e-06	0.000661056
ENSMUSG00000052142	Rasal3	12925	8.90152	1.44269e+08	1.14	7.24105e-06	0.000666976
ENSMUSG00000056492	Adgrf5	99107	5.05462	5.06409	4.47678	7.6059e-06	0.000686381
ENSMUSG00000050600	Zfp831	67299	8.94965	1.44269e+08	1.19064	8.26151e-06	0.000711067
ENSMUSG00000059336	Slc14a1	42029	7.00496	7.45464	1.15102	8.20559e-06	0.000711067
ENSMUSG00000073400	Trim10	8260	9.01571	1.44269e+08	1.25277	8.36439e-06	0.000711559
ENSMUSG00000086995	Gm13544	10124	8.88379	1.44269e+08	1.11756	9.17859e-06	0.000775881
ENSMUSG00000032607	Amt	5450	2.28535	2.28749	3.77792	9.24429e-06	0.00077652
ENSMUSG00000078817	Nlrp12	30913	5.61876	5.85824	0.602038	9.41766e-06	0.000786139
ENSMUSG00000018169	Mfng	17594	2.28534	2.28634	4.87267	1.07405e-05	0.000874692
ENSMUSG00000068113	Tesl1	25055	6.68326	7.13219	0.849023	1.12399e-05	0.000898925
ENSMUSG00000038530	Rgs4	6166	4.77621	4.80603	2.55538	1.12327e-05	0.000898925
ENSMUSG00000028197	Col24a1	259534	5.60657	5.73126	1.41978	1.1419e-05	0.000902441
ENSMUSG00000047638	Nr1h4	79352	2.56148	2.56752	2.59885	1.1354e-05	0.000902441
ENSMUSG00000022871	Fetub	21445	2.37194	2.3756	3.10749	1.22711e-05	0.000947357
ENSMUSG00000018381	Abi3	12403	3.92254	3.9553	1.59205	1.28423e-05	0.000963604
ENSMUSG00000041117	Ccdc8	4809	6.47473	6.53205	3.30872	1.39348e-05	0.0010128
ENSMUSG00000001520	Nrip2	17132	5.99248	6.23297	0.962462	1.37707e-05	0.0010128
ENSMUSG00000047867	Gimap6	6644	5.64279	5.74346	1.73671	1.39038e-05	0.0010128
ENSMUSG00000039787	Cercam	13677	3.4823	3.49024	3.13606	1.39529e-05	0.0010128
ENSMUSG00000031283	Chrdl1	108589	1.91223	1.91267	5.62885	1.59385e-05	0.00112632
ENSMUSG00000054342	Kcnn4	16428	3.67117	3.67429	4.67866	1.64969e-05	0.00114756
ENSMUSG00000044313	Mab21l3	35884	4.399	4.55871	0.0162836	1.66615e-05	0.00115301
ENSMUSG00000044365	Cxxc4	25678	5.98843	6.43501	0.219315	1.76213e-05	0.00119467
ENSMUSG00000031304	Il2rg	3878	2.48494	2.48757	3.6931	1.77671e-05	0.00119847
ENSMUSG00000097154	Gm26510	50671	4.11866	4.15669	1.59105	1.8082e-05	0.00121358
ENSMUSG00000029304	Spp1	5933	3.12077	3.1214	6.40301	1.84091e-05	0.00122936
ENSMUSG00000027611	Procr	4355	2.0415	2.04287	4.15376	1.93991e-05	0.00126387
ENSMUSG00000031772	Cntnap4	312675	5.94553	6.18595	0.903554	1.99284e-05	0.00127963
ENSMUSG00000025494	Sigirr	9398	4.49043	4.57274	0.914451	2.01976e-05	0.00128014
ENSMUSG00000074570	Cass4	39964	4.00903	4.04417	1.60497	2.02238e-05	0.00128014
ENSMUSG00000027215	Cd82	44030	1.78561	1.78649	4.48568	2.01369e-05	0.00128014
ENSMUSG00000019027	Dnah1	63522	6.20266	6.65005	0.399926	2.08799e-05	0.00131543
ENSMUSG00000063672	Nkx6-3	5680	6.17724	6.62455	0.398764	2.18515e-05	0.00133859
ENSMUSG00000022148	Fyb	140461	4.90611	5.02926	0.777877	2.19017e-05	0.00133859
ENSMUSG00000030701	Plekhb1	19523	3.67909	3.70461	1.72497	2.1949e-05	0.00133859
ENSMUSG00000015053	Gata2	13142	2.86282	2.87344	2.12041	2.17164e-05	0.00133859
ENSMUSG00000029361	Nos1	177809	4.07654	4.12137	1.31157	2.21981e-05	0.00134733
ENSMUSG00000027261	Hao1	57008	3.8755	3.91615	1.27453	2.30003e-05	0.00137666
ENSMUSG00000039470	Zdhhc2	86454	1.91956	1.92061	4.39517	2.37585e-05	0.00140406
ENSMUSG00000085843	Kank4os	5133	2.46234	2.46746	2.72434	2.51428e-05	0.00146003
ENSMUSG00000025888	Casp1	8783	2.9049	2.91173	2.77934	2.71514e-05	0.00156984
ENSMUSG00000027016	Zfp385b	409006	2.5215	2.52679	2.73936	2.73545e-05	0.00157477
ENSMUSG00000070424	Art5	12611	3.8849	3.96521	0.377616	2.79978e-05	0.00158448
ENSMUSG00000018008	Cyth4	24973	3.70312	3.73177	1.5688	2.81412e-05	0.00158588
ENSMUSG00000090019	Gimap1	4742	8.05339	1.44269e+08	0.356802	2.99056e-05	0.00165734
ENSMUSG00000047013	Fbxo41	33421	8.5332	1.44269e+08	0.812112	3.18798e-05	0.00175945
ENSMUSG00000021213	Akr1c13	14447	3.24942	3.25588	3.19322	3.26227e-05	0.00179304
ENSMUSG00000106139	Gm30648	13291	5.78231	6.22793	0.0401831	3.33184e-05	0.00181633
ENSMUSG00000021211	Akr1c12	11258	3.04408	3.06264	1.52538	3.43931e-05	0.00185973
ENSMUSG00000085921	Gm13752	5629	3.04482	3.06503	1.41364	3.57615e-05	0.00191819
ENSMUSG00000119995	NA	19659	8.3264	1.44269e+08	0.598033	3.69167e-05	0.00197224
ENSMUSG00000020712	Tcam1	12074	2.75514	2.76043	2.99488	3.82427e-05	0.00201885
ENSMUSG00000026874	Hc	78108	5.68299	6.12815	-0.0333802	4.04378e-05	0.00210151
ENSMUSG00000042258	Isl1	11409	2.19999	2.20165	4.04724	4.11634e-05	0.00213092
ENSMUSG00000042115	Klhdc8a	8732	2.37353	2.37549	4.00258	4.26818e-05	0.00219253
ENSMUSG00000000409	Lck	25298	3.12871	3.13933	2.39541	4.72194e-05	0.00237986
ENSMUSG00000035493	Tgfbi	30040	2.63207	2.63258	6.19972	4.753e-05	0.00238651
ENSMUSG00000066720	Cldn9	1443	3.59333	3.60759	2.42874	4.83372e-05	0.00240893
ENSMUSG00000085757	Tslrn1	16473	2.84774	2.85322	3.01783	5.00334e-05	0.00247499
ENSMUSG00000108348	Pnma8c	5067	8.76469	1.44269e+08	0.991842	5.07857e-05	0.00250121
ENSMUSG00000001870	Ltbp1	386945	1.80118	1.8013	7.33829	5.15538e-05	0.00252217
ENSMUSG00000015476	Prrt1	3594	4.66947	4.83047	0.230796	5.43724e-05	0.00262165
ENSMUSG00000030510	Cers3	80188	3.52956	3.58906	0.455286	5.4361e-05	0.00262165
ENSMUSG00000034112	Atp2c2	57709	3.90574	3.92284	2.46927	5.67103e-05	0.00272454
ENSMUSG00000028111	Ctsk	10107	4.87237	4.87972	4.6631	5.80079e-05	0.00275568
ENSMUSG00000041633	Kctd12b	11238	4.11986	4.1811	0.960585	5.80602e-05	0.00275568
ENSMUSG00000025429	Pstpip2	92966	3.96158	4.02244	0.821013	5.88027e-05	0.00275568
ENSMUSG00000056749	Nfil3	13865	1.71312	1.71352	5.50942	5.87869e-05	0.00275568
ENSMUSG00000090839	Gm17094	52205	6.0329	6.47965	0.260371	5.95062e-05	0.0027789
ENSMUSG00000090066	1110002E22Rik	16455	5.1488	5.31149	0.638184	6.02169e-05	0.00279784
ENSMUSG00000023045	Soat2	12944	4.42488	4.46327	1.88884	6.03308e-05	0.00279784
ENSMUSG00000097254	C430042M11Rik	2744	4.06055	4.12164	0.912653	6.38464e-05	0.00293304
ENSMUSG00000000416	Cttnbp2	148366	7.51124	1.44269e+08	-0.112543	6.43858e-05	0.00294499
ENSMUSG00000060131	Atp8b4	179702	4.59043	4.71252	0.515872	6.71426e-05	0.00303985
ENSMUSG00000011382	Dhdh	17819	7.61923	1.44269e+08	-0.0237046	6.77174e-05	0.00304347
ENSMUSG00000052087	Rgs14	14956	2.68906	2.70934	1.05955	6.75604e-05	0.00304347
ENSMUSG00000028785	Hpca	10467	7.80869	1.44269e+08	0.153934	6.95857e-05	0.00309661
ENSMUSG00000031362	Xlr4c	9443	5.48093	5.71998	0.490169	6.97872e-05	0.00309661
ENSMUSG00000052551	Adarb2	565882	5.57119	6.01575	-0.122176	7.18232e-05	0.00316591
ENSMUSG00000034127	Tspan8	33062	7.94462	1.44269e+08	0.262136	7.30675e-05	0.00317879
ENSMUSG00000026586	Prrx1	68592	2.25903	2.25941	6.21427	7.29274e-05	0.00317879
ENSMUSG00000047497	Adamts12	284442	3.90458	3.95875	0.906807	7.39029e-05	0.0032047
ENSMUSG00000057000	Nxf3	13157	1.95603	1.95819	3.39671	7.46772e-05	0.00322779
ENSMUSG00000073599	Ecscr	9271	1.76415	1.765	4.52119	7.5097e-05	0.00323547
ENSMUSG00000022831	Hcls1	28230	7.37336	1.44269e+08	-0.225665	7.53504e-05	0.00323595
ENSMUSG00000106783	Chaer1	4383	3.97268	4.05337	0.448433	8.1406e-05	0.00344069
ENSMUSG00000039891	Txlnb	49440	3.32567	3.37272	0.554701	8.39988e-05	0.00351811
ENSMUSG00000044770	Scml4	100411	7.67594	1.44269e+08	0.0436693	9.0599e-05	0.00375789
ENSMUSG00000037033	Clca3b	26735	7.63152	1.44269e+08	-0.000268272	9.15523e-05	0.00378567
ENSMUSG00000024863	Mbl2	6746	7.90559	1.44269e+08	0.246578	0.000100847	0.00407596
ENSMUSG00000037337	Map4k1	21230	2.09708	2.09836	4.2998	0.000100743	0.00407596
ENSMUSG00000023947	Nfkbie	7467	1.5705	1.57118	4.6028	0.000101014	0.00407596
ENSMUSG00000026638	Irf6	18913	2.65675	2.67893	0.906895	0.000103512	0.00414032
ENSMUSG00000026726	Cubn	215476	2.41803	2.42148	3.24204	0.00010667	0.00422755
ENSMUSG00000052572	Dlg2	1972576	3.23708	3.27971	0.610018	0.000107267	0.00423862
ENSMUSG00000028348	Cavin4	9989	3.48955	3.52626	1.03897	0.00011386	0.00436987
ENSMUSG00000049044	Rapgef4	276235	2.5477	2.55819	1.81151	0.000114912	0.0043976
ENSMUSG00000048482	Bdnf	52308	1.90696	1.90787	4.57315	0.000118366	0.00450399
ENSMUSG00000030156	Cd69	8112	3.6093	3.76347	-0.616158	0.0001209	0.00456817
ENSMUSG00000011256	Adam19	91352	1.83887	1.84054	3.63236	0.000121079	0.00456817
ENSMUSG00000030020	Prickle2	335248	1.72634	1.72701	4.82284	0.000123487	0.00463283
ENSMUSG00000057948	Unc13d	15867	3.75382	3.76633	2.78522	0.000128334	0.00472183
ENSMUSG00000054580	Pla2r1	135766	4.37729	4.43919	1.1961	0.000135039	0.00491439
ENSMUSG00000051900	Abca16	135167	8.31395	1.44269e+08	0.60348	0.000144796	0.00517084
ENSMUSG00000031410	Nxf7	19223	4.49838	4.65857	0.1082	0.000144565	0.00517084
ENSMUSG00000026175	Vil1	26184	3.37882	3.42614	0.597489	0.000144271	0.00517084
ENSMUSG00000021136	Smoc1	159607	1.64307	1.6438	4.5875	0.000147268	0.00521727
ENSMUSG00000042359	Osbpl6	194140	2.67528	2.69388	1.15225	0.000166571	0.00571908
ENSMUSG00000039883	Lrrc17	32346	3.52642	3.54115	2.30335	0.000169649	0.00578986
ENSMUSG00000041180	Hectd2	66497	2.07086	2.07612	2.27229	0.000171843	0.00584004
ENSMUSG00000054418	2900041M22Rik	2611	6.92502	1.44269e+08	-0.594116	0.000172454	0.00584592
ENSMUSG00000027173	Depdc7	21095	1.77113	1.7733	3.1868	0.000173242	0.00585779
ENSMUSG00000092242	Gm20515	7725	8.1344	1.44269e+08	0.437174	0.000182288	0.00613319
ENSMUSG00000075402	Krt76	8570	4.35609	4.38739	2.07309	0.000184753	0.0061999
ENSMUSG00000039699	Batf2	31494	2.92837	2.98502	-0.0305196	0.000191294	0.00638731
ENSMUSG00000073535	Gm5532	7048	4.85614	5.09241	-0.0591696	0.000198043	0.00656448
ENSMUSG00000038045	Sult6b1	23055	2.99943	3.02505	1.04146	0.000198075	0.00656448
ENSMUSG00000054034	Tceal5	2929	7.08076	1.44269e+08	-0.45894	0.000200726	0.00663588
ENSMUSG00000038587	Akap12	93091	1.71365	1.71384	6.57243	0.000205587	0.00674648
ENSMUSG00000033147	Slc22a15	68678	1.97935	1.98437	2.24199	0.000207534	0.00679369
ENSMUSG00000040046	Tph1	27897	2.26927	2.27703	1.93852	0.000209486	0.00684082
ENSMUSG00000061601	Pclo	348542	6.87724	1.44269e+08	-0.639813	0.000216149	0.00699005
ENSMUSG00000022762	Ncam2	426132	4.27851	4.37603	0.492219	0.000215235	0.00699005
ENSMUSG00000072419	Dppa2	15816	4.17454	4.33297	-0.1701	0.000215874	0.00699005
ENSMUSG00000063919	Srrm4	152543	5.21017	5.65226	-0.444039	0.000219727	0.0070715
ENSMUSG00000109602	Gm31597	8220	4.11218	4.2323	0.11041	0.000220677	0.00708501
ENSMUSG00000115367	Gm33301	5496	7.03924	1.44269e+08	-0.499876	0.000221743	0.00708516
ENSMUSG00000069601	Ank3	628666	1.69541	1.6961	4.70754	0.000222842	0.00710329
ENSMUSG00000059173	Pde1a	295006	4.94803	5.11009	0.461657	0.000225384	0.00715017
ENSMUSG00000037813	D630003M21Rik	46690	3.91588	3.97008	0.907535	0.000228025	0.00719976
ENSMUSG00000025491	Ifitm1	2605	3.81116	3.82018	3.27831	0.000231341	0.00723605
ENSMUSG00000091971	Hspa1a	2967	3.41701	3.56936	-0.751233	0.000232308	0.00724931
ENSMUSG00000029838	Ptn	95292	5.05071	5.05285	6.57602	0.000235811	0.00734147
ENSMUSG00000035864	Syt1	513333	4.17277	4.22217	1.28749	0.000241119	0.00747188
ENSMUSG00000028558	Calr4	20087	4.6257	4.78641	0.196937	0.000245852	0.0075659
ENSMUSG00000022665	Ccdc80	34676	2.55977	2.56004	7.05093	0.000250304	0.00766572
ENSMUSG00000048502	Duxbl1	11512	3.45604	3.52344	0.213286	0.000261117	0.00792607
ENSMUSG00000028977	Casz1	150461	2.36215	2.3792	0.972045	0.000271306	0.00817961
ENSMUSG00000114585	Gm32401	57486	2.3951	2.41225	0.990952	0.000278437	0.0083757
ENSMUSG00000019762	Iyd	14638	3.24446	3.33664	-0.327154	0.000281977	0.00844415
ENSMUSG00000114541	Gm29680	37926	3.95419	4.11126	-0.333997	0.000288615	0.00862359
ENSMUSG00000024041	Cryaa	3927	5.13712	5.57866	-0.491793	0.000291498	0.00867225
ENSMUSG00000043102	Qrfp	4415	4.92027	5.08219	0.476676	0.000292192	0.00867225
ENSMUSG00000032561	Acpp	49498	6.68199	1.44269e+08	-0.780882	0.000298385	0.00881688
ENSMUSG00000058589	Anks1b	1099792	3.19368	3.25176	0.191705	0.000298249	0.00881688
ENSMUSG00000017057	Il13ra1	59150	2.18603	2.18699	4.82012	0.000307902	0.00901827
ENSMUSG00000020583	Matn3	24100	2.51463	2.5268	1.57212	0.000310349	0.00906317
ENSMUSG00000022146	Osmr	61393	1.65678	1.65739	4.85984	0.000328107	0.00948527
ENSMUSG00000086748	Gm13261	34759	7.57884	1.44269e+08	-0.0383481	0.00034615	0.00996374
ENSMUSG00000087400	Gm15270	47944	6.5864	1.44269e+08	-0.862756	0.000348028	0.00999625
ENSMUSG00000095493	A630023A22Rik	51629	5.06935	5.5105	-0.526854	0.000353621	0.0101351
ENSMUSG00000027273	Snap25	68976	6.54769	1.44269e+08	-0.892646	0.000359088	0.0102698
ENSMUSG00000049134	Nrap	70003	4.33498	4.45613	0.284145	0.00036219	0.0103143
ENSMUSG00000021638	Ocln	56212	2.98692	3.01972	0.684835	0.000367041	0.0104081
ENSMUSG00000057280	Musk	88344	6.98994	1.44269e+08	-0.544137	0.00038483	0.0107527
ENSMUSG00000019997	Ccn2	3242	2.44017	2.45076	1.68479	0.00039907	0.0111273
ENSMUSG00000073408	Mucl3	7944	3.69416	3.74775	0.726212	0.000405944	0.0112719
ENSMUSG00000037922	Bank1	272704	3.08309	3.1485	-0.0831699	0.000406957	0.0112766
ENSMUSG00000062077	Trim54	20919	6.64554	1.44269e+08	-0.809166	0.000435808	0.0119521
ENSMUSG00000097448	Platr22	29932	4.70655	5.14436	-0.809392	0.000445074	0.0121812
ENSMUSG00000010021	Kif19a	25352	6.68092	1.44269e+08	-0.781223	0.00047596	0.0127906
ENSMUSG00000057132	Rpgrip1	52843	4.54645	4.78081	-0.3179	0.000475676	0.0127906
ENSMUSG00000035105	Egln3	24880	1.8348	1.83514	5.89781	0.00047971	0.0128655
ENSMUSG00000010796	Asz1	58098	6.89624	1.44269e+08	-0.63412	0.000482026	0.0129017
ENSMUSG00000022488	Nckap1l	45017	2.46117	2.46832	2.24772	0.000517443	0.0137571
ENSMUSG00000021662	Arhgef28	306971	2.32707	2.34166	1.15246	0.000524083	0.0138882
ENSMUSG00000100437	Gm29152	2822	4.47834	4.91345	-0.98924	0.000533256	0.0140754
ENSMUSG00000026547	Tagln2	7334	2.12584	2.1264	5.52271	0.000538878	0.0141831
ENSMUSG00000038781	Stap2	8508	2.86485	2.88766	1.06026	0.000558935	0.0146133
ENSMUSG00000095180	Rhox5	5676	2.33422	2.35438	0.722399	0.000579652	0.0150619
ENSMUSG00000031075	Ano1	163426	4.60133	4.83611	-0.264077	0.000591129	0.0153063
ENSMUSG00000030345	Dyrk4	45820	2.42633	2.42797	4.32773	0.000591349	0.0153063
ENSMUSG00000073491	Ifi213	32992	3.85754	3.90183	1.13821	0.000598859	0.0154707
ENSMUSG00000057315	Arhgap24	416547	3.06354	3.0991	0.676847	0.000609427	0.0156831
ENSMUSG00000026303	Mlph	36058	2.43232	2.43699	2.82178	0.00061226	0.0157016
ENSMUSG00000052334	1700024B05Rik	59827	2.23781	2.24975	1.31391	0.000612888	0.0157016
ENSMUSG00000086765	Gm11827	4194	4.44577	4.6795	-0.369327	0.00067102	0.0169738
ENSMUSG00000084844	Hoxb3os	11715	2.43897	2.44907	1.7522	0.000677202	0.0170978
ENSMUSG00000009687	Fxyd5	9760	1.63819	1.63863	5.32364	0.000688384	0.0172496
ENSMUSG00000085682	Gm14267	22338	3.04016	3.13076	-0.479088	0.000698805	0.0174128
ENSMUSG00000092225	Gm2381	50406	2.09147	2.0943	3.1641	0.00073125	0.0181198
ENSMUSG00000053175	Bcl3	14309	1.75619	1.75948	2.57854	0.000748958	0.0184559
ENSMUSG00000030220	Arhgdib	18245	2.14987	2.15076	4.884	0.000752861	0.0185179
ENSMUSG00000029544	Cabp1	25693	2.17895	2.18202	3.14988	0.000760379	0.0186342
ENSMUSG00000036334	Igsf10	27660	3.33278	3.36251	1.15769	0.000829339	0.0200664
ENSMUSG00000121409	NA	62844	3.32686	3.37389	0.58447	0.000838322	0.0202105
ENSMUSG00000029417	Cxcl9	6733	4.31459	4.54739	-0.482024	0.000860336	0.0206295
ENSMUSG00000037846	Rtkn2	80171	1.87635	1.87742	4.32827	0.000901096	0.0214147
ENSMUSG00000039377	Hlx	5480	1.59603	1.59729	3.74752	0.000928177	0.0219411
ENSMUSG00000003051	Elf3	4994	3.04671	3.13736	-0.479762	0.000939172	0.0221227
ENSMUSG00000025856	Pdgfa	21357	1.40987	1.41022	5.36572	0.000986947	0.0230852
ENSMUSG00000003271	Sult2b1	54687	2.26245	2.26965	2.05208	0.000990748	0.0231336
ENSMUSG00000084807	Gm13073	691	3.35102	3.39386	0.714645	0.00101319	0.0235752
ENSMUSG00000024621	Csf1r	31552	2.98804	3.00994	1.24108	0.00105136	0.024294
ENSMUSG00000062310	Glrp1	10196	2.53813	2.54037	3.99301	0.00108393	0.0249174
ENSMUSG00000104225	4930517L18Rik	861	4.26779	4.50016	-0.523371	0.00110084	0.0251761
ENSMUSG00000037060	Cavin3	2218	1.58492	1.5853	5.45435	0.00112517	0.0256885
ENSMUSG00000022197	Pdzd2	380214	2.80901	2.88306	-0.450004	0.00113136	0.0257858
ENSMUSG00000120898	NA	5440	2.85277	2.9415	-0.6364	0.00115413	0.02626
ENSMUSG00000023913	Pla2g7	44104	2.84572	2.86637	1.20552	0.00117387	0.0265632
ENSMUSG00000031383	Dusp9	4096	1.62287	1.6234	5.01506	0.00121833	0.0274865
ENSMUSG00000047963	Stbd1	3539	2.02027	2.02137	4.44276	0.00122716	0.0276391
ENSMUSG00000000530	Acvrl1	16815	3.44212	3.47196	1.27224	0.00130267	0.0289975
ENSMUSG00000020437	Myo1g	14418	3.32667	3.36964	0.66763	0.00131049	0.0290747
ENSMUSG00000037447	Arid5a	16297	2.30877	2.30941	5.55845	0.00132514	0.0292538
ENSMUSG00000055044	Pdlim1	50670	1.64047	1.64357	2.5258	0.00134234	0.0295791
ENSMUSG00000053395	Cacng8	24966	2.05275	2.06365	1.25788	0.00135134	0.0296745
ENSMUSG00000078995	Zfp456	13698	2.52738	2.56679	0.04139	0.00139346	0.03046
ENSMUSG00000068323	Slc4a5	85118	3.44393	3.53736	-0.180657	0.0014147	0.0308233
ENSMUSG00000046634	Pkd1l1	146559	2.76723	2.83067	-0.306447	0.00142516	0.0309504
ENSMUSG00000032591	Mst1	4568	3.52205	3.53572	2.44938	0.0014965	0.0322375
ENSMUSG00000020229	Slc5a4a	41815	3.29004	3.3675	-0.0948427	0.0015007	0.0322701
ENSMUSG00000064125	Prr36	7917	3.34628	3.49787	-0.807374	0.0015287	0.0326678
ENSMUSG00000044337	Ackr3	12772	1.54402	1.54492	4.16147	0.00153256	0.0326978
ENSMUSG00000113769	5033406O09Rik	2494	2.22809	2.237	1.69154	0.00154169	0.0328403
ENSMUSG00000020682	Mmp28	22304	1.76447	1.76506	5.03318	0.00155033	0.0329716
ENSMUSG00000032122	Slc37a2	28154	1.81389	1.82041	1.69719	0.00165695	0.0350757
ENSMUSG00000021684	Pde8b	225883	3.85467	4.0831	-0.836624	0.00171788	0.035982
ENSMUSG00000026167	Wnt10a	12664	1.57377	1.57409	5.66913	0.00171722	0.035982
ENSMUSG00000044626	Liph	41847	1.87158	1.88054	1.31253	0.00173931	0.0362972
ENSMUSG00000031880	Rrad	3258	1.68617	1.68908	2.67401	0.00180041	0.0374552
ENSMUSG00000029378	Areg	8834	2.11229	2.12589	1.0034	0.00181914	0.0377861
ENSMUSG00000021010	Npas3	824019	1.88228	1.88864	1.8028	0.00182298	0.0378071
ENSMUSG00000006457	Actn3	16694	2.16113	2.17972	0.645858	0.00183368	0.0379699
ENSMUSG00000058656	Samd12	448728	2.51841	2.54405	0.589436	0.00187993	0.0388074
ENSMUSG00000023805	Synj2	103011	1.33669	1.33697	5.53354	0.00189791	0.0390578
ENSMUSG00000030000	Add2	95729	2.59953	2.65397	-0.278224	0.00194458	0.0397731
ENSMUSG00000014599	Csf1	19422	1.56002	1.56008	7.87289	0.00206251	0.041801
ENSMUSG00000026259	Ngef	97037	2.77652	2.82609	-0.00511715	0.0020737	0.0419642
ENSMUSG00000031129	Slc9a9	560537	2.26121	2.2743	1.22935	0.00207805	0.0419885
ENSMUSG00000114442	F630042J09Rik	4785	2.72843	2.79157	-0.324507	0.00209716	0.0423107
ENSMUSG00000100816	Gm28321	2327	2.38365	2.39953	1.07871	0.00213957	0.0431013
ENSMUSG00000020023	Tmcc3	279008	1.90896	1.91459	2.00108	0.00225493	0.0450851
ENSMUSG00000107709	9430018G01Rik	6340	3.12299	3.13577	2.1019	0.00231342	0.0459792
ENSMUSG00000051373	Plpp7	15293	1.57681	1.5797	2.54018	0.00243889	0.0479027
ENSMUSG00000047180	Neurl3	10083	3.20666	3.24274	0.770296	0.00247649	0.0485698
ENSMUSG00000007655	Cav1	35118	2.01701	2.01718	7.10528	0.00249617	0.0488501
ENSMUSG00000112527	Gm35696	19976	3.37287	3.48832	-0.480198	0.00254337	0.0495179
ENSMUSG00000020332	Meikin	56139	3.40629	3.49963	-0.196735	0.00261321	0.0508036
ENSMUSG00000023224	Serping1	10058	2.57793	2.58877	1.77932	0.00264581	0.0513625
ENSMUSG00000004655	Aqp1	12124	1.81279	1.81304	6.34774	0.00269388	0.0522199
ENSMUSG00000083668	Gm5648	1587	2.51507	2.55119	0.132624	0.0027748	0.0535552
ENSMUSG00000028159	Dapp1	50539	1.5222	1.52363	3.48294	0.00297758	0.0568935
ENSMUSG00000023918	Adgrf4	35394	2.33068	2.33167	4.93873	0.00299094	0.0570672
ENSMUSG00000022367	Has2	28913	1.97158	1.97312	3.89772	0.00301564	0.0574564
ENSMUSG00000028064	Sema4a	25224	1.53908	1.54187	2.55081	0.00305494	0.0581222
ENSMUSG00000090799	Klhl33	8926	1.66734	1.67086	2.37174	0.0032378	0.0610954
ENSMUSG00000026065	Slc9a4	50645	3.34286	3.40977	0.163522	0.00335428	0.062921
ENSMUSG00000049709	Nlrp10	8327	1.96505	1.97512	1.28055	0.00336571	0.0630468
ENSMUSG00000020601	Trib2	25196	1.37239	1.37294	4.65262	0.00339008	0.0633258
ENSMUSG00000044177	Wfikkn2	10050	2.58397	2.63241	-0.133763	0.0034243	0.0638756
ENSMUSG00000053297	AI854703	6926	2.357	2.38956	0.130982	0.00343222	0.063934
ENSMUSG00000026928	Card9	8743	2.18925	2.1942	2.48922	0.0035794	0.0661224
ENSMUSG00000049985	Ankrd55	95552	2.31995	2.36644	-0.341586	0.00390794	0.0715973
ENSMUSG00000009633	G0s2	1057	2.64186	2.66306	0.948352	0.00398032	0.0726246
ENSMUSG00000037224	Zfyve28	93557	2.55267	2.60683	-0.304543	0.00408173	0.0742719
ENSMUSG00000037010	Apln	9708	2.18933	2.19812	1.67592	0.00409479	0.0744082
ENSMUSG00000001661	Hoxc6	13625	1.99198	2.0033	1.14075	0.00415685	0.0752289
ENSMUSG00000096965	3300005D01Rik	4585	2.03855	2.07169	-0.202832	0.00417017	0.0752659
ENSMUSG00000098158	Gm4804	123368	2.3489	2.37381	0.472149	0.00425437	0.076682
ENSMUSG00000022489	Pde1b	27019	2.13178	2.14488	1.08679	0.00448143	0.0802332
ENSMUSG00000115050	Gm21154	26815	1.9449	1.95944	0.744589	0.00458577	0.0817725
ENSMUSG00000027890	Gstm4	4487	2.05231	2.0623	1.37462	0.00471315	0.08382
ENSMUSG00000050150	Slc9b1	49799	2.01327	2.03131	0.548673	0.00491627	0.0869691
ENSMUSG00000097028	Ptgs2os	25091	1.67913	1.6926	0.561261	0.00533221	0.0935835
ENSMUSG00000032911	Cspg4	34838	1.86486	1.865	7.20204	0.00541477	0.0949077
ENSMUSG00000019996	Map7	133120	1.84195	1.85046	1.34292	0.00597546	0.104053
ENSMUSG00000034738	Nostrin	53531	1.45068	1.45163	3.96994	0.00618343	0.107115
ENSMUSG00000038543	BC028528	8052	1.95277	1.95812	2.10414	0.00621612	0.107403
ENSMUSG00000042099	Kank3	12400	2.10648	2.12905	0.343998	0.00629528	0.108149
ENSMUSG00000086272	BC039966	2911	1.58556	1.59028	1.88119	0.00629863	0.108149
ENSMUSG00000086233	Gm11816	4686	2.5659	2.61996	-0.329317	0.00634119	0.10872
ENSMUSG00000035109	Shc4	96702	1.65545	1.66091	1.75642	0.00638814	0.109385
ENSMUSG00000070348	Ccnd1	9995	1.5603	1.56034	8.4659	0.00640502	0.109503
ENSMUSG00000049699	Ucn2	1155	2.87053	2.94497	-0.419789	0.00648795	0.110263
ENSMUSG00000086454	Platr14	12282	1.62866	1.62938	4.57589	0.00648204	0.110263
ENSMUSG00000026380	Tfcp2l1	57224	2.8256	2.87049	0.179704	0.00667154	0.112649
ENSMUSG00000032643	Fhl3	7911	1.34109	1.34138	5.52254	0.0067385	0.113492
ENSMUSG00000050439	Enthd1	112917	2.87125	2.94579	-0.404486	0.00676081	0.113725
ENSMUSG00000073650	Catip	7214	2.24645	2.30525	-0.671197	0.00683421	0.11467
ENSMUSG00000030708	Dnajb13	13245	2.04784	2.08401	-0.298458	0.00693415	0.116201
ENSMUSG00000024421	Lama3	249195	1.80756	1.81487	1.51362	0.0070914	0.118539
ENSMUSG00000046623	Gjb4	2996	1.87117	1.8925	0.174779	0.00760557	0.126343
ENSMUSG00000078956	Gm14221	88657	2.93718	2.98261	0.234808	0.00762767	0.126553
ENSMUSG00000107251	Gm43102	2324	3.01204	3.08763	-0.318887	0.00767517	0.127109
ENSMUSG00000022838	Eaf2	82120	1.59002	1.59657	1.42667	0.00769689	0.127227
ENSMUSG00000058420	Syt17	67506	1.99932	2.00304	2.66805	0.00786796	0.129574
ENSMUSG00000049775	Tmsb4x	2223	1.30369	1.30372	8.78134	0.00793417	0.130503
ENSMUSG00000005148	Klf5	16346	1.69361	1.69472	4.0501	0.00801669	0.131698
ENSMUSG00000017861	Mybl2	30002	1.51457	1.51477	6.26707	0.00809829	0.132876
ENSMUSG00000099528	2410012E07Rik	21022	1.38544	1.38698	3.20021	0.00838548	0.137251
ENSMUSG00000024912	Fosl1	8400	1.99518	1.99571	5.4643	0.00878475	0.143259
ENSMUSG00000043157	Arl11	2184	2.81937	2.83601	1.48371	0.00898778	0.146213
ENSMUSG00000030616	Sytl2	108468	2.15513	2.18906	-0.106757	0.00912574	0.148097
ENSMUSG00000030217	Art4	9283	2.82703	2.89086	-0.281483	0.00916136	0.148494
ENSMUSG00000001333	Sync	20943	2.00177	2.02061	0.482171	0.0092005	0.148948
ENSMUSG00000054247	Gm9939	2676	2.66915	2.74203	-0.546674	0.00939354	0.151889
ENSMUSG00000049916	2610318N02Rik	11770	1.3808	1.38251	3.03317	0.00979356	0.157404
ENSMUSG00000039457	Ppl	46131	1.5882	1.58869	5.08461	0.0100052	0.16042
ENSMUSG00000020598	Nrcam	273080	2.26564	2.29341	0.261826	0.0104362	0.166331
ENSMUSG00000027333	Smox	34427	1.45355	1.45397	5.13548	0.0104244	0.166331
ENSMUSG00000024512	Dynap	4154	1.90105	1.9098	1.39175	0.0105552	0.167828
ENSMUSG00000041828	Abca8a	70345	3.11807	3.15135	0.780815	0.010593	0.168228
ENSMUSG00000050357	Carmil2	11914	1.80634	1.82731	0.130327	0.0106157	0.168389
ENSMUSG00000046179	E2f8	15168	1.70683	1.70703	6.4843	0.0109857	0.173025
ENSMUSG00000013483	Card14	37608	2.27079	2.29693	0.302829	0.0120106	0.186094
ENSMUSG00000094151	Gm7233	8122	1.66077	1.66883	1.20808	0.0122577	0.189265
ENSMUSG00000031134	Rbmx	9507	1.19288	1.1931	5.72411	0.012396	0.190959
ENSMUSG00000029314	Gpat3	53390	1.51823	1.51878	4.8623	0.0128364	0.197288
ENSMUSG00000031662	Snx20	9566	1.5135	1.51647	2.41874	0.0130399	0.199921
ENSMUSG00000047810	Ccdc88b	13589	1.98887	2.02469	-0.329208	0.0132618	0.202197
ENSMUSG00000073530	Pappa2	268764	2.52373	2.56693	-0.0529356	0.013745	0.208331
ENSMUSG00000074818	Pdzd7	18812	1.98862	1.9946	2.01983	0.0137577	0.208331
ENSMUSG00000008384	Sertad1	3407	1.34815	1.34881	4.35681	0.0141082	0.212434
ENSMUSG00000046731	Kctd11	3146	1.26862	1.26962	3.6458	0.0142904	0.214693
ENSMUSG00000103144	Pcdhga1	180081	1.78981	1.80126	0.890694	0.0144712	0.216436
ENSMUSG00000054753	AU018091	14532	1.55772	1.56443	1.35776	0.014468	0.216436
ENSMUSG00000039384	Dusp10	62335	1.28458	1.28596	3.20369	0.0150177	0.223608
ENSMUSG00000050556	Kcnb1	94187	1.65597	1.66206	1.615	0.015038	0.223661
ENSMUSG00000034762	Glis1	200471	1.98855	2.00731	0.435387	0.0156499	0.231986
ENSMUSG00000028780	Sema3c	155988	1.73137	1.74813	0.348713	0.0161901	0.238933
ENSMUSG00000011148	Adssl1	21316	1.47389	1.47484	3.99061	0.0164211	0.241012
ENSMUSG00000022037	Clu	13065	2.26846	2.27421	2.35239	0.0164402	0.241027
ENSMUSG00000042515	Pwwp3b	28294	1.44996	1.45079	4.16278	0.0166109	0.242768
ENSMUSG00000044544	4921513I03Rik	13155	1.67248	1.68698	0.471713	0.0167105	0.243653
ENSMUSG00000033016	Nfatc1	106867	1.30986	1.3102	5.26116	0.01687	0.245442
ENSMUSG00000043460	Elfn2	51441	2.48746	2.53524	-0.225624	0.016982	0.246535
ENSMUSG00000042417	Ccno	2976	1.76675	1.78105	0.575068	0.0171349	0.248484
ENSMUSG00000017002	Slpi	35026	1.67704	1.69101	0.497652	0.0174772	0.252928
ENSMUSG00000078815	Cacng6	11473	2.28446	2.31231	0.277214	0.0185336	0.264742
ENSMUSG00000086688	Gm11560	948	1.52396	1.5297	1.53587	0.0186121	0.26558
ENSMUSG00000066607	Insyn1	11178	1.90868	1.91717	1.43209	0.0193897	0.275206
ENSMUSG00000000266	Mid2	103117	1.30023	1.30063	5.03544	0.0199881	0.282199
ENSMUSG00000109321	A330076H08Rik	52222	1.85276	1.86317	1.09845	0.0207472	0.2923
ENSMUSG00000051225	Fam83a	25591	1.89715	1.91473	0.433984	0.0217237	0.304131
ENSMUSG00000019966	Kitl	84787	1.6879	1.68966	3.39575	0.0225496	0.313394
ENSMUSG00000015468	Notch4	24236	1.6515	1.67151	0.0229141	0.0231366	0.32022
ENSMUSG00000109946	Brd3os	1898	1.22899	1.22967	4.1521	0.0254326	0.349103
ENSMUSG00000024659	Anxa1	17517	1.37503	1.37505	9.5484	0.0259705	0.355391
ENSMUSG00000024769	Cdc42bpg	19197	1.6317	1.64665	0.365484	0.027025	0.368312
ENSMUSG00000031750	Il34	64096	1.48626	1.50044	0.277598	0.0274421	0.373235
ENSMUSG00000049866	Arl4c	29097	1.29405	1.29428	5.79709	0.0277639	0.37608
ENSMUSG00000021365	Nedd9	177782	1.38437	1.38465	5.60053	0.0278279	0.376565
ENSMUSG00000108053	Gm43890	2799	1.56611	1.58067	0.324593	0.0278659	0.376697
ENSMUSG00000050022	Amz1	37313	1.48409	1.49505	0.618601	0.0281328	0.37992
ENSMUSG00000108158	Gm44002	594	2.41058	2.45781	-0.263809	0.0284583	0.38354
ENSMUSG00000029334	Prkg2	107579	1.28671	1.28692	5.85089	0.0285349	0.384186
ENSMUSG00000000958	Slc7a7	48339	1.31058	1.31307	2.40874	0.0290664	0.390554
ENSMUSG00000062007	Hsh2d	11890	1.81222	1.83578	-0.024264	0.0303882	0.404716
ENSMUSG00000025408	Ddit3	5515	1.79886	1.79917	5.99234	0.0303331	0.404716
ENSMUSG00000028634	Hivep3	404262	1.28465	1.28531	4.26841	0.0305498	0.406398
ENSMUSG00000001228	Uhrf1	20166	1.32499	1.32505	7.9983	0.0308223	0.409614
ENSMUSG00000047907	Tshz2	438804	1.22586	1.22616	5.33957	0.0309707	0.411177
ENSMUSG00000087434	Rab11fip4os1	16085	1.59295	1.6249	-0.592165	0.0311152	0.412686
ENSMUSG00000026430	Rassf5	68849	1.28922	1.29016	3.77694	0.0312178	0.413636
ENSMUSG00000023473	Celsr3	26650	1.49467	1.51017	0.18208	0.0321592	0.424844
ENSMUSG00000047428	Dlk2	5851	1.3598	1.36051	4.27332	0.032473	0.427721
ENSMUSG00000082450	Mageb7-ps	1041	1.25134	1.25294	2.94808	0.0325262	0.427908
ENSMUSG00000035158	Mitf	214298	1.19016	1.19099	3.80606	0.0325833	0.427908
ENSMUSG00000054855	Rnd1	14041	1.3608	1.36123	4.9707	0.0326994	0.429011
ENSMUSG00000019866	Crybg1	198218	1.71801	1.72209	2.24658	0.0332982	0.436438
ENSMUSG00000056313	Tcim	1805	2.15952	2.16782	1.71191	0.0344835	0.450647
ENSMUSG00000055333	Fat2	85956	1.68946	1.69705	1.34686	0.0345512	0.451091
ENSMUSG00000103662	Gm34294	4263	1.49609	1.5103	0.281196	0.0348139	0.454077
ENSMUSG00000062380	Tubb3	10592	1.59449	1.59469	6.40448	0.0355588	0.46334
ENSMUSG00000089901	Gm8113	8022	1.45413	1.46753	0.313019	0.035642	0.463971
ENSMUSG00000040329	Il7	43767	1.68413	1.70237	0.173297	0.036039	0.466864
ENSMUSG00000022842	Ece2	16658	1.44938	1.4576	0.94268	0.0367988	0.476245
ENSMUSG00000002108	Nr1h3	18774	1.22796	1.22926	3.2191	0.0369262	0.477431
ENSMUSG00000097812	Gm26812	10428	1.80807	1.83322	-0.0791495	0.0383253	0.494564
ENSMUSG00000121092	NA	534	1.52688	1.54019	0.415289	0.04046	0.518602
ENSMUSG00000116864	Gm3320	1031	1.48971	1.50144	0.52246	0.040608	0.520001
ENSMUSG00000047547	Cltb	18944	1.2001	1.20034	5.62944	0.0411075	0.524386
ENSMUSG00000032366	Tpm1	26817	1.31559	1.3156	9.78818	0.0413358	0.525291
ENSMUSG00000037621	Atoh8	29401	2.36137	2.36791	2.26938	0.0414315	0.525542
ENSMUSG00000016262	Sertad4	11269	1.20027	1.20066	4.89706	0.0414343	0.525542
ENSMUSG00000121016	NA	11026	1.33692	1.34297	1.21388	0.0415869	0.526977
ENSMUSG00000052512	Nav2	701375	1.44199	1.44277	4.24584	0.0431224	0.543343
ENSMUSG00000022346	Myc	4984	1.7752	1.77594	4.7353	0.0440081	0.552937
ENSMUSG00000027224	Duoxa1	11540	1.69882	1.72924	-0.405728	0.0442567	0.555016
ENSMUSG00000032548	Slco2a1	107291	1.40775	1.40792	6.32851	0.0455764	0.568895
ENSMUSG00000054474	Thnsl2	16274	1.84343	1.86865	-0.0776106	0.0457783	0.57035
ENSMUSG00000109394	A230057D06Rik	224172	1.42196	1.42467	2.44218	0.0461877	0.574379
ENSMUSG00000109455	Gm44710	13535	1.46126	1.47426	0.363808	0.0463619	0.575592
ENSMUSG00000086108	Gm5602	5046	1.63774	1.66755	-0.447459	0.0471143	0.583186
ENSMUSG00000044921	Rassf9	37515	1.95654	1.98906	-0.261572	0.0475358	0.587859
ENSMUSG00000071073	Lrrc73	3785	1.21169	1.21322	2.9659	0.0480394	0.592989
ENSMUSG00000089812	Gm15867	2029	1.36411	1.37493	0.49818	0.0481928	0.593785
ENSMUSG00000026525	Opn3	30356	1.45932	1.46752	0.977305	0.0486042	0.597944
ENSMUSG00000022805	Cfap91	44390	1.45739	1.46036	2.3712	0.0486199	0.597944
ENSMUSG00000032387	Rbpms2	30881	1.39387	1.40088	1.08469	0.0490408	0.602066
ENSMUSG00000074793	Hspa12b	19042	1.2634	1.26378	5.00967	0.0493649	0.605434

## Sheet: Sig_downregulated genes_m1
gene_id	gene_name	width	logFC	unshrunk.logFC	logCPM	PValue	FDR
ENSMUSG00000024087	Cyp1b1	13525	-5.61822	-5.62531	5.4297	1.44319e-09	9.63765e-06
ENSMUSG00000024529	Lox	13801	-10.7881	-10.9606	6.07622	2.21451e-09	9.859e-06		bold ones are the top most significantly down regulated genes with an FDR of <0.05 (5%)
ENSMUSG00000026748	Plxdc2	399536	-8.20455	-8.29318	4.41873	1.07446e-08	1.85066e-05
ENSMUSG00000015647	Lama5	49487	-5.89646	-5.90531	5.38929	3.40843e-08	3.09166e-05
ENSMUSG00000064325	Hhip	92156	-6.92149	-6.97507	3.84587	5.48433e-08	4.30875e-05
ENSMUSG00000027656	Ccn5	12286	-3.84391	-3.84643	5.14479	6.0451e-08	4.48546e-05
ENSMUSG00000056073	Grik2	693934	-3.3745	-3.37824	4.10668	6.71559e-08	4.7207e-05
ENSMUSG00000032419	Tbx18	28461	-4.49671	-4.51472	2.98881	9.5661e-08	5.55499e-05
ENSMUSG00000021719	Rgs7bp	109027	-6.81767	-6.88423	3.45515	1.09979e-07	6.12031e-05
ENSMUSG00000025927	Tfap2b	29663	-11.9083	-1.44269e+08	4.05824	1.28697e-07	6.61105e-05
ENSMUSG00000032291	Crabp1	8363	-13.7104	-1.44269e+08	5.85279	1.50138e-07	7.42684e-05
ENSMUSG00000025743	Sdc3	33783	-8.08375	-8.21468	3.76332	1.98295e-07	8.54332e-05
ENSMUSG00000006205	Htra1	49550	-4.02	-4.02546	4.22214	1.93791e-07	8.54332e-05
ENSMUSG00000022340	Sybu	116208	-3.95831	-3.96841	3.26238	2.07954e-07	8.61409e-05
ENSMUSG00000026676	Ccdc3	93103	-9.27232	-9.52377	4.06426	2.32684e-07	8.93215e-05
ENSMUSG00000045763	Basp1	50488	-3.82227	-3.83271	3.0823	2.34071e-07	8.93215e-05
ENSMUSG00000008575	Nfib	415578	-6.11812	-6.14372	4.09926	2.49108e-07	9.24189e-05
ENSMUSG00000040133	Gpr176	96310	-9.37937	-9.63085	4.17117	2.80883e-07	0.000100748
ENSMUSG00000028760	Eif4g3	215487	-6.93819	-7.00487	3.55491	2.86644e-07	0.000100748
ENSMUSG00000028532	Cachd1	252546	-2.95197	-2.95582	3.63814	3.84955e-07	0.000128038
ENSMUSG00000060969	Irx1	5803	-2.69306	-2.6939	5.54371	3.93047e-07	0.000128038
ENSMUSG00000021390	Ogn	16456	-5.63006	-5.63557	5.8004	4.52213e-07	0.00014252
ENSMUSG00000040209	Zfp704	183066	-9.62883	-10.0945	3.6406	5.36853e-07	0.000159338
ENSMUSG00000032289	Thsd4	555116	-4.87615	-4.9025	2.82819	5.91231e-07	0.000169346
ENSMUSG00000030790	Adm	2160	-11.3683	-1.44269e+08	3.52056	6.61512e-07	0.000177742
ENSMUSG00000039062	Anpep	39257	-8.7336	-8.98488	3.53263	8.27531e-07	0.000192064
ENSMUSG00000032009	Sesn3	58035	-8.22393	-8.35493	3.89615	8.34062e-07	0.000192064
ENSMUSG00000019894	Slc6a15	51595	-7.69108	-8.15531	1.74244	8.24033e-07	0.000192064
ENSMUSG00000033453	Adamts15	23298	-8.68634	-8.79215	4.65417	9.49015e-07	0.000214831
ENSMUSG00000024420	Zfp521	285775	-6.32199	-6.37057	3.39723	1.03022e-06	0.000229327
ENSMUSG00000071757	Zhx2	145168	-7.01344	-7.26342	1.85492	1.13613e-06	0.000230147
ENSMUSG00000020902	Ntn1	191460	-5.94715	-6.07651	1.68939	1.13729e-06	0.000230147
ENSMUSG00000026107	Nabp1	12564	-5.32584	-5.36366	2.76687	1.06857e-06	0.000230147
ENSMUSG00000026620	Mark1	102782	-8.56087	-8.66664	4.53369	1.17662e-06	0.000234551
ENSMUSG00000020325	Fstl3	5359	-4.98232	-5.05649	1.5043	1.20315e-06	0.000236314
ENSMUSG00000035948	Acss3	190152	-9.39441	-9.85996	3.40966	1.27716e-06	0.00024571
ENSMUSG00000064294	Aox3	87569	-13.4931	-1.44269e+08	5.63607	1.41305e-06	0.000262122
ENSMUSG00000071604	Fam189a2	58270	-4.97951	-5.04463	1.67896	1.55921e-06	0.000281417
ENSMUSG00000073565	Prr16	302312	-5.08281	-5.13046	2.22135	1.66846e-06	0.000289401
ENSMUSG00000021070	Bdkrb2	32012	-3.12027	-3.12435	3.70828	1.65247e-06	0.000289401
ENSMUSG00000020086	Macroh2a2	45483	-4.41615	-4.45065	2.00276	1.69204e-06	0.000289729
ENSMUSG00000031520	Vegfc	109491	-11.5396	-1.44269e+08	3.69366	1.7962e-06	0.000303671
ENSMUSG00000045620	Odf3l1	16021	-6.37154	-6.44721	2.81301	1.85864e-06	0.000310299
ENSMUSG00000006369	Fbln1	80587	-7.87345	-8.12431	2.68543	2.06714e-06	0.000326495
ENSMUSG00000013033	Adgrl1	41850	-4.72281	-4.72926	4.67421	2.09869e-06	0.000326495
ENSMUSG00000021943	Gdf10	14397	-12.4007	-1.44269e+08	4.5482	2.20566e-06	0.000326835
ENSMUSG00000057098	Ebf1	390775	-5.50897	-5.56758	2.33519	2.19547e-06	0.000326835
ENSMUSG00000020919	Stat5b	69994	-2.89323	-2.89794	3.28157	2.20556e-06	0.000326835
ENSMUSG00000025104	Hdgfl3	53223	-7.17713	-7.30771	2.86084	2.27724e-06	0.00032704
ENSMUSG00000040310	Alx4	38956	-10.1635	-1.44269e+08	2.33967	2.56994e-06	0.000353857
ENSMUSG00000024534	Sncaip	148227	-8.10633	-8.57104	2.14747	2.63317e-06	0.000358834
ENSMUSG00000014329	Bicc1	236869	-5.16403	-5.19194	3.02774	2.65982e-06	0.000358834
ENSMUSG00000056069	Otulinl	26511	-7.24067	-7.7042	1.31638	2.85468e-06	0.000377496
ENSMUSG00000039601	Rcan2	238166	-5.99327	-6.16336	1.37895	2.99054e-06	0.000391585
ENSMUSG00000051339	2900026A02Rik	134914	-10.351	-1.44269e+08	2.5227	3.26102e-06	0.000417922
ENSMUSG00000028036	Ptgfr	41129	-6.49463	-6.62456	2.22183	3.305e-06	0.000417922
ENSMUSG00000071847	Apcdd1	38949	-4.50771	-4.51362	4.58293	3.3574e-06	0.000417922
ENSMUSG00000095742	NA	NA	-7.70377	-8.16802	1.75738	3.76364e-06	0.000450861
ENSMUSG00000025795	Rassf3	65998	-6.79447	-7.25703	0.895505	3.98025e-06	0.000470444
ENSMUSG00000032024	Clmp	99358	-4.92531	-4.95467	2.71069	4.14445e-06	0.000485555
ENSMUSG00000027750	Postn	29929	-7.61237	-7.64423	5.26949	4.43829e-06	0.000511015
ENSMUSG00000051177	Plcb1	689192	-4.18213	-4.21433	1.85684	4.57867e-06	0.000518243
ENSMUSG00000038267	Slc22a23	166025	-6.03187	-6.13644	2.03176	4.64884e-06	0.000521764
ENSMUSG00000004043	Stat5a	25819	-3.29913	-3.31117	2.36267	5.22184e-06	0.000573727
ENSMUSG00000005397	Nid1	74719	-11.6493	-1.44269e+08	3.80296	5.57161e-06	0.000591457
ENSMUSG00000024501	Dpysl3	117303	-2.5164	-2.51989	3.32108	5.51728e-06	0.000591457
ENSMUSG00000075304	Sp5	2807	-10.9095	-1.44269e+08	3.0726	5.71063e-06	0.000594551
ENSMUSG00000029121	Crmp1	50194	-6.76319	-6.93441	2.09392	5.66582e-06	0.000594551
ENSMUSG00000025790	Slco3a1	279362	-7.05174	-7.5149	1.13854	5.95146e-06	0.000602179
ENSMUSG00000022330	Osr2	7208	-2.6511	-2.65335	4.08856	6.05964e-06	0.000603399
ENSMUSG00000033152	Podxl2	32487	-5.27434	-5.37778	1.33964	6.31711e-06	0.000615849
ENSMUSG00000046532	Ar	174447	-11.3818	-1.44269e+08	3.5381	6.38285e-06	0.000617749
ENSMUSG00000031586	Rbpms	147221	-4.62226	-4.64846	2.57588	6.43156e-06	0.000617985
ENSMUSG00000020123	Avpr1a	4954	-10.6021	-1.44269e+08	2.77	6.91655e-06	0.00065516
ENSMUSG00000041912	Tdrkh	21396	-9.39816	-1.44269e+08	1.59252	7.32698e-06	0.000670268
ENSMUSG00000096956	Snhg18	4138	-7.30813	-7.77178	1.38329	7.40941e-06	0.000673198
ENSMUSG00000075302	Erich2	32066	-10.8804	-1.44269e+08	3.04313	7.91644e-06	0.000700212
ENSMUSG00000059895	Ptp4a3	35622	-7.11741	-7.58071	1.20224	7.86432e-06	0.000700212
ENSMUSG00000033460	Armcx1	3955	-5.46654	-5.63558	0.870539	7.89582e-06	0.000700212
ENSMUSG00000029673	Auts2	1106013	-8.18482	-8.43586	2.99302	8.06641e-06	0.00070415
ENSMUSG00000039109	F13a1	183069	-5.72121	-5.73906	4.22612	8.01752e-06	0.00070415
ENSMUSG00000075012	Fjx1	3134	-6.73919	-7.20162	0.846899	8.30537e-06	0.000711067
ENSMUSG00000003949	Hlf	54360	-6.81624	-7.06586	1.68373	9.86466e-06	0.000818338
ENSMUSG00000051067	Lingo3	11239	-6.86089	-7.11076	1.70727	1.03879e-05	0.000851171
ENSMUSG00000038668	Lpar1	118644	-5.60847	-5.68347	2.10121	1.03614e-05	0.000851171
ENSMUSG00000048368	Omd	10361	-7.54152	-7.71335	2.85919	1.11875e-05	0.000898925
ENSMUSG00000021567	Nkd2	29098	-12.0143	-1.44269e+08	4.16496	1.17119e-05	0.000920142
ENSMUSG00000021250	Fos	3384	-3.74981	-3.7569	3.56038	1.18111e-05	0.000922509
ENSMUSG00000034656	Cacna1a	301608	-1.83271	-1.83297	6.31302	1.22399e-05	0.000947357
ENSMUSG00000028369	Svep1	164418	-10.8912	-1.44269e+08	3.05521	1.26033e-05	0.000955462
ENSMUSG00000002885	Adgre5	18076	-6.97316	-7.43615	1.06312	1.26622e-05	0.000955462
ENSMUSG00000031434	Morc4	50046	-6.39481	-6.85615	0.542488	1.25804e-05	0.000955462
ENSMUSG00000034731	Dgkh	174027	-4.18621	-4.22558	1.60827	1.25511e-05	0.000955462
ENSMUSG00000046058	Eid2	1392	-7.22848	-7.69199	1.30949	1.32671e-05	0.000989922
ENSMUSG00000057895	Zfp105	7957	-6.51649	-6.76583	1.37896	1.38612e-05	0.0010128
ENSMUSG00000026888	Grb14	112512	-10.3183	-1.44269e+08	2.4933	1.45471e-05	0.00105022
ENSMUSG00000031748	Gnao1	159423	-2.83254	-2.83734	3.19173	1.54033e-05	0.00110606
ENSMUSG00000038156	Spon1	277371	-8.29209	-8.42311	3.96459	1.56815e-05	0.00112001
ENSMUSG00000021994	Wnt5a	22699	-6.79497	-7.25753	0.883215	1.5845e-05	0.00112567
ENSMUSG00000039958	Etfbkmt	11323	-9.71874	-1.44269e+08	1.91097	1.61185e-05	0.00113305
ENSMUSG00000040596	Pogk	25242	-6.30141	-6.47208	1.65463	1.63266e-05	0.00114166
ENSMUSG00000049420	Tmem200a	166722	-6.91188	-7.04224	2.62	1.71508e-05	0.0011803
ENSMUSG00000002900	Lamb1	64411	-2.64187	-2.64225	6.62157	1.72326e-05	0.0011803
ENSMUSG00000026247	Ecel1	8867	-7.40549	-7.86931	1.47825	1.73546e-05	0.0011826
ENSMUSG00000020646	Mboat2	133519	-8.82963	-1.44269e+08	1.06094	1.87231e-05	0.00124411
ENSMUSG00000020689	Itgb3	62477	-2.01706	-2.01726	6.86828	1.9034e-05	0.00125851
ENSMUSG00000030222	Rerg	115673	-8.42483	-1.44269e+08	0.681934	1.91581e-05	0.00126047
ENSMUSG00000039683	Sdk1	974097	-5.6191	-5.69423	2.08899	1.93494e-05	0.00126387
ENSMUSG00000034957	Cebpa	2636	-10.4599	-1.44269e+08	2.63164	1.95753e-05	0.00126916
ENSMUSG00000017491	Rarb	388385	-4.14389	-4.16839	2.21803	1.97182e-05	0.00127225
ENSMUSG00000040729	Cep126	57834	-8.22348	-1.44269e+08	0.495347	2.1507e-05	0.00133859
ENSMUSG00000015217	Hmgb3	4759	-7.05249	-7.22398	2.37482	2.17933e-05	0.00133859
ENSMUSG00000001986	Gria3	277748	-5.87866	-6.33802	0.0706904	2.14525e-05	0.00133859
ENSMUSG00000036957	Lrfn3	7284	-6.4914	-6.95313	0.62341	2.22941e-05	0.00134733
ENSMUSG00000026672	Optn	43410	-5.59518	-5.84215	0.528	2.26903e-05	0.0013651
ENSMUSG00000032925	Itgbl1	315648	-9.64234	-1.44269e+08	1.83458	2.31145e-05	0.00137666
ENSMUSG00000051817	Sox12	4453	-6.05124	-6.18083	1.77144	2.31917e-05	0.00137666
ENSMUSG00000030499	Kctd15	17719	-6.25714	-6.50597	1.12273	2.43875e-05	0.00143489
ENSMUSG00000037138	Aff3	487630	-2.76406	-2.76511	5.30278	2.49296e-05	0.00146003
ENSMUSG00000062901	Klhl24	31680	-1.96109	-1.96148	5.85557	2.50898e-05	0.00146003
ENSMUSG00000032238	Rora	734461	-9.94426	-1.44269e+08	2.12859	2.77387e-05	0.0015765
ENSMUSG00000060548	Tnfrsf19	82616	-5.37386	-5.50223	1.14926	2.76594e-05	0.0015765
ENSMUSG00000024663	Rab3il1	36712	-2.80819	-2.81173	3.61723	2.77287e-05	0.0015765
ENSMUSG00000024598	Fbn2	201865	-11.7601	-1.44269e+08	3.91251	2.8609e-05	0.00160547
ENSMUSG00000042988	Notum	7388	-9.66031	-1.44269e+08	1.85401	2.88388e-05	0.0016116
ENSMUSG00000030306	Tmtc1	211960	-6.84304	-6.94818	2.84869	2.90054e-05	0.00161415
ENSMUSG00000049047	Armcx3	4861	-7.88795	-1.44269e+08	0.193217	3.2876e-05	0.00179956
ENSMUSG00000034171	Faah	50782	-2.15327	-2.15566	3.47196	3.38793e-05	0.0018394
ENSMUSG00000068758	Il3ra	9737	-8.53629	-1.44269e+08	0.788334	3.51704e-05	0.0018941
ENSMUSG00000062960	Kdr	45632	-8.28284	-8.32785	5.44487	3.71603e-05	0.00197734
ENSMUSG00000019906	Lin7a	149789	-7.91532	-1.44269e+08	0.220105	3.7646e-05	0.00199524
ENSMUSG00000060530	A930017M01Rik	132462	-4.44205	-4.5434	0.572692	3.94227e-05	0.00207295
ENSMUSG00000060044	Tmem26	59005	-7.84893	-1.44269e+08	0.161424	4.00173e-05	0.00209594
ENSMUSG00000025920	Stau2	291439	-4.23522	-4.33583	0.391987	4.01737e-05	0.00209594
ENSMUSG00000074220	Zfp382	13009	-7.69537	-1.44269e+08	0.0230878	4.16674e-05	0.00214869
ENSMUSG00000027221	Chst1	15544	-6.28996	-6.53887	1.16932	4.32195e-05	0.00221164
ENSMUSG00000019929	Dcn	38535	-4.45156	-4.45462	5.48125	4.42334e-05	0.00225489
ENSMUSG00000022656	Nectin3	110820	-8.98875	-1.44269e+08	1.19617	4.60144e-05	0.00232791
ENSMUSG00000054453	Sytl5	108922	-7.69863	-1.44269e+08	0.0243038	4.59183e-05	0.00232791
ENSMUSG00000036103	Colec12	175050	-13.0995	-1.44269e+08	5.24388	4.79611e-05	0.00239913
ENSMUSG00000079259	Trim71	57237	-5.98962	-6.15979	1.36363	4.89297e-05	0.00242939
ENSMUSG00000034684	Sema3f	28976	-6.3859	-6.63501	1.26334	5.0938e-05	0.00250121
ENSMUSG00000026110	Mgat4a	101677	-3.80334	-3.87458	0.442681	5.27282e-05	0.00257021
ENSMUSG00000062184	Hs6st2	294645	-5.52776	-5.77459	0.460954	5.34143e-05	0.00259419
ENSMUSG00000118365	Gm41724	48665	-3.91318	-3.95536	1.23316	5.72653e-05	0.00274135
ENSMUSG00000075028	Prdm11	74150	-5.83857	-6.29769	0.0531238	5.82079e-05	0.00275568
ENSMUSG00000028167	Bdh2	23206	-2.1683	-2.17008	3.92315	5.83984e-05	0.00275568
ENSMUSG00000038507	Parp12	31940	-9.52263	-1.44269e+08	1.72406	6.35676e-05	0.00293304
ENSMUSG00000020388	Pdlim4	14087	-4.07532	-4.12616	1.15584	6.3905e-05	0.00293304
ENSMUSG00000067212	H2-T23	3083	-6.91477	-7.37764	1.01853	6.64414e-05	0.00302444
ENSMUSG00000042659	Arrdc4	12247	-5.77035	-5.9401	1.15788	6.65757e-05	0.00302444
ENSMUSG00000106951	5930430L01Rik	5168	-7.73543	-1.44269e+08	0.0566803	6.79061e-05	0.00304347
ENSMUSG00000032184	Lysmd2	12031	-7.73755	-1.44269e+08	0.0574954	6.88682e-05	0.00307627
ENSMUSG00000037788	Vopp1	97353	-5.49553	-5.66463	0.893	7.03391e-05	0.00311076
ENSMUSG00000000782	Tcf7	30961	-2.74745	-2.76149	1.6195	7.24654e-05	0.00317327
ENSMUSG00000028487	Bnc2	400181	-2.41679	-2.41725	6.11423	7.23068e-05	0.00317327
ENSMUSG00000021388	Aspn	23123	-7.48612	-7.5745	3.72949	7.76498e-05	0.00332401
ENSMUSG00000037321	Tap1	9673	-5.93038	-6.39002	0.125261	7.85148e-05	0.0033503
ENSMUSG00000086515	Erich2os	6098	-7.60827	-1.44269e+08	-0.0478482	7.93506e-05	0.00336447
ENSMUSG00000043079	Synpo	66170	-5.01135	-5.0465	2.55774	7.91634e-05	0.00336447
ENSMUSG00000068874	Selenbp1	11703	-6.0473	-6.21749	1.43412	8.21771e-05	0.00346232
ENSMUSG00000019278	Dpep1	15571	-7.67724	-8.14136	1.75439	8.40279e-05	0.00351811
ENSMUSG00000021464	Ror2	176813	-9.55471	-1.44269e+08	1.75618	8.49176e-05	0.00354425
ENSMUSG00000029999	Tgfa	80497	-4.50832	-4.74998	-0.397603	8.88048e-05	0.00369494
ENSMUSG00000055737	Ghr	265733	-2.75815	-2.7614	3.67832	9.25938e-05	0.00381692
ENSMUSG00000046814	Gchfr	4618	-7.67493	-1.44269e+08	0.00602338	9.50534e-05	0.00390626
ENSMUSG00000025665	Rps6ka6	149768	-7.45357	-1.44269e+08	-0.187727	9.69262e-05	0.003971
ENSMUSG00000025586	Cpeb1	108440	-4.05608	-4.07664	2.35416	9.7524e-05	0.00398327
ENSMUSG00000066637	Ttc32	11992	-5.2771	-5.73291	-0.437047	9.96088e-05	0.00405602
ENSMUSG00000003526	Prodh	29847	-8.72613	-1.44269e+08	0.966762	0.000103539	0.00414032
ENSMUSG00000073591	Pcdhb22	6609	-2.86625	-2.87531	2.3477	0.000103526	0.00414032
ENSMUSG00000028469	Npr2	19310	-3.11838	-3.12767	2.56711	0.000104356	0.00416053
ENSMUSG00000035357	Pdzrn3	228289	-7.02815	-7.49127	1.12607	0.000106055	0.00421568
ENSMUSG00000031558	Slit2	324596	-8.22102	-1.44269e+08	0.488072	0.000108183	0.00424818
ENSMUSG00000072949	Acot1	8882	-4.7619	-4.83582	1.2781	0.000107882	0.00424818
ENSMUSG00000003617	Cp	52092	-2.91468	-2.91568	5.53885	0.000108463	0.00424818
ENSMUSG00000015202	Cnksr3	93175	-4.76179	-4.88863	0.58885	0.000109267	0.00426715
ENSMUSG00000026365	Cfh	99057	-7.10067	-7.56384	1.20733	0.000110734	0.00429932
ENSMUSG00000038296	Galnt18	308317	-4.46772	-4.59343	0.333676	0.000110587	0.00429932
ENSMUSG00000025875	Tspan17	7400	-6.58005	-7.04206	0.710599	0.000112371	0.00435021
ENSMUSG00000020553	Pctp	20230	-7.3955	-1.44269e+08	-0.230758	0.000112752	0.00435234
ENSMUSG00000031980	Agt	13173	-10.5279	-1.44269e+08	2.70145	0.000113791	0.00436987
ENSMUSG00000021047	Nova1	124413	-7.51587	-1.44269e+08	-0.13287	0.000116145	0.00443211
ENSMUSG00000029648	Flt1	164408	-3.19535	-3.22076	1.25949	0.000118827	0.00450866
ENSMUSG00000090946	Ccdc71l	4240	-7.48407	-1.44269e+08	-0.154974	0.000122326	0.0046022
ENSMUSG00000055745	Rtl6	4426	-7.93243	-1.44269e+08	0.234716	0.000124232	0.00463762
ENSMUSG00000111977	Gm47163	1665	-7.29983	-1.44269e+08	-0.311249	0.000124781	0.00463762
ENSMUSG00000016494	Cd34	22461	-3.28515	-3.28568	6.82616	0.000125003	0.00463762
ENSMUSG00000028211	Trp53inp1	17949	-2.29553	-2.29777	3.72362	0.000124659	0.00463762
ENSMUSG00000042834	Nrep	27011	-4.21379	-4.22418	3.48831	0.000126316	0.00467333
ENSMUSG00000026475	Rgs16	5120	-6.55112	-6.80053	1.42112	0.000126875	0.00468107
ENSMUSG00000037868	Egr2	6714	-3.60478	-3.61211	3.36843	0.000128739	0.00472373
ENSMUSG00000023067	Cdkn1a	9752	-4.56735	-4.6191	1.58812	0.000130217	0.00475184
ENSMUSG00000038718	Pbx3	201686	-1.87331	-1.87385	5.27995	0.000129948	0.00475184
ENSMUSG00000044576	Garem2	13218	-3.22855	-3.25717	1.1181	0.000136292	0.00494651
ENSMUSG00000032812	Arap1	64520	-1.66043	-1.6611	4.72273	0.000136894	0.00495488
ENSMUSG00000021792	Prxl2a	20049	-2.83706	-2.84439	2.58694	0.000138875	0.00501303
ENSMUSG00000043391	2510009E07Rik	45621	-7.82244	-1.44269e+08	0.142716	0.000140818	0.00506945
ENSMUSG00000079056	Kcnip3	65597	-3.04109	-3.05605	1.821	0.000146108	0.00520379
ENSMUSG00000020377	Ltc4s	2156	-3.31135	-3.33029	1.74948	0.000147096	0.00521727
ENSMUSG00000022221	Ripk3	3871	-6.94414	-1.44269e+08	-0.606369	0.000150638	0.00531716
ENSMUSG00000027070	Lrp2	161726	-2.31071	-2.31274	3.87504	0.000150884	0.00531716
ENSMUSG00000067158	Col4a4	138427	-5.02668	-5.27139	0.0482084	0.000151477	0.00532401
ENSMUSG00000027661	Slc2a10	16131	-3.20424	-3.2132	2.67895	0.000153116	0.0053675
ENSMUSG00000020728	Cep112	435424	-7.02908	-1.44269e+08	-0.534366	0.000153663	0.00537259
ENSMUSG00000032846	Zswim6	165447	-5.68248	-5.92977	0.629008	0.000154435	0.00538547
ENSMUSG00000061232	H2-K1	4331	-5.10605	-5.13729	2.7862	0.000155413	0.00540547
ENSMUSG00000034910	Pygo1	26537	-6.10264	-6.563	0.272694	0.000160014	0.00555104
ENSMUSG00000040260	Daam2	108322	-3.73887	-3.75192	2.68601	0.000160663	0.00555909
ENSMUSG00000039349	C130074G19Rik	11293	-8.72922	-1.44269e+08	0.972182	0.000162474	0.00560723
ENSMUSG00000039903	Eva1c	78391	-4.27757	-4.33433	1.21361	0.000163085	0.00561381
ENSMUSG00000053279	Aldh1a1	150751	-7.38942	-7.56111	2.72233	0.000167012	0.00571951
ENSMUSG00000060429	Sntb1	270562	-7.14053	-1.44269e+08	-0.441948	0.000169933	0.00578986
ENSMUSG00000016179	Camk1g	23953	-7.68208	-1.44269e+08	0.018	0.000182306	0.00613319
ENSMUSG00000032327	Stra6	90209	-2.9237	-2.93099	2.68754	0.000189805	0.00635348
ENSMUSG00000052949	Rnf157	76680	-2.74996	-2.76032	2.03697	0.000195396	0.00650799
ENSMUSG00000025161	Slc16a3	12389	-2.18904	-2.19127	3.61283	0.000203899	0.00672414
ENSMUSG00000028184	Adgrl2	174973	-2.94672	-2.9522	3.12006	0.000204954	0.00674227
ENSMUSG00000022206	Npr3	67392	-3.53728	-3.54418	3.39229	0.000212438	0.00692029
ENSMUSG00000022528	Hes1	3413	-4.59362	-4.59512	6.63587	0.000218533	0.00705008
ENSMUSG00000053414	Hunk	113541	-3.44745	-3.46124	2.34022	0.000221353	0.00708516
ENSMUSG00000054256	Msi1	26100	-2.68508	-2.7157	0.506181	0.0002245	0.00713909
ENSMUSG00000014813	Stc1	12567	-9.55408	-1.44269e+08	1.7574	0.000227393	0.00719684
ENSMUSG00000025150	Cbr2	2626	-3.9121	-3.93424	2.13695	0.000229813	0.007223
ENSMUSG00000025783	4930412O13Rik	2670	-3.84297	-3.94192	0.0791669	0.000229882	0.007223
ENSMUSG00000051331	Cacna1c	609651	-2.92513	-2.9282	3.93978	0.000230383	0.007223
ENSMUSG00000027171	Prrg4	19136	-6.66003	-1.44269e+08	-0.82665	0.000239069	0.00742559
ENSMUSG00000033715	Akr1c14	41678	-4.0487	-4.07314	2.12436	0.00024325	0.00752047
ENSMUSG00000033295	Ptprf	83193	-1.8396	-1.84136	3.55879	0.000245682	0.0075659
ENSMUSG00000040495	Chrm4	1440	-7.93071	-1.44269e+08	0.241725	0.000251179	0.00766572
ENSMUSG00000058897	Col25a1	468377	-5.22856	-5.30289	1.7785	0.000251391	0.00766572
ENSMUSG00000051242	Pcdhb9	3055	-4.12752	-4.25169	0.0664738	0.000250086	0.00766572
ENSMUSG00000022824	Muc13	25898	-4.06142	-4.10064	1.47001	0.000258654	0.0078692
ENSMUSG00000017446	C1qtnf1	21761	-2.68632	-2.68715	5.56268	0.000265407	0.00803803
ENSMUSG00000000197	Nalcn	350511	-7.29212	-1.44269e+08	-0.313898	0.000267533	0.00808409
ENSMUSG00000029231	Pdgfra	45924	-3.46091	-3.46143	7.01371	0.000280039	0.00840494
ENSMUSG00000050751	Pgbd5	70610	-8.28087	-1.44269e+08	0.556508	0.000291801	0.00867225
ENSMUSG00000024053	Emilin2	59807	-4.53068	-4.58238	1.57337	0.000299265	0.00882337
ENSMUSG00000074758	Gm5535	109176	-3.94976	-3.97296	2.10498	0.000301124	0.00885861
ENSMUSG00000085399	Foxd2os	12741	-6.71008	-1.44269e+08	-0.793969	0.000303335	0.00890403
ENSMUSG00000027335	Adra1d	16434	-4.42953	-4.5946	-0.0266138	0.000310792	0.00906317
ENSMUSG00000029359	Tesc	34136	-2.91358	-2.95628	0.293299	0.000312144	0.00908278
ENSMUSG00000036545	Adamts2	205490	-5.02187	-5.14949	0.826163	0.000323168	0.00938312
ENSMUSG00000062991	Nrg1	1070247	-4.45371	-4.57945	0.321669	0.000327859	0.00948527
ENSMUSG00000034613	Ppm1h	267034	-2.18675	-2.19365	2.01725	0.000339634	0.00979729
ENSMUSG00000017400	Stac2	16840	-4.09501	-4.25808	-0.286564	0.000361733	0.0103143
ENSMUSG00000020044	Timp3	49135	-3.34837	-3.35557	3.12898	0.000364349	0.0103537
ENSMUSG00000037990	Sh3rf3	325558	-4.64483	-5.09496	-0.918564	0.000370109	0.0104728
ENSMUSG00000087264	Gad1os	73418	-5.44329	-5.90026	-0.274454	0.000371966	0.0105031
ENSMUSG00000091243	Vgll3	51112	-1.78874	-1.78983	4.17552	0.000373761	0.0105315
ENSMUSG00000023885	Thbs2	28736	-1.53198	-1.53205	7.94692	0.000377067	0.0106023
ENSMUSG00000027820	Mme	144494	-10.1978	-1.44269e+08	2.38159	0.000380438	0.0106746
ENSMUSG00000031451	Gas6	29117	-5.21972	-5.2944	1.70881	0.00038378	0.0107458
ENSMUSG00000033102	Cdc14b	86023	-1.91905	-1.92274	2.58682	0.000402715	0.0112056
ENSMUSG00000051323	Pcdh19	106128	-7.68067	-1.44269e+08	-0.00143502	0.00041293	0.0114184
ENSMUSG00000000392	Fap	73133	-4.88584	-4.98839	1.00235	0.000419025	0.011563
ENSMUSG00000106847	Peg13	4725	-4.80864	-5.05226	-0.144039	0.000428408	0.0117976
ENSMUSG00000052632	Asap2	279713	-4.51068	-4.67624	0.0343132	0.000430734	0.0118372
ENSMUSG00000045658	Pid1	327885	-1.79943	-1.8002	4.69569	0.000457333	0.0124911
ENSMUSG00000002908	Kcnn1	21210	-2.86537	-2.87786	1.88267	0.000465818	0.012671
ENSMUSG00000050737	Ptges	40393	-2.74709	-2.77803	0.543186	0.000465591	0.012671
ENSMUSG00000028555	Ttc39a	38123	-3.15926	-3.25383	-0.463521	0.000467351	0.0126869
ENSMUSG00000026664	Phyh	19712	-4.57336	-4.65876	0.90709	0.000470144	0.0127314
ENSMUSG00000064339	mt-Rnr2	1582	-1.74502	-1.74504	9.91826	0.000470898	0.0127314
ENSMUSG00000069114	Zbtb10	34732	-1.61481	-1.61595	3.91412	0.000475148	0.0127906
ENSMUSG00000022358	Fbxo32	39054	-1.86715	-1.86777	5.08746	0.000513954	0.0137287
ENSMUSG00000038776	Ephx1	44695	-4.89424	-4.90828	3.70519	0.000516729	0.0137571
ENSMUSG00000044043	Pcdhb14	8695	-3.90181	-3.93568	1.52711	0.000518107	0.0137571
ENSMUSG00000020681	Ace	22020	-5.36899	-5.4726	1.43555	0.000526636	0.0139282
ENSMUSG00000041695	Kcnj2	10658	-8.09455	-1.44269e+08	0.374991	0.00053987	0.0141831
ENSMUSG00000022357	Klhl38	9597	-1.952	-1.9594	1.66299	0.000540521	0.0141831
ENSMUSG00000085183	Wincr1	34307	-1.65663	-1.65796	3.73435	0.000559106	0.0146133
ENSMUSG00000048249	Crebrf	60986	-1.61581	-1.61638	4.88964	0.0005677	0.014809
ENSMUSG00000035929	H2-Q4	5674	-4.65333	-4.89594	-0.287584	0.000571006	0.0148662
ENSMUSG00000043613	Mmp3	10154	-7.77551	-1.44269e+08	0.0899367	0.000605751	0.0156186
ENSMUSG00000056427	Slit3	587284	-4.04659	-4.06262	2.71991	0.000613673	0.0157016
ENSMUSG00000000142	Axin2	30435	-2.15168	-2.15283	4.51222	0.000618329	0.0157905
ENSMUSG00000032348	Gsta4	26576	-1.95196	-1.95716	2.1453	0.000638346	0.0162705
ENSMUSG00000052726	Kcnt2	365910	-2.44988	-2.45791	2.06921	0.000643458	0.0163696
ENSMUSG00000027219	Slc28a2	34661	-2.15673	-2.16703	1.44096	0.000648157	0.0164578
ENSMUSG00000037892	Pcdh18	14030	-2.46436	-2.46598	4.36725	0.000661834	0.0167732
ENSMUSG00000051506	Wdfy4	225962	-2.64946	-2.69089	0.0739975	0.000679906	0.0171336
ENSMUSG00000021186	Fbln5	72491	-4.22844	-4.32902	0.382085	0.00068708	0.0172496
ENSMUSG00000040152	Thbs1	15258	-3.25563	-3.2557	9.73338	0.000687642	0.0172496
ENSMUSG00000031994	Adamts8	21277	-8.73262	-1.44269e+08	0.97765	0.000696384	0.0174128
ENSMUSG00000025207	Sema4g	14297	-3.26674	-3.28911	1.46285	0.000698561	0.0174128
ENSMUSG00000021403	Serpinb9b	14469	-2.14653	-2.14746	4.80846	0.000705754	0.0175436
ENSMUSG00000009614	Sardh	59945	-1.73157	-1.73212	5.10049	0.000706683	0.0175436
ENSMUSG00000000296	Tpd52l1	113583	-4.81181	-5.05544	-0.143068	0.000738172	0.0182575
ENSMUSG00000020312	Shc2	19868	-1.86199	-1.86616	2.35205	0.000745109	0.018395
ENSMUSG00000040118	Cacna2d1	439821	-2.9294	-3.02194	-0.632621	0.000754323	0.0185197
ENSMUSG00000020717	Pecam1	96412	-1.8767	-1.87691	6.67072	0.000766488	0.0187495
ENSMUSG00000022353	Mtss1	140772	-1.87893	-1.87929	5.87593	0.000776614	0.0189625
ENSMUSG00000025255	Zfhx4	197332	-2.75639	-2.77037	1.6538	0.000797721	0.0194423
ENSMUSG00000029126	Nsg1	22716	-4.34595	-4.41894	0.901621	0.000801027	0.0194518
ENSMUSG00000024302	Dtna	244581	-1.68333	-1.68394	4.87661	0.00080015	0.0194518
ENSMUSG00000022203	Efs	9592	-1.82093	-1.82168	4.76163	0.000819713	0.0198695
ENSMUSG00000019785	Clvs2	112484	-2.38998	-2.39168	4.20925	0.000837077	0.0202105
ENSMUSG00000031837	Necab2	25922	-8.12743	-1.44269e+08	0.422022	0.000841753	0.0202567
ENSMUSG00000026883	Dab2ip	172729	-1.43904	-1.43932	5.67027	0.000850712	0.0204354
ENSMUSG00000106293	Gm42476	821	-4.14011	-4.37875	-0.686308	0.000865794	0.0207232
ENSMUSG00000047420	Fam180a	13474	-2.15247	-2.15387	4.2349	0.000868904	0.0207604
ENSMUSG00000029576	Radil	66260	-4.3018	-4.42683	0.201637	0.00088407	0.0210851
ENSMUSG00000044022	Pcdhb21	4705	-2.85222	-2.86315	2.06911	0.000885851	0.0210899
ENSMUSG00000007682	Dio2	14487	-3.54546	-3.54597	7.14257	0.000909611	0.0215786
ENSMUSG00000071047	Ces1a	27979	-2.81553	-2.90695	-0.71232	0.000913584	0.0216344
ENSMUSG00000040265	Dnm3	495582	-1.62095	-1.62221	3.77468	0.000934549	0.0220527
ENSMUSG00000020303	Stc2	12768	-8.38355	-1.44269e+08	0.63636	0.000961293	0.0226039
ENSMUSG00000024747	Aldh1a7	34610	-8.99047	-1.44269e+08	1.22435	0.000968715	0.0227171
ENSMUSG00000023033	Scn8a	176081	-8.08906	-1.44269e+08	0.385904	0.000969508	0.0227171
ENSMUSG00000020053	Igf1	78778	-5.03169	-5.04777	3.68167	0.000997785	0.0232573
ENSMUSG00000044162	Tnip3	108728	-2.95311	-2.95751	3.4398	0.00101727	0.023629
ENSMUSG00000000126	Wnt9a	26625	-3.4541	-3.5086	0.480213	0.00102649	0.0238017
ENSMUSG00000028565	Nfia	346141	-1.65563	-1.65729	3.42979	0.00103741	0.0240132
ENSMUSG00000028339	Col15a1	105007	-3.73969	-3.74803	3.33121	0.00107238	0.024737
ENSMUSG00000074037	Mc1r	3638	-3.35156	-3.44761	-0.314241	0.00108079	0.024888
ENSMUSG00000042367	Gjb3	5610	-2.39528	-2.40694	1.51432	0.00109134	0.0250445
ENSMUSG00000043719	Col6a6	140352	-10.4743	-1.44269e+08	2.65265	0.00110024	0.0251761
ENSMUSG00000021127	Zfp36l1	5260	-2.55285	-2.5531	7.16474	0.00115888	0.0263231
ENSMUSG00000000093	Tbx2	9398	-3.59258	-3.67434	0.0967787	0.0011738	0.0265632
ENSMUSG00000040093	Bmf	20931	-2.22576	-2.22719	4.28771	0.00117542	0.0265632
ENSMUSG00000054555	Adam12	348948	-7.37656	-1.44269e+08	-0.237397	0.00124503	0.0279943
ENSMUSG00000018427	Ypel2	57283	-1.95342	-1.95599	3.16025	0.00126737	0.0284487
ENSMUSG00000038042	Ptpdc1	47793	-4.3416	-4.46685	0.217853	0.00127641	0.0286036
ENSMUSG00000037235	Mxd4	13838	-1.99471	-1.99547	4.94066	0.0012899	0.0288576
ENSMUSG00000037370	Enpp1	74246	-9.40731	-1.44269e+08	1.62176	0.00129614	0.0289188
ENSMUSG00000054196	Cthrc1	10190	-8.72758	-1.44269e+08	0.975397	0.00129697	0.0289188
ENSMUSG00000022790	Igsf11	134489	-4.12	-4.19235	0.696384	0.00130608	0.0290249
ENSMUSG00000020423	Btg2	3951	-2.24053	-2.24303	3.50047	0.00131869	0.0292079
ENSMUSG00000068551	Zfp467	18129	-3.18108	-3.23445	0.27174	0.00132297	0.0292538
ENSMUSG00000026360	Rgs2	4824	-3.94078	-4.06401	-0.117701	0.0013443	0.0295791
ENSMUSG00000041774	Ydjc	16081	-2.72574	-2.74691	1.0168	0.00135308	0.0296745
ENSMUSG00000016194	Hsd11b1	42442	-3.87113	-3.88091	3.24413	0.00137045	0.030006
ENSMUSG00000026211	Obsl1	27143	-2.07581	-2.08176	2.09016	0.00141175	0.0308094
ENSMUSG00000052713	Zfp608	104508	-2.32485	-2.33018	2.53056	0.00141885	0.0308634
ENSMUSG00000087266	Gm15991	21283	-3.50576	-3.66406	-0.742157	0.00145558	0.0315596
ENSMUSG00000003477	Inmt	4418	-11.8512	-1.44269e+08	4.00563	0.00148116	0.0320623
ENSMUSG00000047033	Pcdhb15	2801	-1.84593	-1.8502	2.30582	0.00148814	0.0321612
ENSMUSG00000028517	Plpp3	75418	-2.06343	-2.06918	2.13254	0.00149481	0.0322375
ENSMUSG00000036446	Lum	7576	-11.8021	-1.44269e+08	3.95715	0.00150526	0.0322701
ENSMUSG00000101581	C430002N11Rik	16916	-3.3866	-3.48291	-0.296695	0.00150506	0.0322701
ENSMUSG00000037686	Aspg	20881	-3.28537	-3.30112	2.00944	0.00150847	0.0322871
ENSMUSG00000097960	A330074K22Rik	23797	-4.38434	-4.5098	0.265291	0.00159096	0.033782
ENSMUSG00000086416	Gm14002	9984	-2.68627	-2.72783	0.136532	0.00165714	0.0350757
ENSMUSG00000034771	Tle2	16285	-2.47075	-2.47358	3.57682	0.00169453	0.0357539
ENSMUSG00000060572	Mfap2	5567	-1.83651	-1.83792	3.88027	0.00169345	0.0357539
ENSMUSG00000038059	Smim3	27797	-3.93761	-4.0996	-0.437817	0.00171524	0.035982
ENSMUSG00000014603	Alx3	10746	-3.59365	-3.65548	0.442487	0.00171882	0.035982
ENSMUSG00000046807	Lrrc75b	10208	-2.81231	-2.84814	0.438461	0.00171454	0.035982
ENSMUSG00000026833	Olfm1	37745	-2.95721	-3.03496	-0.392647	0.00173536	0.0362715
ENSMUSG00000025993	Slc40a1	18456	-2.18177	-2.18212	6.25058	0.00178698	0.0372339
ENSMUSG00000030074	Gxylt2	106180	-1.7893	-1.78983	5.20587	0.00187281	0.0387202
ENSMUSG00000049907	Rasl11b	4196	-3.213	-3.21549	4.52871	0.00189219	0.0390002
ENSMUSG00000054626	Xlr	20589	-3.73945	-3.82178	0.236856	0.00191088	0.0392641
ENSMUSG00000003545	Fosb	7356	-1.9486	-1.95179	2.83498	0.0019193	0.0393766
ENSMUSG00000064343	mt-Tq	71	-2.4007	-2.4192	0.874505	0.00192937	0.0395224
ENSMUSG00000043313	Pcdhb19	7138	-2.67796	-2.69889	1.01137	0.00196024	0.040032
ENSMUSG00000095440	Fignl2	28374	-7.20951	-1.44269e+08	-0.379464	0.00199372	0.0406537
ENSMUSG00000050295	Foxc1	5844	-2.01284	-2.01372	4.75543	0.00200456	0.0408124
ENSMUSG00000034714	Ttyh2	45547	-2.01551	-2.01583	6.23281	0.00201671	0.0409972
ENSMUSG00000001240	Ramp2	13519	-1.75403	-1.75776	2.40151	0.00202285	0.0410595
ENSMUSG00000024610	Cd74	8805	-2.74209	-2.74275	5.94548	0.00215391	0.0433248
ENSMUSG00000029108	Pcdh7	415264	-1.34559	-1.34589	5.48478	0.00215748	0.0433313
ENSMUSG00000040430	Pitpnc1	262808	-1.81546	-1.81592	5.42833	0.00216456	0.0434083
ENSMUSG00000020034	Tcp11l2	37734	-1.7887	-1.78951	4.61265	0.00225426	0.0450851
ENSMUSG00000038486	Sv2a	14371	-2.01758	-2.02383	1.97544	0.00226905	0.0452997
ENSMUSG00000028214	Gem	10296	-3.7872	-3.90953	-0.234917	0.00227258	0.0453024
ENSMUSG00000045062	Pcdhb7	3501	-3.31953	-3.3886	0.0766629	0.00227993	0.0453812
ENSMUSG00000064371	mt-Tt	67	-2.02136	-2.03323	1.07198	0.00233486	0.0463364
ENSMUSG00000067924	Rtl8b	1232	-3.79462	-3.95555	-0.537836	0.00234559	0.0464802
ENSMUSG00000039155	Cdh26	56836	-8.19305	-1.44269e+08	0.4818	0.00235309	0.0465598
ENSMUSG00000039058	Ak5	205546	-2.14619	-2.15153	2.33715	0.00237797	0.0469437
ENSMUSG00000024339	Tap2	12795	-1.92214	-1.92667	2.30583	0.00238304	0.0469437
ENSMUSG00000031561	Tenm3	616270	-1.74629	-1.74639	7.5837	0.00238198	0.0469437
ENSMUSG00000086283	2810433D01Rik	4621	-2.50619	-2.55088	-0.142405	0.00238884	0.0469886
ENSMUSG00000079017	Ifi27l2a	1514	-3.54351	-3.5698	1.53475	0.0024981	0.0488501
ENSMUSG00000063687	Pcdhb5	3535	-1.64214	-1.64432	3.01636	0.00252494	0.0493028
ENSMUSG00000006344	Ggt5	27861	-6.13335	-6.19966	2.77733	0.00254118	0.0495179
ENSMUSG00000030218	Mgp	3389	-2.69744	-2.70605	2.24297	0.00270725	0.052403
ENSMUSG00000019647	Sema6a	133273	-3.39174	-3.43632	0.688779	0.00276869	0.0535147
ENSMUSG00000032377	Plscr4	35084	-1.65885	-1.65953	4.70759	0.00279643	0.0538948
ENSMUSG00000043631	Ecm2	27980	-3.22301	-3.30268	-0.194967	0.0029319	0.0564243
ENSMUSG00000026308	Klhl30	11401	-1.95178	-1.95482	2.8989	0.0029398	0.0564949
ENSMUSG00000095071	AF067061	1404	-2.92455	-2.96379	0.427458	0.00294741	0.0565598
ENSMUSG00000031722	Hp	4045	-5.15141	-5.17185	3.45786	0.00295809	0.0566833
ENSMUSG00000030688	Stard10	29541	-1.96129	-1.9632	3.57674	0.00297531	0.0568935
ENSMUSG00000028195	Ccn1	3006	-1.94629	-1.94648	6.91188	0.00306614	0.0582523
ENSMUSG00000032313	Tmem266	111433	-3.30412	-3.32739	1.4826	0.00310393	0.0588865
ENSMUSG00000030748	Il4ra	27355	-5.45545	-5.46537	4.79311	0.0031723	0.0600982
ENSMUSG00000034255	Arhgap27	32196	-1.86791	-1.8744	1.7395	0.0031925	0.0603953
ENSMUSG00000028698	Pik3r3	81439	-1.71171	-1.71323	3.62844	0.00323866	0.0610954
ENSMUSG00000073000	Gm10451	6840	-2.29226	-2.30721	1.07603	0.00324779	0.0611813
ENSMUSG00000029659	Medag	19975	-4.00401	-4.03811	1.61447	0.00333519	0.0627392
ENSMUSG00000020176	Grb10	108176	-3.49679	-3.55155	0.504494	0.00334505	0.0628362
ENSMUSG00000026932	Nacc2	67686	-1.58301	-1.58484	3.18661	0.00338853	0.0633258
ENSMUSG00000025175	Fn3k	15579	-2.87216	-2.89568	1.05071	0.00345419	0.0642537
ENSMUSG00000032735	Ablim3	112433	-2.67428	-2.70953	0.315132	0.00348107	0.0646636
ENSMUSG00000087006	Gm13889	1392	-3.14125	-3.22043	-0.27781	0.00351068	0.0651232
ENSMUSG00000025867	Cplx2	12569	-2.19267	-2.20158	1.67513	0.00352154	0.0652339
ENSMUSG00000070476	Fam217b	9905	-1.70516	-1.7073	3.13337	0.00352656	0.0652364
ENSMUSG00000007594	Hapln4	7406	-1.49186	-1.4923	5.13	0.00366828	0.0676706
ENSMUSG00000017344	Vtn	3234	-6.66602	-6.77103	2.68499	0.00369684	0.0681035
ENSMUSG00000034687	Fras1	410774	-3.00365	-3.02753	1.1533	0.00376103	0.0691906
ENSMUSG00000067586	S1pr3	14159	-3.4954	-3.54044	0.740301	0.00389612	0.0715771
ENSMUSG00000022371	Col14a1	213054	-2.31206	-2.31681	2.65745	0.00390748	0.0715973
ENSMUSG00000073988	Ttpa	22848	-1.82386	-1.83223	1.35194	0.00392404	0.0717937
ENSMUSG00000024164	C3	24167	-1.96565	-1.96797	3.29541	0.00395013	0.0721723
ENSMUSG00000026315	Serpinb8	20479	-2.37006	-2.39202	0.628716	0.00407053	0.0741692
ENSMUSG00000034457	Eda2r	43377	-1.5958	-1.60024	1.95238	0.0041027	0.0744507
ENSMUSG00000038756	Ttll6	31666	-2.13103	-2.14565	0.925415	0.00412342	0.0747251
ENSMUSG00000034059	Ypel4	4598	-2.29449	-2.30359	1.75171	0.00416409	0.0752579
ENSMUSG00000056771	Gm10010	12828	-1.80645	-1.80978	2.6132	0.00426035	0.0766862
ENSMUSG00000035131	Brinp3	407713	-1.51253	-1.51271	6.40144	0.0043078	0.077436
ENSMUSG00000033192	Lpcat2	63941	-2.87395	-2.90745	0.545293	0.00434981	0.078086
ENSMUSG00000026736	4930426L09Rik	2419	-2.23595	-2.26896	-0.0192355	0.00448081	0.0802332
ENSMUSG00000017417	Plxdc1	63207	-2.45037	-2.4821	0.257544	0.00449276	0.0803283
ENSMUSG00000031740	Mmp2	26130	-1.54663	-1.54666	8.91783	0.00455231	0.0812843
ENSMUSG00000046387	Pcdhb17	4660	-2.2167	-2.22395	1.98988	0.00462302	0.0823268
ENSMUSG00000028909	Ptpru	69832	-4.44004	-4.45011	3.75986	0.00479226	0.0851135
ENSMUSG00000038146	Notch3	46033	-2.65711	-2.66286	2.75431	0.00480582	0.085241
ENSMUSG00000036687	Tmem184a	17433	-1.5189	-1.52128	2.74505	0.00490013	0.0867986
ENSMUSG00000064346	mt-Tw	67	-1.80379	-1.80662	2.83244	0.00493995	0.0872724
ENSMUSG00000049999	Ppp1r3d	3267	-3.12688	-3.19491	-0.104533	0.00496453	0.0875909
ENSMUSG00000032285	Dnaja4	17443	-2.14359	-2.17001	0.166402	0.0050873	0.0896385
ENSMUSG00000006651	Aplp1	10554	-3.45156	-3.52136	0.140877	0.00515003	0.0905389
ENSMUSG00000021703	Serinc5	100857	-1.72235	-1.72346	4.0819	0.00515196	0.0905389
ENSMUSG00000047910	Pcdhb16	5225	-1.86409	-1.86703	2.85535	0.00545891	0.095556
ENSMUSG00000036181	H1f2	1560	-2.23449	-2.23492	6.02241	0.00557161	0.097401
ENSMUSG00000032232	Cgnl1	145094	-1.74465	-1.74483	6.71182	0.00569561	0.0994386
ENSMUSG00000074579	Lekr1	165128	-1.82053	-1.84014	0.213724	0.00587313	0.102404
ENSMUSG00000052353	Cemip	153646	-1.62782	-1.62987	3.09876	0.00598763	0.104129
ENSMUSG00000034780	B3galt1	556819	-1.66823	-1.67197	2.28559	0.00614331	0.106697
ENSMUSG00000022708	Zbtb20	766722	-1.38307	-1.38312	7.93191	0.00615465	0.106755
ENSMUSG00000036523	Greb1	130272	-3.72791	-3.73422	3.72866	0.00620103	0.107281
ENSMUSG00000022799	Arhgap31	114935	-1.36351	-1.36376	5.72297	0.00622576	0.10743
ENSMUSG00000004473	Clec11a	4216	-2.92534	-2.96472	0.394096	0.00629979	0.108149
ENSMUSG00000039239	Tgfb2	83198	-2.20274	-2.20357	5.04208	0.00628874	0.108149
ENSMUSG00000026094	Stk17b	29719	-1.44832	-1.44856	5.93645	0.00641147	0.109503
ENSMUSG00000028583	Pdpn	32134	-3.79541	-3.81312	2.28366	0.00646174	0.110221
ENSMUSG00000029287	Tgfbr3	183060	-1.66861	-1.66901	5.47246	0.00648899	0.110263
ENSMUSG00000022257	Laptm4b	46275	-1.57507	-1.57522	6.81376	0.00651196	0.110513
ENSMUSG00000001604	Tcea3	27170	-2.65195	-2.69756	-0.0551163	0.0065367	0.110792
ENSMUSG00000037206	Islr	48039	-2.06933	-2.07115	3.76797	0.00656215	0.111083
ENSMUSG00000026463	Atp2b4	101585	-1.54123	-1.54289	3.26778	0.00661935	0.111909
ENSMUSG00000095872	Gm15128	67466	-2.03987	-2.09103	-0.715244	0.00670579	0.113084
ENSMUSG00000022419	Deptor	146955	-1.45207	-1.45233	5.80864	0.00677753	0.113862
ENSMUSG00000029380	Cxcl1	1875	-3.32614	-3.32877	4.56323	0.00696833	0.116628
ENSMUSG00000083282	Ctsf	5789	-1.62114	-1.62343	2.92886	0.00711564	0.118796
ENSMUSG00000044786	Zfp36	3470	-2.47879	-2.48668	2.14277	0.0072446	0.120798
ENSMUSG00000033149	Phldb2	207356	-1.40483	-1.40488	8.34625	0.00731436	0.121809
ENSMUSG00000021221	Dpf3	273972	-2.70944	-2.73386	0.820257	0.00744342	0.123804
ENSMUSG00000032344	Cgas	12712	-2.09586	-2.14193	-0.561666	0.00768021	0.127109
ENSMUSG00000022548	Apod	18617	-10.2978	-1.44269e+08	2.48412	0.0077226	0.127495
ENSMUSG00000097601	Gm26660	63737	-1.47409	-1.47765	2.11646	0.00775982	0.127951
ENSMUSG00000082820	Gm13803	489	-1.83953	-1.87513	-0.48734	0.00824258	0.135077
ENSMUSG00000109111	6530437J22Rik	3875	-2.17741	-2.2374	-0.769853	0.0084254	0.137735
ENSMUSG00000059810	Rgs3	144155	-1.54782	-1.54819	5.42273	0.00864126	0.141091
ENSMUSG00000064368	mt-Nd6	519	-1.37837	-1.37852	6.58876	0.00896297	0.145987
ENSMUSG00000025089	Gfra1	220306	-1.9882	-1.98863	5.77717	0.00900483	0.146312
ENSMUSG00000024548	Setbp1	359012	-1.76279	-1.76361	4.55984	0.00946932	0.152929
ENSMUSG00000074896	Ifit3	5201	-5.59507	-5.61737	3.77396	0.00953396	0.153601
ENSMUSG00000002409	Dyrk1b	7826	-1.85845	-1.86798	1.1949	0.00952291	0.153601
ENSMUSG00000022773	Ypel1	17350	-1.75685	-1.75957	2.83508	0.00961656	0.154746
ENSMUSG00000106981	Gm45495	1700	-2.09168	-2.12952	-0.315772	0.00986221	0.158317
ENSMUSG00000024901	Peli3	13411	-1.65733	-1.66456	1.36666	0.0101045	0.161817
ENSMUSG00000025355	Mmp19	9915	-1.62788	-1.62943	3.48514	0.0102312	0.16365
ENSMUSG00000039976	Tbc1d16	85455	-1.34329	-1.34338	7.31376	0.010282	0.164266
ENSMUSG00000109857	Gm53058	19344	-2.09542	-2.12004	0.224584	0.0105409	0.167801
ENSMUSG00000046191	Pcdhb20	3559	-3.1747	-3.2149	0.627741	0.0107016	0.16955
ENSMUSG00000027901	Dennd2d	20626	-1.70153	-1.70466	2.5631	0.0108296	0.171374
ENSMUSG00000064372	mt-Tp	67	-1.43962	-1.44195	2.67414	0.0108802	0.171971
ENSMUSG00000020101	Vsir	25834	-1.7948	-1.79876	2.36022	0.0109073	0.172196
ENSMUSG00000020340	Cyfip2	119010	-1.40742	-1.40891	3.26497	0.0109595	0.172816
ENSMUSG00000027596	a	259611	-2.71734	-2.73937	0.989143	0.011102	0.17465
ENSMUSG00000068854	H2bc21	2620	-2.09559	-2.09857	3.08995	0.0112574	0.176887
ENSMUSG00000026109	Tmeff2	286624	-1.31825	-1.31939	3.52322	0.0112852	0.177115
ENSMUSG00000097324	Carmn	15913	-3.02767	-3.05173	1.14081	0.0113307	0.17762
ENSMUSG00000027204	Fbn1	207400	-1.82045	-1.82274	3.15265	0.0113809	0.178199
ENSMUSG00000047146	Tet1	104427	-1.36062	-1.36198	3.33178	0.0114042	0.178354
ENSMUSG00000092035	Peg10	13212	-2.25137	-2.26532	1.12416	0.0114381	0.178676
ENSMUSG00000017607	Tns4	23629	-2.70429	-2.73141	0.650134	0.0115244	0.179813
ENSMUSG00000005583	Mef2c	163047	-1.77569	-1.78709	0.89691	0.0116924	0.182222
ENSMUSG00000105366	Gm43719	2199	-2.33768	-2.34328	2.47055	0.0117665	0.183162
ENSMUSG00000022661	Cd200	26919	-3.27843	-3.34738	0.00921644	0.0118755	0.184429
ENSMUSG00000048644	Ctxn1	1615	-1.83707	-1.83874	3.63738	0.0118632	0.184429
ENSMUSG00000031714	Gab1	116082	-1.34919	-1.34992	4.21207	0.0119317	0.185086
ENSMUSG00000010461	Eya4	247823	-1.72952	-1.73769	1.27407	0.0120603	0.186648
ENSMUSG00000116305	Lncppara	53972	-1.88835	-1.89233	2.44906	0.0121135	0.187254
ENSMUSG00000052769	Gm9889	1591	-2.26481	-2.28891	0.393485	0.0122741	0.189299
ENSMUSG00000035112	Wnk4	16843	-2.56856	-2.58472	1.26515	0.0126227	0.194226
ENSMUSG00000115326	Gm35019	6722	-2.36825	-2.39269	0.50725	0.013052	0.199921
ENSMUSG00000002996	Hbp1	24282	-1.20909	-1.20927	6.04571	0.0130526	0.199921
ENSMUSG00000020836	Coro6	8074	-1.85501	-1.86233	1.58149	0.0131282	0.200848
ENSMUSG00000029096	Htra3	27760	-2.55464	-2.57272	1.10287	0.013194	0.201624
ENSMUSG00000006403	Adamts4	10217	-1.64714	-1.64859	3.61231	0.0132119	0.201666
ENSMUSG00000039963	Ccdc40	36667	-1.42314	-1.42632	2.21137	0.0132935	0.202449
ENSMUSG00000022324	Matn2	129597	-1.55127	-1.55145	6.49852	0.0133539	0.203138
ENSMUSG00000035441	Myo1d	297900	-1.46169	-1.46492	2.24266	0.013447	0.20432
ENSMUSG00000040124	Gorab	18762	-1.51812	-1.51828	6.61227	0.013568	0.205925
ENSMUSG00000025422	Agap2	17886	-1.87039	-1.87734	1.67929	0.0138719	0.209702
ENSMUSG00000024743	Syt7	64091	-1.68853	-1.70155	0.616798	0.0138824	0.209702
ENSMUSG00000063558	Aox1	76483	-1.5895	-1.5913	3.22725	0.0138953	0.209702
ENSMUSG00000087556	Gm15764	5316	-2.21294	-2.24343	0.0217758	0.013996	0.210983
ENSMUSG00000110559	Gm26843	41573	-2.18791	-2.23018	-0.369553	0.0141462	0.212767
ENSMUSG00000042671	Rgs8	47299	-2.0599	-2.07718	0.66404	0.0144543	0.216436
ENSMUSG00000038521	C1s1	12015	-1.4631	-1.46327	6.45322	0.0144364	0.216436
ENSMUSG00000006014	Prg4	16754	-3.99196	-4.01237	2.34181	0.0145296	0.217066
ENSMUSG00000026737	Pip4k2a	155872	-1.54496	-1.54529	5.61236	0.0146551	0.218696
ENSMUSG00000026923	Notch1	58761	-2.90257	-2.91824	1.64623	0.0148741	0.221717
ENSMUSG00000078190	Dnm3os	7928	-1.88632	-1.88648	7.0198	0.0154132	0.228987
ENSMUSG00000053646	Plxnb1	24529	-2.26597	-2.28877	0.490398	0.0155866	0.231305
ENSMUSG00000023034	Nr4a1	20527	-1.40646	-1.40701	4.68556	0.0158866	0.235235
ENSMUSG00000007613	Tgfbr1	61710	-1.23996	-1.24004	7.19708	0.0159236	0.235521
ENSMUSG00000014776	Nol3	5800	-1.40915	-1.41231	2.20181	0.0161898	0.238933
ENSMUSG00000024330	Col11a2	27249	-2.63516	-2.64792	1.63959	0.0163543	0.240559
ENSMUSG00000023411	Nfatc4	10800	-1.41525	-1.41578	4.75	0.0163323	0.240559
ENSMUSG00000024975	Pdcd4	37630	-1.33802	-1.33822	6.01444	0.0163469	0.240559
ENSMUSG00000048347	Pcdhb18	5041	-1.67257	-1.67662	2.17484	0.0164197	0.241012
ENSMUSG00000022103	Gfra2	89719	-1.46519	-1.46906	1.99171	0.016485	0.241418
ENSMUSG00000030157	Clec2d	5920	-3.11716	-3.16503	0.357153	0.0166135	0.242768
ENSMUSG00000031342	Gpm6b	150078	-3.19182	-3.20175	2.50675	0.0166401	0.242891
ENSMUSG00000118671	Eppk1	31066	-1.75801	-1.76768	1.085	0.0168272	0.245086
ENSMUSG00000022108	Itm2b	23064	-1.30927	-1.30935	7.36807	0.0169159	0.245842
ENSMUSG00000060961	Slc4a4	353168	-1.85913	-1.86539	1.77393	0.0174792	0.252928
ENSMUSG00000020684	Rasl10b	11903	-2.72037	-2.7776	-0.234532	0.017557	0.25332
ENSMUSG00000033170	Card10	27905	-1.60608	-1.6098	2.22334	0.017542	0.25332
ENSMUSG00000026043	Col3a1	38169	-2.35333	-2.35336	9.71755	0.0176468	0.254251
ENSMUSG00000056656	Apol8	9206	-3.08318	-3.12001	0.665358	0.0179265	0.257724
ENSMUSG00000042306	S100a14	1982	-2.11613	-2.1441	0.0644616	0.0179085	0.257724
ENSMUSG00000038453	Srcin1	66847	-2.31546	-2.3322	0.969993	0.0179656	0.258009
ENSMUSG00000073678	Pgap1	84691	-1.26748	-1.26798	4.64188	0.0179983	0.258201
ENSMUSG00000075020	Mir670hg	104395	-2.13072	-2.16882	-0.266676	0.018025	0.258307
ENSMUSG00000021217	Tshz3	75436	-1.59896	-1.6007	3.28887	0.0180569	0.258486
ENSMUSG00000031616	Ednra	61434	-1.4157	-1.41624	4.73501	0.0186391	0.265682
ENSMUSG00000027435	Cd93	6924	-1.79945	-1.81451	0.53742	0.0186937	0.266175
ENSMUSG00000003070	Efna2	10529	-1.40727	-1.40852	3.51609	0.0187989	0.267389
ENSMUSG00000019768	Esr1	394022	-2.11667	-2.11784	4.45395	0.0192705	0.273804
ENSMUSG00000102278	Gm37145	2756	-1.39183	-1.39528	2.05531	0.0194177	0.275311
ENSMUSG00000052565	H1f3	7425	-2.48915	-2.49546	2.47392	0.019828	0.28083
ENSMUSG00000053560	Ier2	1524	-1.2722	-1.27229	7.19175	0.0199058	0.281633
ENSMUSG00000121198	NA	720	-1.57996	-1.60267	-0.214024	0.0199579	0.282072
ENSMUSG00000051669	AU021092	10477	-1.63826	-1.63946	3.84822	0.020734	0.2923
ENSMUSG00000076431	Sox4	4795	-1.62683	-1.62699	6.7553	0.0207889	0.292577
ENSMUSG00000010307	Tmem86a	4177	-2.22059	-2.221	6.07396	0.0209393	0.294385
ENSMUSG00000039621	Prex1	147491	-2.04949	-2.05131	3.7564	0.0211092	0.296462
ENSMUSG00000020376	Rnf130	100374	-2.47644	-2.53951	-0.584476	0.02118	0.297143
ENSMUSG00000056367	Actr3b	90692	-1.3202	-1.32279	2.36738	0.0215163	0.301544
ENSMUSG00000005360	Slc1a3	76641	-1.73488	-1.73571	4.52179	0.0218885	0.306118
ENSMUSG00000117924	Tmem223	1480	-1.48661	-1.49414	1.10294	0.021916	0.306182
ENSMUSG00000043903	Zfp469	14031	-1.41432	-1.4144	7.61177	0.0220128	0.307213
ENSMUSG00000032135	Mcam	8259	-2.29658	-2.31403	0.864274	0.022072	0.307718
ENSMUSG00000041607	Mbp	110492	-1.67908	-1.68726	1.23312	0.0223817	0.311711
ENSMUSG00000030102	Itpr1	338014	-1.2177	-1.21791	5.80538	0.0224085	0.311758
ENSMUSG00000009281	Rarres2	3094	-1.98112	-1.99819	0.554367	0.0226249	0.314114
ENSMUSG00000116656	Gm49708	8048	-1.75425	-1.76758	0.657933	0.02278	0.315939
ENSMUSG00000019841	Rev3l	143094	-1.33003	-1.33019	6.39029	0.0229139	0.317466
ENSMUSG00000054426	A930005H10Rik	6569	-1.54945	-1.55559	1.46159	0.023596	0.326241
ENSMUSG00000045991	Onecut2	60968	-1.42126	-1.42165	5.20012	0.0237032	0.327383
ENSMUSG00000116180	Gm49492	2563	-1.83694	-1.86012	0.0257828	0.0239213	0.330055
ENSMUSG00000017740	Slc12a5	38930	-2.16043	-2.18273	0.424817	0.0242375	0.334073
ENSMUSG00000050359	Sprr1a	1944	-4.27091	-4.28743	2.94352	0.0243136	0.334775
ENSMUSG00000086003	B230206L02Rik	22362	-1.4908	-1.50615	0.170079	0.0252707	0.347238
ENSMUSG00000063193	Cd300lb	11606	-1.74424	-1.75516	0.901484	0.0256409	0.351602
ENSMUSG00000029671	Wnt16	10296	-1.50689	-1.51761	0.667862	0.025869	0.354366
ENSMUSG00000021559	Dapk1	161245	-1.52316	-1.52435	3.72659	0.0260474	0.356079
ENSMUSG00000029070	Mxra8	4409	-1.38198	-1.38212	6.65361	0.0264649	0.361416
ENSMUSG00000022723	Crybg3	110205	-1.53816	-1.55143	0.41192	0.0269739	0.367992
ENSMUSG00000071657	Bscl2	11217	-1.32712	-1.32913	2.73144	0.0273781	0.372744
ENSMUSG00000048455	Sprr1b	1981	-1.77212	-1.78975	0.319282	0.0275267	0.374005
ENSMUSG00000069874	Irgm2	23165	-2.64416	-2.65306	2.14117	0.0277389	0.37608
ENSMUSG00000042035	Igsf3	85977	-1.5085	-1.51177	2.29494	0.0288095	0.387492
ENSMUSG00000022231	Sema5a	451532	-1.39542	-1.39565	5.94451	0.0291746	0.391614
ENSMUSG00000055148	Klf2	2624	-1.40314	-1.40468	3.21212	0.0295638	0.396439
ENSMUSG00000105708	Gm36070	4336	-1.61062	-1.63505	-0.266743	0.0299943	0.401406
ENSMUSG00000033350	Chst2	7431	-2.68031	-2.722	0.0770031	0.0301529	0.403125
ENSMUSG00000007021	Syngr3	4864	-1.34083	-1.34201	3.51787	0.0302835	0.404467
ENSMUSG00000085569	Gm12602	28364	-1.33684	-1.33742	4.52723	0.0303931	0.404716
ENSMUSG00000085586	Gm11613	16184	-2.22329	-2.2325	1.65606	0.0313178	0.41455
ENSMUSG00000053219	Raet1e	215571	-1.38521	-1.39013	1.56707	0.0314919	0.416442
ENSMUSG00000078349	AW011738	7294	-1.82581	-1.83617	1.08036	0.0322429	0.42553
ENSMUSG00000028005	Gucy1b1	42684	-1.2665	-1.26762	3.47131	0.0324723	0.427721
ENSMUSG00000033498	Strc	23441	-1.39534	-1.39599	4.44359	0.0325611	0.427908
ENSMUSG00000121107	9330133O14Rik	2851	-1.53765	-1.54206	1.90574	0.0336552	0.440685
ENSMUSG00000071203	Naip5	34585	-1.55969	-1.57691	0.112703	0.0339002	0.443459
ENSMUSG00000030162	Olr1	21922	-2.58359	-2.59833	1.3681	0.0357277	0.464634
ENSMUSG00000047945	Marcksl1	2405	-1.46486	-1.46653	3.18771	0.0358753	0.4661
ENSMUSG00000078853	Igtp	8036	-2.6761	-2.68486	2.19907	0.0359401	0.466488
ENSMUSG00000030854	Ptpn5	55890	-1.56031	-1.56941	0.933786	0.0360223	0.466864
ENSMUSG00000120623	NA	802	-2.11456	-2.12068	2.11455	0.0381842	0.493219
ENSMUSG00000033763	Mtss2	19925	-1.39362	-1.39374	6.86375	0.0384907	0.496218
ENSMUSG00000106674	Gm20005	7285	-1.47341	-1.47873	1.57301	0.0385976	0.497116
ENSMUSG00000040026	Saa3	3703	-1.64447	-1.64866	2.10032	0.0387079	0.498056
ENSMUSG00000028456	Unc13b	205919	-1.83543	-1.85126	0.509907	0.0397269	0.509695
ENSMUSG00000038175	Mylip	22281	-1.30861	-1.30946	3.9354	0.0406536	0.520086
ENSMUSG00000045092	S1pr1	4640	-1.58292	-1.58345	4.97501	0.0407937	0.521379
ENSMUSG00000107879	9330102E08Rik	14100	-1.34834	-1.34921	3.93676	0.0409521	0.522903
ENSMUSG00000041757	Plekha6	139226	-1.51127	-1.51155	5.80405	0.0412388	0.524558
ENSMUSG00000053552	Ebf4	75313	-1.45062	-1.45295	2.68824	0.0412073	0.524558
ENSMUSG00000057606	Colq	68262	-1.29297	-1.29768	1.50227	0.0412087	0.524558
ENSMUSG00000029843	Slc13a4	40175	-1.56203	-1.56388	3.15643	0.0416386	0.527133
ENSMUSG00000018102	H2bc4	8710	-1.60862	-1.60965	4.05738	0.0422148	0.533416
ENSMUSG00000100009	Gm7967	17868	-1.4366	-1.44003	2.13681	0.0421941	0.533416
ENSMUSG00000001506	Col1a1	16819	-1.36056	-1.36059	8.81529	0.0426517	0.537919
ENSMUSG00000038393	Txnip	3927	-1.66173	-1.66175	9.73231	0.0433565	0.545777
ENSMUSG00000052920	Prkg1	1200545	-1.32648	-1.327	4.68512	0.0436006	0.548333
ENSMUSG00000026489	Coq8a	34365	-1.43429	-1.43595	3.15929	0.0442213	0.555016
ENSMUSG00000074480	Mex3a	9002	-1.37836	-1.37872	5.26908	0.0454	0.567224
ENSMUSG00000100215	Gm8292	396	-1.64975	-1.65452	1.92701	0.0461513	0.574379
ENSMUSG00000052957	Gas1	2961	-1.47856	-1.47871	6.64851	0.0463715	0.575592
ENSMUSG00000097000	Gm17435	12598	-1.28567	-1.28866	2.11249	0.046596	0.577842
ENSMUSG00000079484	Phyhd1	15947	-1.47317	-1.48153	0.957577	0.0466824	0.578377
ENSMUSG00000021892	Sh3bp5	76199	-1.38675	-1.38774	3.81096	0.0479444	0.592364
ENSMUSG00000090386	Mir99ahg	537132	-1.40993	-1.41105	3.66984	0.0490452	0.602066
ENSMUSG00000086610	Gm15408	6520	-1.66196	-1.67897	0.272224	0.0499752	0.611236
