# Supplementary material for: Generation of Novel Immunocompetent Mouse Cell Lines to Model Experimental Metastasis of High-Risk Neuroblastoma
Source: Cancers (Basel). 2023 Sep 23;15(19):4693. doi: 10.3390/cancers15194693 (PMC10571844; doi:10.3390/cancers15194693)
Supplement: Supplementary file 1 [file cancers-15-04693-s001.zip › Table S2 enriched GO terms_Dhamdhere.M.xlsx]

## Sheet: enriched GO_DEGs
ID	Description	GeneRatio	BgRatio	pvalue	p.adjust	qvalue	geneID	Count
GO:0030198	extracellular matrix organization	38/627	192/11457	2.89783e-12	4.03377e-09	3.00459e-09	Mmp15/Col24a1/Col4a1/Adamts12/Col7a1/Elf3/Col18a1/Tgfbi/Ccdc80/Matn3/Ccn2/Cav1/Mmp28/Bcl3/Smoc1/Ramp2/Foxc1/Itgb3/Axin2/Lamb1/Slc2a10/Pdgfra/Col15a1/Fbln5/Thsd4/Fap/Adamts2/Col4a4/Cyp1b1/Postn/Mmp3/Fbln1/Adamts15/Adamts8/Agt/Lox/Nid1/Lum	38
GO:0043062	extracellular structure organization	38/627	192/11457	2.89783e-12	4.03377e-09	3.00459e-09	Mmp15/Col24a1/Col4a1/Adamts12/Col7a1/Elf3/Col18a1/Tgfbi/Ccdc80/Matn3/Ccn2/Cav1/Mmp28/Bcl3/Smoc1/Ramp2/Foxc1/Itgb3/Axin2/Lamb1/Slc2a10/Pdgfra/Col15a1/Fbln5/Thsd4/Fap/Adamts2/Col4a4/Cyp1b1/Postn/Mmp3/Fbln1/Adamts15/Adamts8/Agt/Lox/Nid1/Lum	38
GO:0045229	external encapsulating structure organization	38/627	192/11457	2.89783e-12	4.03377e-09	3.00459e-09	Mmp15/Col24a1/Col4a1/Adamts12/Col7a1/Elf3/Col18a1/Tgfbi/Ccdc80/Matn3/Ccn2/Cav1/Mmp28/Bcl3/Smoc1/Ramp2/Foxc1/Itgb3/Axin2/Lamb1/Slc2a10/Pdgfra/Col15a1/Fbln5/Thsd4/Fap/Adamts2/Col4a4/Cyp1b1/Postn/Mmp3/Fbln1/Adamts15/Adamts8/Agt/Lox/Nid1/Lum	38
GO:0007188	adenylate cyclase-modulating G protein-coupled receptor signaling pathway	22/627	78/11457	9.47317e-11	8.73688e-08	6.50773e-08	Adra1b/Adgrf5/Tbxa2r/Cxcl9/Nos1/Rapgef4/Akap12/Ramp2/Itgb3/Gnao1/Adgrl2/Mc1r/Npr3/Rgs2/Adra1d/Adgrl1/Lpar1/Ptgfr/Adgre5/Chrm4/Gpr176/Adm	22
GO:0007169	transmembrane receptor protein tyrosine kinase signaling pathway	57/627	417/11457	1.04608e-10	8.73688e-08	6.50773e-08	Ntrk1/Epha1/Kank1/Bmp5/Musk/Col4a1/Gpld1/Cass4/Adamts12/Vil1/Fgf7/Anks1b/Lck/Csf1r/Ngef/Rgs14/Nr1h4/Samd12/Ccn2/Areg/Bdnf/Csf1/Pdgfa/Dab2ip/Pid1/Efs/Ptprf/Shc2/Foxc1/Itgb3/Ghr/Stat5b/Npr2/Flt1/Thbs1/Stat5a/Pdgfra/Tbx2/Plcb1/Dcn/Nrg1/Tgfa/Igf1/Trim71/Wnt5a/Hhip/Ptp4a3/Sesn3/Kdr/Enpp1/Ror2/Grb14/Agt/Lox/Svep1/Ar/Vegfc	57
GO:0048514	blood vessel morphogenesis	58/627	433/11457	1.59937e-10	1.11316e-07	8.29145e-08	Ntrk1/Epha1/Asb4/Hc/Adgrf5/Ptn/Col4a1/Tbxa2r/Gpld1/Acvrl1/Arhgap24/Col18a1/Gata2/Ccn2/Prrx1/Isl1/Cav1/Ecscr/Ackr3/Pdgfa/Dab2ip/Thbs2/Ramp2/Pecam1/Foxc1/Itgb3/Lrp2/Zfp36l1/Stra6/Npr2/Flt1/Thbs1/Cd34/Pdgfra/Npr3/Tbx2/Fbln5/Dcn/Tgfa/Emilin2/Hes1/Fap/Ace/Cyp1b1/Wnt5a/Hhip/Cfh/Adam12/Slit2/Kdr/Anpep/Enpp1/Rora/Agt/Lox/Adm/Vegfc/Tfap2b	58
GO:0007423	sensory organ development	50/627	351/11457	3.65669e-10	2.18148e-07	1.62489e-07	Hpca/Bmp5/Cryaa/Ptn/Col4a1/Rpgrip1/Slc4a5/Acvrl1/Gata2/Casz1/Prrx1/Chrdl1/Bdnf/Smoc1/Wnt10a/Nfia/Tenm3/Mfap2/Pbx3/Foxc1/Bnc2/Osr2/Stra6/Cacna1c/Flt1/Pdgfra/Tbx2/Rarb/Stau2/Tbx18/Hes1/Igf1/H2-K1/Cyp1b1/Ntn1/Nfib/Fjx1/Wnt5a/H2-T23/Zhx2/Cfh/Aldh1a1/Lin7a/Kdr/Cthrc1/Nectin3/Enpp1/Ror2/Cebpa/Tfap2b	50
GO:0006935	chemotaxis	45/627	316/11457	2.9092e-09	1.34987e-06	1.00546e-06	Ntrk1/Cxcl16/Clxn/Hc/Ptn/Cxcl9/Il23a/Mst1/Fgf7/Spp1/Csf1r/Gpsm3/Pla2g7/Nckap1l/Isl1/Bdnf/Mmp28/Ecscr/Ank3/Csf1/Ackr3/Pdgfa/Itgb3/Lrp2/Cd74/Flt1/Thbs1/Sema4g/Pdgfra/Egr2/Slit3/Nrg1/Gas6/Lpar1/Lama5/Ntn1/Nfib/Sema3f/Crmp1/Wnt5a/Dpep1/Slit2/Kdr/Lox/Vegfc	45
GO:0042330	taxis	45/627	316/11457	2.9092e-09	1.34987e-06	1.00546e-06	Ntrk1/Cxcl16/Clxn/Hc/Ptn/Cxcl9/Il23a/Mst1/Fgf7/Spp1/Csf1r/Gpsm3/Pla2g7/Nckap1l/Isl1/Bdnf/Mmp28/Ecscr/Ank3/Csf1/Ackr3/Pdgfa/Itgb3/Lrp2/Cd74/Flt1/Thbs1/Sema4g/Pdgfra/Egr2/Slit3/Nrg1/Gas6/Lpar1/Lama5/Ntn1/Nfib/Sema3f/Crmp1/Wnt5a/Dpep1/Slit2/Kdr/Lox/Vegfc	45
GO:0007186	G protein-coupled receptor signaling pathway	41/627	274/11457	3.45919e-09	1.44456e-06	1.07599e-06	Acpp/Adra1b/Adgrf5/Qrfp/Tbxa2r/Rgs4/Ano1/Cxcl9/Kctd12b/Nos1/Gngt2/Rgs14/Rapgef4/Areg/Cav1/Akap12/Ackr3/Ramp2/Itgb3/Gnao1/Adgrl2/Bdkrb2/Mc1r/Npr3/Rgs2/Plcb1/Dgkh/Adra1d/Adgrl1/Lpar1/Ptgfr/Rgs16/Rgs7bp/Adgre5/Ecel1/Chrm4/Necab2/Gpr176/Agt/Avpr1a/Adm	41
GO:0050900	leukocyte migration	34/627	203/11457	4.247e-09	1.61232e-06	1.20095e-06	Crtam/Cxcl16/Hc/Nlrp12/Ptn/Cxcl9/Il23a/Mst1/Myo1g/Spp1/Csf1r/Gpsm3/Pla2g7/Add2/Nckap1l/Mmp28/Csf1/Pecam1/Itgb3/Cd74/Stat5b/Flt1/Thbs1/Cd34/Plcb1/Gas6/Podxl2/Wnt5a/Ripk3/Dpep1/Slit2/Enpp1/Ror2/Vegfc	34
GO:0008015	blood circulation	40/627	268/11457	5.81884e-09	2.02495e-06	1.5083e-06	Adra1b/Acta2/Qrfp/Tbxa2r/Rgs4/Nos1/Slc4a5/Acvrl1/Hopx/Ocln/Ccn2/Isl1/Cav1/Akap12/Ramp2/Foxc1/Faah/Gnao1/Cacna1c/Cacna2d1/Npr2/Bdkrb2/Cd34/Npr3/Rgs2/Adra1d/Tbx18/Gas6/Ace/Ptp4a3/Postn/Kcnj2/Slit2/Kdr/Stc1/Agt/Avpr1a/Adm/Ar/Vegfc	40
GO:0003013	circulatory system process	42/627	292/11457	7.38571e-09	2.30612e-06	1.71773e-06	Cd36/Adra1b/Acta2/Qrfp/Tbxa2r/Rgs4/Nos1/Slc4a5/Acvrl1/Hopx/Ocln/Ccn2/Isl1/Cav1/Akap12/Ramp2/Foxc1/Faah/Gnao1/Cacna1c/Cacna2d1/Npr2/Bdkrb2/Cd34/Npr3/Rgs2/Adra1d/Tbx18/Gas6/Ace/Ptp4a3/Postn/Kcnj2/Slit2/Kdr/Stc1/Agt/Avpr1a/Svep1/Adm/Ar/Vegfc	42
GO:0050731	positive regulation of peptidyl-tyrosine phosphorylation	25/627	122/11457	7.73126e-09	2.30612e-06	1.71773e-06	Cd36/Hcls1/Musk/Il23a/Cass4/Abi3/Fgf7/Lck/Bank1/Csf1r/Isl1/Areg/Pecam1/Itgb3/Plpp3/Cd74/Ghr/Pdgfra/Nrg1/Tgfa/Hes1/Igf1/Gas6/Ace/Agt	25
GO:0008217	regulation of blood pressure	22/627	98/11457	1.05498e-08	2.93706e-06	2.18769e-06	Adra1b/Acta2/Qrfp/Tbxa2r/Nos1/Slc4a5/Acvrl1/Ramp2/Cacna1c/Bdkrb2/Cd34/Npr3/Adra1d/Gas6/Ace/Postn/Kdr/Agt/Avpr1a/Adm/Ar/Vegfc	22
GO:0042445	hormone metabolic process	23/627	107/11457	1.18323e-08	3.08823e-06	2.30029e-06	Bmp5/Afp/Ctsk/Pde8b/Iyd/Spp1/Cacna1a/Ghr/Stat5b/Pdgfra/Dio2/Hsd11b1/Akr1c14/Igf1/Ace/Cyp1b1/Aldh1a1/Stc2/Enpp1/Mme/Agt/Adm/Crabp1	23
GO:0098609	cell-cell adhesion	55/627	450/11457	1.39554e-08	3.42811e-06	2.55345e-06	Crtam/Rasal3/Bmp5/Clstn3/Tnfsf13b/Il23a/Lck/Tcam1/Add2/Ptpn6/Il2rg/Nckap1l/Cav1/Zdhhc2/Adam19/Ank3/Hlx/Tenm3/Ptprf/Pecam1/Itgb3/Plpp3/Zfp608/Pcdh18/Zfp36l1/Lamb1/C1qtnf1/Cd74/Stat5b/Thbs1/Cd34/Stat5a/Pdgfra/Pcdhb14/Igsf11/Nrg1/Tbx18/Emilin2/Hes1/Adgrl1/Fstl3/Igf1/Podxl2/Cyp1b1/Lama5/Ntn1/Sox12/Lrfn3/Wnt5a/Cfh/Pcdh19/Cdh26/Slit2/Nectin3/Svep1	55
GO:0009611	response to wounding	45/627	333/11457	1.51764e-08	3.52094e-06	2.6226e-06	Cd36/Kank1/Tspan8/Acta2/Hc/Ptn/Tbxa2r/Scarf1/Acvrl1/Vil1/Fgf7/Arhgap24/Gata2/Itgb4/Ptpn6/Procr/Cav1/Pdgfa/Nfia/Ptprf/Pecam1/Itgb3/Plpp3/Dpysl3/Zfp36l1/C1qtnf1/Npr2/Thbs1/Cd34/Pdgfra/Nrep/Nrg1/Emilin2/Cdkn1a/Igf1/Gas6/F13a1/Nfib/Wnt5a/Cfh/Fbln1/Kdr/Enpp1/Lox/Adm	45
GO:0007204	positive regulation of cytosolic calcium ion concentration	19/627	77/11457	2.06744e-08	4.51382e-06	3.36215e-06	Cd36/Adra1b/P2rx7/Tbxa2r/Gata2/Cav1/Cacna1a/C1qtnf1/Cacna1c/Cacna2d1/Bdkrb2/Pdgfra/Adra1d/Lpar1/Ptgfr/Kdr/Agt/Avpr1a/Adm	19
GO:0001525	angiogenesis	47/627	360/11457	2.16179e-08	4.51382e-06	3.36215e-06	Ntrk1/Epha1/Hc/Ptn/Col4a1/Tbxa2r/Gpld1/Acvrl1/Arhgap24/Col18a1/Gata2/Ccn2/Isl1/Cav1/Ecscr/Ackr3/Pdgfa/Dab2ip/Thbs2/Ramp2/Pecam1/Foxc1/Itgb3/Npr2/Flt1/Thbs1/Cd34/Pdgfra/Npr3/Fbln5/Dcn/Tgfa/Emilin2/Fap/Ace/Cyp1b1/Wnt5a/Hhip/Cfh/Adam12/Slit2/Kdr/Anpep/Rora/Agt/Adm/Vegfc	47
GO:0018108	peptidyl-tyrosine phosphorylation	33/627	210/11457	3.62096e-08	7.20054e-06	5.36338e-06	Ntrk1/Cd36/Epha1/Hcls1/Musk/Il23a/Cass4/Abi3/Fgf7/Lck/Bank1/Csf1r/Ptpn6/Isl1/Areg/Cav1/Pdgfa/Pecam1/Itgb3/Plpp3/Cd74/Ghr/Flt1/Stat5a/Pdgfra/Nrg1/Tgfa/Hes1/Igf1/Gas6/Ace/Kdr/Agt	33
GO:0018212	peptidyl-tyrosine modification	33/627	212/11457	4.58152e-08	8.46588e-06	6.30588e-06	Ntrk1/Cd36/Epha1/Hcls1/Musk/Il23a/Cass4/Abi3/Fgf7/Lck/Bank1/Csf1r/Ptpn6/Isl1/Areg/Cav1/Pdgfa/Pecam1/Itgb3/Plpp3/Cd74/Ghr/Flt1/Stat5a/Pdgfra/Nrg1/Tgfa/Hes1/Igf1/Gas6/Ace/Kdr/Agt	33
GO:0001910	regulation of leukocyte mediated cytotoxicity	14/627	44/11457	4.66272e-08	8.46588e-06	6.30588e-06	Crtam/P2rx7/Ulbp1/Il23a/Nckap1l/Tap2/Serpinb9b/Stat5b/Stat5a/H2-Q4/H2-K1/Tap1/H2-T23/Ripk3	14
GO:0040017	positive regulation of locomotion	51/627	420/11457	5.96137e-08	1.03728e-05	7.72624e-06	Epha1/Cxcl16/Acta2/Ptn/Il23a/Gpld1/Cass4/Vil1/Fgf7/Trf/Col18a1/Csf1r/Gpsm3/Gata2/Pla2g7/Rapgef4/Nckap1l/Cav1/Akap12/Csf1/Ackr3/Pdgfa/Dab2ip/Pecam1/Itgb3/Plpp3/Lamb1/Cd74/Stat5b/Flt1/Thbs1/Sema4g/Stat5a/Pdgfra/Daam2/Cpeb1/Igf1/Gas6/Lpar1/Cyp1b1/Ntn1/Sema3f/Wnt5a/Postn/Mmp3/Fbln1/Slit2/Kdr/Ror2/Agt/Vegfc	51
GO:2000147	positive regulation of cell motility	50/627	413/11457	8.89285e-08	1.43181e-05	1.06649e-05	Epha1/Cxcl16/Acta2/Ptn/Il23a/Gpld1/Cass4/Vil1/Fgf7/Trf/Col18a1/Csf1r/Gpsm3/Gata2/Pla2g7/Rapgef4/Nckap1l/Cav1/Akap12/Csf1/Ackr3/Pdgfa/Dab2ip/Pecam1/Itgb3/Plpp3/Lamb1/Cd74/Stat5b/Flt1/Thbs1/Sema4g/Stat5a/Pdgfra/Daam2/Cpeb1/Igf1/Gas6/Lpar1/Cyp1b1/Ntn1/Sema3f/Wnt5a/Postn/Mmp3/Fbln1/Kdr/Ror2/Agt/Vegfc	50
GO:0001501	skeletal system development	45/627	353/11457	8.91451e-08	1.43181e-05	1.06649e-05	Bmp5/P2rx7/Ctsk/Gpld1/Adamts12/Lrrc17/Col18a1/Ptpn6/Matn3/Ccn2/Arid5a/Prrx1/Actn3/Pdgfa/Nfia/Foxc1/Axin2/Bnc2/Osr2/Npr2/Slc2a10/Thbs1/Timp3/Wnt9a/Pdgfra/Npr3/Alx3/Rarb/Fbln5/Igf1/Ogn/Nfib/Wnt5a/Hhip/Cfh/Kdr/Mboat2/Enpp1/Stc1/Ror2/Notum/Alx4/Lox/Sp5/Fbn2	45
GO:0090596	sensory organ morphogenesis	27/627	158/11457	1.10944e-07	1.71593e-05	1.27813e-05	Cryaa/Ptn/Rpgrip1/Gata2/Casz1/Prrx1/Bdnf/Tenm3/Mfap2/Osr2/Stra6/Flt1/Tbx2/Rarb/Stau2/Tbx18/Ntn1/Fjx1/Wnt5a/Zhx2/Cfh/Aldh1a1/Kdr/Cthrc1/Nectin3/Enpp1/Ror2	27
GO:0031341	regulation of cell killing	15/627	54/11457	1.18009e-07	1.76002e-05	1.31096e-05	Crtam/P2rx7/Ulbp1/Il23a/Nckap1l/Tap2/Serpinb9b/Stat5b/Stat5a/H2-Q4/H2-K1/Tap1/H2-T23/Ripk3/Cfh	15
GO:0030001	metal ion transport	51/627	434/11457	1.70741e-07	2.45341e-05	1.82744e-05	Hpca/P2rx7/Rgs4/Cxcl9/Nos1/Atp2c2/Kcnn4/Slc4a5/Slc5a4a/Lck/Trf/Pkd1l1/Ptpn6/Ccn2/Slc9a9/Cabp1/Cacng8/Cav1/Ank3/Rrad/Fxyd5/Ramp2/Cacna1a/Klhl24/Itgb3/Slc40a1/Lrp2/Kcnt2/Gnao1/Kcnn1/Tesc/Cp/Cacna1c/Cacna2d1/Cachd1/Kcnip3/Gem/Stac2/Plcb1/Hes1/Cnksr3/Igf1/Gas6/Ace/Nalcn/Slc6a15/Scn8a/Kcnj2/Stc2/Stc1/Agt	51
GO:0001909	leukocyte mediated cytotoxicity	16/627	63/11457	1.76251e-07	2.45341e-05	1.82744e-05	Crtam/P2rx7/Ulbp1/Il23a/Unc13d/Ptpn6/Nckap1l/Tap2/Serpinb9b/Stat5b/Stat5a/H2-Q4/H2-K1/Tap1/H2-T23/Ripk3	16
GO:0001503	ossification	37/627	270/11457	2.08937e-07	2.81458e-05	2.09646e-05	Bmp5/P2rx7/Ptn/Gpld1/Adamts12/Ifitm1/Lrrc17/Igsf10/Spp1/Csf1r/Ccn2/Tph1/Actn3/Areg/Chrdl1/Smoc1/Csf1/Mtss1/Foxc1/Axin2/Osr2/Npr2/Egr2/Fstl3/Igf1/Wnt5a/Aspn/Omd/Cthrc1/Enpp1/Stc1/Notum/Cebpa/Lox/Vegfc/Fbn2/Gdf10	37
GO:0006816	calcium ion transport	33/627	227/11457	2.40725e-07	3.02436e-05	2.25272e-05	Hpca/P2rx7/Rgs4/Cxcl9/Nos1/Atp2c2/Kcnn4/Lck/Pkd1l1/Ptpn6/Ccn2/Cabp1/Cacng8/Cav1/Rrad/Ramp2/Cacna1a/Itgb3/Gnao1/Cacna1c/Cacna2d1/Cachd1/Gem/Stac2/Plcb1/Hes1/Igf1/Gas6/Ace/Nalcn/Stc2/Stc1/Agt	33
GO:0071363	cellular response to growth factor stimulus	51/627	439/11457	2.44962e-07	3.02436e-05	2.25272e-05	Ntrk1/Amhr2/Nos1/Adamts12/Acvrl1/Vil1/Lpxn/Fgf7/Ccn2/Cav1/Chrdl1/Bdnf/Ltbp1/Dab2ip/Nfia/Ramp2/Ptprf/Foxc1/Itgb3/Lrp2/Zfp36l1/Stat5b/Flt1/Slc2a10/Rasl11b/Thbs1/Pdgfra/Tbx2/Fos/Htra1/Nrep/Dcn/Hes1/Fstl3/Gas6/Trim71/Wnt5a/Hhip/Ptp4a3/Eid2/Aspn/Slit2/Kdr/Enpp1/Ror2/Agt/Lox/Vegfc/Fbn2/Tfap2b/Gdf10	51
GO:0008285	negative regulation of cell population proliferation	54/627	477/11457	2.49476e-07	3.02436e-05	2.25272e-05	Crtam/Ntrk1/Bmp5/Tesl1/Ptn/Gpld1/Nos1/Ifitm1/Acvrl1/Hspa1a/Csf1r/Gata2/Irf6/Ptpn6/Sult2b1/Isl1/Cav1/Bdnf/Ackr3/Dab2ip/Ptprf/Mtss1/Axin2/Btg2/Trp53inp1/Ptges/Tesc/Bdkrb2/Flt1/Thbs1/Timp3/Wnt9a/Npr3/Ccn5/Slit3/Cpeb1/Rarb/Cdkn1a/Hes1/Fap/Igf1/Optn/Cyp1b1/Ogn/Nfib/Wnt5a/Fbln1/Slit2/Rerg/Cebpa/Agt/Adm/Ar/Tfap2b	54
GO:0070848	response to growth factor	52/627	452/11457	2.53478e-07	3.02436e-05	2.25272e-05	Ntrk1/Amhr2/Nos1/Adamts12/Acvrl1/Vil1/Lpxn/Fgf7/Ccn2/Cav1/Chrdl1/Bdnf/Ltbp1/Dab2ip/Nfia/Ramp2/Ptprf/Foxc1/Itgb3/Lrp2/Zfp36l1/Stat5b/Npr2/Flt1/Slc2a10/Rasl11b/Thbs1/Pdgfra/Tbx2/Fos/Htra1/Nrep/Dcn/Hes1/Fstl3/Gas6/Trim71/Wnt5a/Hhip/Ptp4a3/Eid2/Aspn/Slit2/Kdr/Enpp1/Ror2/Agt/Lox/Vegfc/Fbn2/Tfap2b/Gdf10	52
GO:0030335	positive regulation of cell migration	48/627	404/11457	2.87378e-07	3.33359e-05	2.48305e-05	Epha1/Cxcl16/Acta2/Ptn/Il23a/Gpld1/Cass4/Vil1/Fgf7/Col18a1/Csf1r/Gpsm3/Gata2/Pla2g7/Rapgef4/Nckap1l/Cav1/Akap12/Csf1/Ackr3/Pdgfa/Dab2ip/Pecam1/Itgb3/Plpp3/Lamb1/Cd74/Stat5b/Flt1/Thbs1/Sema4g/Stat5a/Pdgfra/Daam2/Cpeb1/Igf1/Gas6/Lpar1/Cyp1b1/Sema3f/Wnt5a/Postn/Mmp3/Fbln1/Kdr/Ror2/Agt/Vegfc	48
GO:0099536	synaptic signaling	51/627	442/11457	3.031e-07	3.42093e-05	2.54811e-05	Ntrk1/Musk/Pclo/Snap25/Cntnap4/P2rx7/Clstn3/Ptn/Rgs4/Prrt1/Syt1/Nos1/Dlg2/Anks1b/Rgs14/Rapgef4/Cabp1/Cacng8/Zdhhc2/Chrdl1/Bdnf/Akap12/Dtna/Cacna1a/Sv2a/Cacna1c/Npr2/Grik2/Sybu/Cpeb1/Pdlim4/Igsf11/Plcb1/Stau2/Nsg1/Nrg1/Peg13/Synpo/Igf1/Ace/Gria3/Wnt5a/Nalcn/Lin7a/Chrm4/Sncaip/Kdr/Enpp1/Ror2/Mme/Agt	51
GO:0050730	regulation of peptidyl-tyrosine phosphorylation	28/627	177/11457	3.43128e-07	3.7708e-05	2.80871e-05	Cd36/Hcls1/Musk/Il23a/Cass4/Abi3/Fgf7/Lck/Bank1/Csf1r/Ptpn6/Isl1/Areg/Cav1/Pdgfa/Pecam1/Itgb3/Plpp3/Cd74/Ghr/Pdgfra/Nrg1/Tgfa/Hes1/Igf1/Gas6/Ace/Agt	28
GO:0060326	cell chemotaxis	26/627	157/11457	3.61195e-07	3.86757e-05	2.88079e-05	Cxcl16/Clxn/Hc/Ptn/Cxcl9/Il23a/Mst1/Spp1/Csf1r/Gpsm3/Pla2g7/Nckap1l/Mmp28/Csf1/Cd74/Flt1/Thbs1/Pdgfra/Gas6/Lpar1/Wnt5a/Dpep1/Slit2/Kdr/Lox/Vegfc	26
GO:0072001	renal system development	31/627	210/11457	3.96095e-07	4.12726e-05	3.07422e-05	Hc/Col4a1/Spp1/Bdnf/Pdgfa/Nfia/Mtss1/Foxc1/Itgb3/Lrp2/Osr2/Irx1/Stra6/Npr2/Pdgfra/Basp1/Rarb/Tbx18/Hes1/Col4a4/Bicc1/Ace/Lama5/Pygo1/Wnt5a/Cfh/Slit2/Enpp1/Agt/Nid1/Tfap2b	31
GO:0007268	chemical synaptic transmission	48/627	409/11457	4.15098e-07	4.12726e-05	3.07422e-05	Ntrk1/Musk/Pclo/Snap25/Cntnap4/P2rx7/Clstn3/Ptn/Rgs4/Prrt1/Syt1/Nos1/Dlg2/Anks1b/Rgs14/Rapgef4/Cacng8/Zdhhc2/Chrdl1/Bdnf/Akap12/Cacna1a/Sv2a/Cacna1c/Npr2/Grik2/Sybu/Cpeb1/Pdlim4/Igsf11/Plcb1/Stau2/Nsg1/Peg13/Synpo/Igf1/Ace/Gria3/Wnt5a/Nalcn/Lin7a/Chrm4/Sncaip/Kdr/Enpp1/Ror2/Mme/Agt	48
GO:0098916	anterograde trans-synaptic signaling	48/627	409/11457	4.15098e-07	4.12726e-05	3.07422e-05	Ntrk1/Musk/Pclo/Snap25/Cntnap4/P2rx7/Clstn3/Ptn/Rgs4/Prrt1/Syt1/Nos1/Dlg2/Anks1b/Rgs14/Rapgef4/Cacng8/Zdhhc2/Chrdl1/Bdnf/Akap12/Cacna1a/Sv2a/Cacna1c/Npr2/Grik2/Sybu/Cpeb1/Pdlim4/Igsf11/Plcb1/Stau2/Nsg1/Peg13/Synpo/Igf1/Ace/Gria3/Wnt5a/Nalcn/Lin7a/Chrm4/Sncaip/Kdr/Enpp1/Ror2/Mme/Agt	48
GO:0003018	vascular process in circulatory system	23/627	130/11457	5.12249e-07	4.97477e-05	3.7055e-05	Cd36/Adra1b/Acta2/Tbxa2r/Nos1/Ocln/Cav1/Akap12/Ramp2/Foxc1/Faah/Cacna1c/Bdkrb2/Npr3/Rgs2/Adra1d/Ace/Ptp4a3/Slit2/Kdr/Agt/Avpr1a/Adm	23
GO:0099537	trans-synaptic signaling	48/627	414/11457	5.94716e-07	5.55047e-05	4.13431e-05	Ntrk1/Musk/Pclo/Snap25/Cntnap4/P2rx7/Clstn3/Ptn/Rgs4/Prrt1/Syt1/Nos1/Dlg2/Anks1b/Rgs14/Rapgef4/Cacng8/Zdhhc2/Chrdl1/Bdnf/Akap12/Cacna1a/Sv2a/Cacna1c/Npr2/Grik2/Sybu/Cpeb1/Pdlim4/Igsf11/Plcb1/Stau2/Nsg1/Peg13/Synpo/Igf1/Ace/Gria3/Wnt5a/Nalcn/Lin7a/Chrm4/Sncaip/Kdr/Enpp1/Ror2/Mme/Agt	48
GO:0002449	lymphocyte mediated immunity	26/627	161/11457	5.98111e-07	5.55047e-05	4.13431e-05	Crtam/Mbl2/Hc/P2rx7/Ulbp1/Batf/Il23a/Unc13d/Myo1g/Ptpn6/Nckap1l/Arid5a/Bcl3/Tap2/Serpinb9b/Cd74/Stat5b/Stat5a/H2-Q4/H2-K1/Tap1/H2-T23/Ripk3/Cfh/Enpp1/Svep1	26
GO:0007189	adenylate cyclase-activating G protein-coupled receptor signaling pathway	14/627	53/11457	6.16329e-07	5.5952e-05	4.16763e-05	Adra1b/Adgrf5/Tbxa2r/Cxcl9/Nos1/Rapgef4/Ramp2/Adgrl2/Mc1r/Adra1d/Adgrl1/Ptgfr/Adgre5/Adm	14
GO:0002688	regulation of leukocyte chemotaxis	16/627	69/11457	6.76783e-07	6.01329e-05	4.47905e-05	Hc/Ptn/Il23a/Mst1/Csf1r/Gpsm3/Pla2g7/Nckap1l/Mmp28/Csf1/Cd74/Thbs1/Gas6/Wnt5a/Slit2/Vegfc	16
GO:0030595	leukocyte chemotaxis	21/627	114/11457	8.03237e-07	6.98816e-05	5.20519e-05	Cxcl16/Hc/Ptn/Cxcl9/Il23a/Mst1/Spp1/Csf1r/Gpsm3/Pla2g7/Nckap1l/Mmp28/Csf1/Cd74/Flt1/Thbs1/Gas6/Wnt5a/Dpep1/Slit2/Vegfc	21
GO:0010817	regulation of hormone levels	39/627	310/11457	9.22948e-07	7.86578e-05	5.85888e-05	Bmp5/Pclo/Snap25/Afp/Ctsk/Ano1/Gpld1/Nos1/Pde8b/Iyd/Spp1/Nr1h4/Rapgef4/Isl1/Cacna1a/Lrp2/C1qtnf1/Ghr/Gnao1/Stat5b/Cacna1c/Pdgfra/Dio2/Hsd11b1/Sybu/Akr1c14/Plcb1/Nrg1/Igf1/Ace/Cyp1b1/Aldh1a1/Stc2/Enpp1/Mme/Agt/Adm/Tfap2b/Crabp1	39
GO:0001906	cell killing	18/627	88/11457	1.00295e-06	8.36884e-05	6.2336e-05	Crtam/P2rx7/Ulbp1/Cxcl9/Il23a/Unc13d/Ptpn6/Nckap1l/Tap2/Serpinb9b/Stat5b/Stat5a/H2-Q4/H2-K1/Tap1/H2-T23/Ripk3/Cfh	18
GO:0051216	cartilage development	23/627	135/11457	1.02206e-06	8.36884e-05	6.2336e-05	Bmp5/Ctsk/Gpld1/Adamts12/Matn3/Ccn2/Arid5a/Prrx1/Nfia/Axin2/Osr2/Npr2/Thbs1/Wnt9a/Rarb/Ogn/Nfib/Wnt5a/Cfh/Mboat2/Enpp1/Stc1/Ror2	23
GO:0042060	wound healing	33/627	243/11457	1.1744e-06	9.43134e-05	7.02501e-05	Cd36/Kank1/Tspan8/Acta2/Tbxa2r/Acvrl1/Vil1/Fgf7/Arhgap24/Gata2/Ptpn6/Procr/Cav1/Pdgfa/Pecam1/Itgb3/Plpp3/C1qtnf1/Npr2/Thbs1/Cd34/Pdgfra/Nrg1/Emilin2/Cdkn1a/Igf1/Gas6/F13a1/Wnt5a/Cfh/Fbln1/Kdr/Lox	33
GO:0050804	modulation of chemical synaptic transmission	39/627	315/11457	1.38425e-06	0.000109069	8.12407e-05	Ntrk1/Musk/Pclo/Snap25/Cntnap4/P2rx7/Clstn3/Ptn/Rgs4/Prrt1/Syt1/Nos1/Rgs14/Rapgef4/Cacng8/Zdhhc2/Chrdl1/Bdnf/Akap12/Cacna1a/Grik2/Sybu/Cpeb1/Igsf11/Plcb1/Stau2/Nsg1/Synpo/Igf1/Ace/Gria3/Wnt5a/Nalcn/Sncaip/Kdr/Enpp1/Ror2/Mme/Agt	39
GO:0019221	cytokine-mediated signaling pathway	32/627	234/11457	1.46177e-06	0.000111791	8.32685e-05	Tnfsf13b/Sigirr/Cxcl9/Ifitm1/Hspa1a/Csf1r/Casp1/Ptpn6/Nr1h4/Il2rg/Lifr/Il13ra1/Cav1/Osmr/Csf1/Ackr3/Crebrf/Ptprf/Foxc1/Cd74/Ghr/Stat5b/Stat5a/Slit3/Plcb1/Entrep1/Gas6/Wnt5a/Slit2/Il3ra/Ccdc3/Cebpa	32
GO:0045765	regulation of angiogenesis	28/627	190/11457	1.49578e-06	0.000111791	8.32685e-05	Ntrk1/Epha1/Hc/Ptn/Tbxa2r/Acvrl1/Gata2/Isl1/Ecscr/Dab2ip/Thbs2/Ramp2/Foxc1/Itgb3/Flt1/Thbs1/Cd34/Fbln5/Dcn/Emilin2/Cyp1b1/Wnt5a/Hhip/Adam12/Kdr/Agt/Adm/Vegfc	28
GO:0099177	regulation of trans-synaptic signaling	39/627	316/11457	1.49911e-06	0.000111791	8.32685e-05	Ntrk1/Musk/Pclo/Snap25/Cntnap4/P2rx7/Clstn3/Ptn/Rgs4/Prrt1/Syt1/Nos1/Rgs14/Rapgef4/Cacng8/Zdhhc2/Chrdl1/Bdnf/Akap12/Cacna1a/Grik2/Sybu/Cpeb1/Igsf11/Plcb1/Stau2/Nsg1/Synpo/Igf1/Ace/Gria3/Wnt5a/Nalcn/Sncaip/Kdr/Enpp1/Ror2/Mme/Agt	39
GO:0006812	monoatomic cation transport	53/627	494/11457	1.72431e-06	0.000126328	9.40967e-05	Hpca/P2rx7/Rgs4/Ano1/Cxcl9/Nos1/Atp2c2/Kcnn4/Slc4a5/Hvcn1/Slc5a4a/Lck/Trf/Pkd1l1/Ptpn6/Ccn2/Slc9a9/Cabp1/Cacng8/Cav1/Ank3/Rrad/Fxyd5/Ramp2/Cacna1a/Klhl24/Itgb3/Slc40a1/Lrp2/Kcnt2/Gnao1/Kcnn1/Tesc/Cp/Cacna1c/Cacna2d1/Cachd1/Kcnip3/Gem/Stac2/Plcb1/Hes1/Cnksr3/Igf1/Gas6/Ace/Nalcn/Slc6a15/Scn8a/Kcnj2/Stc2/Stc1/Agt	53
GO:1901342	regulation of vasculature development	28/627	192/11457	1.84968e-06	0.000131718	9.8111e-05	Ntrk1/Epha1/Hc/Ptn/Tbxa2r/Acvrl1/Gata2/Isl1/Ecscr/Dab2ip/Thbs2/Ramp2/Foxc1/Itgb3/Flt1/Thbs1/Cd34/Fbln5/Dcn/Emilin2/Cyp1b1/Wnt5a/Hhip/Adam12/Kdr/Agt/Adm/Vegfc	28
GO:0048880	sensory system development	33/627	248/11457	1.86095e-06	0.000131718	9.8111e-05	Cryaa/Ptn/Col4a1/Rpgrip1/Slc4a5/Acvrl1/Casz1/Isl1/Chrdl1/Bdnf/Smoc1/Nfia/Tenm3/Mfap2/Pbx3/Foxc1/Osr2/Stra6/Cacna1c/Flt1/Pdgfra/Tbx2/Rarb/Stau2/Hes1/Cyp1b1/Nfib/Fjx1/Zhx2/Cfh/Aldh1a1/Kdr/Nectin3	33
GO:0001912	positive regulation of leukocyte mediated cytotoxicity	10/627	30/11457	2.48482e-06	0.000170877	0.000127279	Crtam/P2rx7/Ulbp1/Il23a/Tap2/Stat5b/Stat5a/H2-Q4/H2-K1/H2-T23	10
GO:0045596	negative regulation of cell differentiation	49/627	448/11457	2.49605e-06	0.000170877	0.000127279	Ccnd2/Nkx6-3/Ptn/Rgs4/Adamts12/Lrrc17/Acvrl1/Hopx/Csf1r/Gata2/Casz1/Isl1/Areg/Cav1/Bdnf/Hlx/Plpp7/Dab2ip/Itgb3/Axin2/Btg2/Trp53inp1/Zfp608/Zfp36l1/Cd74/Stat5b/Npr2/Sema4g/Stat5a/Wnt9a/Daam2/Rgs2/Rarb/Hes1/Fstl3/Igf1/Ntn1/Sema3f/Wnt5a/Zhx2/Hmgb3/Slit2/Mark1/Enpp1/Rora/Grb14/Cebpa/Vegfc/Gdf10	49
GO:0010959	regulation of metal ion transport	32/627	240/11457	2.55038e-06	0.000171781	0.000127952	Hpca/P2rx7/Rgs4/Cxcl9/Nos1/Atp2c2/Trf/Ptpn6/Cabp1/Cav1/Ank3/Rrad/Fxyd5/Cacna1a/Klhl24/Itgb3/Gnao1/Tesc/Cacna1c/Cacna2d1/Kcnip3/Gem/Stac2/Plcb1/Hes1/Cnksr3/Igf1/Ace/Kcnj2/Stc2/Stc1/Agt	32
GO:0061448	connective tissue development	28/627	196/11457	2.79894e-06	0.000185529	0.000138193	Bmp5/Ctsk/Gpld1/Adamts12/Nr1h4/Matn3/Ccn2/Arid5a/Prrx1/Csf1/Nfia/Itgb3/Axin2/Osr2/Npr2/Thbs1/Wnt9a/Rarb/Igf1/Ogn/Nfib/Wnt5a/Cfh/Mboat2/Enpp1/Stc1/Ror2/Lox	28
GO:0050878	regulation of body fluid levels	26/627	175/11457	3.02878e-06	0.000197628	0.000147204	Cd36/Tspan8/Tbxa2r/Ano1/Kcnn4/Slc4a5/Ptpn6/Tph1/Procr/Cav1/Pdgfa/Itgb3/C1qtnf1/Stat5b/Thbs1/Cd34/Stat5a/Pdgfra/Npr3/Emilin2/Gas6/F13a1/Cfh/Fbln1/Enpp1/Adm	26
GO:0008016	regulation of heart contraction	18/627	95/11457	3.21646e-06	0.000206645	0.000153921	Adra1b/Rgs4/Nos1/Hopx/Ccn2/Isl1/Cav1/Gnao1/Cacna1c/Cacna2d1/Rgs2/Adra1d/Tbx18/Kcnj2/Stc1/Agt/Avpr1a/Adm	18
GO:0050808	synapse organization	40/627	340/11457	3.68646e-06	0.000230944	0.00017202	Ntrk1/Cttnbp2/Musk/Pclo/Dock10/Cntnap4/Clstn3/Ptn/Col4a1/Prrt1/Filip1/Ngef/Add2/Rapgef4/Cabp1/Zdhhc2/Chrdl1/Bdnf/Ank3/Dab2ip/Thbs2/Dnm3/Nfia/Cacna1a/Ptprf/Itgb3/Adgrl2/Sybu/Stau2/Nrg1/Adgrl1/Synpo/Lama5/Ntn1/Sema3f/Lrfn3/Wnt5a/Adgre5/Pdzrn3/Ror2	40
GO:0002443	leukocyte mediated immunity	29/627	210/11457	3.72429e-06	0.000230944	0.00017202	Crtam/Mbl2/Hc/P2rx7/Ulbp1/Milr1/Batf/Il23a/Unc13d/Myo1g/Gata2/Ptpn6/Nckap1l/Arid5a/Bcl3/Tap2/Serpinb9b/Cd74/Stat5b/Stat5a/H2-Q4/H2-K1/Ace/Tap1/H2-T23/Ripk3/Cfh/Enpp1/Svep1	29
GO:0048592	eye morphogenesis	18/627	96/11457	3.76058e-06	0.000230944	0.00017202	Cryaa/Ptn/Rpgrip1/Casz1/Bdnf/Tenm3/Mfap2/Stra6/Flt1/Tbx2/Rarb/Stau2/Fjx1/Zhx2/Cfh/Aldh1a1/Kdr/Nectin3	18
GO:0045785	positive regulation of cell adhesion	38/627	318/11457	4.46372e-06	0.000270152	0.000201225	Cd36/Epha1/Rasal3/Ptn/Tnfsf13b/Il23a/Cass4/Unc13d/Lck/Spp1/Ptpn6/Ccdc80/Il2rg/Nckap1l/Cav1/Adam19/Ank3/Smoc1/Hlx/Csf1/Itgb3/Plpp3/Lamb1/Cd74/Stat5b/Thbs1/Stat5a/Nrg1/Tbx18/Emilin2/Hes1/Fstl3/Igf1/Sox12/Wnt5a/Fbln1/Kdr/Nid1	38
GO:0070371	ERK1 and ERK2 cascade	28/627	201/11457	4.60945e-06	0.000274986	0.000204826	Cd36/Acta2/Nlrp12/Trf/Csf1r/Rgs14/Ptpn6/Ccn2/Cav1/Akap12/Cavin3/Ackr3/Pdgfa/Dab2ip/Itgb3/Zfp36l1/Cd74/Timp3/Pdgfra/Nrg1/Cnksr3/Igf1/Gas6/Rps6ka6/Fbln1/Necab2/Kdr/Agt	28
GO:0001654	eye development	32/627	247/11457	4.74312e-06	0.000275101	0.000204911	Cryaa/Ptn/Col4a1/Rpgrip1/Slc4a5/Acvrl1/Casz1/Chrdl1/Bdnf/Smoc1/Nfia/Tenm3/Mfap2/Pbx3/Foxc1/Osr2/Stra6/Cacna1c/Flt1/Pdgfra/Tbx2/Rarb/Stau2/Hes1/Cyp1b1/Nfib/Fjx1/Zhx2/Cfh/Aldh1a1/Kdr/Nectin3	32
GO:0150063	visual system development	32/627	247/11457	4.74312e-06	0.000275101	0.000204911	Cryaa/Ptn/Col4a1/Rpgrip1/Slc4a5/Acvrl1/Casz1/Chrdl1/Bdnf/Smoc1/Nfia/Tenm3/Mfap2/Pbx3/Foxc1/Osr2/Stra6/Cacna1c/Flt1/Pdgfra/Tbx2/Rarb/Stau2/Hes1/Cyp1b1/Nfib/Fjx1/Zhx2/Cfh/Aldh1a1/Kdr/Nectin3	32
GO:0042310	vasoconstriction	13/627	54/11457	4.82756e-06	0.000276163	0.000205702	Adra1b/Acta2/Tbxa2r/Nos1/Cav1/Faah/Cacna1c/Bdkrb2/Adra1d/Ace/Agt/Avpr1a/Adm	13
GO:1900046	regulation of hemostasis	11/627	39/11457	4.96169e-06	0.00028	0.00020856	Cd36/Tspan8/Tbxa2r/Tph1/Cav1/Pdgfa/C1qtnf1/Thbs1/Cd34/Pdgfra/Emilin2	11
GO:0097529	myeloid leukocyte migration	21/627	128/11457	5.57707e-06	0.000306445	0.000228258	Hc/Cxcl9/Il23a/Mst1/Spp1/Csf1r/Pla2g7/Nckap1l/Mmp28/Csf1/Pecam1/Cd74/Stat5b/Flt1/Thbs1/Plcb1/Dpep1/Slit2/Enpp1/Ror2/Vegfc	21
GO:1903522	regulation of blood circulation	21/627	128/11457	5.57707e-06	0.000306445	0.000228258	Adra1b/Tbxa2r/Rgs4/Nos1/Hopx/Ccn2/Isl1/Cav1/Faah/Gnao1/Cacna1c/Cacna2d1/Rgs2/Adra1d/Tbx18/Ace/Kcnj2/Stc1/Agt/Avpr1a/Adm	21
GO:0043269	regulation of monoatomic ion transport	36/627	297/11457	5.76442e-06	0.000312626	0.000232862	Hpca/P2rx7/Rgs4/Cxcl9/Nos1/Atp2c2/Hvcn1/Trf/Ptpn6/Cabp1/Cacng8/Cav1/Ank3/Rrad/Fxyd5/Cacna1a/Klhl24/Itgb3/Gnao1/Tesc/Cacna1c/Cacna2d1/Kcnip3/Gem/Stac2/Plcb1/Hes1/Cnksr3/Igf1/Ace/Nalcn/Scn8a/Kcnj2/Stc2/Stc1/Agt	36
GO:0022612	gland morphogenesis	18/627	99/11457	5.92661e-06	0.000317301	0.000236344	Ptn/Mst1/Fgf7/Elf3/Areg/Cav1/Csf1/Pdgfa/Stat5a/Tbx2/Tgfa/Igf1/Lama5/Ntn1/Nfib/Wnt5a/Slit2/Ar	18
GO:0035150	regulation of tube size	17/627	90/11457	6.2837e-06	0.00032396	0.000241304	Adra1b/Acta2/Tbxa2r/Nos1/Cav1/Foxc1/Faah/Cacna1c/Bdkrb2/Npr3/Rgs2/Adra1d/Ace/Kdr/Agt/Avpr1a/Adm	17
GO:0035296	regulation of tube diameter	17/627	90/11457	6.2837e-06	0.00032396	0.000241304	Adra1b/Acta2/Tbxa2r/Nos1/Cav1/Foxc1/Faah/Cacna1c/Bdkrb2/Npr3/Rgs2/Adra1d/Ace/Kdr/Agt/Avpr1a/Adm	17
GO:0097746	blood vessel diameter maintenance	17/627	90/11457	6.2837e-06	0.00032396	0.000241304	Adra1b/Acta2/Tbxa2r/Nos1/Cav1/Foxc1/Faah/Cacna1c/Bdkrb2/Npr3/Rgs2/Adra1d/Ace/Kdr/Agt/Avpr1a/Adm	17
GO:0001667	ameboidal-type cell migration	38/627	323/11457	6.46189e-06	0.000329083	0.00024512	Kank1/Acta2/Tbxa2r/Gpld1/Acvrl1/Vil1/Lpxn/Fgf7/Col18a1/Gata2/Itgb4/Isl1/Arhgdib/Akap12/Pdlim1/Dab2ip/Pecam1/Itgb3/Plpp3/Thbs1/Sema4g/Stat5a/Daam2/Radil/Dcn/Fap/Igf1/Cyp1b1/Lama5/Sema3f/Wnt5a/Ptp4a3/Slit2/Kdr/Stc1/Agt/Vegfc/Fbn2	38
GO:0019226	transmission of nerve impulse	10/627	33/11457	6.59223e-06	0.000331676	0.000247052	P2rx7/Rapgef4/Cacng8/Ank3/Cacna1a/Npr2/Grik2/Scn8a/Agt/Avpr1a	10
GO:0044057	regulation of system process	39/627	336/11457	6.75086e-06	0.000334299	0.000249005	Pclo/Acpp/Adra1b/Tbxa2r/Rgs4/Nos1/Hopx/Lck/Spp1/Trf/Rapgef4/Ccn2/Isl1/Actn3/Cav1/Fbxo32/Pbx3/Faah/C1qtnf1/Gnao1/Cacna1c/Cacna2d1/Flt1/Grik2/Egr2/Rgs2/Igsf11/Adra1d/Nrg1/Tbx18/Igf1/Gas6/Ace/Kcnj2/Anpep/Stc1/Agt/Avpr1a/Adm	39
GO:0034329	cell junction assembly	34/627	275/11457	6.80446e-06	0.000334299	0.000249005	Ntrk1/Limch1/Musk/Pclo/Clstn3/Cldn9/Acvrl1/Hopx/Ocln/Itgb4/Add2/Nr1h4/Actn3/Cav1/Zdhhc2/Bdnf/Thbs2/Dnm3/Ramp2/Cacna1a/Pecam1/Itgb3/Adgrl2/Stau2/Nrg1/Adgrl1/Ace/Ntn1/Lrfn3/Wnt5a/Adgre5/Cdh26/Kdr/Agt	34
GO:0050806	positive regulation of synaptic transmission	18/627	101/11457	7.93718e-06	0.000377918	0.000281495	Ntrk1/Musk/Snap25/Clstn3/Ptn/Prrt1/Syt1/Nos1/Rgs14/Cacng8/Zdhhc2/Grik2/Igsf11/Nsg1/Nalcn/Enpp1/Ror2/Mme	18
GO:0001914	regulation of T cell mediated cytotoxicity	9/627	27/11457	8.00173e-06	0.000377918	0.000281495	P2rx7/Ulbp1/Il23a/Nckap1l/Tap2/H2-Q4/H2-K1/H2-T23/Ripk3	9
GO:0048771	tissue remodeling	21/627	131/11457	8.10584e-06	0.000377918	0.000281495	Adra1b/P2rx7/Ptn/Ctsk/Il23a/Acvrl1/Spp1/Trf/Elf3/Csf1r/Tph1/Cav1/Foxc1/Itgb3/Npr2/Stat5a/Npr3/Igf1/Cthrc1/Enpp1/Agt	21
GO:0050920	regulation of chemotaxis	21/627	131/11457	8.10584e-06	0.000377918	0.000281495	Hc/Ptn/Il23a/Mst1/Csf1r/Gpsm3/Pla2g7/Nckap1l/Mmp28/Csf1/Cd74/Thbs1/Sema4g/Pdgfra/Gas6/Lpar1/Sema3f/Wnt5a/Slit2/Kdr/Vegfc	21
GO:0045766	positive regulation of angiogenesis	19/627	111/11457	8.23528e-06	0.000377918	0.000281495	Ntrk1/Epha1/Hc/Tbxa2r/Acvrl1/Gata2/Isl1/Ramp2/Itgb3/Flt1/Thbs1/Cd34/Emilin2/Cyp1b1/Wnt5a/Adam12/Kdr/Adm/Vegfc	19
GO:1904018	positive regulation of vasculature development	19/627	111/11457	8.23528e-06	0.000377918	0.000281495	Ntrk1/Epha1/Hc/Tbxa2r/Acvrl1/Gata2/Isl1/Ramp2/Itgb3/Flt1/Thbs1/Cd34/Emilin2/Cyp1b1/Wnt5a/Adam12/Kdr/Adm/Vegfc	19
GO:0050818	regulation of coagulation	11/627	41/11457	8.46103e-06	0.000384057	0.000286068	Cd36/Tspan8/Tbxa2r/Procr/Cav1/Pdgfa/C1qtnf1/Thbs1/Cd34/Pdgfra/Emilin2	11
GO:0031343	positive regulation of cell killing	10/627	34/11457	8.88545e-06	0.000398985	0.000297187	Crtam/P2rx7/Ulbp1/Il23a/Tap2/Stat5b/Stat5a/H2-Q4/H2-K1/H2-T23	10
GO:0007610	behavior	44/627	404/11457	9.17639e-06	0.000407666	0.000303653	Ntrk1/Ccnd2/Musk/Mapk10/Snap25/Adra1b/Cntnap4/Ptn/Qrfp/Prrt1/Nos1/Pde8b/Casp1/Rgs14/Bdnf/Npas3/Crebrf/Cacna1a/Pbx3/Btg2/Lamb1/Gnao1/Stra6/Cacna1c/Kcnip3/Thbs1/Grik2/Egr2/Plcb1/Nrg1/Peg13/Synpo/Igf1/Ace/Sdk1/Rcan2/Scn8a/Auts2/Gpr176/Enpp1/Mme/Agt/Avpr1a/Ar	44
GO:0031589	cell-substrate adhesion	32/627	255/11457	9.29938e-06	0.000408781	0.000304484	Cd36/Epha1/Kank1/Limch1/Ptn/Cass4/Adamts12/Unc13d/Acvrl1/Myo1g/Lpxn/Spp1/Itgb4/Ccdc80/Ccn2/Actn3/Smoc1/Csf1/Pecam1/Itgb3/Lamb1/Thbs1/Cd34/Radil/Gas6/Lama5/Postn/Fbln1/Kdr/Itgbl1/Agt/Nid1	32
GO:0043408	regulation of MAPK cascade	48/627	458/11457	1.02111e-05	0.000444183	0.000330853	Cd36/Adra1b/Acta2/Nlrp12/P2rx7/Bank1/Csf1r/Rgs14/Ptpn6/Ccn2/Map4k1/Cav1/Akap12/Dusp9/Cavin3/Ackr3/Pdgfa/Dab2ip/Shc2/Itgb3/C1qtnf1/Cd74/Ghr/Flt1/Thbs1/Timp3/Grik2/Pdgfra/Rgs2/Plcb1/Nrg1/Tgfa/Sh3rf3/Cnksr3/Tpd52l1/Igf1/Gas6/Tnfrsf19/Lpar1/Prdm11/Wnt5a/Rps6ka6/Fbln1/Necab2/Kdr/Ror2/Agt/Ar	48
GO:0045639	positive regulation of myeloid cell differentiation	15/627	75/11457	1.06456e-05	0.000458311	0.000341377	Hcls1/Il23a/Hspa1a/Csf1r/Gata2/Nckap1l/Csf1/Itgb3/Zfp36l1/Cd74/Stat5b/Tesc/Stat5a/Fos/Ror2	15
GO:0002763	positive regulation of myeloid leukocyte differentiation	11/627	42/11457	1.09033e-05	0.000459921	0.000342576	Hcls1/Il23a/Csf1r/Csf1/Itgb3/Zfp36l1/Cd74/Tesc/Stat5a/Fos/Ror2	11
GO:0060443	mammary gland morphogenesis	11/627	42/11457	1.09033e-05	0.000459921	0.000342576	Mst1/Elf3/Areg/Cav1/Csf1/Stat5a/Tbx2/Ntn1/Wnt5a/Slit2/Ar	11
GO:0002521	leukocyte differentiation	44/627	408/11457	1.17845e-05	0.000479866	0.000357432	Crtam/Ntrk1/Gimap1/Hcls1/Dock10/Tnfsf13b/Batf/Il23a/Ifi213/Lrrc17/Duxbl1/Lck/Trf/Csf1r/Batf2/Gata2/Ptpn6/Il2rg/Nckap1l/Mfng/Bcl3/Nfil3/Hlx/Csf1/Itgb3/Zfp608/Zfp36l1/Cd74/Tcf7/Prxl2a/Stat5b/Tesc/Stat5a/Fos/Plcb1/Fstl3/Gas6/Sox12/Ripk3/Hmgb3/Enpp1/Ror2/Rora/Cebpa	44
GO:0090287	regulation of cellular response to growth factor stimulus	28/627	211/11457	1.17866e-05	0.000479866	0.000357432	Adamts12/Acvrl1/Cav1/Chrdl1/Ltbp1/Dab2ip/Ptprf/Lrp2/Slc2a10/Rasl11b/Thbs1/Htra1/Nrep/Dcn/Hes1/Fstl3/Wnt5a/Hhip/Ptp4a3/Eid2/Aspn/Slit2/Kdr/Agt/Lox/Vegfc/Fbn2/Tfap2b	28
GO:0001913	T cell mediated cytotoxicity	10/627	35/11457	1.18358e-05	0.000479866	0.000357432	P2rx7/Ulbp1/Il23a/Nckap1l/Tap2/Serpinb9b/H2-Q4/H2-K1/H2-T23/Ripk3	10
GO:0007156	homophilic cell adhesion via plasma membrane adhesion molecules	10/627	35/11457	1.18358e-05	0.000479866	0.000357432	Clstn3/Tenm3/Ptprf/Pecam1/Pcdh18/Pcdhb14/Igsf11/Pcdh19/Cdh26/Nectin3	10
GO:0001822	kidney development	27/627	200/11457	1.22627e-05	0.000492395	0.000366765	Hc/Spp1/Bdnf/Pdgfa/Mtss1/Foxc1/Itgb3/Lrp2/Osr2/Irx1/Stra6/Pdgfra/Basp1/Rarb/Hes1/Col4a4/Bicc1/Ace/Lama5/Pygo1/Wnt5a/Cfh/Slit2/Enpp1/Agt/Nid1/Tfap2b	27
GO:0072089	stem cell proliferation	17/627	95/11457	1.33514e-05	0.000531004	0.000395522	Dppa2/Irf6/Prrx1/Axin2/Zfp36l1/Osr2/Cd34/Rarb/Tbx18/Ace/Trim71/Nfib/Wnt5a/Fbln1/Kdr/Cebpa/Vegfc	17
GO:0043583	ear development	20/627	125/11457	1.36557e-05	0.000532368	0.000396539	Hpca/Bmp5/Gata2/Prrx1/Bdnf/Osr2/Stra6/Tbx2/Tbx18/Hes1/Igf1/H2-K1/Ntn1/Wnt5a/H2-T23/Lin7a/Cthrc1/Enpp1/Ror2/Cebpa	20
GO:0035265	organ growth	22/627	146/11457	1.37681e-05	0.000532368	0.000396539	Ccnd2/Adra1b/Rgs4/Fgf7/Hlx/Foxc1/Bnc2/Cacna1c/Npr2/Thbs1/Pdgfra/Tbx2/Rgs2/Rarb/Fbln5/Nrg1/Igf1/Kdr/Enpp1/Stc1/Agt/Ar	22
GO:0045165	cell fate commitment	22/627	146/11457	1.37681e-05	0.000532368	0.000396539	Nkx6-3/Batf/Il23a/Gata2/Casz1/Prrx1/Isl1/Chrdl1/Wnt10a/Nfia/Wnt9a/Tbx2/Nrg1/Tbx18/Hes1/Sox12/Nfib/Zfp521/Wnt5a/Kdr/Ror2/Ar	22
GO:0098660	inorganic ion transmembrane transport	41/627	372/11457	1.39786e-05	0.000535547	0.000398906	Hpca/P2rx7/Rgs4/Ano1/Cxcl9/Nos1/Atp2c2/Kcnn4/Hvcn1/Slc5a4a/Lck/Pkd1l1/Ptpn6/Ccn2/Slc9a9/Cabp1/Cacng8/Cav1/Slc37a2/Ank3/Rrad/Fxyd5/Cacna1a/Klhl24/Itgb3/Slc40a1/Kcnt2/Kcnn1/Tesc/Cacna1c/Cacna2d1/Kcnip3/Gem/Stac2/Plcb1/Cnksr3/Gas6/Nalcn/Slc6a15/Scn8a/Kcnj2	41
GO:0051924	regulation of calcium ion transport	23/627	157/11457	1.41593e-05	0.000537538	0.000400389	Hpca/P2rx7/Rgs4/Cxcl9/Nos1/Atp2c2/Ptpn6/Cabp1/Cav1/Rrad/Cacna1a/Itgb3/Gnao1/Cacna1c/Cacna2d1/Gem/Stac2/Hes1/Igf1/Ace/Stc2/Stc1/Agt	23
GO:0007259	receptor signaling pathway via JAK-STAT	17/627	96/11457	1.54152e-05	0.00057249	0.000426423	Hcls1/Il23a/Mst1/Lck/Csf1r/Isl1/Cav1/Bcl3/Pecam1/Ghr/Stat5b/Stra6/Stat5a/Hes1/Igf1/Cyp1b1/Agt	17
GO:0030879	mammary gland development	17/627	96/11457	1.54152e-05	0.00057249	0.000426423	Atp2c2/Mst1/Elf3/Irf6/Tph1/Areg/Cav1/Csf1/Stat5b/Stat5a/Tbx2/Tgfa/Igf1/Ntn1/Wnt5a/Slit2/Ar	17
GO:0050919	negative chemotaxis	9/627	29/11457	1.54912e-05	0.00057249	0.000426423	Pdgfa/Itgb3/Sema4g/Slit3/Nrg1/Ntn1/Sema3f/Wnt5a/Slit2	9
GO:0007599	hemostasis	18/627	106/11457	1.5888e-05	0.000582003	0.00043351	Cd36/Tspan8/Tbxa2r/Ptpn6/Tph1/Procr/Cav1/Pdgfa/Itgb3/C1qtnf1/Thbs1/Cd34/Pdgfra/Emilin2/Gas6/F13a1/Cfh/Fbln1	18
GO:0050679	positive regulation of epithelial cell proliferation	21/627	137/11457	1.64805e-05	0.000598458	0.000445766	Ccnd2/Bmp5/Ptn/Mst1/Acvrl1/Fgf7/Col18a1/Gata2/Cav1/Hlx/Itgb3/Osr2/Stat5a/Htra1/Tbx18/Tgfa/Igf1/Wnt5a/Kdr/Ar/Vegfc	21
GO:0060840	artery development	15/627	78/11457	1.75059e-05	0.000630212	0.000469419	Adgrf5/Mexis/Acvrl1/Prrx1/Ltbp1/Foxc1/Lrp2/Stra6/Slc2a10/Tbx2/Egr2/Hes1/Enpp1/Lox/Tfap2b	15
GO:1902105	regulation of leukocyte differentiation	28/627	216/11457	1.83376e-05	0.000654512	0.000487518	Crtam/Hcls1/Il23a/Lrrc17/Duxbl1/Lck/Csf1r/Gata2/Ptpn6/Il2rg/Nckap1l/Hlx/Csf1/Itgb3/Zfp608/Zfp36l1/Cd74/Tcf7/Prxl2a/Stat5b/Tesc/Stat5a/Fos/Fstl3/Gas6/Sox12/Hmgb3/Ror2	28
GO:0042391	regulation of membrane potential	29/627	228/11457	1.8789e-05	0.000664939	0.000495285	Cd36/Pclo/P2rx7/Ptn/Rgs4/Ano1/Nos1/Kcnn4/Casp1/Rapgef4/Cav1/Bdnf/Ank3/Pid1/Cacna1a/Cacna1c/Cacna2d1/Npr2/Grik2/Igsf11/Dcn/Tbx18/Gria3/Rgs7bp/Nalcn/Scn8a/Kcnj2/Kdr/Agt	29
GO:0043542	endothelial cell migration	23/627	160/11457	1.93799e-05	0.000680088	0.000506569	Tbxa2r/Gpld1/Acvrl1/Lpxn/Col18a1/Gata2/Dab2ip/Pecam1/Itgb3/Plpp3/Thbs1/Stat5a/Dcn/Fap/Igf1/Cyp1b1/Wnt5a/Ptp4a3/Slit2/Kdr/Stc1/Agt/Vegfc	23
GO:0098662	inorganic cation transmembrane transport	39/627	352/11457	2.00891e-05	0.000699101	0.000520731	Hpca/P2rx7/Rgs4/Cxcl9/Nos1/Atp2c2/Kcnn4/Hvcn1/Slc5a4a/Lck/Pkd1l1/Ptpn6/Ccn2/Slc9a9/Cabp1/Cacng8/Cav1/Ank3/Rrad/Fxyd5/Cacna1a/Klhl24/Itgb3/Slc40a1/Kcnt2/Kcnn1/Tesc/Cacna1c/Cacna2d1/Kcnip3/Gem/Stac2/Plcb1/Cnksr3/Gas6/Nalcn/Slc6a15/Scn8a/Kcnj2	39
GO:0050673	epithelial cell proliferation	35/627	302/11457	2.06962e-05	0.000709428	0.000528423	Ccnd2/Bmp5/Ptn/Mst1/Acvrl1/Fgf7/Col18a1/Gata2/Irf6/Isl1/Areg/Cav1/Hlx/Dab2ip/Mtss1/Itgb3/Zfp36l1/Osr2/Flt1/Thbs1/Cd34/Stat5a/Tbx2/Htra1/Tbx18/Tgfa/Hes1/Fap/Igf1/Lama5/Nfib/Wnt5a/Kdr/Ar/Vegfc	35
GO:0072091	regulation of stem cell proliferation	14/627	70/11457	2.08841e-05	0.000709428	0.000528423	Dppa2/Irf6/Prrx1/Zfp36l1/Osr2/Rarb/Tbx18/Ace/Nfib/Wnt5a/Fbln1/Kdr/Cebpa/Vegfc	14
GO:0061061	muscle structure development	49/627	484/11457	2.09017e-05	0.000709428	0.000528423	Ccnd2/Adra1b/Rgs4/Nrap/Cxcl9/Cavin4/Hopx/Csf1r/Casp1/Isl1/Actn3/Cav1/Bdnf/Pdlim1/Hlx/Plpp7/Ramp2/Mtss1/Foxc1/Btg2/Lrp2/Zfp36l1/Lamb1/Stra6/Pdgfra/Tbx2/Egr2/Fos/Rgs2/Pdlim4/Rarb/Plcb1/Nrg1/Tbx18/Hes1/Igf1/Lama5/Wnt5a/Hlf/Cfh/Eid2/Scn8a/Adamts15/Rora/Alx4/Agt/Lox/Adm/Nid1	49
GO:0048806	genitalia development	9/627	30/11457	2.10654e-05	0.000709428	0.000528423	Bmp5/Lrp2/Tcf7/Stra6/Npr2/Pdgfra/Wnt5a/Ror2/Ar	9
GO:0002685	regulation of leukocyte migration	20/627	129/11457	2.19986e-05	0.000734929	0.000547417	Hc/Ptn/Il23a/Mst1/Csf1r/Gpsm3/Pla2g7/Nckap1l/Mmp28/Csf1/Pecam1/Itgb3/Cd74/Thbs1/Plcb1/Gas6/Wnt5a/Ripk3/Slit2/Vegfc	20
GO:0043410	positive regulation of MAPK cascade	36/627	316/11457	2.29794e-05	0.000761604	0.000567287	Cd36/Adra1b/Acta2/P2rx7/Bank1/Csf1r/Ccn2/Map4k1/Akap12/Cavin3/Ackr3/Pdgfa/Dab2ip/Shc2/Itgb3/C1qtnf1/Cd74/Ghr/Flt1/Thbs1/Pdgfra/Plcb1/Nrg1/Tgfa/Sh3rf3/Tpd52l1/Igf1/Gas6/Tnfrsf19/Lpar1/Wnt5a/Necab2/Kdr/Ror2/Agt/Ar	36
GO:0048638	regulation of developmental growth	32/627	267/11457	2.38897e-05	0.00078554	0.000585115	Ccnd2/Musk/Foxs1/Rgs4/Syt1/Vil1/Hopx/Actn3/Bdnf/Hlx/Csf1/Foxc1/Rnf157/Ghr/Stat5b/Cacna1c/Olfm1/Sema4g/Stat5a/Tbx2/Rgs2/Plcb1/Nrg1/Cdkn1a/Igf1/Ntn1/Sema3f/Wnt5a/Slit2/Stc2/Agt/Ar	32
GO:0098655	monoatomic cation transmembrane transport	39/627	355/11457	2.43937e-05	0.000795844	0.00059279	Hpca/P2rx7/Rgs4/Cxcl9/Nos1/Atp2c2/Kcnn4/Hvcn1/Slc5a4a/Lck/Pkd1l1/Ptpn6/Ccn2/Slc9a9/Cabp1/Cacng8/Cav1/Ank3/Rrad/Fxyd5/Cacna1a/Klhl24/Itgb3/Slc40a1/Kcnt2/Kcnn1/Tesc/Cacna1c/Cacna2d1/Kcnip3/Gem/Stac2/Plcb1/Cnksr3/Gas6/Nalcn/Slc6a15/Scn8a/Kcnj2	39
GO:0008202	steroid metabolic process	24/627	174/11457	2.58881e-05	0.000836962	0.000623417	Bmp5/Afp/Soat2/Pde8b/Akr1c13/Spp1/Akr1c12/Nr1h4/Cubn/Sult2b1/Lrp2/Ces1a/Stat5b/Stat5a/Pdgfra/Hsd11b1/Akr1c14/Igf1/Cyp1b1/Pctp/Enpp1/Rora/Cebpa/Adm	24
GO:0040013	negative regulation of locomotion	29/627	232/11457	2.61464e-05	0.000836962	0.000623417	Epha1/Kank1/Limch1/Hc/Ptn/Tbxa2r/Srgap3/Ifitm1/Acvrl1/Arhgdib/Cav1/Mmp28/Dab2ip/Trp53inp1/Dpysl3/Cd74/Thbs1/Sema4g/Plcb1/Dcn/Nrg1/Emilin2/Cyp1b1/Sema3f/Wnt5a/Dpep1/Fbln1/Slit2/Stc1	29
GO:0030193	regulation of blood coagulation	10/627	38/11457	2.62553e-05	0.000836962	0.000623417	Cd36/Tspan8/Tbxa2r/Cav1/Pdgfa/C1qtnf1/Thbs1/Cd34/Pdgfra/Emilin2	10
GO:0001709	cell fate determination	7/627	18/11457	2.66268e-05	0.000839832	0.000625555	Nkx6-3/Gata2/Prrx1/Isl1/Chrdl1/Tbx2/Hes1	7
GO:0002690	positive regulation of leukocyte chemotaxis	12/627	54/11457	2.67475e-05	0.000839832	0.000625555	Ptn/Il23a/Csf1r/Gpsm3/Pla2g7/Nckap1l/Csf1/Cd74/Thbs1/Gas6/Wnt5a/Vegfc	12
GO:0050678	regulation of epithelial cell proliferation	31/627	257/11457	2.81751e-05	0.000872119	0.000649605	Ccnd2/Bmp5/Ptn/Mst1/Acvrl1/Fgf7/Col18a1/Gata2/Irf6/Isl1/Cav1/Hlx/Dab2ip/Mtss1/Itgb3/Zfp36l1/Osr2/Flt1/Thbs1/Stat5a/Htra1/Tbx18/Tgfa/Hes1/Igf1/Lama5/Nfib/Wnt5a/Kdr/Ar/Vegfc	31
GO:0034762	regulation of transmembrane transport	36/627	319/11457	2.81935e-05	0.000872119	0.000649605	Hpca/P2rx7/Rgs4/Prrt1/Cxcl9/Nos1/Hvcn1/Ocln/Ptpn6/Cabp1/Cacng8/Cav1/Ank3/Rrad/Fxyd5/Pid1/Cacna1a/Klhl24/Itgb3/Tesc/Cacna1c/Cacna2d1/Kcnip3/Thbs1/Gem/Rgs2/Stac2/Plcb1/Cnksr3/Igf1/Ace/Nalcn/Scn8a/Kcnj2/Enpp1/Agt	36
GO:0070372	regulation of ERK1 and ERK2 cascade	25/627	187/11457	3.02701e-05	0.000926825	0.000690353	Cd36/Acta2/Nlrp12/Csf1r/Rgs14/Ptpn6/Ccn2/Cav1/Akap12/Cavin3/Ackr3/Pdgfa/Dab2ip/Itgb3/Cd74/Timp3/Pdgfra/Nrg1/Cnksr3/Igf1/Gas6/Rps6ka6/Fbln1/Necab2/Kdr	25
GO:0002706	regulation of lymphocyte mediated immunity	17/627	101/11457	3.06279e-05	0.000926825	0.000690353	Crtam/P2rx7/Ulbp1/Il23a/Ptpn6/Nckap1l/Arid5a/Tap2/Serpinb9b/Stat5b/Stat5a/H2-Q4/H2-K1/Tap1/H2-T23/Ripk3/Svep1	17
GO:0097696	receptor signaling pathway via STAT	17/627	101/11457	3.06279e-05	0.000926825	0.000690353	Hcls1/Il23a/Mst1/Lck/Csf1r/Isl1/Cav1/Bcl3/Pecam1/Ghr/Stat5b/Stra6/Stat5a/Hes1/Igf1/Cyp1b1/Agt	17
GO:0030855	epithelial cell differentiation	41/627	385/11457	3.14942e-05	0.000946186	0.000704774	Ntrk1/Bmp5/Nkx6-3/Cryaa/Syne4/Krt76/Cers3/Slc4a5/Acvrl1/Elf3/Col18a1/Csf1r/Gata2/Irf6/Sult2b1/Tagln2/Cav1/Pecam1/Mtss1/Foxc1/Bdh2/Zfp36l1/Ces1a/Stat5b/Npr2/Stat5a/Wnt9a/Basp1/Rarb/Plcb1/Macroh2a2/Nrg1/Hes1/Igf1/Nfib/Wnt5a/Kdr/Stc1/Cebpa/Agt/Ar	41
GO:0060047	heart contraction	19/627	122/11457	3.29344e-05	0.000981914	0.000731386	Adra1b/Rgs4/Nos1/Hopx/Ccn2/Isl1/Cav1/Gnao1/Cacna1c/Cacna2d1/Rgs2/Adra1d/Tbx18/Ace/Kcnj2/Stc1/Agt/Avpr1a/Adm	19
GO:0002460	adaptive immune response based on somatic recombination of immune receptors built from immunoglobulin superfamily domains	25/627	188/11457	3.31537e-05	0.000981914	0.000731386	Mbl2/Hc/P2rx7/Ulbp1/Tnfsf13b/Batf/Il23a/Unc13d/Myo1g/Ptpn6/Nckap1l/Arid5a/Bcl3/Hlx/Tap2/Serpinb9b/Cd74/H2-Q4/H2-K1/H2-T23/Ripk3/Cfh/Enpp1/Rora/Svep1	25
GO:0060348	bone development	23/627	166/11457	3.53158e-05	0.00103812	0.00077325	Adamts12/Lrrc17/Ptpn6/Actn3/Pdgfa/Foxc1/Axin2/Bnc2/Osr2/Npr2/Thbs1/Timp3/Rarb/Fbln5/Igf1/Ogn/Cfh/Kdr/Enpp1/Stc1/Notum/Lox/Sp5	23
GO:0048639	positive regulation of developmental growth	21/627	144/11457	3.55486e-05	0.00103812	0.00077325	Ccnd2/Musk/Foxs1/Syt1/Vil1/Hopx/Actn3/Bdnf/Hlx/Csf1/Rnf157/Ghr/Stat5b/Stat5a/Tbx2/Plcb1/Nrg1/Igf1/Ntn1/Wnt5a/Agt	21
GO:0098868	bone growth	8/627	25/11457	3.62513e-05	0.00105129	0.000783059	Bnc2/Npr2/Thbs1/Rarb/Fbln5/Kdr/Enpp1/Stc1	8
GO:0050865	regulation of cell activation	41/627	388/11457	3.77017e-05	0.0010815	0.000805564	Crtam/Rasal3/Acta2/Ulbp1/Adgrf5/Tnfsf13b/Milr1/Il23a/Unc13d/Duxbl1/Lck/Bank1/Csf1r/Gata2/Ptpn6/Il2rg/Nckap1l/Ccn2/Cav1/Hlx/Pdgfa/Zfp608/Zfp36l1/C1qtnf1/Cd74/Tcf7/Stat5b/Thbs1/Stat5a/Pdgfra/Emilin2/Cdkn1a/Hes1/Igf1/Gas6/Sox12/Wnt5a/Ripk3/Hmgb3/Rora/Cebpa	41
GO:0050921	positive regulation of chemotaxis	15/627	83/11457	3.78111e-05	0.0010815	0.000805564	Ptn/Il23a/Csf1r/Gpsm3/Pla2g7/Nckap1l/Csf1/Cd74/Thbs1/Gas6/Lpar1/Wnt5a/Slit2/Kdr/Vegfc	15
GO:0014009	glial cell proliferation	12/627	56/11457	3.93787e-05	0.00111868	0.000833255	Ptn/Csf1r/Areg/Csf1/Nfia/Flt1/Nrg1/Hes1/Igf1/Ntn1/Nfib/Vegfc	12
GO:0007596	blood coagulation	17/627	103/11457	3.97419e-05	0.00112137	0.000835259	Cd36/Tspan8/Tbxa2r/Ptpn6/Procr/Cav1/Pdgfa/Itgb3/C1qtnf1/Thbs1/Cd34/Pdgfra/Emilin2/Gas6/F13a1/Cfh/Fbln1	17
GO:0010720	positive regulation of cell development	38/627	350/11457	4.02069e-05	0.00112687	0.000839359	Hcls1/Ptn/Il23a/Lck/Trf/Csf1r/Rgs14/Il2rg/Nckap1l/Actn3/Bdnf/Hlx/Csf1/Ptprf/Itgb3/Obsl1/Lrp2/Zfp36l1/Cd74/Stat5b/Tesc/Flt1/Stat5a/Egr2/Fos/Stau2/Nrg1/Hes1/Igf1/Gas6/Ace/Ntn1/Sox12/Wnt5a/Kdr/Ror2/Mme/Vegfc	38
GO:1901890	positive regulation of cell junction assembly	13/627	65/11457	4.10257e-05	0.00114215	0.000850743	Ntrk1/Musk/Clstn3/Hopx/Cav1/Bdnf/Thbs2/Adgrl2/Stau2/Adgrl1/Adgre5/Kdr/Agt	13
GO:0002761	regulation of myeloid leukocyte differentiation	15/627	84/11457	4.37499e-05	0.00120197	0.000895298	Hcls1/Il23a/Lrrc17/Csf1r/Gata2/Csf1/Itgb3/Zfp36l1/Cd74/Prxl2a/Tesc/Stat5a/Fos/Fstl3/Ror2	15
GO:0030282	bone mineralization	15/627	84/11457	4.37499e-05	0.00120197	0.000895298	P2rx7/Ptn/Spp1/Csf1r/Actn3/Mtss1/Axin2/Osr2/Igf1/Aspn/Omd/Enpp1/Notum/Lox/Fbn2	15
GO:1903034	regulation of response to wounding	17/627	104/11457	4.51414e-05	0.0012321	0.000917736	Cd36/Kank1/Tspan8/Acta2/Ptn/Tbxa2r/Scarf1/Vil1/Cav1/Pdgfa/Ptprf/C1qtnf1/Thbs1/Cd34/Pdgfra/Nrg1/Emilin2	17
GO:0007600	sensory perception	27/627	215/11457	4.54391e-05	0.00123217	0.000917789	Ntrk1/Cd36/Acpp/Srrm4/P2rx7/Cryaa/Ano1/Rpgrip1/Serpinb6b/Nos1/Dlg2/Cabp1/Cacna1a/Lrp2/Ptges/Kcnip3/Npr2/Mc1r/Grik2/Tbx18/Igf1/Ace/Cfh/Scn8a/Enpp1/Mme/Lum	27
GO:0019233	sensory perception of pain	12/627	57/11457	4.74361e-05	0.00127802	0.000951944	Ntrk1/Acpp/P2rx7/Ano1/Nos1/Dlg2/Cacna1a/Ptges/Kcnip3/Mc1r/Ace/Mme	12
GO:0002228	natural killer cell mediated immunity	9/627	33/11457	4.89835e-05	0.00129465	0.000964332	Crtam/Ulbp1/Unc13d/Ptpn6/Tap2/Serpinb9b/Stat5b/Stat5a/Tap1	9
GO:0042267	natural killer cell mediated cytotoxicity	9/627	33/11457	4.89835e-05	0.00129465	0.000964332	Crtam/Ulbp1/Unc13d/Ptpn6/Tap2/Serpinb9b/Stat5b/Stat5a/Tap1	9
GO:0051965	positive regulation of synapse assembly	9/627	33/11457	4.89835e-05	0.00129465	0.000964332	Ntrk1/Musk/Clstn3/Bdnf/Thbs2/Adgrl2/Stau2/Adgrl1/Adgre5	9
GO:0050817	coagulation	17/627	105/11457	5.11798e-05	0.00133914	0.000997471	Cd36/Tspan8/Tbxa2r/Ptpn6/Procr/Cav1/Pdgfa/Itgb3/C1qtnf1/Thbs1/Cd34/Pdgfra/Emilin2/Gas6/F13a1/Cfh/Fbln1	17
GO:0048732	gland development	33/627	290/11457	5.13082e-05	0.00133914	0.000997471	Ptn/Krt76/Atp2c2/Mst1/Fgf7/Elf3/Gata2/Irf6/Tph1/Isl1/Areg/Cav1/Hlx/Wnt10a/Csf1/Pdgfa/Foxc1/Stat5b/Stra6/Stat5a/Pdgfra/Tbx2/Tgfa/Hes1/Igf1/Lama5/Ntn1/Nfib/Wnt5a/Ripk3/Slit2/Cebpa/Ar	33
GO:0071674	mononuclear cell migration	16/627	95/11457	5.17301e-05	0.00134177	0.000999428	Crtam/Cxcl16/Nlrp12/Myo1g/Csf1r/Pla2g7/Csf1/Pecam1/Itgb3/Flt1/Thbs1/Plcb1/Gas6/Wnt5a/Ripk3/Slit2	16
GO:0003073	regulation of systemic arterial blood pressure	11/627	49/11457	5.2294e-05	0.00134802	0.00100409	Adra1b/Slc4a5/Adra1d/Gas6/Ace/Postn/Kdr/Agt/Avpr1a/Adm/Ar	11
GO:0007416	synapse assembly	18/627	116/11457	5.54443e-05	0.00142046	0.00105804	Ntrk1/Musk/Pclo/Clstn3/Add2/Zdhhc2/Bdnf/Thbs2/Dnm3/Cacna1a/Adgrl2/Stau2/Nrg1/Adgrl1/Ntn1/Lrfn3/Wnt5a/Adgre5	18
GO:0007588	excretion	7/627	20/11457	5.89103e-05	0.00150006	0.00111733	Cacna1c/Adra1d/Ace/Anpep/Stc1/Agt/Avpr1a	7
GO:0048167	regulation of synaptic plasticity	20/627	138/11457	5.93753e-05	0.00150273	0.00111932	Musk/Snap25/Ptn/Prrt1/Nos1/Rgs14/Zdhhc2/Chrdl1/Bdnf/Grik2/Cpeb1/Igsf11/Stau2/Nsg1/Synpo/Ace/Kdr/Enpp1/Mme/Agt	20
GO:0007611	learning or memory	23/627	172/11457	6.21736e-05	0.00156034	0.00116223	Ntrk1/Ccnd2/Musk/Snap25/Adra1b/Ptn/Prrt1/Pde8b/Casp1/Rgs14/Bdnf/Btg2/Lamb1/Stra6/Cacna1c/Plcb1/Nrg1/Peg13/Synpo/Igf1/Rcan2/Mme/Agt	23
GO:0015711	organic anion transport	26/627	207/11457	6.23985e-05	0.00156034	0.00116223	Cd36/Slc27a6/P2rx7/Rgs4/Pla2r1/Slc4a5/Nr1h4/Bdnf/Slc37a2/Nfkbie/Cacna1a/Sv2a/Slc16a3/Lrp2/Ptges/Ces1a/Bdkrb2/Slc2a10/Thbs1/Rgs2/Ace/Slco3a1/Slc6a15/Agt/Avpr1a/Crabp1	26
GO:0010463	mesenchymal cell proliferation	9/627	34/11457	6.34188e-05	0.00157641	0.0011742	Ptn/Fgf7/Prrx1/Pdgfa/Tbx2/Tbx18/Nfib/Wnt5a/Kdr	9
GO:0032835	glomerulus development	10/627	42/11457	6.70069e-05	0.00165349	0.00123161	Hc/Mtss1/Foxc1/Itgb3/Pdgfra/Basp1/Hes1/Col4a4/Cfh/Nid1	10
GO:0090288	negative regulation of cellular response to growth factor stimulus	13/627	68/11457	6.73652e-05	0.00165349	0.00123161	Adamts12/Cav1/Chrdl1/Dab2ip/Ptprf/Lrp2/Thbs1/Htra1/Dcn/Fstl3/Wnt5a/Slit2/Agt	13
GO:0015849	organic acid transport	23/627	173/11457	6.81034e-05	0.00165349	0.00123161	Cd36/Slc27a6/P2rx7/Rgs4/Pla2r1/Nr1h4/Bdnf/Nfkbie/Cacna1a/Sv2a/Slc16a3/Lrp2/Ptges/Ces1a/Bdkrb2/Thbs1/Rgs2/Ace/Slco3a1/Slc6a15/Agt/Avpr1a/Crabp1	23
GO:0046942	carboxylic acid transport	23/627	173/11457	6.81034e-05	0.00165349	0.00123161	Cd36/Slc27a6/P2rx7/Rgs4/Pla2r1/Nr1h4/Bdnf/Nfkbie/Cacna1a/Sv2a/Slc16a3/Lrp2/Ptges/Ces1a/Bdkrb2/Thbs1/Rgs2/Ace/Slco3a1/Slc6a15/Agt/Avpr1a/Crabp1	23
GO:0034220	monoatomic ion transmembrane transport	41/627	399/11457	7.12588e-05	0.0017201	0.00128123	Hpca/P2rx7/Rgs4/Ano1/Cxcl9/Nos1/Atp2c2/Kcnn4/Hvcn1/Slc5a4a/Lck/Pkd1l1/Ptpn6/Ccn2/Slc9a9/Cabp1/Cacng8/Cav1/Ank3/Rrad/Fxyd5/Cacna1a/Klhl24/Itgb3/Slc40a1/Kcnt2/Kcnn1/Tesc/Cacna1c/Cacna2d1/Kcnip3/Gem/Stac2/Plcb1/Cnksr3/Gas6/Gria3/Nalcn/Slc6a15/Scn8a/Kcnj2	41
GO:2000146	negative regulation of cell motility	26/627	209/11457	7.34429e-05	0.00176263	0.00131291	Epha1/Kank1/Limch1/Hc/Ptn/Tbxa2r/Srgap3/Ifitm1/Acvrl1/Arhgdib/Cav1/Mmp28/Dab2ip/Trp53inp1/Dpysl3/Cd74/Thbs1/Plcb1/Dcn/Nrg1/Emilin2/Cyp1b1/Dpep1/Fbln1/Slit2/Stc1	26
GO:0002573	myeloid leukocyte differentiation	22/627	163/11457	7.76013e-05	0.00185179	0.00137932	Hcls1/Batf/Il23a/Ifi213/Lrrc17/Trf/Csf1r/Batf2/Gata2/Csf1/Itgb3/Zfp36l1/Cd74/Prxl2a/Tesc/Stat5a/Fos/Plcb1/Fstl3/Enpp1/Ror2/Cebpa	22
GO:0002027	regulation of heart rate	10/627	43/11457	8.3089e-05	0.00196481	0.00146351	Adra1b/Rgs4/Isl1/Cav1/Cacna1c/Cacna2d1/Kcnj2/Agt/Avpr1a/Adm	10
GO:0010942	positive regulation of cell death	48/627	497/11457	8.34363e-05	0.00196481	0.00146351	Ntrk1/Cd36/Musk/P2rx7/Ptn/Ctsk/Pla2r1/Gpld1/Nos1/Mst1/Lck/Col18a1/Casp1/Ccn2/Cav1/Ecscr/Akap12/Dab2ip/Ptprf/Fbxo32/Axin2/Bmf/Trp53inp1/Olfm1/Thbs1/Timp3/Grik2/Fos/Htra1/Rarb/Emilin2/Cdkn1a/Tpd52l1/Fap/Ace/Optn/Lpar1/Cyp1b1/Prdm11/Wnt5a/Ripk3/Aldh1a1/Mmp3/Slit2/Prodh/Agt/Adm/Tfap2b	48
GO:0002715	regulation of natural killer cell mediated immunity	7/627	21/11457	8.42198e-05	0.00196481	0.00146351	Crtam/Ulbp1/Tap2/Serpinb9b/Stat5b/Stat5a/Tap1	7
GO:0042269	regulation of natural killer cell mediated cytotoxicity	7/627	21/11457	8.42198e-05	0.00196481	0.00146351	Crtam/Ulbp1/Tap2/Serpinb9b/Stat5b/Stat5a/Tap1	7
GO:0098742	cell-cell adhesion via plasma-membrane adhesion molecules	14/627	79/11457	8.52339e-05	0.00197743	0.0014729	Crtam/Clstn3/Tenm3/Ptprf/Pecam1/Pcdh18/Pcdhb14/Igsf11/Nrg1/Adgrl1/Lrfn3/Pcdh19/Cdh26/Nectin3	14
GO:1903706	regulation of hemopoiesis	32/627	285/11457	8.5968e-05	0.00198344	0.00147738	Crtam/Hcls1/Ptn/Il23a/Lrrc17/Duxbl1/Hspa1a/Lck/Csf1r/Gata2/Ptpn6/Il2rg/Nckap1l/Hlx/Csf1/Itgb3/Zfp608/Zfp36l1/Cd74/Tcf7/Prxl2a/Stat5b/Tesc/Stat5a/Fos/Fstl3/Gas6/Sox12/Hmgb3/Ror2/Cebpa/Lox	32
GO:0033674	positive regulation of kinase activity	33/627	298/11457	8.76507e-05	0.00201115	0.00149802	Ntrk1/Epha1/Ccnd2/Musk/P2rx7/Il23a/Cass4/Abi3/Csf1r/Areg/Csf1/Pdgfa/Dab2ip/Itgb3/Axin2/Cd74/Ghr/Flt1/Thbs1/Pdgfra/Nrg1/Tgfa/Cdkn1a/Tpd52l1/Igf1/Gas6/Ace/Wnt5a/Ripk3/Kdr/Ror2/Agt/Vegfc	33
GO:0014068	positive regulation of phosphatidylinositol 3-kinase signaling	11/627	52/11457	9.33387e-05	0.00212996	0.00158652	Ntrk1/Hcls1/Musk/Ptpn6/Pdgfa/Flt1/Dcn/Igf1/Kdr/Ror2/Agt	11
GO:0001508	action potential	12/627	61/11457	9.55867e-05	0.0021694	0.0016159	Cd36/P2rx7/Rapgef4/Cav1/Ank3/Cacna1c/Cacna2d1/Npr2/Grik2/Tbx18/Scn8a/Kcnj2	12
GO:0045586	regulation of gamma-delta T cell differentiation	5/627	10/11457	9.67182e-05	0.00217148	0.00161744	Lck/Nckap1l/Tcf7/Stat5b/Stat5a	5
GO:0046643	regulation of gamma-delta T cell activation	5/627	10/11457	9.67182e-05	0.00217148	0.00161744	Lck/Nckap1l/Tcf7/Stat5b/Stat5a	5
GO:0048593	camera-type eye morphogenesis	14/627	80/11457	9.82181e-05	0.00219336	0.00163374	Cryaa/Ptn/Rpgrip1/Casz1/Tenm3/Stra6/Flt1/Tbx2/Fjx1/Zhx2/Cfh/Aldh1a1/Kdr/Nectin3	14
GO:0003015	heart process	19/627	132/11457	9.91292e-05	0.00220193	0.00164013	Adra1b/Rgs4/Nos1/Hopx/Ccn2/Isl1/Cav1/Gnao1/Cacna1c/Cacna2d1/Rgs2/Adra1d/Tbx18/Ace/Kcnj2/Stc1/Agt/Avpr1a/Adm	19
GO:0034765	regulation of monoatomic ion transmembrane transport	27/627	225/11457	0.00010002	0.00220997	0.00164611	Hpca/P2rx7/Rgs4/Cxcl9/Nos1/Hvcn1/Ptpn6/Cabp1/Cacng8/Cav1/Ank3/Rrad/Fxyd5/Cacna1a/Klhl24/Itgb3/Tesc/Cacna1c/Cacna2d1/Kcnip3/Gem/Stac2/Plcb1/Cnksr3/Nalcn/Scn8a/Kcnj2	27
GO:0030336	negative regulation of cell migration	25/627	201/11457	0.00010087	0.00221701	0.00165136	Epha1/Kank1/Limch1/Hc/Ptn/Tbxa2r/Srgap3/Ifitm1/Acvrl1/Arhgdib/Cav1/Mmp28/Dab2ip/Trp53inp1/Dpysl3/Cd74/Thbs1/Plcb1/Dcn/Nrg1/Emilin2/Cyp1b1/Dpep1/Slit2/Stc1	25
GO:0019229	regulation of vasoconstriction	10/627	44/11457	0.000102329	0.0022373	0.00166647	Adra1b/Tbxa2r/Nos1/Cav1/Faah/Cacna1c/Adra1d/Ace/Avpr1a/Adm	10
GO:0002252	immune effector process	36/627	341/11457	0.000113759	0.00247425	0.00184296	Crtam/Cd36/Mbl2/Dock10/Hc/P2rx7/Ulbp1/Milr1/Batf/Il23a/Unc13d/Myo1g/Casp1/Gata2/Ptpn6/Nckap1l/Arid5a/Mfng/Bcl3/Hlx/Tap2/Serpinb9b/Cd74/Stat5b/Stat5a/H2-Q4/H2-K1/Ace/Tap1/Wnt5a/H2-T23/Ripk3/Cfh/Enpp1/Rora/Svep1	36
GO:0045777	positive regulation of blood pressure	7/627	22/11457	0.000117732	0.00254741	0.00189745	Adra1b/Qrfp/Tbxa2r/Adra1d/Ace/Agt/Avpr1a	7
GO:0007178	transmembrane receptor protein serine/threonine kinase signaling pathway	29/627	253/11457	0.000127256	0.00273927	0.00204037	Bmp5/Afp/Amhr2/Acvrl1/Lpxn/Trf/Cav1/Chrdl1/Ltbp1/Nfia/Lrp2/Slc2a10/Rasl11b/Thbs1/Fos/Htra1/Nrep/Hes1/Rbpms/Fstl3/Wnt5a/Eid2/Aspn/Kdr/Ror2/Lox/Fbn2/Tfap2b/Gdf10	29
GO:0060041	retina development in camera-type eye	15/627	92/11457	0.000128934	0.00276118	0.00205669	Ptn/Col4a1/Rpgrip1/Slc4a5/Acvrl1/Casz1/Nfia/Pdgfra/Hes1/Cyp1b1/Nfib/Fjx1/Zhx2/Cfh/Nectin3	15
GO:0019228	neuronal action potential	6/627	16/11457	0.000130934	0.00278337	0.00207321	P2rx7/Rapgef4/Ank3/Npr2/Grik2/Scn8a	6
GO:0048015	phosphatidylinositol-mediated signaling	17/627	113/11457	0.000131303	0.00278337	0.00207321	Ntrk1/Hcls1/Musk/Csf1r/Ptpn6/Pdgfa/Dab2ip/Zfp36l1/Flt1/Pdgfra/Npr3/Plcb1/Dcn/Igf1/Kdr/Ror2/Agt	17
GO:0055123	digestive system development	13/627	73/11457	0.000144017	0.00303746	0.00226248	Hlx/Pdgfa/Tcf7/Stra6/Npr2/Pdgfra/Tbx2/Rarb/Hes1/Clmp/Igf1/Wnt5a/Alx4	13
GO:0048017	inositol lipid-mediated signaling	17/627	114/11457	0.000146645	0.00307733	0.00229217	Ntrk1/Hcls1/Musk/Csf1r/Ptpn6/Pdgfa/Dab2ip/Zfp36l1/Flt1/Pdgfra/Npr3/Plcb1/Dcn/Igf1/Kdr/Ror2/Agt	17
GO:0002703	regulation of leukocyte mediated immunity	19/627	136/11457	0.000148531	0.00310133	0.00231005	Crtam/P2rx7/Ulbp1/Il23a/Unc13d/Gata2/Ptpn6/Nckap1l/Arid5a/Tap2/Serpinb9b/Stat5b/Stat5a/H2-Q4/H2-K1/Tap1/H2-T23/Ripk3/Svep1	19
GO:0042531	positive regulation of tyrosine phosphorylation of STAT protein	8/627	30/11457	0.000153797	0.0031953	0.00238005	Hcls1/Il23a/Lck/Csf1r/Isl1/Pecam1/Hes1/Igf1	8
GO:0048565	digestive tract development	12/627	64/11457	0.000155048	0.00320534	0.00238752	Hlx/Pdgfa/Tcf7/Stra6/Npr2/Pdgfra/Tbx2/Rarb/Hes1/Clmp/Wnt5a/Alx4	12
GO:0048839	inner ear development	16/627	104/11457	0.000157341	0.00323672	0.0024109	Hpca/Gata2/Prrx1/Bdnf/Tbx2/Tbx18/Hes1/Igf1/H2-K1/Ntn1/Wnt5a/H2-T23/Lin7a/Cthrc1/Ror2/Cebpa	16
GO:0001916	positive regulation of T cell mediated cytotoxicity	7/627	23/11457	0.000161313	0.00327011	0.00243577	P2rx7/Ulbp1/Il23a/Tap2/H2-Q4/H2-K1/H2-T23	7
GO:0007193	adenylate cyclase-inhibiting G protein-coupled receptor signaling pathway	7/627	23/11457	0.000161313	0.00327011	0.00243577	Akap12/Itgb3/Npr3/Rgs2/Lpar1/Chrm4/Gpr176	7
GO:0045577	regulation of B cell differentiation	7/627	23/11457	0.000161313	0.00327011	0.00243577	Ptpn6/Il2rg/Nckap1l/Zfp36l1/Stat5b/Stat5a/Hmgb3	7
GO:0010594	regulation of endothelial cell migration	18/627	126/11457	0.000165429	0.00330457	0.00246144	Tbxa2r/Gpld1/Acvrl1/Col18a1/Gata2/Dab2ip/Itgb3/Plpp3/Thbs1/Stat5a/Dcn/Igf1/Wnt5a/Slit2/Kdr/Stc1/Agt/Vegfc	18
GO:0002250	adaptive immune response	27/627	232/11457	0.000167611	0.00330457	0.00246144	Crtam/Mbl2/Hc/P2rx7/Ulbp1/Tnfsf13b/Batf/Il23a/Unc13d/Myo1g/Ptpn6/Nckap1l/Arid5a/Bcl3/Hlx/Tap2/Serpinb9b/Cd74/H2-Q4/H2-K1/Tap1/H2-T23/Ripk3/Cfh/Enpp1/Rora/Svep1	27
GO:0010631	epithelial cell migration	27/627	232/11457	0.000167611	0.00330457	0.00246144	Kank1/Tbxa2r/Gpld1/Acvrl1/Vil1/Lpxn/Fgf7/Col18a1/Gata2/Dab2ip/Pecam1/Itgb3/Plpp3/Thbs1/Stat5a/Daam2/Dcn/Fap/Igf1/Cyp1b1/Wnt5a/Ptp4a3/Slit2/Kdr/Stc1/Agt/Vegfc	27
GO:0090130	tissue migration	27/627	232/11457	0.000167611	0.00330457	0.00246144	Kank1/Tbxa2r/Gpld1/Acvrl1/Vil1/Lpxn/Fgf7/Col18a1/Gata2/Dab2ip/Pecam1/Itgb3/Plpp3/Thbs1/Stat5a/Daam2/Dcn/Fap/Igf1/Cyp1b1/Wnt5a/Ptp4a3/Slit2/Kdr/Stc1/Agt/Vegfc	27
GO:0090132	epithelium migration	27/627	232/11457	0.000167611	0.00330457	0.00246144	Kank1/Tbxa2r/Gpld1/Acvrl1/Vil1/Lpxn/Fgf7/Col18a1/Gata2/Dab2ip/Pecam1/Itgb3/Plpp3/Thbs1/Stat5a/Daam2/Dcn/Fap/Igf1/Cyp1b1/Wnt5a/Ptp4a3/Slit2/Kdr/Stc1/Agt/Vegfc	27
GO:0042492	gamma-delta T cell differentiation	5/627	11/11457	0.000169344	0.00330457	0.00246144	Lck/Nckap1l/Tcf7/Stat5b/Stat5a	5
GO:0086091	regulation of heart rate by cardiac conduction	5/627	11/11457	0.000169344	0.00330457	0.00246144	Isl1/Cav1/Cacna1c/Cacna2d1/Kcnj2	5
GO:1904181	positive regulation of membrane depolarization	5/627	11/11457	0.000169344	0.00330457	0.00246144	P2rx7/Ank3/Cacna1c/Dcn/Kdr	5
GO:0045637	regulation of myeloid cell differentiation	20/627	149/11457	0.000175069	0.00340041	0.00253282	Hcls1/Il23a/Lrrc17/Hspa1a/Csf1r/Gata2/Nckap1l/Csf1/Itgb3/Zfp36l1/Cd74/Prxl2a/Stat5b/Tesc/Stat5a/Fos/Fstl3/Hmgb3/Ror2/Lox	20
GO:0003014	renal system process	12/627	65/11457	0.000180864	0.0034967	0.00260455	Adgrf5/Slc4a5/Cacna1c/Npr3/Adra1d/Gas6/Ace/Anpep/Stc1/Agt/Avpr1a/Adm	12
GO:0035924	cellular response to vascular endothelial growth factor stimulus	10/627	47/11457	0.000184076	0.00352616	0.00262649	Adamts12/Dab2ip/Ramp2/Foxc1/Flt1/Pdgfra/Dcn/Ptp4a3/Kdr/Vegfc	10
GO:0051899	membrane depolarization	10/627	47/11457	0.000184076	0.00352616	0.00262649	P2rx7/Casp1/Cav1/Ank3/Cacna1a/Cacna1c/Cacna2d1/Dcn/Scn8a/Kdr	10
GO:0002009	morphogenesis of an epithelium	37/627	363/11457	0.000188054	0.00357098	0.00265988	Bmp5/Col4a1/Syne4/Adamts12/Mst1/Acvrl1/Fgf7/Arhgap24/Areg/Wnt10a/Csf1/Pdgfa/Mtss1/Lrp2/Irx1/Flt1/Stat5a/Pdgfra/Tbx2/Tbx18/Hes1/Igf1/Lama5/Ntn1/Trim71/Wnt5a/Hhip/Aldh1a1/Slit2/Kdr/Cthrc1/Enpp1/Ror2/Agt/Adm/Ar/Vegfc	37
GO:0015718	monocarboxylic acid transport	13/627	75/11457	0.000191109	0.00357098	0.00265988	Cd36/Slc27a6/P2rx7/Pla2r1/Nr1h4/Slc16a3/Ptges/Ces1a/Bdkrb2/Thbs1/Ace/Slco3a1/Crabp1	13
GO:0051963	regulation of synapse assembly	13/627	75/11457	0.000191109	0.00357098	0.00265988	Ntrk1/Musk/Clstn3/Bdnf/Thbs2/Adgrl2/Stau2/Nrg1/Adgrl1/Ntn1/Lrfn3/Wnt5a/Adgre5	13
GO:0072006	nephron development	14/627	85/11457	0.000192194	0.00357098	0.00265988	Hc/Mtss1/Foxc1/Itgb3/Irx1/Pdgfra/Basp1/Hes1/Col4a4/Lama5/Cfh/Agt/Nid1/Tfap2b	14
GO:0002483	antigen processing and presentation of endogenous peptide antigen	6/627	17/11457	0.000193039	0.00357098	0.00265988	Ulbp1/Tap2/H2-Q4/H2-K1/Tap1/H2-T23	6
GO:0019885	antigen processing and presentation of endogenous peptide antigen via MHC class I	6/627	17/11457	0.000193039	0.00357098	0.00265988	Ulbp1/Tap2/H2-Q4/H2-K1/Tap1/H2-T23	6
GO:0045823	positive regulation of heart contraction	6/627	17/11457	0.000193039	0.00357098	0.00265988	Adra1b/Rgs4/Ccn2/Rgs2/Avpr1a/Adm	6
GO:0051962	positive regulation of nervous system development	27/627	234/11457	0.000193257	0.00357098	0.00265988	Ntrk1/Musk/Clstn3/Ptn/Trf/Csf1r/Rgs14/Bdnf/Thbs2/Ptprf/Obsl1/Lrp2/Adgrl2/Flt1/Egr2/Stau2/Nrg1/Hes1/Adgrl1/Igf1/Ace/Ntn1/Wnt5a/Adgre5/Kdr/Mme/Vegfc	27
GO:0061098	positive regulation of protein tyrosine kinase activity	8/627	31/11457	0.000197463	0.0035951	0.00267784	Cass4/Abi3/Csf1r/Areg/Tgfa/Gas6/Ace/Agt	8
GO:0031099	regeneration	16/627	106/11457	0.000197493	0.0035951	0.00267784	Ptn/Scarf1/Igsf10/Hopx/Lifr/Prrx1/Bdnf/Ptprf/Nrep/Nrg1/Cdkn1a/Igf1/Ace/Nfib/Enpp1/Adm	16
GO:0048736	appendage development	19/627	139/11457	0.000198672	0.0035951	0.00267784	Itgb4/Irf6/Prrx1/Smoc1/Nfia/Osr2/Aff3/Cacna1c/Npr2/Wnt9a/Tbx2/Alx3/Rarb/Wnt5a/Enpp1/Ror2/Alx4/Fbn2/Tfap2b	19
GO:0060173	limb development	19/627	139/11457	0.000198672	0.0035951	0.00267784	Itgb4/Irf6/Prrx1/Smoc1/Nfia/Osr2/Aff3/Cacna1c/Npr2/Wnt9a/Tbx2/Alx3/Rarb/Wnt5a/Enpp1/Ror2/Alx4/Fbn2/Tfap2b	19
GO:0002697	regulation of immune effector process	26/627	222/11457	0.000198867	0.0035951	0.00267784	Crtam/Cd36/Mbl2/P2rx7/Ulbp1/Il23a/Unc13d/Casp1/Gata2/Ptpn6/Nckap1l/Arid5a/Hlx/Tap2/Serpinb9b/Cd74/Stat5b/Stat5a/H2-Q4/H2-K1/Tap1/Wnt5a/H2-T23/Ripk3/Cfh/Svep1	26
GO:0090092	regulation of transmembrane receptor protein serine/threonine kinase signaling pathway	22/627	174/11457	0.000204461	0.0036803	0.0027413	Bmp5/Acvrl1/Cav1/Chrdl1/Ltbp1/Lrp2/Slc2a10/Rasl11b/Thbs1/Htra1/Nrep/Hes1/Rbpms/Fstl3/Wnt5a/Eid2/Aspn/Kdr/Lox/Fbn2/Tfap2b/Gdf10	22
GO:0032103	positive regulation of response to external stimulus	35/627	338/11457	0.000205988	0.00369188	0.00274992	Crtam/Cd36/Mbl2/Ulbp1/Ptn/Scarf1/Il23a/Ifi213/Hspa1a/Csf1r/Casp1/Gpsm3/Pla2g7/Nr1h4/Nckap1l/Cav1/Csf1/Dab2ip/Cd74/Stat5b/Tnip3/Thbs1/Stat5a/Nrg1/Emilin2/Gas6/Ace/Optn/Lpar1/Wnt5a/Slit2/Kdr/Cebpa/Vegfc/Colec12	35
GO:0030324	lung development	20/627	151/11457	0.000210153	0.00375042	0.00279353	Dppa2/Fgf7/Hopx/Ccn2/Pdgfa/Stra6/Pdgfra/Tbx2/Hsd11b1/Hes1/Adamts2/Igf1/Ace/Lama5/Nfib/Wnt5a/Hhip/Kdr/Cebpa/Lox	20
GO:0040018	positive regulation of multicellular organism growth	7/627	24/11457	0.000217078	0.00385753	0.00287331	Foxs1/Vil1/Csf1/Ghr/Stat5b/Stat5a/Agt	7
GO:0002687	positive regulation of leukocyte migration	14/627	86/11457	0.000218262	0.00386212	0.00287673	Ptn/Il23a/Csf1r/Gpsm3/Pla2g7/Nckap1l/Csf1/Pecam1/Itgb3/Cd74/Thbs1/Gas6/Wnt5a/Vegfc	14
GO:0061041	regulation of wound healing	13/627	76/11457	0.000219237	0.00386301	0.00287739	Cd36/Kank1/Tspan8/Acta2/Tbxa2r/Vil1/Cav1/Pdgfa/C1qtnf1/Thbs1/Cd34/Pdgfra/Emilin2	13
GO:0050803	regulation of synapse structure or activity	24/627	199/11457	0.000222213	0.00389899	0.0029042	Ntrk1/Cttnbp2/Musk/Cntnap4/Clstn3/Ptn/Ngef/Rapgef4/Bdnf/Dab2ip/Thbs2/Dnm3/Ptprf/Adgrl2/Sybu/Stau2/Nrg1/Adgrl1/Ntn1/Sema3f/Lrfn3/Wnt5a/Adgre5/Ror2	24
GO:0061351	neural precursor cell proliferation	18/627	129/11457	0.000223633	0.0039075	0.00291053	Cntnap4/Ptn/Rpgrip1/Trf/Gata2/Bdnf/Nfia/Btg2/Lrp2/Rarb/Igf1/Optn/Trim71/Nfib/Wnt5a/Hhip/Rora/Vegfc	18
GO:0002699	positive regulation of immune effector process	20/627	152/11457	0.000229904	0.00398374	0.00296732	Crtam/Cd36/Mbl2/P2rx7/Ulbp1/Il23a/Unc13d/Casp1/Gata2/Ptpn6/Arid5a/Hlx/Tap2/Cd74/Stat5b/Stat5a/H2-Q4/H2-K1/Wnt5a/H2-T23	20
GO:1901888	regulation of cell junction assembly	20/627	152/11457	0.000229904	0.00398374	0.00296732	Ntrk1/Limch1/Musk/Clstn3/Acvrl1/Hopx/Cav1/Bdnf/Thbs2/Adgrl2/Stau2/Nrg1/Adgrl1/Ace/Ntn1/Lrfn3/Wnt5a/Adgre5/Kdr/Agt	20
GO:0048562	embryonic organ morphogenesis	22/627	176/11457	0.000241156	0.00416143	0.00309968	Cryaa/Gata2/Prrx1/Hlx/Mfap2/Osr2/Tcf7/Stra6/Wnt9a/Pdgfra/Tbx2/Alx3/Rarb/Tbx18/Hes1/Ntn1/Wnt5a/Aldh1a1/Cthrc1/Enpp1/Ror2/Alx4	22
GO:0031214	biomineral tissue development	16/627	108/11457	0.000246264	0.00423209	0.0031523	P2rx7/Ptn/Spp1/Csf1r/Actn3/Mtss1/Axin2/Osr2/Igf1/Gas6/Aspn/Omd/Enpp1/Notum/Lox/Fbn2	16
GO:0030323	respiratory tube development	20/627	153/11457	0.000251265	0.00430034	0.00320314	Dppa2/Fgf7/Hopx/Ccn2/Pdgfa/Stra6/Pdgfra/Tbx2/Hsd11b1/Hes1/Adamts2/Igf1/Ace/Lama5/Nfib/Wnt5a/Hhip/Kdr/Cebpa/Lox	20
GO:0048729	tissue morphogenesis	41/627	423/11457	0.000254136	0.00433173	0.00322652	Bmp5/Col4a1/Syne4/Adamts12/Mst1/Acvrl1/Fgf7/Arhgap24/Isl1/Areg/Wnt10a/Csf1/Pdgfa/Mtss1/Foxc1/Lrp2/Irx1/Flt1/Stat5a/Pdgfra/Tbx2/Nrg1/Tbx18/Hes1/Igf1/Lama5/Ntn1/Trim71/Wnt5a/Hhip/Aldh1a1/Slit2/Kdr/Cthrc1/Enpp1/Stc1/Ror2/Agt/Adm/Ar/Vegfc	41
GO:0070588	calcium ion transmembrane transport	21/627	165/11457	0.00025835	0.00438565	0.00326669	Hpca/P2rx7/Cxcl9/Atp2c2/Lck/Pkd1l1/Ptpn6/Ccn2/Cabp1/Cacng8/Cav1/Rrad/Cacna1a/Itgb3/Cacna1c/Cacna2d1/Gem/Stac2/Plcb1/Gas6/Nalcn	21
GO:0014015	positive regulation of gliogenesis	11/627	58/11457	0.000260942	0.00438712	0.00326778	Ptn/Trf/Csf1r/Lrp2/Flt1/Egr2/Nrg1/Hes1/Igf1/Ntn1/Vegfc	11
GO:1904062	regulation of monoatomic cation transmembrane transport	23/627	189/11457	0.000261519	0.00438712	0.00326778	Hpca/P2rx7/Rgs4/Cxcl9/Nos1/Ptpn6/Cabp1/Cav1/Ank3/Rrad/Fxyd5/Cacna1a/Klhl24/Itgb3/Tesc/Cacna1c/Cacna2d1/Kcnip3/Gem/Stac2/Plcb1/Cnksr3/Kcnj2	23
GO:0009410	response to xenobiotic stimulus	22/627	177/11457	0.000261588	0.00438712	0.00326778	Ntrk1/As3mt/P2rx7/Gpld1/Nos1/Cd69/Akr1c13/Lck/Akr1c12/Casp1/Nr1h4/Nckap1l/Bdnf/Gsta4/Fos/Gas6/Cyp1b1/Aldh1a1/Dpep1/Kdr/C130074G19Rik/Rora	22
GO:0032890	regulation of organic acid transport	10/627	49/11457	0.000264633	0.00442043	0.00329259	P2rx7/Rgs4/Pla2r1/Sv2a/Ptges/Ces1a/Thbs1/Rgs2/Agt/Avpr1a	10
GO:1902107	positive regulation of leukocyte differentiation	18/627	131/11457	0.000271718	0.00447054	0.00332991	Hcls1/Il23a/Lck/Csf1r/Il2rg/Nckap1l/Hlx/Csf1/Itgb3/Zfp36l1/Cd74/Stat5b/Tesc/Stat5a/Fos/Gas6/Sox12/Ror2	18
GO:1903708	positive regulation of hemopoiesis	18/627	131/11457	0.000271718	0.00447054	0.00332991	Hcls1/Il23a/Lck/Csf1r/Il2rg/Nckap1l/Hlx/Csf1/Itgb3/Zfp36l1/Cd74/Stat5b/Tesc/Stat5a/Fos/Gas6/Sox12/Ror2	18
GO:0043010	camera-type eye development	25/627	214/11457	0.000272665	0.00447054	0.00332991	Cryaa/Ptn/Col4a1/Rpgrip1/Slc4a5/Acvrl1/Casz1/Nfia/Tenm3/Foxc1/Osr2/Stra6/Cacna1c/Flt1/Pdgfra/Tbx2/Hes1/Cyp1b1/Nfib/Fjx1/Zhx2/Cfh/Aldh1a1/Kdr/Nectin3	25
GO:0009617	response to bacterium	35/627	343/11457	0.000273078	0.00447054	0.00332991	Cd36/Cxcl16/Mbl2/P2rx7/Tbxa2r/Cxcl9/Il23a/Nos1/Vil1/Bank1/Trf/Casp1/Nr1h4/Ccdc80/Cubn/Arid5a/Slc9a9/Cav1/Bcl3/Dab2ip/Tap2/Stat5b/Adgrl2/Tnip3/Emilin2/H2-K1/Ace/Optn/Nfib/Ptgfr/Wnt5a/Cfh/Enpp1/Adm/Colec12	35
GO:1903524	positive regulation of blood circulation	6/627	18/11457	0.000276245	0.00447054	0.00332991	Adra1b/Rgs4/Ccn2/Rgs2/Avpr1a/Adm	6
GO:0002476	antigen processing and presentation of endogenous peptide antigen via MHC class Ib	5/627	12/11457	0.000277267	0.00447054	0.00332991	Ulbp1/Tap2/H2-Q4/H2-K1/H2-T23	5
GO:0002484	antigen processing and presentation of endogenous peptide antigen via MHC class I via ER pathway	5/627	12/11457	0.000277267	0.00447054	0.00332991	Ulbp1/Tap2/H2-Q4/H2-K1/H2-T23	5
GO:0046629	gamma-delta T cell activation	5/627	12/11457	0.000277267	0.00447054	0.00332991	Lck/Nckap1l/Tcf7/Stat5b/Stat5a	5
GO:2001212	regulation of vasculogenesis	5/627	12/11457	0.000277267	0.00447054	0.00332991	Asb4/Ramp2/Cd34/Kdr/Adm	5
GO:0048568	embryonic organ development	32/627	304/11457	0.000284595	0.00454615	0.00338623	Bmp5/Cryaa/Col18a1/Gata2/Prrx1/Prickle2/Hlx/Pdgfa/Mfap2/Pbx3/Foxc1/Zfp36l1/Osr2/Tcf7/Stra6/Wnt9a/Pdgfra/Tbx2/Alx3/Rarb/Tbx18/Hes1/Ntn1/Wnt5a/Aldh1a1/Kdr/Cthrc1/Enpp1/Ror2/Alx4/Cebpa/Adm	32
GO:0001819	positive regulation of cytokine production	31/627	291/11457	0.000285897	0.00454615	0.00338623	Crtam/Cd36/Hc/P2rx7/Ulbp1/Pla2r1/Batf/Il23a/Ifi213/Hspa1a/Csf1r/Casp1/Gpsm3/Nr1h4/Arid5a/Isl1/Bcl3/Akap12/Cd74/Stat5b/Thbs1/Cd34/Stat5a/Plcb1/Optn/Cyp1b1/Wnt5a/Postn/Rora/Agt/Lum	31
GO:0035136	forelimb morphogenesis	7/627	25/11457	0.0002874	0.00454615	0.00338623	Osr2/Cacna1c/Wnt9a/Alx3/Enpp1/Alx4/Tfap2b	7
GO:0048483	autonomic nervous system development	7/627	25/11457	0.0002874	0.00454615	0.00338623	Ntrk1/Hlx/Ackr3/Egr2/Hes1/Sema3f/Tfap2b	7
GO:0050819	negative regulation of coagulation	7/627	25/11457	0.0002874	0.00454615	0.00338623	Tspan8/Procr/Pdgfa/C1qtnf1/Thbs1/Cd34/Pdgfra	7
GO:0007548	sex differentiation	21/627	167/11457	0.000305312	0.00481126	0.0035837	Ntrk1/Bmp5/Afp/Amhr2/Serpinb6b/Fgf7/Foxc1/Lrp2/Tcf7/Stat5b/Tesc/Stra6/Npr2/Stat5a/Pdgfra/Ace/Wnt5a/Kdr/Ror2/Agt/Ar	21
GO:0001817	regulation of cytokine production	44/627	469/11457	0.000313274	0.00491817	0.00366334	Crtam/Cd36/Hc/Nlrp12/P2rx7/Ulbp1/Sigirr/Pla2r1/Batf/Il23a/Ifi213/Hspa1a/Bank1/Csf1r/Casp1/Gpsm3/Ptpn6/Nr1h4/Nckap1l/Arid5a/Isl1/Ltbp1/Bcl3/Akap12/Cd74/Stat5b/Flt1/Slc2a10/Thbs1/Cd34/Stat5a/Mc1r/Plcb1/Igf1/Gas6/Optn/Cyp1b1/Wnt5a/Ripk3/Postn/Fbln1/Rora/Agt/Lum	44
GO:0048663	neuron fate commitment	8/627	33/11457	0.000315395	0.00493292	0.00367432	Gata2/Casz1/Prrx1/Isl1/Nfia/Nrg1/Nfib/Zfp521	8
GO:0014066	regulation of phosphatidylinositol 3-kinase signaling	12/627	69/11457	0.000324034	0.00504912	0.00376088	Ntrk1/Hcls1/Musk/Ptpn6/Pdgfa/Dab2ip/Flt1/Dcn/Igf1/Kdr/Ror2/Agt	12
GO:0051960	regulation of nervous system development	36/627	360/11457	0.000331593	0.00514771	0.00383431	Ntrk1/Musk/Clstn3/Ptn/Nos1/Trf/Csf1r/Gata2/Rgs14/Casz1/Bdnf/Thbs2/Ptprf/Obsl1/Btg2/Lrp2/Adgrl2/Flt1/Sema4g/Egr2/Daam2/Rarb/Stau2/Nrg1/Hes1/Adgrl1/Igf1/Ace/Ntn1/Sema3f/Wnt5a/Adgre5/Slit2/Kdr/Mme/Vegfc	36
GO:0001776	leukocyte homeostasis	14/627	90/11457	0.000355252	0.00547911	0.00408115	Dock10/Hc/P2rx7/Tnfsf13b/Csf1r/Nckap1l/Csf1/Slc40a1/Cd74/Stat5b/Stat5a/Ripk3/Cfh/Enpp1	14
GO:0060291	long-term synaptic potentiation	11/627	60/11457	0.000355565	0.00547911	0.00408115	Musk/Snap25/Ptn/Prrt1/Nos1/Rgs14/Zdhhc2/Igsf11/Nsg1/Enpp1/Mme	11
GO:0010721	negative regulation of cell development	22/627	181/11457	0.000359344	0.00551699	0.00410937	Ptn/Lrrc17/Gata2/Casz1/Bdnf/Hlx/Btg2/Zfp608/Cd74/Npr2/Sema4g/Daam2/Hes1/Fstl3/Igf1/Ntn1/Sema3f/Wnt5a/Hmgb3/Slit2/Grb14/Cebpa	22
GO:0043491	protein kinase B signaling	18/627	134/11457	0.000360675	0.00551715	0.00410949	Ntrk1/Hcls1/Cass4/Bank1/Cavin3/Pdgfa/Lrp2/Zfp36l1/C1qtnf1/Thbs1/Mc1r/Nrg1/Igf1/Gas6/Mmp3/Sesn3/Kdr/Lox	18
GO:0098657	import into cell	17/627	123/11457	0.000371576	0.00564911	0.00420778	Cd36/Rgs4/Nos1/Neurl3/Cubn/Slc9a9/Cav1/Cacna1a/Itgb3/Lrp2/Stra6/Cacna1c/Slc2a10/Thbs1/Rgs2/Kcnj2/Agt	17
GO:0042476	odontogenesis	12/627	70/11457	0.000372008	0.00564911	0.00420778	Wnt10a/Csf1/Foxc1/Axin2/Lamb1/Osr2/Cd34/Pdgfra/Apcdd1/Lama5/Aspn/Enpp1	12
GO:0050890	cognition	23/627	194/11457	0.000382723	0.00578133	0.00430627	Ntrk1/Ccnd2/Musk/Snap25/Adra1b/Ptn/Prrt1/Pde8b/Casp1/Rgs14/Bdnf/Btg2/Lamb1/Stra6/Cacna1c/Plcb1/Nrg1/Peg13/Synpo/Igf1/Rcan2/Mme/Agt	23
GO:0010758	regulation of macrophage chemotaxis	6/627	19/11457	0.000385199	0.00578133	0.00430627	Hc/Mst1/Csf1r/Mmp28/Csf1/Thbs1	6
GO:0019883	antigen processing and presentation of endogenous antigen	6/627	19/11457	0.000385199	0.00578133	0.00430627	Ulbp1/Tap2/H2-Q4/H2-K1/Tap1/H2-T23	6
GO:0048705	skeletal system morphogenesis	20/627	158/11457	0.000386253	0.00578133	0.00430627	P2rx7/Ccn2/Prrx1/Actn3/Foxc1/Axin2/Osr2/Npr2/Thbs1/Wnt9a/Pdgfra/Alx3/Rarb/Hhip/Enpp1/Stc1/Ror2/Alx4/Sp5/Fbn2	20
GO:0098900	regulation of action potential	8/627	34/11457	0.000392926	0.00583936	0.00434949	Cd36/Rapgef4/Cav1/Ank3/Cacna1c/Cacna2d1/Tbx18/Kcnj2	8
GO:1905330	regulation of morphogenesis of an epithelium	8/627	34/11457	0.000392926	0.00583936	0.00434949	Adamts12/Fgf7/Pdgfa/Pdgfra/Tbx2/Wnt5a/Agt/Ar	8
GO:0071772	response to BMP	15/627	102/11457	0.000413681	0.00610436	0.00454688	Amhr2/Adamts12/Acvrl1/Cav1/Chrdl1/Nfia/Lrp2/Htra1/Hes1/Fstl3/Wnt5a/Kdr/Ror2/Tfap2b/Gdf10	15
GO:0071773	cellular response to BMP stimulus	15/627	102/11457	0.000413681	0.00610436	0.00454688	Amhr2/Adamts12/Acvrl1/Cav1/Chrdl1/Nfia/Lrp2/Htra1/Hes1/Fstl3/Wnt5a/Kdr/Ror2/Tfap2b/Gdf10	15
GO:0002428	antigen processing and presentation of peptide antigen via MHC class Ib	5/627	13/11457	0.000430355	0.00628379	0.00468053	Ulbp1/Tap2/H2-Q4/H2-K1/H2-T23	5
GO:0044062	regulation of excretion	5/627	13/11457	0.000430355	0.00628379	0.00468053	Ace/Anpep/Stc1/Agt/Avpr1a	5
GO:1902307	positive regulation of sodium ion transmembrane transport	5/627	13/11457	0.000430355	0.00628379	0.00468053	Nos1/Ank3/Tesc/Plcb1/Cnksr3	5
GO:0042509	regulation of tyrosine phosphorylation of STAT protein	9/627	43/11457	0.000438432	0.00637942	0.00475176	Hcls1/Il23a/Lck/Csf1r/Isl1/Cav1/Pecam1/Hes1/Igf1	9
GO:0050807	regulation of synapse organization	23/627	196/11457	0.000443546	0.00643141	0.00479049	Ntrk1/Cttnbp2/Musk/Cntnap4/Clstn3/Ptn/Ngef/Rapgef4/Bdnf/Dab2ip/Thbs2/Dnm3/Ptprf/Adgrl2/Stau2/Nrg1/Adgrl1/Ntn1/Sema3f/Lrfn3/Wnt5a/Adgre5/Ror2	23
GO:0030183	B cell differentiation	14/627	92/11457	0.000447712	0.00646935	0.00481875	Ntrk1/Gimap1/Dock10/Tnfsf13b/Ptpn6/Il2rg/Nckap1l/Mfng/Bcl3/Zfp36l1/Stat5b/Stat5a/Hmgb3/Enpp1	14
GO:0060541	respiratory system development	21/627	172/11457	0.000456792	0.00657781	0.00489953	Ano1/Dppa2/Fgf7/Hopx/Ccn2/Pdgfa/Stra6/Pdgfra/Tbx2/Hsd11b1/Hes1/Adamts2/Igf1/Ace/Lama5/Nfib/Wnt5a/Hhip/Kdr/Cebpa/Lox	21
GO:0007507	heart development	41/627	436/11457	0.000475696	0.00682648	0.00508475	Ccnd2/Bmp5/Adra1b/Rgs4/Nrap/Cavin4/Acvrl1/Hopx/Pkd1l1/Isl1/Adam19/Ltbp1/Pdlim1/Ramp2/Foxc1/Axin2/Lrp2/Zfp36l1/Stra6/Cacna1c/Thbs1/Pdgfra/Tbx2/Rgs2/Slit3/Pdlim4/Rarb/Nrg1/Tbx18/Cdkn1a/Hes1/Igf1/Bicc1/Ace/Wnt5a/Slit2/Kdr/Enpp1/Agt/Lox/Adm	41
GO:1901385	regulation of voltage-gated calcium channel activity	7/627	27/11457	0.000482504	0.00690046	0.00513986	Hpca/Cabp1/Rrad/Cacna1a/Cacna2d1/Gem/Stac2	7
GO:0002694	regulation of leukocyte activation	35/627	355/11457	0.000519786	0.00740728	0.00551737	Crtam/Rasal3/Ulbp1/Adgrf5/Tnfsf13b/Milr1/Il23a/Unc13d/Duxbl1/Lck/Bank1/Csf1r/Gata2/Ptpn6/Il2rg/Nckap1l/Cav1/Hlx/Zfp608/Zfp36l1/Cd74/Tcf7/Stat5b/Thbs1/Stat5a/Cdkn1a/Hes1/Igf1/Gas6/Sox12/Wnt5a/Ripk3/Hmgb3/Rora/Cebpa	35
GO:0001945	lymph vessel development	6/627	20/11457	0.000525037	0.00740728	0.00551737	Acvrl1/Foxc1/Npr2/Kdr/Svep1/Vegfc	6
GO:0038083	peptidyl-tyrosine autophosphorylation	6/627	20/11457	0.000525037	0.00740728	0.00551737	Ntrk1/Lck/Cav1/Nrg1/Ace/Kdr	6
GO:0098801	regulation of renal system process	6/627	20/11457	0.000525037	0.00740728	0.00551737	Gas6/Ace/Anpep/Stc1/Agt/Avpr1a	6
GO:0001938	positive regulation of endothelial cell proliferation	11/627	63/11457	0.000550457	0.00773976	0.00576502	Acvrl1/Fgf7/Col18a1/Gata2/Cav1/Itgb3/Stat5a/Igf1/Wnt5a/Kdr/Vegfc	11
GO:0050778	positive regulation of immune response	37/627	384/11457	0.000563603	0.007898	0.00588289	Crtam/Cd36/Mbl2/Hc/P2rx7/Ulbp1/Fyb/Tnfsf13b/Il23a/Gpld1/Ifi213/Kcnn4/Hspa1a/Myo1g/Lpxn/Lck/Casp1/Gata2/Ptpn6/Nr1h4/Nckap1l/Arid5a/Cav1/Hlx/Dab2ip/Tap2/Cd74/Stat5b/Tnip3/Stat5a/H2-Q4/H2-K1/Wnt5a/H2-T23/Cfh/Svep1/Colec12	37
GO:0042063	gliogenesis	26/627	238/11457	0.000591574	0.00826225	0.0061542	Ptn/Ano1/Trf/Csf1r/Itgb4/Casz1/Areg/Csf1/Dab2ip/Nfia/Plpp3/Lrp2/Lamb1/Flt1/Egr2/Daam2/Nrg1/Apcdd1/Hes1/Igf1/Ntn1/Nfib/Enpp1/Ror2/Agt/Vegfc	26
GO:0014909	smooth muscle cell migration	13/627	84/11457	0.000601158	0.00835363	0.00622227	Rapgef4/Cav1/Pdgfa/Itgb3/Stat5b/Igf1/Ace/Lpar1/Cyp1b1/Postn/Slit2/Enpp1/Agt	13
GO:0002709	regulation of T cell mediated immunity	10/627	54/11457	0.000602117	0.00835363	0.00622227	P2rx7/Ulbp1/Il23a/Nckap1l/Arid5a/Tap2/H2-Q4/H2-K1/H2-T23/Ripk3	10
GO:0010876	lipid localization	31/627	304/11457	0.000608301	0.00841147	0.00626535	Cd36/Abca16/Slc27a6/Atp9a/P2rx7/Atp8b4/Mexis/Soat2/Pla2r1/Kcnn4/Spp1/Osbpl6/Nr1h4/Cav1/Pitpnc1/Itgb3/C1qtnf1/Ptges/Ces1a/Stat5b/Stra6/Bdkrb2/Thbs1/Stat5a/Nrg1/Ace/Slco3a1/Pctp/Enpp1/Agt/Crabp1	31
GO:0061337	cardiac conduction	7/627	28/11457	0.000613334	0.00844643	0.00629139	Isl1/Cav1/Cacna1c/Cacna2d1/Tbx18/Kcnj2/Agt	7
GO:0035107	appendage morphogenesis	16/627	117/11457	0.000616897	0.00844643	0.00629139	Prrx1/Nfia/Osr2/Aff3/Cacna1c/Npr2/Wnt9a/Tbx2/Alx3/Rarb/Wnt5a/Enpp1/Ror2/Alx4/Fbn2/Tfap2b	16
GO:0035108	limb morphogenesis	16/627	117/11457	0.000616897	0.00844643	0.00629139	Prrx1/Nfia/Osr2/Aff3/Cacna1c/Npr2/Wnt9a/Tbx2/Alx3/Rarb/Wnt5a/Enpp1/Ror2/Alx4/Fbn2/Tfap2b	16
GO:0002456	T cell mediated immunity	12/627	74/11457	0.000628385	0.00857561	0.00638761	P2rx7/Ulbp1/Il23a/Myo1g/Nckap1l/Arid5a/Tap2/Serpinb9b/H2-Q4/H2-K1/H2-T23/Ripk3	12
GO:0006869	lipid transport	28/627	265/11457	0.000631983	0.00859661	0.00640325	Cd36/Abca16/Slc27a6/Atp9a/P2rx7/Atp8b4/Mexis/Soat2/Pla2r1/Kcnn4/Spp1/Osbpl6/Nr1h4/Cav1/Pitpnc1/Itgb3/C1qtnf1/Ptges/Ces1a/Stra6/Bdkrb2/Thbs1/Nrg1/Ace/Slco3a1/Pctp/Agt/Crabp1	28
GO:0010092	specification of animal organ identity	5/627	14/11457	0.000639463	0.00864206	0.00643711	Isl1/Axin2/Lrp2/Wnt5a/Ar	5
GO:0048566	embryonic digestive tract development	5/627	14/11457	0.000639463	0.00864206	0.00643711	Hlx/Tcf7/Stra6/Pdgfra/Rarb	5
GO:0061138	morphogenesis of a branching epithelium	17/627	129/11457	0.000651173	0.00877193	0.00653384	Col4a1/Fgf7/Areg/Csf1/Pdgfa/Flt1/Pdgfra/Tbx2/Igf1/Lama5/Wnt5a/Hhip/Slit2/Kdr/Agt/Adm/Ar	17
GO:0001936	regulation of endothelial cell proliferation	13/627	85/11457	0.000674999	0.00906365	0.00675113	Acvrl1/Fgf7/Col18a1/Gata2/Cav1/Itgb3/Flt1/Thbs1/Stat5a/Igf1/Wnt5a/Kdr/Vegfc	13
GO:0045927	positive regulation of growth	24/627	215/11457	0.000697611	0.00933726	0.00695493	Ccnd2/Cxcl16/Musk/Foxs1/Cryaa/Syt1/Vil1/Hopx/Actn3/Bdnf/Hlx/Csf1/Rnf157/Ghr/Stat5b/Stat5a/Tbx2/Plcb1/Nrg1/Igf1/Ntn1/Wnt5a/Agt/Avpr1a	24
GO:0046427	positive regulation of receptor signaling pathway via JAK-STAT	6/627	21/11457	0.000701364	0.0093575	0.00697001	Il23a/Ghr/Stra6/Hes1/Cyp1b1/Agt	6
GO:0045860	positive regulation of protein kinase activity	27/627	254/11457	0.0007155	0.00951271	0.00708562	Ccnd2/P2rx7/Il23a/Cass4/Abi3/Csf1r/Areg/Csf1/Pdgfa/Dab2ip/Itgb3/Axin2/Ghr/Flt1/Thbs1/Nrg1/Tgfa/Cdkn1a/Tpd52l1/Igf1/Gas6/Ace/Wnt5a/Ripk3/Ror2/Agt/Vegfc	27
GO:1903131	mononuclear cell differentiation	31/627	307/11457	0.000717553	0.00951271	0.00708562	Crtam/Ntrk1/Gimap1/Dock10/Tnfsf13b/Batf/Il23a/Ifi213/Duxbl1/Lck/Batf2/Ptpn6/Il2rg/Nckap1l/Mfng/Bcl3/Nfil3/Hlx/Csf1/Zfp608/Zfp36l1/Cd74/Tcf7/Stat5b/Stat5a/Gas6/Sox12/Ripk3/Hmgb3/Enpp1/Rora	31
GO:0035725	sodium ion transmembrane transport	11/627	65/11457	0.000724528	0.00957478	0.00713185	Nos1/Slc9a9/Ank3/Fxyd5/Klhl24/Tesc/Plcb1/Cnksr3/Nalcn/Slc6a15/Scn8a	11
GO:0007260	tyrosine phosphorylation of STAT protein	9/627	46/11457	0.000739707	0.00974453	0.00725829	Hcls1/Il23a/Lck/Csf1r/Isl1/Cav1/Pecam1/Hes1/Igf1	9
GO:0070374	positive regulation of ERK1 and ERK2 cascade	16/627	119/11457	0.00074507	0.00978431	0.00728792	Cd36/Acta2/Csf1r/Ccn2/Akap12/Cavin3/Ackr3/Pdgfa/Itgb3/Cd74/Pdgfra/Nrg1/Igf1/Gas6/Necab2/Kdr	16
GO:0010464	regulation of mesenchymal cell proliferation	7/627	29/11457	0.000770813	0.0100475	0.00748394	Ptn/Prrx1/Pdgfa/Tbx18/Nfib/Wnt5a/Kdr	7
GO:2000351	regulation of endothelial cell apoptotic process	7/627	29/11457	0.000770813	0.0100475	0.00748394	Col18a1/Gata2/Ecscr/Ramp2/Thbs1/Gas6/Kdr	7
GO:0001935	endothelial cell proliferation	14/627	97/11457	0.00077259	0.0100475	0.00748394	Acvrl1/Fgf7/Col18a1/Gata2/Cav1/Itgb3/Flt1/Thbs1/Cd34/Stat5a/Igf1/Wnt5a/Kdr/Vegfc	14
GO:0042692	muscle cell differentiation	30/627	295/11457	0.000774733	0.0100475	0.00748394	Ccnd2/Adra1b/Rgs4/Nrap/Cxcl9/Cavin4/Hopx/Csf1r/Casp1/Isl1/Actn3/Bdnf/Plpp7/Ramp2/Lamb1/Pdgfra/Tbx2/Rgs2/Rarb/Nrg1/Tbx18/Hes1/Igf1/Cfh/Adamts15/Rora/Agt/Lox/Adm/Nid1	30
GO:0014910	regulation of smooth muscle cell migration	12/627	76/11457	0.000804008	0.0103949	0.00774269	Rapgef4/Cav1/Pdgfa/Itgb3/Stat5b/Igf1/Ace/Lpar1/Cyp1b1/Postn/Slit2/Agt	12
GO:0006939	smooth muscle contraction	10/627	56/11457	0.000811852	0.0103997	0.00774628	Acta2/Tbxa2r/Lck/Cav1/Cacna1c/Bdkrb2/Flt1/Tbx2/Rgs2/Agt	10
GO:0015908	fatty acid transport	10/627	56/11457	0.000811852	0.0103997	0.00774628	Cd36/Slc27a6/P2rx7/Pla2r1/Ptges/Bdkrb2/Thbs1/Ace/Slco3a1/Crabp1	10
GO:0061097	regulation of protein tyrosine kinase activity	10/627	56/11457	0.000811852	0.0103997	0.00774628	Cass4/Abi3/Csf1r/Areg/Cav1/Itgb3/Tgfa/Gas6/Ace/Agt	10
GO:0007229	integrin-mediated signaling pathway	11/627	66/11457	0.000827382	0.0104701	0.00779876	Ptn/Fyb/Itgb4/Ccn2/Itgb3/Plpp3/Lamb1/Slc2a10/Lama5/Itgbl1/Nid1	11
GO:0032609	type II interferon production	11/627	66/11457	0.000827382	0.0104701	0.00779876	Crtam/Ulbp1/Il23a/Nr1h4/Arid5a/Isl1/Bcl3/Gas6/Wnt5a/Ripk3/Enpp1	11
GO:2000027	regulation of animal organ morphogenesis	11/627	66/11457	0.000827382	0.0104701	0.00779876	Fgf7/Wnt10a/Csf1/Pdgfa/Cd34/Apcdd1/Wnt5a/Cthrc1/Ror2/Agt/Ar	11
GO:2000177	regulation of neural precursor cell proliferation	11/627	66/11457	0.000827382	0.0104701	0.00779876	Ptn/Trf/Gata2/Bdnf/Btg2/Lrp2/Igf1/Optn/Trim71/Wnt5a/Vegfc	11
GO:0030509	BMP signaling pathway	14/627	98/11457	0.000857139	0.0108139	0.00805484	Amhr2/Acvrl1/Cav1/Chrdl1/Nfia/Lrp2/Htra1/Hes1/Fstl3/Wnt5a/Kdr/Ror2/Tfap2b/Gdf10	14
GO:0060562	epithelial tube morphogenesis	26/627	244/11457	0.000860074	0.0108183	0.00805808	Bmp5/Col4a1/Adamts12/Mst1/Acvrl1/Areg/Csf1/Mtss1/Lrp2/Irx1/Flt1/Pdgfra/Tbx2/Hes1/Igf1/Lama5/Ntn1/Trim71/Wnt5a/Hhip/Slit2/Kdr/Cthrc1/Agt/Adm/Ar	26
GO:0030099	myeloid cell differentiation	31/627	311/11457	0.000889844	0.0111591	0.00831196	Trim10/Hcls1/Adgrf5/Batf/Il23a/Ifi213/Lrrc17/Hspa1a/Trf/Csf1r/Batf2/Gata2/Ptpn6/Nckap1l/Csf1/Mfap2/Itgb3/Zfp36l1/Cd74/Prxl2a/Stat5b/Tesc/Stat5a/Fos/Plcb1/Fstl3/Hmgb3/Enpp1/Ror2/Cebpa/Lox	31
GO:0003044	regulation of systemic arterial blood pressure mediated by a chemical signal	5/627	15/11457	0.000916301	0.0114565	0.00853347	Adra1b/Adra1d/Ace/Agt/Avpr1a	5
GO:0032680	regulation of tumor necrosis factor production	15/627	110/11457	0.000930805	0.0115931	0.00863524	Cd36/Il23a/Csf1r/Ptpn6/Nr1h4/Arid5a/Isl1/Bcl3/Akap12/Thbs1/Cd34/Mc1r/Igf1/Gas6/Wnt5a	15
GO:0043068	positive regulation of programmed cell death	41/627	451/11457	0.000933242	0.0115931	0.00863524	Ntrk1/Musk/P2rx7/Ptn/Ctsk/Pla2r1/Gpld1/Mst1/Lck/Col18a1/Casp1/Cav1/Ecscr/Akap12/Dab2ip/Ptprf/Fbxo32/Bmf/Trp53inp1/Olfm1/Thbs1/Timp3/Grik2/Htra1/Rarb/Emilin2/Cdkn1a/Tpd52l1/Fap/Ace/Optn/Lpar1/Cyp1b1/Prdm11/Wnt5a/Ripk3/Aldh1a1/Slit2/Agt/Adm/Tfap2b	41
GO:0002708	positive regulation of lymphocyte mediated immunity	11/627	67/11457	0.000942046	0.0115931	0.00863524	Crtam/P2rx7/Ulbp1/Il23a/Arid5a/Tap2/Stat5b/Stat5a/H2-Q4/H2-K1/H2-T23	11
GO:0016525	negative regulation of angiogenesis	11/627	67/11457	0.000942046	0.0115931	0.00863524	Ptn/Ecscr/Dab2ip/Thbs2/Foxc1/Flt1/Thbs1/Fbln5/Dcn/Hhip/Agt	11
GO:0070167	regulation of biomineral tissue development	11/627	67/11457	0.000942046	0.0115931	0.00863524	P2rx7/Ptn/Csf1r/Actn3/Osr2/Gas6/Aspn/Omd/Enpp1/Notum/Fbn2	11
GO:0014013	regulation of gliogenesis	13/627	88/11457	0.000943886	0.0115931	0.00863524	Ptn/Trf/Csf1r/Casz1/Lrp2/Flt1/Egr2/Daam2/Nrg1/Hes1/Igf1/Ntn1/Vegfc	13
GO:0001959	regulation of cytokine-mediated signaling pathway	14/627	99/11457	0.000949357	0.0116261	0.00865983	Sigirr/Hspa1a/Casp1/Nr1h4/Cav1/Csf1/Crebrf/Ptprf/Cd74/Slit3/Gas6/Wnt5a/Slit2/Ccdc3	14
GO:0038084	vascular endothelial growth factor signaling pathway	7/627	30/11457	0.0009586	0.0116709	0.00869315	Dab2ip/Foxc1/Pdgfra/Dcn/Ptp4a3/Kdr/Vegfc	7
GO:0060042	retina morphogenesis in camera-type eye	7/627	30/11457	0.0009586	0.0116709	0.00869315	Ptn/Rpgrip1/Casz1/Fjx1/Zhx2/Cfh/Nectin3	7
GO:0060537	muscle tissue development	30/627	300/11457	0.00101696	0.0123324	0.00918586	Ccnd2/Bmp5/Adra1b/Rgs4/Nrap/Cavin4/Isl1/Actn3/Cav1/Bdnf/Hlx/Foxc1/Btg2/Lrp2/Stra6/Npr2/Pdgfra/Tbx2/Egr2/Fos/Rgs2/Rarb/Nrg1/Tbx18/Igf1/Wnt5a/Hlf/Agt/Lox/Tfap2b	30
GO:1904064	positive regulation of cation transmembrane transport	12/627	78/11457	0.00101884	0.0123324	0.00918586	P2rx7/Cxcl9/Nos1/Cav1/Ank3/Tesc/Cacna1c/Cacna2d1/Stac2/Plcb1/Cnksr3/Kcnj2	12
GO:1901343	negative regulation of vasculature development	11/627	68/11457	0.00106954	0.0128646	0.00958228	Ptn/Ecscr/Dab2ip/Thbs2/Foxc1/Flt1/Thbs1/Fbln5/Dcn/Hhip/Agt	11
GO:2000181	negative regulation of blood vessel morphogenesis	11/627	68/11457	0.00106954	0.0128646	0.00958228	Ptn/Ecscr/Dab2ip/Thbs2/Foxc1/Flt1/Thbs1/Fbln5/Dcn/Hhip/Agt	11
GO:0035282	segmentation	10/627	58/11457	0.00107821	0.0128646	0.00958228	Ifitm1/Foxc1/Axin2/Irx1/Egr2/Tbx18/Lama5/Sema3f/Wnt5a/Ror2	10
GO:0061180	mammary gland epithelium development	10/627	58/11457	0.00107821	0.0128646	0.00958228	Atp2c2/Mst1/Irf6/Areg/Csf1/Stat5a/Ntn1/Wnt5a/Slit2/Ar	10
GO:0071774	response to fibroblast growth factor	10/627	58/11457	0.00107821	0.0128646	0.00958228	Fgf7/Ccn2/Zfp36l1/Npr2/Thbs1/Tbx2/Trim71/Wnt5a/Hhip/Enpp1	10
GO:0022409	positive regulation of cell-cell adhesion	21/627	184/11457	0.00111018	0.0132083	0.0098383	Rasal3/Tnfsf13b/Il23a/Lck/Il2rg/Nckap1l/Cav1/Adam19/Ank3/Hlx/Plpp3/Cd74/Stat5b/Stat5a/Tbx18/Emilin2/Hes1/Fstl3/Igf1/Sox12/Wnt5a	21
GO:1903555	regulation of tumor necrosis factor superfamily cytokine production	15/627	112/11457	0.00112342	0.0133278	0.00992735	Cd36/Il23a/Csf1r/Ptpn6/Nr1h4/Arid5a/Isl1/Bcl3/Akap12/Thbs1/Cd34/Mc1r/Igf1/Gas6/Wnt5a	15
GO:0007389	pattern specification process	27/627	262/11457	0.00114484	0.0135169	0.0100682	Bmp5/Ifitm1/Acvrl1/Pkd1l1/Mfng/Isl1/Chrdl1/Foxc1/Axin2/Btg2/Lrp2/Irx1/Tbx2/Alx3/Egr2/Daam2/Tbx18/Hes1/Bicc1/Lama5/Sema3f/Wnt5a/Hhip/Stc1/Ror2/Alx4/Ar	27
GO:0090066	regulation of anatomical structure size	35/627	371/11457	0.00114583	0.0135169	0.0100682	Kank1/Hcls1/Pclo/Adra1b/Acta2/P2rx7/Tbxa2r/Nos1/Kcnn4/Vil1/Add2/Nckap1l/Cav1/Bdnf/Pecam1/Foxc1/Faah/Cacna1c/Olfm1/Bdkrb2/Sema4g/Npr3/Daam2/Rgs2/Adra1d/Prr16/Ace/Ntn1/Sema3f/Wnt5a/Slit2/Kdr/Agt/Avpr1a/Adm	35
GO:0060603	mammary gland duct morphogenesis	7/627	31/11457	0.0011806	0.0137457	0.0102386	Mst1/Areg/Csf1/Ntn1/Wnt5a/Slit2/Ar	7
GO:0071622	regulation of granulocyte chemotaxis	7/627	31/11457	0.0011806	0.0137457	0.0102386	Il23a/Csf1r/Nckap1l/Csf1/Cd74/Thbs1/Slit2	7
GO:0072577	endothelial cell apoptotic process	7/627	31/11457	0.0011806	0.0137457	0.0102386	Col18a1/Gata2/Ecscr/Ramp2/Thbs1/Gas6/Kdr	7
GO:0003416	endochondral bone growth	6/627	23/11457	0.00118808	0.0137457	0.0102386	Bnc2/Npr2/Thbs1/Rarb/Kdr/Stc1	6
GO:0045933	positive regulation of muscle contraction	6/627	23/11457	0.00118808	0.0137457	0.0102386	Tbxa2r/Lck/Ccn2/Actn3/Cacna2d1/Rgs2	6
GO:0048048	embryonic eye morphogenesis	6/627	23/11457	0.00118808	0.0137457	0.0102386	Cryaa/Mfap2/Stra6/Tbx2/Rarb/Aldh1a1	6
GO:0030098	lymphocyte differentiation	28/627	276/11457	0.00118899	0.0137457	0.0102386	Crtam/Ntrk1/Gimap1/Dock10/Tnfsf13b/Batf/Il23a/Duxbl1/Lck/Ptpn6/Il2rg/Nckap1l/Mfng/Bcl3/Nfil3/Hlx/Zfp608/Zfp36l1/Cd74/Tcf7/Stat5b/Stat5a/Gas6/Sox12/Ripk3/Hmgb3/Enpp1/Rora	28
GO:0021675	nerve development	9/627	49/11457	0.00119156	0.0137457	0.0102386	Ntrk1/Isl1/Bdnf/Ackr3/Npr2/Egr2/Hes1/Col25a1/Sema3f	9
GO:0032649	regulation of type II interferon production	10/627	59/11457	0.00123597	0.0142085	0.0105833	Crtam/Ulbp1/Il23a/Nr1h4/Arid5a/Isl1/Bcl3/Gas6/Wnt5a/Ripk3	10
GO:0002711	positive regulation of T cell mediated immunity	8/627	40/11457	0.00124529	0.0142085	0.0105833	P2rx7/Ulbp1/Il23a/Arid5a/Tap2/H2-Q4/H2-K1/H2-T23	8
GO:0030225	macrophage differentiation	8/627	40/11457	0.00124529	0.0142085	0.0105833	Hcls1/Csf1r/Gata2/Csf1/Plcb1/Enpp1/Ror2/Cebpa	8
GO:1905517	macrophage migration	8/627	40/11457	0.00124529	0.0142085	0.0105833	Hc/Mst1/Csf1r/Mmp28/Csf1/Thbs1/Enpp1/Ror2	8
GO:0002475	antigen processing and presentation via MHC class Ib	5/627	16/11457	0.00127329	0.0144395	0.0107553	Ulbp1/Tap2/H2-Q4/H2-K1/H2-T23	5
GO:0048608	reproductive structure development	21/627	186/11457	0.00127445	0.0144395	0.0107553	Ntrk1/Bmp5/Afp/Serpinb6b/Fgf7/Foxc1/Lrp2/Tcf7/Stat5b/Tesc/Stra6/Npr2/Stat5a/Pdgfra/Igf1/Ace/Wnt5a/Kdr/Ror2/Agt/Ar	21
GO:0010811	positive regulation of cell-substrate adhesion	14/627	102/11457	0.00127756	0.0144395	0.0107553	Cd36/Epha1/Ptn/Cass4/Unc13d/Spp1/Ccdc80/Smoc1/Csf1/Itgb3/Thbs1/Fbln1/Kdr/Nid1	14
GO:0002062	chondrocyte differentiation	12/627	80/11457	0.00127936	0.0144395	0.0107553	Gpld1/Adamts12/Ccn2/Arid5a/Axin2/Osr2/Npr2/Wnt9a/Rarb/Nfib/Mboat2/Ror2	12
GO:0006954	inflammatory response	37/627	402/11457	0.00131033	0.0147492	0.010986	Hc/Nlrp12/P2rx7/Ptn/Tbxa2r/Sigirr/Cxcl9/Il23a/Adamts12/Unc13d/Elf3/Csf1r/Casp1/Gpsm3/Pla2g7/Nr1h4/Isl1/Csf1/Dab2ip/Ptges/Stat5b/Bdkrb2/Thbs1/Stat5a/Igf1/Ace/Ggt5/Chst1/Ptgfr/Wnt5a/Cfh/Dpep1/Slit2/Enpp1/Rora/Cebpa/Agt	37
GO:0051896	regulation of protein kinase B signaling	15/627	114/11457	0.00134858	0.0151389	0.0112763	Ntrk1/Hcls1/Cass4/Bank1/Cavin3/Pdgfa/Lrp2/C1qtnf1/Thbs1/Mc1r/Nrg1/Igf1/Gas6/Mmp3/Sesn3	15
GO:0006690	icosanoid metabolic process	9/627	50/11457	0.001384	0.0153713	0.0114494	Cd74/Ptges/Ltc4s/Akr1c14/Ephx1/Cyp1b1/Ggt5/Dpep1/Avpr1a	9
GO:0035904	aorta development	9/627	50/11457	0.001384	0.0153713	0.0114494	Acvrl1/Ltbp1/Lrp2/Tbx2/Egr2/Hes1/Enpp1/Lox/Tfap2b	9
GO:0051926	negative regulation of calcium ion transport	9/627	50/11457	0.001384	0.0153713	0.0114494	Nos1/Cabp1/Cav1/Rrad/Gnao1/Gem/Hes1/Ace/Stc1	9
GO:0070252	actin-mediated cell contraction	9/627	50/11457	0.001384	0.0153713	0.0114494	Limch1/Acta2/Nos1/Vil1/Cav1/Cacna1c/Cacna2d1/Kcnj2/Stc1	9
GO:0031623	receptor internalization	14/627	103/11457	0.00140612	0.0155755	0.0116015	Cd36/Hpca/Snap25/Cacng8/Cav1/Ackr3/Dnm3/Ramp2/Itgb3/Nrg1/Entrep1/Lpar1/Necab2/Adm	14
GO:0001570	vasculogenesis	10/627	60/11457	0.00141205	0.0155998	0.0116196	Asb4/Cav1/Ackr3/Ramp2/Zfp36l1/Npr2/Cd34/Kdr/Enpp1/Adm	10
GO:0002717	positive regulation of natural killer cell mediated immunity	4/627	10/11457	0.00143114	0.015627	0.0116399	Crtam/Ulbp1/Stat5b/Stat5a	4
GO:0042481	regulation of odontogenesis	4/627	10/11457	0.00143114	0.015627	0.0116399	Wnt10a/Csf1/Cd34/Apcdd1	4
GO:0045836	positive regulation of meiotic nuclear division	4/627	10/11457	0.00143114	0.015627	0.0116399	Npr2/Plcb1/Wnt5a/Eif4g3	4
GO:0045954	positive regulation of natural killer cell mediated cytotoxicity	4/627	10/11457	0.00143114	0.015627	0.0116399	Crtam/Ulbp1/Stat5b/Stat5a	4
GO:0014065	phosphatidylinositol 3-kinase signaling	13/627	92/11457	0.00143697	0.015627	0.0116399	Ntrk1/Hcls1/Musk/Ptpn6/Pdgfa/Dab2ip/Zfp36l1/Flt1/Dcn/Igf1/Kdr/Ror2/Agt	13
GO:0030278	regulation of ossification	13/627	92/11457	0.00143697	0.015627	0.0116399	P2rx7/Ptn/Csf1r/Tph1/Actn3/Csf1/Osr2/Egr2/Wnt5a/Omd/Enpp1/Notum/Fbn2	13
GO:0010517	regulation of phospholipase activity	7/627	32/11457	0.00144094	0.0156295	0.0116418	Hpca/Pla2r1/Flt1/Pdgfra/Rgs2/Lpar1/Agt	7
GO:0032640	tumor necrosis factor production	15/627	115/11457	0.00147466	0.0159476	0.0118787	Cd36/Il23a/Csf1r/Ptpn6/Nr1h4/Arid5a/Isl1/Bcl3/Akap12/Thbs1/Cd34/Mc1r/Igf1/Gas6/Wnt5a	15
GO:0002683	negative regulation of immune system process	28/627	280/11457	0.00147791	0.0159476	0.0118787	Crtam/Hc/Adgrf5/Milr1/Ifi213/Lrrc17/Lpxn/Bank1/Gata2/Ptpn6/Nckap1l/Mmp28/Hlx/Dab2ip/Tap2/Serpinb9b/Zfp608/Cd74/Thbs1/Stat5a/Plcb1/Fstl3/Igf1/Tap1/Hmgb3/Slit2/Cebpa/Svep1	28
GO:0002474	antigen processing and presentation of peptide antigen via MHC class I	6/627	24/11457	0.00151175	0.0161001	0.0119923	Ulbp1/Tap2/H2-Q4/H2-K1/Tap1/H2-T23	6
GO:0030195	negative regulation of blood coagulation	6/627	24/11457	0.00151175	0.0161001	0.0119923	Tspan8/Pdgfa/C1qtnf1/Thbs1/Cd34/Pdgfra	6
GO:0030574	collagen catabolic process	6/627	24/11457	0.00151175	0.0161001	0.0119923	Mmp15/Ctsk/Mmp28/Fap/Adamts2/Mmp3	6
GO:0046006	regulation of activated T cell proliferation	6/627	24/11457	0.00151175	0.0161001	0.0119923	Crtam/Il23a/Stat5b/Stat5a/Igf1/Ripk3	6
GO:1900047	negative regulation of hemostasis	6/627	24/11457	0.00151175	0.0161001	0.0119923	Tspan8/Pdgfa/C1qtnf1/Thbs1/Cd34/Pdgfra	6
GO:0001763	morphogenesis of a branching structure	17/627	139/11457	0.00151517	0.0161001	0.0119923	Col4a1/Fgf7/Areg/Csf1/Pdgfa/Flt1/Pdgfra/Tbx2/Igf1/Lama5/Wnt5a/Hhip/Slit2/Kdr/Agt/Adm/Ar	17
GO:0061458	reproductive system development	21/627	189/11457	0.00155968	0.0165311	0.0123133	Ntrk1/Bmp5/Afp/Serpinb6b/Fgf7/Foxc1/Lrp2/Tcf7/Stat5b/Tesc/Stra6/Npr2/Stat5a/Pdgfra/Igf1/Ace/Wnt5a/Kdr/Ror2/Agt/Ar	21
GO:0010595	positive regulation of endothelial cell migration	12/627	82/11457	0.00159271	0.0167958	0.0125105	Gpld1/Col18a1/Gata2/Itgb3/Plpp3/Thbs1/Stat5a/Igf1/Wnt5a/Kdr/Agt/Vegfc	12
GO:0071466	cellular response to xenobiotic stimulus	12/627	82/11457	0.00159271	0.0167958	0.0125105	As3mt/Gpld1/Nos1/Cd69/Akr1c13/Akr1c12/Nr1h4/Gsta4/Gas6/Cyp1b1/Dpep1/Rora	12
GO:0002260	lymphocyte homeostasis	10/627	61/11457	0.00160799	0.0168554	0.0125549	Dock10/P2rx7/Tnfsf13b/Nckap1l/Slc40a1/Cd74/Stat5b/Stat5a/Ripk3/Enpp1	10
GO:0048146	positive regulation of fibroblast proliferation	10/627	61/11457	0.00160799	0.0168554	0.0125549	Pdgfa/Itgb3/Cd74/Pdgfra/Cdkn1a/Igf1/Gas6/Wnt5a/Fbln1/Agt	10
GO:0030178	negative regulation of Wnt signaling pathway	15/627	116/11457	0.00161046	0.0168554	0.0125549	Cxxc4/Tmem88/Isl1/Cav1/Dab2ip/Axin2/Tle2/Tbx18/Apcdd1/Bicc1/Wnt5a/Cthrc1/Ror2/Notum/Nkd2	15
GO:0051046	regulation of secretion	38/627	421/11457	0.00161467	0.0168571	0.0125561	Pclo/Atp9a/Snap25/P2rx7/Ano1/Pla2r1/Gpld1/Syt1/Nos1/Pde8b/Unc13d/Kcnn4/Spp1/Gata2/Nr1h4/Rapgef4/Nckap1l/Isl1/Cacna1a/Sv2a/C1qtnf1/Cd74/Ptges/Ces1a/Gnao1/Cacna1c/Sybu/Plcb1/Nrg1/Igf1/Ace/Sncaip/Anpep/Stc1/Agt/Avpr1a/Vegfc/Tfap2b	38
GO:0051602	response to electrical stimulus	5/627	17/11457	0.00172339	0.0178202	0.0132735	Ntrk1/Musk/P2rx7/Prickle2/Fbxo32	5
GO:0097254	renal tubular secretion	5/627	17/11457	0.00172339	0.0178202	0.0132735	Ace/Anpep/Stc1/Agt/Avpr1a	5
GO:2000647	negative regulation of stem cell proliferation	5/627	17/11457	0.00172339	0.0178202	0.0132735	Irf6/Rarb/Nfib/Fbln1/Cebpa	5
GO:0098771	inorganic ion homeostasis	31/627	324/11457	0.0017241	0.0178202	0.0132735	P2rx7/Cxcl9/Atp2c2/Lck/Spp1/Trf/Ptpn6/Cav1/Ank3/Cacna1a/Mtss1/Itgb3/Sv2a/Bdh2/Slc40a1/Tesc/Cp/Cacna1c/Grik2/Plcb1/Synpo/Ace/Wnt5a/Kdr/Stc2/Anpep/Enpp1/Stc1/Agt/Avpr1a/Adm	31
GO:0022407	regulation of cell-cell adhesion	28/627	283/11457	0.00173267	0.0178202	0.0132735	Crtam/Rasal3/Tnfsf13b/Il23a/Lck/Ptpn6/Il2rg/Nckap1l/Cav1/Zdhhc2/Adam19/Ank3/Hlx/Tenm3/Plpp3/Zfp608/C1qtnf1/Cd74/Stat5b/Stat5a/Tbx18/Emilin2/Hes1/Fstl3/Igf1/Sox12/Lrfn3/Wnt5a	28
GO:0006936	muscle contraction	18/627	153/11457	0.00174106	0.0178202	0.0132735	Adra1b/Acta2/Tbxa2r/Nos1/Lck/Ccn2/Actn3/Cav1/Cacna1c/Cacna2d1/Bdkrb2/Flt1/Tbx2/Rgs2/Stac2/Kcnj2/Stc1/Agt	18
GO:0003407	neural retina development	7/627	33/11457	0.00174397	0.0178202	0.0132735	Ptn/Rpgrip1/Casz1/Hes1/Fjx1/Zhx2/Cfh	7
GO:0048002	antigen processing and presentation of peptide antigen	7/627	33/11457	0.00174397	0.0178202	0.0132735	Ulbp1/Tap2/Cd74/H2-Q4/H2-K1/Tap1/H2-T23	7
GO:0014812	muscle cell migration	13/627	94/11457	0.0017542	0.0178202	0.0132735	Rapgef4/Cav1/Pdgfa/Itgb3/Stat5b/Igf1/Ace/Lpar1/Cyp1b1/Postn/Slit2/Enpp1/Agt	13
GO:0034767	positive regulation of monoatomic ion transmembrane transport	13/627	94/11457	0.0017542	0.0178202	0.0132735	P2rx7/Cxcl9/Nos1/Cacng8/Cav1/Ank3/Tesc/Cacna1c/Cacna2d1/Stac2/Plcb1/Cnksr3/Kcnj2	13
GO:0071706	tumor necrosis factor superfamily cytokine production	15/627	117/11457	0.00175658	0.0178202	0.0132735	Cd36/Il23a/Csf1r/Ptpn6/Nr1h4/Arid5a/Isl1/Bcl3/Akap12/Thbs1/Cd34/Mc1r/Igf1/Gas6/Wnt5a	15
GO:0046660	female sex differentiation	12/627	83/11457	0.0017716	0.0178202	0.0132735	Afp/Fgf7/Foxc1/Lrp2/Stat5b/Stra6/Npr2/Stat5a/Pdgfra/Wnt5a/Kdr/Agt	12
GO:0045619	regulation of lymphocyte differentiation	17/627	141/11457	0.00177204	0.0178202	0.0132735	Crtam/Il23a/Duxbl1/Lck/Ptpn6/Il2rg/Nckap1l/Hlx/Zfp608/Zfp36l1/Cd74/Tcf7/Stat5b/Stat5a/Gas6/Sox12/Hmgb3	17
GO:0045444	fat cell differentiation	21/627	191/11457	0.00177869	0.0178202	0.0132735	Adgrf5/Gata2/Tph1/Axin2/Zfp36l1/Npr2/Pdgfra/Dio2/Egr2/Rgs2/Plcb1/Hes1/Igf1/Selenbp1/Wnt5a/Ccdc3/Enpp1/Rora/Cebpa/Tfap2b/Gdf10	21
GO:0048598	embryonic morphogenesis	37/627	409/11457	0.00177919	0.0178202	0.0132735	Bmp5/Cryaa/Gata2/Prrx1/Hlx/Mfap2/Foxc1/Plpp3/Lrp2/Zfp36l1/Osr2/Irx1/Tcf7/Aff3/Stra6/Cacna1c/Flt1/Wnt9a/Pdgfra/Tbx2/Alx3/Rarb/Tbx18/Hes1/Lama5/Ntn1/Trim71/Wnt5a/Aldh1a1/Cthrc1/Enpp1/Ror2/Alx4/Adm/Ar/Vegfc/Fbn2	37
GO:0007411	axon guidance	16/627	129/11457	0.00177946	0.0178202	0.0132735	Ntrk1/Csf1r/Isl1/Bdnf/Ank3/Lrp2/Sema4g/Egr2/Slit3/Lama5/Ntn1/Nfib/Sema3f/Crmp1/Wnt5a/Slit2	16
GO:0097485	neuron projection guidance	16/627	129/11457	0.00177946	0.0178202	0.0132735	Ntrk1/Csf1r/Isl1/Bdnf/Ank3/Lrp2/Sema4g/Egr2/Slit3/Lama5/Ntn1/Nfib/Sema3f/Crmp1/Wnt5a/Slit2	16
GO:0071621	granulocyte chemotaxis	10/627	62/11457	0.0018254	0.0182365	0.0135836	Cxcl9/Il23a/Spp1/Csf1r/Nckap1l/Csf1/Cd74/Thbs1/Dpep1/Slit2	10
GO:0006814	sodium ion transport	14/627	106/11457	0.00185824	0.0185203	0.013795	P2rx7/Nos1/Slc4a5/Slc5a4a/Slc9a9/Ank3/Fxyd5/Klhl24/Tesc/Plcb1/Cnksr3/Nalcn/Slc6a15/Scn8a	14
GO:0045907	positive regulation of vasoconstriction	6/627	25/11457	0.00189838	0.0188305	0.014026	Tbxa2r/Cav1/Faah/Adra1d/Ace/Avpr1a	6
GO:0071715	icosanoid transport	6/627	25/11457	0.00189838	0.0188305	0.014026	P2rx7/Pla2r1/Ptges/Bdkrb2/Ace/Slco3a1	6
GO:0055080	monoatomic cation homeostasis	34/627	368/11457	0.00190348	0.0188363	0.0140304	P2rx7/Cxcl9/Atp2c2/Slc4a5/Hvcn1/Lck/Spp1/Trf/Ptpn6/Slc9a9/Cav1/Ank3/Cacna1a/Mtss1/Itgb3/Sv2a/Bdh2/Slc40a1/Tesc/Cp/Cacna1c/Grik2/Plcb1/Synpo/Ace/Wnt5a/Kdr/Stc2/Anpep/Enpp1/Stc1/Agt/Avpr1a/Adm	34
GO:0090090	negative regulation of canonical Wnt signaling pathway	13/627	95/11457	0.00193331	0.0190863	0.0142165	Tmem88/Isl1/Cav1/Dab2ip/Axin2/Tle2/Tbx18/Bicc1/Wnt5a/Cthrc1/Ror2/Notum/Nkd2	13
GO:0031644	regulation of nervous system process	12/627	84/11457	0.00196667	0.0193699	0.0144278	Pclo/Acpp/Rgs4/Nos1/Trf/Rapgef4/Grik2/Egr2/Igsf11/Igf1/Agt/Avpr1a	12
GO:0048754	branching morphogenesis of an epithelial tube	14/627	107/11457	0.00203342	0.0199801	0.0148823	Col4a1/Areg/Csf1/Flt1/Pdgfra/Tbx2/Igf1/Lama5/Wnt5a/Hhip/Slit2/Kdr/Agt/Ar	14
GO:0030510	regulation of BMP signaling pathway	10/627	63/11457	0.00206595	0.0202522	0.015085	Acvrl1/Cav1/Chrdl1/Lrp2/Htra1/Hes1/Fstl3/Wnt5a/Kdr/Tfap2b	10
GO:0050801	monoatomic ion homeostasis	34/627	370/11457	0.00208175	0.0203593	0.0151648	P2rx7/Cxcl9/Atp2c2/Slc4a5/Hvcn1/Lck/Spp1/Trf/Ptpn6/Slc9a9/Cav1/Ank3/Cacna1a/Mtss1/Itgb3/Sv2a/Bdh2/Slc40a1/Tesc/Cp/Cacna1c/Grik2/Plcb1/Synpo/Ace/Wnt5a/Kdr/Stc2/Anpep/Enpp1/Stc1/Agt/Avpr1a/Adm	34
GO:0099590	neurotransmitter receptor internalization	7/627	34/11457	0.00209424	0.020426	0.0152144	Hpca/Snap25/Cacng8/Dnm3/Itgb3/Nrg1/Lpar1	7
GO:0046425	regulation of receptor signaling pathway via JAK-STAT	9/627	53/11457	0.00211549	0.020426	0.0152144	Il23a/Mst1/Cav1/Bcl3/Ghr/Stra6/Hes1/Cyp1b1/Agt	9
GO:0048844	artery morphogenesis	9/627	53/11457	0.00211549	0.020426	0.0152144	Adgrf5/Acvrl1/Prrx1/Foxc1/Lrp2/Stra6/Tbx2/Hes1/Tfap2b	9
GO:0030856	regulation of epithelial cell differentiation	13/627	96/11457	0.00212723	0.020426	0.0152144	Nkx6-3/Acvrl1/Csf1r/Sult2b1/Cav1/Foxc1/Zfp36l1/Stat5b/Stat5a/Wnt9a/Plcb1/Macroh2a2/Hes1	13
GO:0002486	antigen processing and presentation of endogenous peptide antigen via MHC class I via ER pathway, TAP-independent	4/627	11/11457	0.00215216	0.020426	0.0152144	Ulbp1/H2-Q4/H2-K1/H2-T23	4
GO:0010460	positive regulation of heart rate	4/627	11/11457	0.00215216	0.020426	0.0152144	Adra1b/Rgs4/Avpr1a/Adm	4
GO:0010743	regulation of macrophage derived foam cell differentiation	4/627	11/11457	0.00215216	0.020426	0.0152144	Cd36/Csf1/Itgb3/Agt	4
GO:0021783	preganglionic parasympathetic fiber development	4/627	11/11457	0.00215216	0.020426	0.0152144	Ackr3/Egr2/Hes1/Sema3f	4
GO:0035813	regulation of renal sodium excretion	4/627	11/11457	0.00215216	0.020426	0.0152144	Ace/Anpep/Agt/Avpr1a	4
GO:0045136	development of secondary sexual characteristics	4/627	11/11457	0.00215216	0.020426	0.0152144	Areg/Stat5b/Stat5a/Wnt5a	4
GO:0050951	sensory perception of temperature stimulus	4/627	11/11457	0.00215216	0.020426	0.0152144	Ntrk1/Ano1/Grik2/Enpp1	4
GO:0060221	retinal rod cell differentiation	4/627	11/11457	0.00215216	0.020426	0.0152144	Ptn/Rpgrip1/Casz1/Cfh	4
GO:2000288	positive regulation of myoblast proliferation	4/627	11/11457	0.00215216	0.020426	0.0152144	Fgf7/Csf1r/Tbx18/Igf1	4
GO:1904035	regulation of epithelial cell apoptotic process	11/627	74/11457	0.0021675	0.0205249	0.0152882	Pla2r1/Mst1/Col18a1/Gata2/Ecscr/Ramp2/Zfp36l1/Thbs1/Igf1/Gas6/Kdr	11
GO:0006937	regulation of muscle contraction	12/627	85/11457	0.002179	0.0205871	0.0153345	Adra1b/Tbxa2r/Lck/Ccn2/Actn3/Cav1/Cacna1c/Cacna2d1/Flt1/Rgs2/Kcnj2/Stc1	12
GO:0043065	positive regulation of apoptotic process	39/627	443/11457	0.00221309	0.020862	0.0155392	Musk/P2rx7/Ptn/Ctsk/Pla2r1/Gpld1/Mst1/Lck/Col18a1/Casp1/Cav1/Ecscr/Akap12/Dab2ip/Ptprf/Fbxo32/Bmf/Trp53inp1/Olfm1/Thbs1/Timp3/Grik2/Htra1/Rarb/Emilin2/Tpd52l1/Fap/Ace/Optn/Lpar1/Cyp1b1/Prdm11/Wnt5a/Ripk3/Aldh1a1/Slit2/Agt/Adm/Tfap2b	39
GO:0042886	amide transport	24/627	234/11457	0.00224458	0.0210637	0.0156895	Slc14a1/Pclo/Snap25/P2rx7/Ano1/Gpld1/Nos1/Pde8b/Nr1h4/Rapgef4/Isl1/Bdnf/Tap2/Lrp2/Cd74/Gnao1/Cacna1c/Dio2/Sybu/Plcb1/Tap1/Agt/Avpr1a/Tfap2b	24
GO:0050867	positive regulation of cell activation	24/627	234/11457	0.00224458	0.0210637	0.0156895	Rasal3/Acta2/Ulbp1/Tnfsf13b/Il23a/Lck/Csf1r/Gata2/Il2rg/Nckap1l/Ccn2/Cav1/Hlx/Cd74/Stat5b/Thbs1/Stat5a/Cdkn1a/Hes1/Igf1/Gas6/Sox12/Wnt5a/Cebpa	24
GO:0010632	regulation of epithelial cell migration	20/627	182/11457	0.00227714	0.0212527	0.0158302	Tbxa2r/Gpld1/Acvrl1/Vil1/Fgf7/Col18a1/Gata2/Dab2ip/Itgb3/Plpp3/Thbs1/Stat5a/Dcn/Igf1/Wnt5a/Slit2/Kdr/Stc1/Agt/Vegfc	20
GO:0014706	striated muscle tissue development	20/627	182/11457	0.00227714	0.0212527	0.0158302	Ccnd2/Bmp5/Adra1b/Rgs4/Nrap/Cavin4/Isl1/Bdnf/Foxc1/Lrp2/Pdgfra/Tbx2/Rgs2/Rarb/Nrg1/Tbx18/Igf1/Wnt5a/Agt/Lox	20
GO:0002455	humoral immune response mediated by circulating immunoglobulin	5/627	18/11457	0.00227998	0.0212527	0.0158302	Mbl2/Hc/Ptpn6/Bcl3/Svep1	5
GO:0048145	regulation of fibroblast proliferation	13/627	97/11457	0.00233687	0.0215235	0.0160319	Cav1/Pdgfa/Dab2ip/Itgb3/Trp53inp1/Cd74/Pdgfra/Cdkn1a/Igf1/Gas6/Wnt5a/Fbln1/Agt	13
GO:0021545	cranial nerve development	6/627	26/11457	0.00235542	0.0215235	0.0160319	Isl1/Ackr3/Npr2/Egr2/Hes1/Sema3f	6
GO:0048246	macrophage chemotaxis	6/627	26/11457	0.00235542	0.0215235	0.0160319	Hc/Mst1/Csf1r/Mmp28/Csf1/Thbs1	6
GO:0051955	regulation of amino acid transport	6/627	26/11457	0.00235542	0.0215235	0.0160319	P2rx7/Rgs4/Sv2a/Rgs2/Agt/Avpr1a	6
GO:0055078	sodium ion homeostasis	6/627	26/11457	0.00235542	0.0215235	0.0160319	Spp1/Tesc/Ace/Anpep/Agt/Avpr1a	6
GO:0070509	calcium ion import	6/627	26/11457	0.00235542	0.0215235	0.0160319	Atp2c2/Cacna1a/Cacna1c/Hes1/Ace/Stc1	6
GO:0086001	cardiac muscle cell action potential	6/627	26/11457	0.00235542	0.0215235	0.0160319	Cav1/Ank3/Cacna1c/Cacna2d1/Tbx18/Kcnj2	6
GO:1903115	regulation of actin filament-based movement	6/627	26/11457	0.00235542	0.0215235	0.0160319	Acta2/Nos1/Cav1/Cacna1c/Kcnj2/Stc1	6
GO:1904894	positive regulation of receptor signaling pathway via STAT	6/627	26/11457	0.00235542	0.0215235	0.0160319	Il23a/Ghr/Stra6/Hes1/Cyp1b1/Agt	6
GO:0031102	neuron projection regeneration	8/627	44/11457	0.00236703	0.0215823	0.0160758	Ptn/Scarf1/Prrx1/Ptprf/Nrep/Nrg1/Enpp1/Adm	8
GO:0009725	response to hormone	41/627	474/11457	0.00238546	0.021703	0.0161656	Kank1/Hcls1/Adra1b/Gpld1/Nos1/Spp1/Nr1h4/Arid5a/Isl1/Areg/Cav1/Bdnf/Crebrf/Ramp2/Pid1/Ptprf/Fbxo32/Lrp2/Zfp36l1/Msi1/Ghr/Stat5b/Npr2/Stat5a/Timp3/Egr2/Cpeb1/Rarb/Plcb1/Peg13/Igf1/Ptgfr/Sesn3/Rerg/Enpp1/Mme/Grb14/Agt/Avpr1a/Lox/Ar	41
GO:0032946	positive regulation of mononuclear cell proliferation	12/627	86/11457	0.0024097	0.0218577	0.0162809	Rasal3/Tnfsf13b/Il23a/Csf1r/Nckap1l/Csf1/Cd74/Stat5b/Stat5a/Cdkn1a/Hes1/Igf1	12
GO:0071805	potassium ion transmembrane transport	11/627	75/11457	0.00241772	0.0218577	0.0162809	Rgs4/Kcnn4/Slc9a9/Cav1/Ank3/Klhl24/Kcnt2/Kcnn1/Kcnip3/Nalcn/Kcnj2	11
GO:0097120	receptor localization to synapse	9/627	54/11457	0.00241817	0.0218577	0.0162809	Mapk10/Snap25/Dlg2/Anks1b/Rapgef4/Cacng8/Itgb3/Nsg1/Cep112	9
GO:0060759	regulation of response to cytokine stimulus	14/627	109/11457	0.00242491	0.0218713	0.016291	Sigirr/Hspa1a/Casp1/Nr1h4/Cav1/Csf1/Crebrf/Ptprf/Cd74/Slit3/Gas6/Wnt5a/Slit2/Ccdc3	14
GO:1902074	response to salt	20/627	184/11457	0.00259043	0.0232761	0.0173374	Cd36/Hpca/Adra1b/P2rx7/Gpld1/Syt1/Nos1/Dlg2/Casp1/Cav1/Bdnf/Fosb/Npr2/Thbs1/Fos/Plcb1/Sdk1/Chrm4/Enpp1/Cebpa	20
GO:0051347	positive regulation of transferase activity	34/627	375/11457	0.0025918	0.0232761	0.0173374	Ntrk1/Epha1/Ccnd2/Musk/P2rx7/Il23a/Cass4/Abi3/Csf1r/Areg/Csf1/Pdgfa/Dab2ip/Itgb3/Axin2/Cd74/Ghr/Flt1/Thbs1/Pdgfra/Nrg1/Tgfa/Cdkn1a/Tpd52l1/Igf1/Gas6/Ace/Arrdc4/Wnt5a/Ripk3/Kdr/Ror2/Agt/Vegfc	34
GO:0008306	associative learning	10/627	65/11457	0.00262356	0.0234604	0.0174747	Snap25/Adra1b/Pde8b/Rgs14/Bdnf/Btg2/Cacna1c/Peg13/Synpo/Agt	10
GO:0042471	ear morphogenesis	10/627	65/11457	0.00262356	0.0234604	0.0174747	Gata2/Prrx1/Osr2/Tbx2/Tbx18/Ntn1/Wnt5a/Cthrc1/Enpp1/Ror2	10
GO:0097530	granulocyte migration	11/627	76/11457	0.00269081	0.0240103	0.0178843	Cxcl9/Il23a/Spp1/Csf1r/Nckap1l/Csf1/Pecam1/Cd74/Thbs1/Dpep1/Slit2	11
GO:0001656	metanephros development	8/627	45/11457	0.00274373	0.0242237	0.0180432	Pdgfa/Mtss1/Osr2/Irx1/Pdgfra/Hes1/Slit2/Tfap2b	8
GO:0001960	negative regulation of cytokine-mediated signaling pathway	8/627	45/11457	0.00274373	0.0242237	0.0180432	Sigirr/Nr1h4/Cav1/Ptprf/Slit3/Gas6/Slit2/Ccdc3	8
GO:0002067	glandular epithelial cell differentiation	8/627	45/11457	0.00274373	0.0242237	0.0180432	Bmp5/Nkx6-3/Gata2/Cav1/Rarb/Hes1/Nfib/Wnt5a	8
GO:0006942	regulation of striated muscle contraction	8/627	45/11457	0.00274373	0.0242237	0.0180432	Adra1b/Ccn2/Actn3/Cav1/Cacna1c/Rgs2/Kcnj2/Stc1	8
GO:0008543	fibroblast growth factor receptor signaling pathway	8/627	45/11457	0.00274373	0.0242237	0.0180432	Fgf7/Ccn2/Thbs1/Tbx2/Trim71/Wnt5a/Hhip/Enpp1	8
GO:0044344	cellular response to fibroblast growth factor stimulus	9/627	55/11457	0.00275422	0.0242651	0.018074	Fgf7/Ccn2/Zfp36l1/Thbs1/Tbx2/Trim71/Wnt5a/Hhip/Enpp1	9
GO:0006898	receptor-mediated endocytosis	20/627	185/11457	0.0027602	0.0242665	0.0180751	Cd36/Cxcl16/Hpca/Snap25/Pla2r1/Scarf1/Trf/Cubn/Cacng8/Cav1/Ackr3/Dnm3/Ramp2/Itgb3/Lrp2/Nrg1/Entrep1/Lpar1/Necab2/Adm	20
GO:0055007	cardiac muscle cell differentiation	13/627	99/11457	0.00280714	0.0246273	0.0183438	Ccnd2/Adra1b/Rgs4/Nrap/Cavin4/Isl1/Pdgfra/Rgs2/Rarb/Nrg1/Tbx18/Igf1/Agt	13
GO:0001894	tissue homeostasis	18/627	160/11457	0.00286297	0.0250121	0.0186305	P2rx7/Ctsk/Spp1/Trf/Csf1r/Ocln/Gata2/Ccn2/Csf1/Foxc1/Itgb3/Slc28a2/Bdkrb2/Cd34/Muc13/Nfib/Aldh1a1/Enpp1	18
GO:0060249	anatomical structure homeostasis	18/627	160/11457	0.00286297	0.0250121	0.0186305	P2rx7/Ctsk/Spp1/Trf/Csf1r/Ocln/Gata2/Ccn2/Csf1/Foxc1/Itgb3/Slc28a2/Bdkrb2/Cd34/Muc13/Nfib/Aldh1a1/Enpp1	18
GO:0050776	regulation of immune response	41/627	479/11457	0.00288413	0.0250434	0.0186537	Crtam/Cd36/Mbl2/Hc/P2rx7/Ulbp1/Fyb/Tnfsf13b/Il23a/Gpld1/Ifi213/Unc13d/Kcnn4/Hspa1a/Myo1g/Lpxn/Lck/Casp1/Gata2/Ptpn6/Nr1h4/Nckap1l/Arid5a/Cav1/Hlx/Dab2ip/Tap2/Serpinb9b/Cd74/Stat5b/Tnip3/Stat5a/H2-Q4/H2-K1/Tap1/Wnt5a/H2-T23/Ripk3/Cfh/Svep1/Colec12	41
GO:0033687	osteoblast proliferation	6/627	27/11457	0.00289054	0.0250434	0.0186537	Itgb3/Axin2/Osr2/Npr3/Fbln5/Cthrc1	6
GO:0035137	hindlimb morphogenesis	6/627	27/11457	0.00289054	0.0250434	0.0186537	Osr2/Aff3/Alx3/Rarb/Alx4/Tfap2b	6
GO:0050798	activated T cell proliferation	6/627	27/11457	0.00289054	0.0250434	0.0186537	Crtam/Il23a/Stat5b/Stat5a/Igf1/Ripk3	6
GO:0055074	calcium ion homeostasis	20/627	186/11457	0.0029392	0.0251469	0.0187309	P2rx7/Cxcl9/Atp2c2/Lck/Spp1/Ptpn6/Cav1/Cacna1a/Itgb3/Sv2a/Cacna1c/Grik2/Plcb1/Synpo/Wnt5a/Kdr/Stc2/Enpp1/Stc1/Adm	20
GO:0046849	bone remodeling	10/627	66/11457	0.00294431	0.0251469	0.0187309	P2rx7/Ptn/Ctsk/Spp1/Trf/Csf1r/Tph1/Itgb3/Cthrc1/Enpp1	10
GO:0050922	negative regulation of chemotaxis	7/627	36/11457	0.0029556	0.0251469	0.0187309	Hc/Mmp28/Thbs1/Sema4g/Sema3f/Wnt5a/Slit2	7
GO:1902305	regulation of sodium ion transmembrane transport	7/627	36/11457	0.0029556	0.0251469	0.0187309	Nos1/Ank3/Fxyd5/Klhl24/Tesc/Plcb1/Cnksr3	7
GO:1990868	response to chemokine	7/627	36/11457	0.0029556	0.0251469	0.0187309	Cxcl9/Ackr3/Foxc1/Slit3/Entrep1/Slit2/Lox	7
GO:1990869	cellular response to chemokine	7/627	36/11457	0.0029556	0.0251469	0.0187309	Cxcl9/Ackr3/Foxc1/Slit3/Entrep1/Slit2/Lox	7
GO:0045672	positive regulation of osteoclast differentiation	5/627	19/11457	0.00295669	0.0251469	0.0187309	Il23a/Csf1r/Csf1/Itgb3/Fos	5
GO:0060914	heart formation	5/627	19/11457	0.00295669	0.0251469	0.0187309	Isl1/Axin2/Lrp2/Hes1/Wnt5a	5
GO:2000178	negative regulation of neural precursor cell proliferation	5/627	19/11457	0.00295669	0.0251469	0.0187309	Ptn/Gata2/Bdnf/Btg2/Wnt5a	5
GO:0008277	regulation of G protein-coupled receptor signaling pathway	11/627	77/11457	0.00298826	0.0253609	0.0188902	Acpp/Rgs4/Kctd12b/Nos1/Rgs14/Ramp2/Itgb3/Rgs2/Plcb1/Necab2/Adm	11
GO:0048858	cell projection morphogenesis	41/627	480/11457	0.00299399	0.0253609	0.0188902	Ntrk1/Kank1/Dock10/Ptn/Ano1/Syt1/Vil1/Csf1r/Ngef/Nckap1l/Lifr/Arhgef28/Isl1/Bdnf/Ank3/Dab2ip/Dnm3/Cacna1a/Ptprf/Itgb3/Obsl1/Lrp2/Rnf157/Olfm1/Npr2/Sema4g/Egr2/Slit3/Stau2/Col25a1/Zswim6/Lama5/Ntn1/Nfib/Sema3f/Crmp1/Wnt5a/Postn/Auts2/Slit2/Kdr	41
GO:0007160	cell-matrix adhesion	18/627	161/11457	0.00306403	0.0257529	0.0191823	Cd36/Epha1/Limch1/Adamts12/Acvrl1/Itgb4/Ccn2/Actn3/Csf1/Pecam1/Itgb3/Thbs1/Cd34/Postn/Kdr/Itgbl1/Agt/Nid1	18
GO:0008406	gonad development	16/627	136/11457	0.00306661	0.0257529	0.0191823	Ntrk1/Afp/Serpinb6b/Fgf7/Foxc1/Lrp2/Stat5b/Tesc/Npr2/Stat5a/Pdgfra/Ace/Wnt5a/Kdr/Agt/Ar	16
GO:0007406	negative regulation of neuroblast proliferation	4/627	12/11457	0.00308961	0.0257529	0.0191823	Ptn/Gata2/Bdnf/Btg2	4
GO:0021983	pituitary gland development	4/627	12/11457	0.00308961	0.0257529	0.0191823	Gata2/Isl1/Hes1/Wnt5a	4
GO:0030540	female genitalia development	4/627	12/11457	0.00308961	0.0257529	0.0191823	Lrp2/Stra6/Npr2/Wnt5a	4
GO:0035812	renal sodium excretion	4/627	12/11457	0.00308961	0.0257529	0.0191823	Ace/Anpep/Agt/Avpr1a	4
GO:0048486	parasympathetic nervous system development	4/627	12/11457	0.00308961	0.0257529	0.0191823	Ackr3/Egr2/Hes1/Sema3f	4
GO:0086010	membrane depolarization during action potential	4/627	12/11457	0.00308961	0.0257529	0.0191823	Ank3/Cacna1c/Cacna2d1/Scn8a	4
GO:0035249	synaptic transmission, glutamatergic	9/627	56/11457	0.00312617	0.0260057	0.0193706	Ntrk1/Clstn3/Syt1/Cacng8/Cacna1a/Grik2/Peg13/Gria3/Ror2	9
GO:0045670	regulation of osteoclast differentiation	8/627	46/11457	0.00316563	0.0261776	0.0194986	Il23a/Lrrc17/Csf1r/Csf1/Itgb3/Prxl2a/Fos/Fstl3	8
GO:0051952	regulation of amine transport	8/627	46/11457	0.00316563	0.0261776	0.0194986	P2rx7/Rgs4/Syt1/Cacna1a/Sv2a/Rgs2/Agt/Avpr1a	8
GO:0061035	regulation of cartilage development	8/627	46/11457	0.00316563	0.0261776	0.0194986	Ctsk/Adamts12/Ccn2/Axin2/Wnt9a/Rarb/Wnt5a/Mboat2	8
GO:0043534	blood vessel endothelial cell migration	12/627	89/11457	0.0032238	0.0266059	0.0198176	Tbxa2r/Gpld1/Acvrl1/Col18a1/Gata2/Thbs1/Stat5a/Igf1/Cyp1b1/Slit2/Kdr/Vegfc	12
GO:0055013	cardiac muscle cell development	10/627	67/11457	0.00329559	0.0271162	0.0201977	Adra1b/Rgs4/Nrap/Cavin4/Isl1/Pdgfra/Rgs2/Tbx18/Igf1/Agt	10
GO:0002705	positive regulation of leukocyte mediated immunity	11/627	78/11457	0.0033116	0.0271162	0.0201977	Crtam/P2rx7/Ulbp1/Il23a/Arid5a/Tap2/Stat5b/Stat5a/H2-Q4/H2-K1/H2-T23	11
GO:0006941	striated muscle contraction	11/627	78/11457	0.0033116	0.0271162	0.0201977	Adra1b/Nos1/Ccn2/Actn3/Cav1/Cacna1c/Cacna2d1/Rgs2/Stac2/Kcnj2/Stc1	11
GO:0072073	kidney epithelium development	11/627	78/11457	0.0033116	0.0271162	0.0201977	Bdnf/Mtss1/Foxc1/Irx1/Basp1/Rarb/Hes1/Lama5/Slit2/Agt/Tfap2b	11
GO:0043588	skin development	19/627	175/11457	0.00331841	0.0271188	0.0201996	Krt76/Cers3/Fgf7/Itgb4/Irf6/Wnt10a/Pdgfa/Foxc1/Zfp36l1/Slc2a10/Macroh2a2/Apcdd1/Adamts2/Tnfrsf19/Lama5/Wnt5a/Enpp1/Alx4/Tfap2b	19
GO:0002819	regulation of adaptive immune response	15/627	125/11457	0.00337264	0.0275081	0.0204896	P2rx7/Ulbp1/Tnfsf13b/Il23a/Ptpn6/Nckap1l/Arid5a/Hlx/Tap2/Cd74/H2-Q4/H2-K1/H2-T23/Ripk3/Svep1	15
GO:0010596	negative regulation of endothelial cell migration	7/627	37/11457	0.00347663	0.028301	0.0210802	Tbxa2r/Acvrl1/Dab2ip/Thbs1/Dcn/Slit2/Stc1	7
GO:0032715	negative regulation of interleukin-6 production	6/627	28/11457	0.0035116	0.0283469	0.0211144	Nlrp12/Bank1/Ptpn6/Nr1h4/Nckap1l/Gas6	6
GO:0048546	digestive tract morphogenesis	6/627	28/11457	0.0035116	0.0283469	0.0211144	Hlx/Tcf7/Stra6/Npr2/Pdgfra/Wnt5a	6
GO:0070098	chemokine-mediated signaling pathway	6/627	28/11457	0.0035116	0.0283469	0.0211144	Cxcl9/Ackr3/Foxc1/Slit3/Entrep1/Slit2	6
GO:2000649	regulation of sodium ion transmembrane transporter activity	6/627	28/11457	0.0035116	0.0283469	0.0211144	Ank3/Fxyd5/Klhl24/Tesc/Plcb1/Cnksr3	6
GO:0006809	nitric oxide biosynthetic process	9/627	57/11457	0.00353658	0.0283469	0.0211144	Cd36/Ulbp1/Nos1/Cav1/Cd34/Igf1/Cyp1b1/Rora/Agt	9
GO:0030500	regulation of bone mineralization	9/627	57/11457	0.00353658	0.0283469	0.0211144	P2rx7/Ptn/Csf1r/Actn3/Osr2/Omd/Enpp1/Notum/Fbn2	9
GO:0033627	cell adhesion mediated by integrin	9/627	57/11457	0.00353658	0.0283469	0.0211144	Lpxn/Itgb4/Ptpn6/Nckap1l/Itgb3/Plpp3/Tesc/Cyp1b1/Itgbl1	9
GO:0070373	negative regulation of ERK1 and ERK2 cascade	9/627	57/11457	0.00353658	0.0283469	0.0211144	Nlrp12/Rgs14/Cav1/Dab2ip/Timp3/Cnksr3/Igf1/Rps6ka6/Fbln1	9
GO:0045137	development of primary sexual characteristics	16/627	138/11457	0.00355098	0.0284078	0.0211598	Ntrk1/Afp/Serpinb6b/Fgf7/Foxc1/Lrp2/Stat5b/Tesc/Npr2/Stat5a/Pdgfra/Ace/Wnt5a/Kdr/Agt/Ar	16
GO:0015837	amine transport	8/627	47/11457	0.00363627	0.0290163	0.021613	P2rx7/Rgs4/Syt1/Cacna1a/Sv2a/Rgs2/Agt/Avpr1a	8
GO:0043270	positive regulation of monoatomic ion transport	15/627	126/11457	0.00364094	0.0290163	0.021613	P2rx7/Cxcl9/Nos1/Atp2c2/Cacng8/Cav1/Ank3/Tesc/Cacna1c/Cacna2d1/Stac2/Plcb1/Cnksr3/Kcnj2/Stc1	15
GO:0009612	response to mechanical stimulus	11/627	79/11457	0.00366241	0.0291174	0.0216884	Ntrk1/P2rx7/Ptn/Nos1/Lck/Pkd1l1/Cav1/Stra6/Thbs1/Fos/Igf1	11
GO:0051153	regulation of striated muscle cell differentiation	10/627	68/11457	0.00367939	0.0291174	0.0216884	Ccnd2/Rgs4/Hopx/Csf1r/Actn3/Bdnf/Plpp7/Rgs2/Nrg1/Igf1	10
GO:0060349	bone morphogenesis	10/627	68/11457	0.00367939	0.0291174	0.0216884	Actn3/Foxc1/Axin2/Osr2/Npr2/Thbs1/Rarb/Enpp1/Stc1/Sp5	10
GO:0002822	regulation of adaptive immune response based on somatic recombination of immune receptors built from immunoglobulin superfamily domains	14/627	114/11457	0.00368152	0.0291174	0.0216884	P2rx7/Ulbp1/Tnfsf13b/Il23a/Ptpn6/Nckap1l/Arid5a/Hlx/Tap2/H2-Q4/H2-K1/H2-T23/Ripk3/Svep1	14
GO:0032309	icosanoid secretion	5/627	20/11457	0.00376724	0.0296271	0.022068	P2rx7/Pla2r1/Ptges/Bdkrb2/Ace	5
GO:0035115	embryonic forelimb morphogenesis	5/627	20/11457	0.00376724	0.0296271	0.022068	Osr2/Cacna1c/Wnt9a/Alx3/Alx4	5
GO:0046885	regulation of hormone biosynthetic process	5/627	20/11457	0.00376724	0.0296271	0.022068	Bmp5/Pde8b/Cacna1a/Igf1/Stc2	5
GO:0006813	potassium ion transport	12/627	91/11457	0.00388061	0.0304614	0.0226894	Rgs4/Nos1/Kcnn4/Slc9a9/Cav1/Ank3/Klhl24/Kcnt2/Kcnn1/Kcnip3/Nalcn/Kcnj2	12
GO:0035051	cardiocyte differentiation	15/627	127/11457	0.00392647	0.0307635	0.0229144	Ccnd2/Adra1b/Rgs4/Nrap/Cavin4/Isl1/Pdgfra/Tbx2/Rgs2/Rarb/Nrg1/Tbx18/Hes1/Igf1/Agt	15
GO:1904892	regulation of receptor signaling pathway via STAT	9/627	58/11457	0.00398812	0.031188	0.0232306	Il23a/Mst1/Cav1/Bcl3/Ghr/Stra6/Hes1/Cyp1b1/Agt	9
GO:0017156	calcium-ion regulated exocytosis	7/627	38/11457	0.00406474	0.0316685	0.0235886	Snap25/P2rx7/Syt1/Unc13d/Rapgef4/Cacna1a/Cacna1c	7
GO:0031952	regulation of protein autophosphorylation	7/627	38/11457	0.00406474	0.0316685	0.0235886	Nlrp12/Cav1/Pdgfa/Nrg1/Ace/Enpp1/Vegfc	7
GO:0033993	response to lipid	39/627	459/11457	0.00409697	0.0316894	0.0236041	Cd36/Cxcl16/Adra1b/P2rx7/Tbxa2r/Cxcl9/Gpld1/Nos1/Spp1/Casp1/Nr1h4/Arid5a/Isl1/Areg/Map4k1/Cav1/Bdnf/Dab2ip/Crebrf/Pid1/Fbxo32/Zfp36l1/Ghr/Ces1a/Stat5b/Tesc/Tnip3/Tbx2/Plcb1/Peg13/Igf1/Ace/Lpar1/Ptgfr/Cfh/Rora/Lox/Adm/Ar	39
GO:0030048	actin filament-based movement	10/627	69/11457	0.00409777	0.0316894	0.0236041	Limch1/Acta2/Nos1/Vil1/Myo1g/Cav1/Cacna1c/Cacna2d1/Kcnj2/Stc1	10
GO:0032652	regulation of interleukin-1 production	10/627	69/11457	0.00409777	0.0316894	0.0236041	Cd36/Nlrp12/P2rx7/Ifi213/Casp1/Nr1h4/Isl1/Igf1/Gas6/Wnt5a	10
GO:0071675	regulation of mononuclear cell migration	10/627	69/11457	0.00409777	0.0316894	0.0236041	Csf1r/Pla2g7/Csf1/Itgb3/Thbs1/Plcb1/Gas6/Wnt5a/Ripk3/Slit2	10
GO:0002707	negative regulation of lymphocyte mediated immunity	6/627	29/11457	0.00422658	0.0322564	0.0240264	Ptpn6/Nckap1l/Tap2/Serpinb9b/Tap1/Svep1	6
GO:0007200	phospholipase C-activating G protein-coupled receptor signaling pathway	6/627	29/11457	0.00422658	0.0322564	0.0240264	Adra1b/Ano1/Npr3/Plcb1/Adra1d/Lpar1	6
GO:0019748	secondary metabolic process	6/627	29/11457	0.00422658	0.0322564	0.0240264	As3mt/Bdh2/Mc1r/Akr1c14/Cyp1b1/Wnt5a	6
GO:0043114	regulation of vascular permeability	6/627	29/11457	0.00422658	0.0322564	0.0240264	Ocln/Akap12/Ramp2/Ptp4a3/Slit2/Adm	6
GO:0051154	negative regulation of striated muscle cell differentiation	6/627	29/11457	0.00422658	0.0322564	0.0240264	Ccnd2/Rgs4/Csf1r/Bdnf/Plpp7/Rgs2	6
GO:0070665	positive regulation of leukocyte proliferation	12/627	92/11457	0.00424716	0.0322564	0.0240264	Rasal3/Tnfsf13b/Il23a/Csf1r/Nckap1l/Csf1/Cd74/Stat5b/Stat5a/Cdkn1a/Hes1/Igf1	12
GO:0001911	negative regulation of leukocyte mediated cytotoxicity	4/627	13/11457	0.0042715	0.0322564	0.0240264	Nckap1l/Tap2/Serpinb9b/Tap1	4
GO:0003084	positive regulation of systemic arterial blood pressure	4/627	13/11457	0.0042715	0.0322564	0.0240264	Adra1b/Ace/Agt/Avpr1a	4
GO:0043116	negative regulation of vascular permeability	4/627	13/11457	0.0042715	0.0322564	0.0240264	Akap12/Ramp2/Slit2/Adm	4
GO:0045579	positive regulation of B cell differentiation	4/627	13/11457	0.0042715	0.0322564	0.0240264	Il2rg/Nckap1l/Stat5b/Stat5a	4
GO:0048791	calcium ion-regulated exocytosis of neurotransmitter	4/627	13/11457	0.0042715	0.0322564	0.0240264	Snap25/P2rx7/Syt1/Cacna1a	4
GO:0061450	trophoblast cell migration	4/627	13/11457	0.0042715	0.0322564	0.0240264	Itgb4/Arhgdib/Itgb3/Fbn2	4
GO:2000291	regulation of myoblast proliferation	4/627	13/11457	0.0042715	0.0322564	0.0240264	Fgf7/Csf1r/Tbx18/Igf1	4
GO:0046649	lymphocyte activation	40/627	476/11457	0.00443922	0.0334624	0.0249248	Crtam/Ntrk1/Rasal3/Gimap1/Dock10/P2rx7/Ulbp1/Tnfsf13b/Batf/Il23a/Unc13d/Duxbl1/Lck/Bank1/Csf1r/Ptpn6/Il2rg/Nckap1l/Mfng/Cav1/Bcl3/Nfil3/Hlx/Zfp608/Zfp36l1/Wdfy4/Cd74/Tcf7/Stat5b/Stat5a/Cdkn1a/Hes1/Igf1/Gas6/Sox12/Ripk3/Hmgb3/Cdh26/Enpp1/Rora	40
GO:0019882	antigen processing and presentation	9/627	59/11457	0.0044835	0.0337335	0.0251267	Ulbp1/Tap2/Wdfy4/Cd74/Thbs1/H2-Q4/H2-K1/Tap1/H2-T23	9
GO:0030308	negative regulation of cell growth	17/627	154/11457	0.00449134	0.0337335	0.0251267	Rgs4/Acvrl1/Hspa1a/Rrad/Dab2ip/Sema4g/Rgs2/Slit3/Cdkn1a/Prdm11/Ntn1/Sema3f/Wnt5a/Slit2/Rerg/Enpp1/Agt	17
GO:0010810	regulation of cell-substrate adhesion	18/627	167/11457	0.00453247	0.0339813	0.0253112	Cd36/Epha1/Kank1/Limch1/Ptn/Cass4/Unc13d/Acvrl1/Spp1/Ccdc80/Smoc1/Csf1/Itgb3/Thbs1/Postn/Fbln1/Kdr/Nid1	18
GO:0042742	defense response to bacterium	14/627	117/11457	0.00466123	0.0348841	0.0259837	Cd36/Mbl2/P2rx7/Il23a/Trf/Casp1/Nr1h4/Slc9a9/Bcl3/Emilin2/H2-K1/Optn/Adm/Colec12	14
GO:0048168	regulation of neuronal synaptic plasticity	7/627	39/11457	0.0047252	0.0349598	0.0260401	Zdhhc2/Bdnf/Grik2/Cpeb1/Synpo/Kdr/Agt	7
GO:0055117	regulation of cardiac muscle contraction	7/627	39/11457	0.0047252	0.0349598	0.0260401	Adra1b/Ccn2/Cav1/Cacna1c/Rgs2/Kcnj2/Stc1	7
GO:0010574	regulation of vascular endothelial growth factor production	5/627	21/11457	0.00472533	0.0349598	0.0260401	Hc/Isl1/Flt1/Cyp1b1/Rora	5
GO:0033688	regulation of osteoblast proliferation	5/627	21/11457	0.00472533	0.0349598	0.0260401	Itgb3/Axin2/Npr3/Fbln5/Cthrc1	5
GO:0035116	embryonic hindlimb morphogenesis	5/627	21/11457	0.00472533	0.0349598	0.0260401	Osr2/Aff3/Alx3/Rarb/Alx4	5
GO:0048169	regulation of long-term neuronal synaptic plasticity	5/627	21/11457	0.00472533	0.0349598	0.0260401	Bdnf/Grik2/Synpo/Kdr/Agt	5
GO:0014911	positive regulation of smooth muscle cell migration	8/627	49/11457	0.00473832	0.0349598	0.0260401	Rapgef4/Itgb3/Stat5b/Igf1/Lpar1/Cyp1b1/Postn/Agt	8
GO:0060761	negative regulation of response to cytokine stimulus	8/627	49/11457	0.00473832	0.0349598	0.0260401	Sigirr/Nr1h4/Cav1/Ptprf/Slit3/Gas6/Slit2/Ccdc3	8
GO:0048738	cardiac muscle tissue development	18/627	168/11457	0.00482591	0.0355432	0.0264747	Ccnd2/Bmp5/Adra1b/Rgs4/Nrap/Cavin4/Isl1/Foxc1/Lrp2/Pdgfra/Tbx2/Rgs2/Rarb/Nrg1/Tbx18/Igf1/Wnt5a/Agt	18
GO:0007613	memory	11/627	82/11457	0.00489613	0.0359969	0.0268126	Ccnd2/Musk/Snap25/Ptn/Casp1/Rgs14/Bdnf/Plcb1/Nrg1/Igf1/Rcan2	11
GO:0035418	protein localization to synapse	9/627	60/11457	0.00502552	0.0366433	0.027294	Pclo/Mapk10/Snap25/Clstn3/Dlg2/Rapgef4/Zdhhc2/Stau2/Nsg1	9
GO:0046209	nitric oxide metabolic process	9/627	60/11457	0.00502552	0.0366433	0.027294	Cd36/Ulbp1/Nos1/Cav1/Cd34/Igf1/Cyp1b1/Rora/Agt	9
GO:0032412	regulation of monoatomic ion transmembrane transporter activity	16/627	143/11457	0.00504234	0.0366433	0.027294	Hpca/Prrt1/Cabp1/Cacng8/Cav1/Ank3/Rrad/Fxyd5/Cacna1a/Klhl24/Tesc/Cacna2d1/Gem/Stac2/Plcb1/Cnksr3	16
GO:1905521	regulation of macrophage migration	6/627	30/11457	0.00504358	0.0366433	0.027294	Hc/Mst1/Csf1r/Mmp28/Csf1/Thbs1	6
GO:0032612	interleukin-1 production	10/627	71/11457	0.00504676	0.0366433	0.027294	Cd36/Nlrp12/P2rx7/Ifi213/Casp1/Nr1h4/Isl1/Igf1/Gas6/Wnt5a	10
GO:0007612	learning	12/627	94/11457	0.00506341	0.0366433	0.027294	Snap25/Adra1b/Ptn/Pde8b/Rgs14/Bdnf/Btg2/Stra6/Cacna1c/Peg13/Synpo/Agt	12
GO:0030326	embryonic limb morphogenesis	12/627	94/11457	0.00506341	0.0366433	0.027294	Prrx1/Osr2/Aff3/Cacna1c/Wnt9a/Tbx2/Alx3/Rarb/Wnt5a/Ror2/Alx4/Fbn2	12
GO:0032368	regulation of lipid transport	12/627	94/11457	0.00506341	0.0366433	0.027294	P2rx7/Pla2r1/Spp1/Osbpl6/Cav1/Itgb3/C1qtnf1/Ptges/Ces1a/Thbs1/Nrg1/Agt	12
GO:0035113	embryonic appendage morphogenesis	12/627	94/11457	0.00506341	0.0366433	0.027294	Prrx1/Osr2/Aff3/Cacna1c/Wnt9a/Tbx2/Alx3/Rarb/Wnt5a/Ror2/Alx4/Fbn2	12
GO:0002696	positive regulation of leukocyte activation	22/627	222/11457	0.0050718	0.0366433	0.027294	Rasal3/Ulbp1/Tnfsf13b/Il23a/Lck/Csf1r/Gata2/Il2rg/Nckap1l/Cav1/Hlx/Cd74/Stat5b/Thbs1/Stat5a/Cdkn1a/Hes1/Igf1/Gas6/Sox12/Wnt5a/Cebpa	22
GO:0050671	positive regulation of lymphocyte proliferation	11/627	83/11457	0.00537349	0.0387559	0.0288677	Rasal3/Tnfsf13b/Il23a/Csf1r/Nckap1l/Cd74/Stat5b/Stat5a/Cdkn1a/Hes1/Igf1	11
GO:0015850	organic hydroxy compound transport	16/627	144/11457	0.00539446	0.0387733	0.0288806	Cd36/Mexis/Soat2/Syt1/Nos1/Spp1/Osbpl6/Nr1h4/Cav1/Itgb3/Slc16a3/C1qtnf1/Ces1a/Stra6/Nrg1/Agt	16
GO:0034764	positive regulation of transmembrane transport	16/627	144/11457	0.00539446	0.0387733	0.0288806	P2rx7/Cxcl9/Nos1/Ocln/Cacng8/Cav1/Ank3/Tesc/Cacna1c/Cacna2d1/Stac2/Plcb1/Cnksr3/Igf1/Kcnj2/Agt	16
GO:0034308	primary alcohol metabolic process	7/627	40/11457	0.00546336	0.0390668	0.0290992	Bmp5/Acpp/Hao1/Slc37a2/Akr1c14/Cyp1b1/Aldh1a1	7
GO:0042698	ovulation cycle	7/627	40/11457	0.00546336	0.0390668	0.0290992	Afp/Ptn/Stat5b/Npr2/Stat5a/Pdgfra/Agt	7
GO:0060251	regulation of glial cell proliferation	7/627	40/11457	0.00546336	0.0390668	0.0290992	Ptn/Flt1/Nrg1/Hes1/Igf1/Ntn1/Vegfc	7
GO:1903169	regulation of calcium ion transmembrane transport	13/627	107/11457	0.00552034	0.0394067	0.0293524	Hpca/P2rx7/Cxcl9/Ptpn6/Cabp1/Cav1/Rrad/Cacna1a/Itgb3/Cacna1c/Cacna2d1/Gem/Stac2	13
GO:0051897	positive regulation of protein kinase B signaling	10/627	72/11457	0.00558173	0.0397769	0.0296282	Hcls1/Cass4/Pdgfa/Lrp2/C1qtnf1/Thbs1/Mc1r/Nrg1/Igf1/Gas6	10
GO:0021700	developmental maturation	22/627	224/11457	0.00563476	0.0400865	0.0298587	Srrm4/Scarf1/Adamts12/Dlg2/Gata2/Actn3/Chrdl1/Ank3/Dab2ip/Nfia/Cacna1a/Npr2/Sybu/Plcb1/Hes1/Adgrl1/Igf1/Wnt5a/Kdr/Enpp1/Grb14/Cebpa	22
GO:1902532	negative regulation of intracellular signal transduction	35/627	409/11457	0.00569977	0.0401086	0.0298752	Rasal3/Kank1/Adra1b/Nlrp12/P2rx7/Bank1/Arhgap24/Rgs14/Ptpn6/Nr1h4/Actn3/Cav1/Rtkn2/Dusp9/Cavin3/Ackr3/Dab2ip/Cd74/Tnip3/Bdkrb2/Slc2a10/Thbs1/Timp3/Rgs2/Cnksr3/Igf1/Optn/Lpar1/Rps6ka6/Mmp3/Fbln1/Slit2/Sesn3/Rora/Agt	35
GO:0002478	antigen processing and presentation of exogenous peptide antigen	4/627	14/11457	0.00572431	0.0401086	0.0298752	Tap2/Cd74/H2-K1/Tap1	4
GO:0010863	positive regulation of phospholipase C activity	4/627	14/11457	0.00572431	0.0401086	0.0298752	Flt1/Pdgfra/Lpar1/Agt	4
GO:0036303	lymph vessel morphogenesis	4/627	14/11457	0.00572431	0.0401086	0.0298752	Acvrl1/Foxc1/Svep1/Vegfc	4
GO:0043129	surfactant homeostasis	4/627	14/11457	0.00572431	0.0401086	0.0298752	Mbl2/Adgrf5/Fgf7/Kdr	4
GO:0045745	positive regulation of G protein-coupled receptor signaling pathway	4/627	14/11457	0.00572431	0.0401086	0.0298752	Acpp/Nos1/Itgb3/Necab2	4
GO:0048266	behavioral response to pain	4/627	14/11457	0.00572431	0.0401086	0.0298752	Ntrk1/Cacna1a/Kcnip3/Thbs1	4
GO:0090103	cochlea morphogenesis	4/627	14/11457	0.00572431	0.0401086	0.0298752	Tbx2/Tbx18/Wnt5a/Cthrc1	4
GO:2000831	regulation of steroid hormone secretion	4/627	14/11457	0.00572431	0.0401086	0.0298752	Spp1/C1qtnf1/Nrg1/Agt	4
GO:0032970	regulation of actin filament-based process	27/627	294/11457	0.00579015	0.040502	0.0301682	Epha1/Kank1/Hcls1/Limch1/Acta2/Rgs4/Nos1/Vil1/Csf1r/Add2/Nckap1l/Ccn2/Arhgdib/Cav1/Arap1/Pecam1/Mtss1/Itgb3/Cacna1c/Daam2/Pdlim4/Stau2/Synpo/Lpar1/Kcnj2/Slit2/Stc1	27
GO:0051146	striated muscle cell differentiation	21/627	211/11457	0.00580802	0.040559	0.0302107	Ccnd2/Adra1b/Rgs4/Nrap/Cxcl9/Cavin4/Hopx/Csf1r/Casp1/Isl1/Actn3/Bdnf/Plpp7/Pdgfra/Rgs2/Rarb/Nrg1/Tbx18/Igf1/Adamts15/Agt	21
GO:0060907	positive regulation of macrophage cytokine production	5/627	22/11457	0.00584448	0.0407455	0.0303496	Cd36/P2rx7/Casp1/Cd74/Wnt5a	5
GO:0042446	hormone biosynthetic process	6/627	31/11457	0.0059707	0.0414869	0.0309018	Bmp5/Pde8b/Cacna1a/Dio2/Igf1/Stc2	6
GO:0140353	lipid export from cell	6/627	31/11457	0.0059707	0.0414869	0.0309018	P2rx7/Spp1/C1qtnf1/Ptges/Nrg1/Agt	6
GO:0044089	positive regulation of cellular component biogenesis	33/627	381/11457	0.00598374	0.0415084	0.0309179	Ntrk1/Cd36/Epha1/Limch1/Musk/P2rx7/Clstn3/Hspa1a/Vil1/Hopx/Nckap1l/Ccn2/Cav1/Bdnf/Dab2ip/Thbs2/Dnm3/Arap1/Mtss1/Bmf/Dpysl3/Adgrl2/Pdlim4/Stau2/Nrg1/Adgrl1/Synpo/Lpar1/Adgre5/Mmp3/Auts2/Kdr/Agt	33
GO:0042472	inner ear morphogenesis	8/627	51/11457	0.00607985	0.0420355	0.0313105	Gata2/Prrx1/Tbx2/Tbx18/Ntn1/Wnt5a/Cthrc1/Ror2	8
GO:1903036	positive regulation of response to wounding	8/627	51/11457	0.00607985	0.0420355	0.0313105	Cd36/Kank1/Ptn/Tbxa2r/Scarf1/Thbs1/Nrg1/Emilin2	8
GO:1905114	cell surface receptor signaling pathway involved in cell-cell signaling	32/627	367/11457	0.00611648	0.0422189	0.0314471	Kank1/Pclo/Cxxc4/Rgs4/Tmem88/Anks1b/Isl1/Cav1/Bdnf/Wnt10a/Dab2ip/Plpp3/Axin2/Tle2/Tcf7/Grik2/Wnt9a/Daam2/Igsf11/Tbx18/Apcdd1/Bicc1/Gria3/Pygo1/Wnt5a/Mark1/Cthrc1/Enpp1/Ror2/Notum/Nid1/Nkd2	32
GO:0042113	B cell activation	18/627	172/11457	0.00615992	0.0424486	0.0316181	Ntrk1/Gimap1/Dock10/Tnfsf13b/Batf/Bank1/Ptpn6/Il2rg/Nckap1l/Mfng/Bcl3/Zfp36l1/Cd74/Stat5b/Stat5a/Cdkn1a/Hmgb3/Enpp1	18
GO:0007159	leukocyte cell-cell adhesion	22/627	226/11457	0.00624838	0.0429536	0.0319943	Crtam/Rasal3/Tnfsf13b/Il23a/Lck/Add2/Ptpn6/Il2rg/Nckap1l/Cav1/Hlx/Pecam1/Zfp608/Cd74/Stat5b/Thbs1/Stat5a/Hes1/Igf1/Podxl2/Sox12/Cfh	22
GO:2001057	reactive nitrogen species metabolic process	9/627	62/11457	0.00626088	0.0429536	0.0319943	Cd36/Ulbp1/Nos1/Cav1/Cd34/Igf1/Cyp1b1/Rora/Agt	9
GO:1901615	organic hydroxy compound metabolic process	28/627	310/11457	0.00626885	0.0429536	0.0319943	Bmp5/Acpp/Ctsk/Soat2/Hao1/Iyd/Nr1h4/Cubn/Tph1/Sult2b1/Actn3/Slc37a2/Synj2/Plpp3/Lrp2/Ces1a/Mc1r/Dio2/Akr1c14/Plcb1/Ephx1/Cyp1b1/Wnt5a/Aldh1a1/Pctp/Sncaip/Enpp1/Cebpa	28
GO:0032720	negative regulation of tumor necrosis factor production	7/627	41/11457	0.00628463	0.0429536	0.0319943	Ptpn6/Nr1h4/Bcl3/Cd34/Mc1r/Igf1/Gas6	7
GO:2000648	positive regulation of stem cell proliferation	7/627	41/11457	0.00628463	0.0429536	0.0319943	Dppa2/Prrx1/Osr2/Tbx18/Wnt5a/Kdr/Vegfc	7
GO:0060485	mesenchyme development	20/627	199/11457	0.0062964	0.0429637	0.0320018	Bmp5/Dppa2/Acvrl1/Isl1/Wnt10a/Dab2ip/Foxc1/Axin2/Bnc2/Zfp36l1/Thbs1/Sema4g/Timp3/Tbx2/Radil/Hes1/Lama5/Sema3f/Wnt5a/Mark1	20
GO:0034446	substrate adhesion-dependent cell spreading	11/627	85/11457	0.00643801	0.0438583	0.0326682	Epha1/Kank1/Cass4/Unc13d/Lpxn/Itgb3/Lamb1/Radil/Lama5/Postn/Fbln1	11
GO:0032675	regulation of interleukin-6 production	12/627	97/11457	0.00651721	0.0442535	0.0329625	Cd36/Nlrp12/P2rx7/Bank1/Ptpn6/Nr1h4/Nckap1l/Arid5a/Isl1/Cd74/Gas6/Wnt5a	12
GO:0098739	import across plasma membrane	12/627	97/11457	0.00651721	0.0442535	0.0329625	Cd36/Rgs4/Slc9a9/Cav1/Cacna1a/Lrp2/Cacna1c/Slc2a10/Thbs1/Rgs2/Kcnj2/Agt	12
GO:0051047	positive regulation of secretion	22/627	227/11457	0.00657521	0.0445748	0.0332019	Snap25/P2rx7/Ano1/Pla2r1/Gpld1/Syt1/Unc13d/Kcnn4/Spp1/Gata2/Nr1h4/Rapgef4/Isl1/C1qtnf1/Ptges/Cacna1c/Sybu/Plcb1/Igf1/Agt/Avpr1a/Vegfc	22
GO:0010634	positive regulation of epithelial cell migration	14/627	122/11457	0.00675427	0.0457145	0.0340508	Gpld1/Vil1/Fgf7/Col18a1/Gata2/Itgb3/Plpp3/Thbs1/Stat5a/Igf1/Wnt5a/Kdr/Agt/Vegfc	14
GO:0060070	canonical Wnt signaling pathway	21/627	214/11457	0.00680759	0.0459443	0.034222	Kank1/Tmem88/Isl1/Cav1/Wnt10a/Dab2ip/Plpp3/Axin2/Tle2/Tcf7/Wnt9a/Daam2/Tbx18/Bicc1/Pygo1/Wnt5a/Cthrc1/Ror2/Notum/Nid1/Nkd2	21
GO:0015833	peptide transport	19/627	187/11457	0.00681023	0.0459443	0.034222	Pclo/Snap25/Ano1/Gpld1/Nos1/Pde8b/Nr1h4/Rapgef4/Isl1/Tap2/Cd74/Gnao1/Cacna1c/Dio2/Sybu/Plcb1/Tap1/Agt/Tfap2b	19
GO:0001823	mesonephros development	8/627	52/11457	0.00685005	0.04599	0.034256	Bdnf/Foxc1/Osr2/Rarb/Hes1/Lama5/Slit2/Agt	8
GO:0007589	body fluid secretion	8/627	52/11457	0.00685005	0.04599	0.034256	Ano1/Kcnn4/Slc4a5/Cav1/Stat5b/Stat5a/Npr3/Enpp1	8
GO:0060411	cardiac septum morphogenesis	8/627	52/11457	0.00685005	0.04599	0.034256	Bmp5/Isl1/Lrp2/Tbx2/Slit3/Hes1/Wnt5a/Slit2	8
GO:0022602	ovulation cycle process	6/627	32/11457	0.00701602	0.0469534	0.0349736	Afp/Stat5b/Npr2/Stat5a/Pdgfra/Agt	6
GO:1900271	regulation of long-term synaptic potentiation	6/627	32/11457	0.00701602	0.0469534	0.0349736	Ptn/Nos1/Zdhhc2/Igsf11/Nsg1/Mme	6
GO:0097553	calcium ion transmembrane import into cytosol	11/627	86/11457	0.00702883	0.0469638	0.0349814	P2rx7/Cxcl9/Lck/Ptpn6/Ccn2/Cav1/Cacna1a/Itgb3/Cacna1c/Cacna2d1/Plcb1	11
GO:0034763	negative regulation of transmembrane transport	12/627	98/11457	0.00706894	0.0471564	0.0351248	Rgs4/Nos1/Cabp1/Cav1/Ank3/Rrad/Pid1/Thbs1/Gem/Rgs2/Ace/Enpp1	12
GO:0002053	positive regulation of mesenchymal cell proliferation	5/627	23/11457	0.00713792	0.0472393	0.0351865	Prrx1/Pdgfa/Tbx18/Wnt5a/Kdr	5
GO:0010518	positive regulation of phospholipase activity	5/627	23/11457	0.00713792	0.0472393	0.0351865	Hpca/Flt1/Pdgfra/Lpar1/Agt	5
GO:0010573	vascular endothelial growth factor production	5/627	23/11457	0.00713792	0.0472393	0.0351865	Hc/Isl1/Flt1/Cyp1b1/Rora	5
GO:0032816	positive regulation of natural killer cell activation	5/627	23/11457	0.00713792	0.0472393	0.0351865	Ulbp1/Il23a/Stat5b/Stat5a/Gas6	5
GO:0060252	positive regulation of glial cell proliferation	5/627	23/11457	0.00713792	0.0472393	0.0351865	Flt1/Nrg1/Igf1/Ntn1/Vegfc	5
GO:1903532	positive regulation of secretion by cell	21/627	215/11457	0.0071705	0.0473133	0.0352417	Snap25/P2rx7/Ano1/Gpld1/Syt1/Unc13d/Kcnn4/Spp1/Gata2/Nr1h4/Rapgef4/Isl1/C1qtnf1/Ptges/Cacna1c/Sybu/Plcb1/Igf1/Agt/Avpr1a/Vegfc	21
GO:0006805	xenobiotic metabolic process	7/627	42/11457	0.00719444	0.0473133	0.0352417	As3mt/Nos1/Akr1c13/Akr1c12/Gsta4/Cyp1b1/Rora	7
GO:0045778	positive regulation of ossification	7/627	42/11457	0.00719444	0.0473133	0.0352417	P2rx7/Ptn/Csf1r/Actn3/Osr2/Wnt5a/Fbn2	7
GO:1903556	negative regulation of tumor necrosis factor superfamily cytokine production	7/627	42/11457	0.00719444	0.0473133	0.0352417	Ptpn6/Nr1h4/Bcl3/Cd34/Mc1r/Igf1/Gas6	7
GO:0043405	regulation of MAP kinase activity	15/627	136/11457	0.00741118	0.0483064	0.0359814	P2rx7/Rgs14/Ptpn6/Cav1/Pdgfa/Dab2ip/Ghr/Flt1/Thbs1/Rgs2/Tgfa/Tpd52l1/Wnt5a/Ror2/Agt	15
GO:0010742	macrophage derived foam cell differentiation	4/627	15/11457	0.00747268	0.0483064	0.0359814	Cd36/Csf1/Itgb3/Agt	4
GO:0031342	negative regulation of cell killing	4/627	15/11457	0.00747268	0.0483064	0.0359814	Nckap1l/Tap2/Serpinb9b/Tap1	4
GO:0032148	activation of protein kinase B activity	4/627	15/11457	0.00747268	0.0483064	0.0359814	Nrg1/Igf1/Gas6/Wnt5a	4
GO:0032891	negative regulation of organic acid transport	4/627	15/11457	0.00747268	0.0483064	0.0359814	Rgs4/Pla2r1/Thbs1/Rgs2	4
GO:0042104	positive regulation of activated T cell proliferation	4/627	15/11457	0.00747268	0.0483064	0.0359814	Il23a/Stat5b/Stat5a/Igf1	4
GO:0060749	mammary gland alveolus development	4/627	15/11457	0.00747268	0.0483064	0.0359814	Tph1/Areg/Tgfa/Ar	4
GO:0061377	mammary gland lobule development	4/627	15/11457	0.00747268	0.0483064	0.0359814	Tph1/Areg/Tgfa/Ar	4
GO:0086002	cardiac muscle cell action potential involved in contraction	4/627	15/11457	0.00747268	0.0483064	0.0359814	Cav1/Cacna1c/Cacna2d1/Kcnj2	4
GO:0086065	cell communication involved in cardiac conduction	4/627	15/11457	0.00747268	0.0483064	0.0359814	Cav1/Cacna1c/Cacna2d1/Tbx18	4
GO:0110110	positive regulation of animal organ morphogenesis	4/627	15/11457	0.00747268	0.0483064	0.0359814	Csf1/Cd34/Wnt5a/Ar	4
GO:0046631	alpha-beta T cell activation	13/627	111/11457	0.0075045	0.0484371	0.0360787	Crtam/Rasal3/Gimap1/Batf/Il23a/Il2rg/Nckap1l/Bcl3/Hlx/Wdfy4/Tcf7/Cdh26/Rora	13
GO:0051249	regulation of lymphocyte activation	27/627	300/11457	0.00753196	0.0485393	0.0361549	Crtam/Rasal3/Ulbp1/Tnfsf13b/Il23a/Duxbl1/Lck/Bank1/Csf1r/Ptpn6/Il2rg/Nckap1l/Cav1/Hlx/Zfp608/Zfp36l1/Cd74/Tcf7/Stat5b/Stat5a/Cdkn1a/Hes1/Igf1/Gas6/Sox12/Ripk3/Hmgb3	27
GO:0046879	hormone secretion	21/627	216/11457	0.00754906	0.0485745	0.0361811	Pclo/Snap25/Ano1/Gpld1/Nos1/Pde8b/Spp1/Nr1h4/Rapgef4/Isl1/Lrp2/C1qtnf1/Gnao1/Cacna1c/Dio2/Sybu/Plcb1/Nrg1/Agt/Adm/Tfap2b	21
GO:0090101	negative regulation of transmembrane receptor protein serine/threonine kinase signaling pathway	12/627	99/11457	0.00765677	0.0489645	0.0364716	Cav1/Chrdl1/Ltbp1/Lrp2/Slc2a10/Rasl11b/Htra1/Fstl3/Wnt5a/Eid2/Aspn/Fbn2	12
GO:0050864	regulation of B cell activation	11/627	87/11457	0.00766117	0.0489645	0.0364716	Tnfsf13b/Bank1/Ptpn6/Il2rg/Nckap1l/Zfp36l1/Cd74/Stat5b/Stat5a/Cdkn1a/Hmgb3	11
GO:1902414	protein localization to cell junction	11/627	87/11457	0.00766117	0.0489645	0.0364716	Pclo/Mapk10/Snap25/Clstn3/Dlg2/Rapgef4/Zdhhc2/Pecam1/Stau2/Nsg1/Nectin3	11
GO:0031347	regulation of defense response	36/627	432/11457	0.00768661	0.0489645	0.0364716	Crtam/Cd36/Mbl2/Nlrp12/Ulbp1/Il23a/Adamts12/Ifi213/Hspa1a/Csf1r/Casp1/Gpsm3/Nr1h4/Isl1/Cav1/Dab2ip/Tap2/Serpinb9b/Cd74/Ptges/Stat5b/Tnip3/Stat5a/Htra1/Emilin2/Igf1/Ace/Optn/Tap1/Wnt5a/Cfh/Slit2/Rora/Cebpa/Agt/Colec12	36
GO:0032233	positive regulation of actin filament bundle assembly	8/627	53/11457	0.00769175	0.0489645	0.0364716	Epha1/Limch1/Vil1/Ccn2/Mtss1/Pdlim4/Synpo/Lpar1	8
GO:0033555	multicellular organismal response to stress	8/627	53/11457	0.00769175	0.0489645	0.0364716	Ntrk1/Nos1/Pde8b/Bdnf/Cacna1a/Kcnip3/Thbs1/Grik2	8
GO:0060395	SMAD protein signal transduction	8/627	53/11457	0.00769175	0.0489645	0.0364716	Bmp5/Afp/Trf/Slc2a10/Fos/Rbpms/Ror2/Gdf10	8
GO:0120039	plasma membrane bounded cell projection morphogenesis	39/627	477/11457	0.0077095	0.0490029	0.0365002	Ntrk1/Kank1/Dock10/Ptn/Syt1/Vil1/Csf1r/Ngef/Nckap1l/Lifr/Arhgef28/Isl1/Bdnf/Ank3/Dab2ip/Dnm3/Cacna1a/Ptprf/Obsl1/Lrp2/Rnf157/Olfm1/Npr2/Sema4g/Egr2/Slit3/Stau2/Col25a1/Zswim6/Lama5/Ntn1/Nfib/Sema3f/Crmp1/Wnt5a/Postn/Auts2/Slit2/Kdr	39
GO:0050767	regulation of neurogenesis	28/627	315/11457	0.00774751	0.0491696	0.0366244	Ptn/Nos1/Trf/Csf1r/Gata2/Rgs14/Casz1/Bdnf/Ptprf/Obsl1/Btg2/Lrp2/Flt1/Sema4g/Egr2/Daam2/Stau2/Nrg1/Hes1/Igf1/Ace/Ntn1/Sema3f/Wnt5a/Slit2/Kdr/Mme/Vegfc	28

## Sheet: GO terms for upregulated genes
Category	CategoryID	GO	Description	PARENT_GO	LogP	Enrichment	Z-score	#TotalGeneInLibrary	#GeneInGO	#GeneInHitList	#GeneInGOAndHitList	%InGO	STDV %InGO	GeneID	Hits	Log(q-value)	GeneList
GO Biological Processes	19	GO:0007167	enzyme-linked receptor protein signaling pathway	19_GO:0023052 signaling	-8.1	3.5	7.3	20836	636	260	28	11	1.9	11482|11576|11839|12064|12160|12826|12977|12978|13835|14178|14219|14756|16818|16880|18198|18211|18590|22041|22349|51791|53972|77531|83453|107321|110542|268977|320664|320679	Acvrl1|Afp|Areg|Bdnf|Bmp5|Col4a1|Csf1|Csf1r|Epha1|Fgf7|Ccn2|Gpld1|Lck|Lifr|Musk|Ntrk1|Pdgfa|Trf|Vil1|Rgs14|Ngef|Anks1b|Chrdl1|Lpxn|Amhr2|Ltbp1|Cass4|Samd12	-3.8	MyList
GO Biological Processes	19	GO:0007169	transmembrane receptor protein tyrosine kinase signaling pathway	19_GO:0023052 signaling	-6.3	3.9	6.5	20836	392	260	19	7.3	1.6	11839|12064|12826|12977|12978|13835|14178|14219|14756|16818|18198|18211|18590|22349|51791|53972|77531|320664|320679	Areg|Bdnf|Col4a1|Csf1|Csf1r|Epha1|Fgf7|Ccn2|Gpld1|Lck|Musk|Ntrk1|Pdgfa|Vil1|Rgs14|Ngef|Anks1b|Cass4|Samd12	-2.3	MyList
Reactome Gene Sets	6	R-MMU-9013148	CDC42 GTPase cycle		-6	8.6	7.8	20836	84	260	9	3.5	1.1	11857|12389|23853|53972|210293|219140|231532|236920|259302	Arhgdib|Cav1|Def6|Ngef|Dock10|Spata13|Arhgap24|Stard8|Srgap3	-2.2	MyList
GO Biological Processes	19	GO:0050730	regulation of peptidyl-tyrosine phosphorylation	19_GO:0008152 metabolic process	-5.8	4.5	6.4	20836	270	260	15	5.8	1.4	11839|12389|12491|12978|14178|15163|15170|16392|16818|18198|18590|66610|83430|242248|320664	Areg|Cav1|Cd36|Csf1r|Fgf7|Hcls1|Ptpn6|Isl1|Lck|Musk|Pdgfa|Abi3|Il23a|Bank1|Cass4	-2.2	MyList
GO Biological Processes	19	GO:0030198	extracellular matrix organization	19_GO:0009987 cellular process	-5.7	4.4	6.3	20836	274	260	15	5.8	1.4	12051|12389|12822|12826|12836|13710|14219|17182|17388|21810|64075|67896|71355|118453|239337	Bcl3|Cav1|Col18a1|Col4a1|Col7a1|Elf3|Ccn2|Matn3|Mmp15|Tgfbi|Smoc1|Ccdc80|Col24a1|Mmp28|Adamts12	-2.2	MyList
GO Biological Processes	19	GO:0045229	external encapsulating structure organization	19_GO:0009987 cellular process	-5.7	4.4	6.3	20836	276	260	15	5.8	1.4	12051|12389|12822|12826|12836|13710|14219|17182|17388|21810|64075|67896|71355|118453|239337	Bcl3|Cav1|Col18a1|Col4a1|Col7a1|Elf3|Ccn2|Matn3|Mmp15|Tgfbi|Smoc1|Ccdc80|Col24a1|Mmp28|Adamts12	-2.2	MyList
GO Biological Processes	19	GO:0043062	extracellular structure organization	19_GO:0009987 cellular process	-5.7	4.4	6.3	20836	276	260	15	5.8	1.4	12051|12389|12822|12826|12836|13710|14219|17182|17388|21810|64075|67896|71355|118453|239337	Bcl3|Cav1|Col18a1|Col4a1|Col7a1|Elf3|Ccn2|Matn3|Mmp15|Tgfbi|Smoc1|Ccdc80|Col24a1|Mmp28|Adamts12	-2.2	MyList
GO Biological Processes	19	GO:0050731	positive regulation of peptidyl-tyrosine phosphorylation	19_GO:0048518 positive regulation of biological process	-5.3	5	6.3	20836	192	260	12	4.6	1.3	11839|12491|12978|14178|15163|16392|16818|18198|66610|83430|242248|320664	Areg|Cd36|Csf1r|Fgf7|Hcls1|Isl1|Lck|Musk|Abi3|Il23a|Bank1|Cass4	-1.9	MyList
GO Biological Processes	19	GO:0002688	regulation of leukocyte chemotaxis	19_GO:0040011 locomotion	-5.2	6	6.5	20836	133	260	10	3.8	1.2	12977|12978|15139|15235|19242|27226|83430|105855|106512|118453	Csf1|Csf1r|Hc|Mst1|Ptn|Pla2g7|Il23a|Nckap1l|Gpsm3|Mmp28	-1.9	MyList
GO Biological Processes	19	GO:0045785	positive regulation of cell adhesion	19_GO:0048518 positive regulation of biological process	-5.1	3.1	5.4	20836	517	260	20	7.7	1.7	11492|11735|12389|12491|12977|13835|15170|15284|16186|16818|19242|20750|24099|64075|67896|70450|83430|105855|320484|320664	Adam19|Ank3|Cav1|Cd36|Csf1|Epha1|Ptpn6|Hlx|Il2rg|Lck|Ptn|Spp1|Tnfsf13b|Smoc1|Ccdc80|Unc13d|Il23a|Nckap1l|Rasal3|Cass4	-1.8	MyList
GO Biological Processes	19	GO:0030036	actin cytoskeleton organization	19_GO:0009987 cellular process	-4.9	3	5.3	20836	530	260	20	7.7	1.7	11474|11519|12954|14178|15163|18175|18590|19201|22041|22349|30785|54132|68016|77569|105855|107351|109042|236920|246177|320664	Actn3|Add2|Cryaa|Fgf7|Hcls1|Nrap|Pdgfa|Pstpip2|Trf|Vil1|Cttnbp2|Pdlim1|Cavin4|Limch1|Nckap1l|Kank1|Cavin3|Stard8|Myo1g|Cass4	-1.7	MyList
GO Biological Processes	19	GO:2000147	positive regulation of cell motility	19_GO:0040011 locomotion	-4.9	2.8	5.2	20836	622	260	22	8.5	1.7	11475|12389|12778|12822|12977|12978|13835|14178|14461|14756|18590|19242|22041|22349|27226|56508|66102|83397|83430|105855|106512|320664	Acta2|Cav1|Ackr3|Col18a1|Csf1|Csf1r|Epha1|Fgf7|Gata2|Gpld1|Pdgfa|Ptn|Trf|Vil1|Pla2g7|Rapgef4|Cxcl16|Akap12|Il23a|Nckap1l|Gpsm3|Cass4	-1.7	MyList
GO Biological Processes	19	GO:0001934	positive regulation of protein phosphorylation	19_GO:0048518 positive regulation of biological process	-4.8	2.6	5	20836	777	260	25	9.6	1.8	11482|11839|12064|12160|12389|12444|12491|12954|12977|12978|14178|14219|15163|16392|16818|18125|18198|18211|18439|18590|66610|77569|83430|242248|320664	Acvrl1|Areg|Bdnf|Bmp5|Cav1|Ccnd2|Cd36|Cryaa|Csf1|Csf1r|Fgf7|Ccn2|Hcls1|Isl1|Lck|Nos1|Musk|Ntrk1|P2rx7|Pdgfa|Abi3|Limch1|Il23a|Bank1|Cass4	-1.7	MyList
GO Biological Processes	19	GO:0045321	leukocyte activation	19_GO:0002376 immune system process	-4.8	2.7	5.1	20836	684	260	23	8.8	1.8	12051|12362|12978|15170|15284|16186|16205|16818|17305|18030|18211|18439|24099|53314|54698|70450|74481|77777|83430|210293|224792|242248|380732	Bcl3|Casp1|Csf1r|Ptpn6|Hlx|Il2rg|Gimap1|Lck|Mfng|Nfil3|Ntrk1|P2rx7|Tnfsf13b|Batf|Crtam|Unc13d|Batf2|Ulbp1|Il23a|Dock10|Adgrf5|Bank1|Milr1	-1.7	MyList
GO Biological Processes	19	GO:0040017	positive regulation of locomotion	19_GO:0040011 locomotion	-4.7	2.8	5.1	20836	639	260	22	8.5	1.7	11475|12389|12778|12822|12977|12978|13835|14178|14461|14756|18590|19242|22041|22349|27226|56508|66102|83397|83430|105855|106512|320664	Acta2|Cav1|Ackr3|Col18a1|Csf1|Csf1r|Epha1|Fgf7|Gata2|Gpld1|Pdgfa|Ptn|Trf|Vil1|Pla2g7|Rapgef4|Cxcl16|Akap12|Il23a|Nckap1l|Gpsm3|Cass4	-1.7	MyList
KEGG Pathway	24	mmu04060	Cytokine-cytokine receptor interaction - Mus musculus (house mouse)		-4.7	3.8	5.5	20836	292	260	14	5.4	1.4	11482|12160|12778|12977|12978|16164|16186|16880|17329|18414|24099|66102|83430|110542	Acvrl1|Bmp5|Ackr3|Csf1|Csf1r|Il13ra1|Il2rg|Lifr|Cxcl9|Osmr|Tnfsf13b|Cxcl16|Il23a|Amhr2	-1.7	MyList
GO Biological Processes	19	GO:0030335	positive regulation of cell migration	19_GO:0040011 locomotion	-4.7	2.8	5.1	20836	595	260	21	8.1	1.7	11475|12389|12778|12822|12977|12978|13835|14178|14461|14756|18590|19242|22349|27226|56508|66102|83397|83430|105855|106512|320664	Acta2|Cav1|Ackr3|Col18a1|Csf1|Csf1r|Epha1|Fgf7|Gata2|Gpld1|Pdgfa|Ptn|Vil1|Pla2g7|Rapgef4|Cxcl16|Akap12|Il23a|Nckap1l|Gpsm3|Cass4	-1.7	MyList
GO Biological Processes	19	GO:0010810	regulation of cell-substrate adhesion	19_GO:0050789 regulation of biological process	-4.5	4.2	5.5	20836	230	260	12	4.6	1.3	11482|12491|12977|13835|19242|20750|64075|67896|70450|77569|107351|320664	Acvrl1|Cd36|Csf1|Epha1|Ptn|Spp1|Smoc1|Ccdc80|Unc13d|Limch1|Kank1|Cass4	-1.5	MyList
GO Biological Processes	19	GO:0048771	tissue remodeling	19_GO:0032501 multicellular organismal process	-4.4	5.5	5.8	20836	132	260	9	3.5	1.1	11482|11548|12389|13038|13710|19242|21990|83430|105246908	Acvrl1|Adra1b|Cav1|Ctsk|Elf3|Ptn|Tph1|Il23a|Chaer1	-1.4	MyList
GO Biological Processes	19	GO:0030029	actin filament-based process	19_GO:0009987 cellular process	-4.3	2.7	4.8	20836	583	260	20	7.7	1.7	11474|11519|12954|14178|15163|18175|18590|19201|22041|22349|30785|54132|68016|77569|105855|107351|109042|236920|246177|320664	Actn3|Add2|Cryaa|Fgf7|Hcls1|Nrap|Pdgfa|Pstpip2|Trf|Vil1|Cttnbp2|Pdlim1|Cavin4|Limch1|Nckap1l|Kank1|Cavin3|Stard8|Myo1g|Cass4	-1.4	MyList
GO Biological Processes	19	GO:0001775	cell activation	19_GO:0032501 multicellular organismal process	-4.3	2.5	4.7	20836	781	260	24	9.2	1.8	11482|12051|12362|12978|15170|15284|16186|16205|16818|17305|18030|18211|18439|24099|53314|54698|70450|74481|77777|83430|210293|224792|242248|380732	Acvrl1|Bcl3|Casp1|Csf1r|Ptpn6|Hlx|Il2rg|Gimap1|Lck|Mfng|Nfil3|Ntrk1|P2rx7|Tnfsf13b|Batf|Crtam|Unc13d|Batf2|Ulbp1|Il23a|Dock10|Adgrf5|Bank1|Milr1	-1.4	MyList
GO Biological Processes	19	GO:0046578	regulation of Ras protein signal transduction	19_GO:0023052 signaling	-4.3	4.3	5.4	20836	204	260	11	4.2	1.2	11548|11857|12977|18211|68016|72318|107351|110596|231532|236920|320484	Adra1b|Arhgdib|Csf1|Ntrk1|Cavin4|Cyth4|Kank1|Arhgef28|Arhgap24|Stard8|Rasal3	-1.3	MyList
GO Biological Processes	19	GO:0010758	regulation of macrophage chemotaxis	19_GO:0040011 locomotion	-4.2	12	7.1	20836	34	260	5	1.9	0.85	12977|12978|15139|15235|118453	Csf1|Csf1r|Hc|Mst1|Mmp28	-1.3	MyList
GO Biological Processes	19	GO:0050778	positive regulation of immune response	19_GO:0002376 immune system process	-4.2	2.6	4.6	20836	648	260	21	8.1	1.7	12362|12389|14461|14756|15139|15170|15284|16534|16818|17195|18439|20186|23880|24099|54698|77777|83430|105855|214855|246177|623121	Casp1|Cav1|Gata2|Gpld1|Hc|Ptpn6|Hlx|Kcnn4|Lck|Mbl2|P2rx7|Nr1h4|Fyb|Tnfsf13b|Crtam|Ulbp1|Il23a|Nckap1l|Arid5a|Myo1g|Ifi213	-1.3	MyList
GO Biological Processes	19	GO:0010811	positive regulation of cell-substrate adhesion	19_GO:0048518 positive regulation of biological process	-4.1	5.1	5.5	20836	142	260	9	3.5	1.1	12491|12977|13835|19242|20750|64075|67896|70450|320664	Cd36|Csf1|Epha1|Ptn|Spp1|Smoc1|Ccdc80|Unc13d|Cass4	-1.3	MyList
GO Biological Processes	19	GO:1903034	regulation of response to wounding	19_GO:0050896 response to stimulus	-4.1	4.6	5.3	20836	176	260	10	3.8	1.2	11475|12389|12491|18590|19242|21390|22349|107351|216350|380713	Acta2|Cav1|Cd36|Pdgfa|Ptn|Tbxa2r|Vil1|Kank1|Tspan8|Scarf1	-1.3	MyList
GO Biological Processes	19	GO:0034330	cell junction organization	19_GO:0009987 cellular process	-4.1	2.7	4.7	20836	557	260	19	7.3	1.6	11474|11519|11735|12064|12826|12978|18198|18260|20186|26875|29867|56863|70546|70598|83453|192897|210293|232370|260297	Actn3|Add2|Ank3|Bdnf|Col4a1|Csf1r|Musk|Ocln|Nr1h4|Pclo|Cabp1|Cldn9|Zdhhc2|Filip1|Chrdl1|Itgb4|Dock10|Clstn3|Prrt1	-1.3	MyList
WikiPathways	27	WP3625	Tyrobp causal network in microglia		-4.1	8.3	6.2	20836	58	260	6	2.3	0.93	15163|15284|16164|20750|66102|105855	Hcls1|Hlx|Il13ra1|Spp1|Cxcl16|Nckap1l	-1.3	MyList
GO Biological Processes	19	GO:0032730	positive regulation of interleukin-1 alpha production	19_GO:0048518 positive regulation of biological process	-4	30	9.2	20836	8	260	3	1.2	0.66	12362|16392|18439	Casp1|Isl1|P2rx7	-1.2	MyList
GO Biological Processes	19	GO:0002521	leukocyte differentiation	19_GO:0032502 developmental process	-3.9	2.8	4.6	20836	481	260	17	6.5	1.5	12051|12977|12978|14461|15284|16186|16205|16818|17305|18030|18211|22041|24099|53314|74481|210293|623121	Bcl3|Csf1|Csf1r|Gata2|Hlx|Il2rg|Gimap1|Lck|Mfng|Nfil3|Ntrk1|Trf|Tnfsf13b|Batf|Batf2|Dock10|Ifi213	-1.1	MyList
Reactome Gene Sets	6	R-MMU-449147	Signaling by Interleukins		-3.9	3.6	4.8	20836	266	260	12	4.6	1.3	12362|12977|12978|15170|16164|16186|16818|16880|18414|20614|26414|83430	Casp1|Csf1|Csf1r|Ptpn6|Il13ra1|Il2rg|Lck|Lifr|Osmr|Snap25|Mapk10|Il23a	-1.1	MyList
Reactome Gene Sets	6	R-MMU-9012999	RHO GTPase cycle		-3.9	3.1	4.6	20836	394	260	15	5.8	1.4	11857|12389|16818|23853|52331|53972|70598|83397|105855|110596|210293|219140|231532|236920|259302	Arhgdib|Cav1|Lck|Def6|Stbd1|Ngef|Filip1|Akap12|Nckap1l|Arhgef28|Dock10|Spata13|Arhgap24|Stard8|Srgap3	-1.1	MyList
GO Biological Processes	19	GO:0001709	cell fate determination	19_GO:0032502 developmental process	-3.8	9.8	6.3	20836	41	260	5	1.9	0.85	14461|16392|18933|74561|83453	Gata2|Isl1|Prrx1|Nkx6-3|Chrdl1	-1.1	MyList
Reactome Gene Sets	6	R-MMU-1474244	Extracellular matrix organization		-3.8	3.8	4.8	20836	231	260	11	4.2	1.2	11492|12822|12826|12836|13038|17182|17388|20750|71355|192897|268977	Adam19|Col18a1|Col4a1|Col7a1|Ctsk|Matn3|Mmp15|Spp1|Col24a1|Itgb4|Ltbp1	-1.1	MyList
KEGG Pathway	24	mmu04151	PI3K-Akt signaling pathway - Mus musculus (house mouse)		-3.7	3.1	4.6	20836	359	260	14	5.4	1.4	11839|12064|12444|12826|12977|12978|14178|14710|16186|18211|18414|18590|20750|192897	Areg|Bdnf|Ccnd2|Col4a1|Csf1|Csf1r|Fgf7|Gngt2|Il2rg|Ntrk1|Osmr|Pdgfa|Spp1|Itgb4	-1	MyList
GO Biological Processes	19	GO:0051154	negative regulation of striated muscle cell differentiation	19_GO:0048519 negative regulation of biological process	-3.7	9.3	6.1	20836	43	260	5	1.9	0.85	12064|12444|12978|19736|227721	Bdnf|Ccnd2|Csf1r|Rgs4|Plpp7	-1	MyList
GO Biological Processes	19	GO:0051056	regulation of small GTPase mediated signal transduction	19_GO:0023052 signaling	-3.7	3.7	4.8	20836	236	260	11	4.2	1.2	11548|11857|12977|18211|68016|72318|107351|110596|231532|236920|320484	Adra1b|Arhgdib|Csf1|Ntrk1|Cavin4|Cyth4|Kank1|Arhgef28|Arhgap24|Stard8|Rasal3	-1	MyList
GO Biological Processes	19	GO:0050865	regulation of cell activation	19_GO:0032501 multicellular organismal process	-3.7	2.4	4.3	20836	699	260	21	8.1	1.7	11475|12389|12978|14219|14461|15170|15284|16186|16818|18590|24099|54698|70450|77777|83430|105855|224792|242248|278672|320484|380732	Acta2|Cav1|Csf1r|Ccn2|Gata2|Ptpn6|Hlx|Il2rg|Lck|Pdgfa|Tnfsf13b|Crtam|Unc13d|Ulbp1|Il23a|Nckap1l|Adgrf5|Bank1|Duxbl1|Rasal3|Milr1	-1	MyList
GO Biological Processes	19	GO:0051602	response to electrical stimulus	19_GO:0050896 response to stimulus	-3.7	13	6.8	20836	24	260	4	1.5	0.76	18198|18211|18439|243548	Musk|Ntrk1|P2rx7|Prickle2	-1	MyList
Reactome Gene Sets	6	R-MMU-9013149	RAC1 GTPase cycle		-3.7	4.4	4.9	20836	163	260	9	3.5	1.1	11857|12389|23853|53972|105855|210293|219140|231532|259302	Arhgdib|Cav1|Def6|Ngef|Nckap1l|Dock10|Spata13|Arhgap24|Srgap3	-1	MyList
GO Biological Processes	19	GO:0002315	marginal zone B cell differentiation	19_GO:0002376 immune system process	-3.7	24	8.2	20836	10	260	3	1.2	0.66	12051|17305|210293	Bcl3|Mfng|Dock10	-1	MyList
GO Biological Processes	19	GO:0046649	lymphocyte activation	19_GO:0002376 immune system process	-3.6	2.6	4.3	20836	556	260	18	6.9	1.6	12051|15170|15284|16186|16205|16818|17305|18030|18211|18439|24099|53314|54698|70450|77777|83430|210293|242248	Bcl3|Ptpn6|Hlx|Il2rg|Gimap1|Lck|Mfng|Nfil3|Ntrk1|P2rx7|Tnfsf13b|Batf|Crtam|Unc13d|Ulbp1|Il23a|Dock10|Bank1	-0.99	MyList
GO Biological Processes	19	GO:0006898	receptor-mediated endocytosis	19_GO:0051179 localization	-3.6	4.4	4.9	20836	165	260	9	3.5	1.1	12389|12491|12778|18779|20614|65969|66102|81905|380713	Cav1|Cd36|Ackr3|Pla2r1|Snap25|Cubn|Cxcl16|Cacng8|Scarf1	-0.99	MyList
GO Biological Processes	19	GO:0042509	regulation of tyrosine phosphorylation of STAT protein	19_GO:0023052 signaling	-3.6	6.8	5.5	20836	71	260	6	2.3	0.93	12389|12978|15163|16392|16818|83430	Cav1|Csf1r|Hcls1|Isl1|Lck|Il23a	-0.96	MyList
Reactome Gene Sets	6	R-MMU-8980692	RHOA GTPase cycle		-3.5	4.8	4.9	20836	134	260	8	3.1	1.1	11857|12389|23853|52331|53972|110596|231532|236920	Arhgdib|Cav1|Def6|Stbd1|Ngef|Arhgef28|Arhgap24|Stard8	-0.96	MyList
GO Biological Processes	19	GO:0001568	blood vessel development	19_GO:0032502 developmental process	-3.5	2.5	4.2	20836	566	260	18	6.9	1.6	11482|12389|12778|12822|12826|13835|14219|14239|14461|14756|18590|18933|68545|110542|224792|231532|268977|381524	Acvrl1|Cav1|Ackr3|Col18a1|Col4a1|Epha1|Ccn2|Foxs1|Gata2|Gpld1|Pdgfa|Prrx1|Ecscr|Amhr2|Adgrf5|Arhgap24|Ltbp1|Mexis	-0.96	MyList
GO Biological Processes	19	GO:0032675	regulation of interleukin-6 production	19_GO:0032501 multicellular organismal process	-3.5	4.2	4.8	20836	170	260	9	3.5	1.1	12491|15170|16392|18439|20186|105855|214855|242248|378425	Cd36|Ptpn6|Isl1|P2rx7|Nr1h4|Nckap1l|Arid5a|Bank1|Nlrp12	-0.96	MyList
GO Biological Processes	19	GO:0002467	germinal center formation	19_GO:0002376 immune system process	-3.5	22	7.8	20836	11	260	3	1.2	0.66	12051|24099|70450	Bcl3|Tnfsf13b|Unc13d	-0.96	MyList
GO Biological Processes	19	GO:0045064	T-helper 2 cell differentiation	19_GO:0002376 immune system process	-3.5	22	7.8	20836	11	260	3	1.2	0.66	12051|15284|53314	Bcl3|Hlx|Batf	-0.96	MyList
GO Biological Processes	19	GO:1900046	regulation of hemostasis	19_GO:0050789 regulation of biological process	-3.5	6.6	5.4	20836	73	260	6	2.3	0.93	12389|12491|18590|21390|21990|216350	Cav1|Cd36|Pdgfa|Tbxa2r|Tph1|Tspan8	-0.96	MyList
GO Biological Processes	19	GO:0001819	positive regulation of cytokine production	19_GO:0048518 positive regulation of biological process	-3.5	2.6	4.2	20836	520	260	17	6.5	1.5	12051|12362|12491|12978|15139|16392|18439|18779|20186|53314|54698|77777|83397|83430|106512|214855|623121	Bcl3|Casp1|Cd36|Csf1r|Hc|Isl1|P2rx7|Pla2r1|Nr1h4|Batf|Crtam|Ulbp1|Akap12|Il23a|Gpsm3|Arid5a|Ifi213	-0.96	MyList
GO Biological Processes	19	GO:0009410	response to xenobiotic stimulus	19_GO:0050896 response to stimulus	-3.5	3.1	4.4	20836	334	260	13	5	1.4	12064|12362|12515|14756|16818|18125|18211|18439|20186|27384|57344|105855|622402	Bdnf|Casp1|Cd69|Gpld1|Lck|Nos1|Ntrk1|P2rx7|Nr1h4|Akr1c13|As3mt|Nckap1l|Akr1c12	-0.96	MyList
GO Biological Processes	19	GO:0061041	regulation of wound healing	19_GO:0050896 response to stimulus	-3.5	4.7	4.9	20836	136	260	8	3.1	1.1	11475|12389|12491|18590|21390|22349|107351|216350	Acta2|Cav1|Cd36|Pdgfa|Tbxa2r|Vil1|Kank1|Tspan8	-0.96	MyList
KEGG Pathway	24	mmu04010	MAPK signaling pathway - Mus musculus (house mouse)		-3.5	3.3	4.4	20836	294	260	12	4.6	1.3	11839|12064|12977|12978|14178|18211|18590|26411|26414|75590|81905|193740	Areg|Bdnf|Csf1|Csf1r|Fgf7|Ntrk1|Pdgfa|Map4k1|Mapk10|Dusp9|Cacng8|Hspa1a	-0.93	MyList
GO Biological Processes	19	GO:0050818	regulation of coagulation	19_GO:0032501 multicellular organismal process	-3.5	6.4	5.3	20836	75	260	6	2.3	0.93	12389|12491|18590|19124|21390|216350	Cav1|Cd36|Pdgfa|Procr|Tbxa2r|Tspan8	-0.93	MyList
GO Biological Processes	19	GO:1905521	regulation of macrophage migration	19_GO:0040011 locomotion	-3.5	8.2	5.7	20836	49	260	5	1.9	0.85	12977|12978|15139|15235|118453	Csf1|Csf1r|Hc|Mst1|Mmp28	-0.93	MyList
GO Biological Processes	19	GO:0002690	positive regulation of leukocyte chemotaxis	19_GO:0040011 locomotion	-3.4	5.3	5	20836	106	260	7	2.7	1	12977|12978|19242|27226|83430|105855|106512	Csf1|Csf1r|Ptn|Pla2g7|Il23a|Nckap1l|Gpsm3	-0.93	MyList
GO Biological Processes	19	GO:0051153	regulation of striated muscle cell differentiation	19_GO:0032502 developmental process	-3.4	5.3	5	20836	106	260	7	2.7	1	11474|12064|12444|12978|19736|74318|227721	Actn3|Bdnf|Ccnd2|Csf1r|Rgs4|Hopx|Plpp7	-0.93	MyList
GO Biological Processes	19	GO:0032650	regulation of interleukin-1 alpha production	19_GO:0032501 multicellular organismal process	-3.4	20	7.4	20836	12	260	3	1.2	0.66	12362|16392|18439	Casp1|Isl1|P2rx7	-0.93	MyList
GO Biological Processes	19	GO:0010649	regulation of cell communication by electrical coupling	19_GO:0050789 regulation of biological process	-3.4	20	7.4	20836	12	260	3	1.2	0.66	11735|12389|29867	Ank3|Cav1|Cabp1	-0.93	MyList
GO Biological Processes	19	GO:1903911	positive regulation of receptor clustering	19_GO:0051179 localization	-3.4	20	7.4	20836	12	260	3	1.2	0.66	18198|19242|70546	Musk|Ptn|Zdhhc2	-0.93	MyList
GO Biological Processes	19	GO:0050808	synapse organization	19_GO:0009987 cellular process	-3.4	3	4.3	20836	342	260	13	5	1.4	11519|11735|12064|12826|18198|26875|29867|70546|70598|83453|210293|232370|260297	Add2|Ank3|Bdnf|Col4a1|Musk|Pclo|Cabp1|Zdhhc2|Filip1|Chrdl1|Dock10|Clstn3|Prrt1	-0.93	MyList
GO Biological Processes	19	GO:1903131	mononuclear cell differentiation	19_GO:0032502 developmental process	-3.4	2.9	4.2	20836	390	260	14	5.4	1.4	12051|12977|15284|16186|16205|16818|17305|18030|18211|24099|53314|74481|210293|623121	Bcl3|Csf1|Hlx|Il2rg|Gimap1|Lck|Mfng|Nfil3|Ntrk1|Tnfsf13b|Batf|Batf2|Dock10|Ifi213	-0.91	MyList
GO Biological Processes	19	GO:0048639	positive regulation of developmental growth	19_GO:0040007 growth	-3.3	3.6	4.4	20836	220	260	10	3.8	1.2	11474|12064|12444|12977|14239|15284|18198|20979|22349|74318	Actn3|Bdnf|Ccnd2|Csf1|Foxs1|Hlx|Musk|Syt1|Vil1|Hopx	-0.87	MyList
Reactome Gene Sets	6	R-MMU-109582	Hemostasis		-3.3	2.6	4.1	20836	491	260	16	6.2	1.5	12491|14461|14710|15170|16818|18125|18439|18573|18590|19124|21346|21390|22041|56508|210293|286942	Cd36|Gata2|Gngt2|Ptpn6|Lck|Nos1|P2rx7|Pde1a|Pdgfa|Procr|Tagln2|Tbxa2r|Trf|Rapgef4|Dock10|Kif19a	-0.87	MyList
GO Biological Processes	19	GO:0045055	regulated exocytosis	19_GO:0051179 localization	-3.3	4.4	4.6	20836	145	260	8	3.1	1.1	18439|20614|20979|21990|26875|56508|70450|380732	P2rx7|Snap25|Syt1|Tph1|Pclo|Rapgef4|Unc13d|Milr1	-0.87	MyList
GO Biological Processes	19	GO:0001503	ossification	19_GO:0032501 multicellular organismal process	-3.3	3.4	4.3	20836	263	260	11	4.2	1.2	12160|12977|14219|14756|19242|20750|68713|74511|83453|239337|242050	Bmp5|Csf1|Ccn2|Gpld1|Ptn|Spp1|Ifitm1|Lrrc17|Chrdl1|Adamts12|Igsf10	-0.86	MyList
Reactome Gene Sets	6	R-MMU-9006934	Signaling by Receptor Tyrosine Kinases		-3.3	2.8	4.1	20836	398	260	14	5.4	1.4	11839|12064|12389|12826|14178|15170|15235|16818|18211|18590|19242|20750|71355|105855	Areg|Bdnf|Cav1|Col4a1|Fgf7|Ptpn6|Mst1|Lck|Ntrk1|Pdgfa|Ptn|Spp1|Col24a1|Nckap1l	-0.86	MyList
GO Biological Processes	19	GO:0032680	regulation of tumor necrosis factor production	19_GO:0032501 multicellular organismal process	-3.3	3.9	4.5	20836	185	260	9	3.5	1.1	12051|12491|12978|15170|16392|20186|83397|83430|214855	Bcl3|Cd36|Csf1r|Ptpn6|Isl1|Nr1h4|Akap12|Il23a|Arid5a	-0.83	MyList
GO Biological Processes	19	GO:0000165	MAPK cascade	19_GO:0023052 signaling	-3.2	3.9	4.4	20836	186	260	9	3.5	1.1	12389|12491|15170|18439|22041|26411|26414|242248|378425	Cav1|Cd36|Ptpn6|P2rx7|Trf|Map4k1|Mapk10|Bank1|Nlrp12	-0.83	MyList
Reactome Gene Sets	6	R-MMU-8957275	Post-translational protein phosphorylation		-3.2	4.9	4.7	20836	114	260	7	2.7	1	11576|12977|17182|20750|22041|83453|268977	Afp|Csf1|Matn3|Spp1|Trf|Chrdl1|Ltbp1	-0.83	MyList
GO Biological Processes	19	GO:0001944	vasculature development	19_GO:0032502 developmental process	-3.2	2.4	3.9	20836	603	260	18	6.9	1.6	11482|12389|12778|12822|12826|13835|14219|14239|14461|14756|18590|18933|68545|110542|224792|231532|268977|381524	Acvrl1|Cav1|Ackr3|Col18a1|Col4a1|Epha1|Ccn2|Foxs1|Gata2|Gpld1|Pdgfa|Prrx1|Ecscr|Amhr2|Adgrf5|Arhgap24|Ltbp1|Mexis	-0.83	MyList
GO Biological Processes	19	GO:0032715	negative regulation of interleukin-6 production	19_GO:0048519 negative regulation of biological process	-3.2	7.3	5.2	20836	55	260	5	1.9	0.85	15170|20186|105855|242248|378425	Ptpn6|Nr1h4|Nckap1l|Bank1|Nlrp12	-0.83	MyList
Reactome Gene Sets	6	R-MMU-1442490	Collagen degradation		-3.2	7.3	5.2	20836	55	260	5	1.9	0.85	12822|12826|12836|13038|17388	Col18a1|Col4a1|Col7a1|Ctsk|Mmp15	-0.83	MyList
GO Biological Processes	19	GO:0042531	positive regulation of tyrosine phosphorylation of STAT protein	19_GO:0023052 signaling	-3.2	7.3	5.2	20836	55	260	5	1.9	0.85	12978|15163|16392|16818|83430	Csf1r|Hcls1|Isl1|Lck|Il23a	-0.83	MyList
GO Biological Processes	19	GO:1903555	regulation of tumor necrosis factor superfamily cytokine production	19_GO:0032501 multicellular organismal process	-3.2	3.8	4.4	20836	188	260	9	3.5	1.1	12051|12491|12978|15170|16392|20186|83397|83430|214855	Bcl3|Cd36|Csf1r|Ptpn6|Isl1|Nr1h4|Akap12|Il23a|Arid5a	-0.83	MyList
GO Biological Processes	19	GO:1902105	regulation of leukocyte differentiation	19_GO:0002376 immune system process	-3.2	2.9	4.1	20836	359	260	13	5	1.4	12977|12978|14461|15163|15170|15284|16186|16818|54698|74511|83430|105855|278672	Csf1|Csf1r|Gata2|Hcls1|Ptpn6|Hlx|Il2rg|Lck|Crtam|Lrrc17|Il23a|Nckap1l|Duxbl1	-0.83	MyList
GO Biological Processes	19	GO:0030336	negative regulation of cell migration	19_GO:0040011 locomotion	-3.2	3.1	4.1	20836	314	260	12	4.6	1.3	11482|11857|12389|13835|15139|19242|21390|68713|77569|107351|118453|259302	Acvrl1|Arhgdib|Cav1|Epha1|Hc|Ptn|Tbxa2r|Ifitm1|Limch1|Kank1|Mmp28|Srgap3	-0.83	MyList
GO Biological Processes	19	GO:0043372	positive regulation of CD4-positive, alpha-beta T cell differentiation	19_GO:0002376 immune system process	-3.2	10	5.7	20836	32	260	4	1.5	0.76	15284|16186|83430|105855	Hlx|Il2rg|Il23a|Nckap1l	-0.82	MyList
GO Biological Processes	19	GO:0097435	supramolecular fiber organization	19_GO:0009987 cellular process	-3.2	2.5	3.9	20836	556	260	17	6.5	1.5	11519|12389|12491|12822|12954|15163|18175|19201|22041|22349|54132|68016|77055|239337|246177|286942|320664	Add2|Cav1|Cd36|Col18a1|Cryaa|Hcls1|Nrap|Pstpip2|Trf|Vil1|Pdlim1|Cavin4|Krt76|Adamts12|Myo1g|Kif19a|Cass4	-0.82	MyList
GO Biological Processes	19	GO:0032970	regulation of actin filament-based process	19_GO:0050789 regulation of biological process	-3.2	2.7	4	20836	411	260	14	5.4	1.4	11475|11519|11857|12389|12978|13835|14219|15163|18125|19736|22349|77569|105855|107351	Acta2|Add2|Arhgdib|Cav1|Csf1r|Epha1|Ccn2|Hcls1|Nos1|Rgs4|Vil1|Limch1|Nckap1l|Kank1	-0.8	MyList
GO Biological Processes	19	GO:0032729	positive regulation of type II interferon production	19_GO:0048518 positive regulation of biological process	-3.1	5.6	4.8	20836	86	260	6	2.3	0.93	12051|16392|54698|77777|83430|214855	Bcl3|Isl1|Crtam|Ulbp1|Il23a|Arid5a	-0.78	MyList
GO Biological Processes	19	GO:0019221	cytokine-mediated signaling pathway	19_GO:0023052 signaling	-3.1	3	4	20836	322	260	12	4.6	1.3	12389|12778|12977|12978|15170|16164|16186|16880|17329|18414|24099|68713	Cav1|Ackr3|Csf1|Csf1r|Ptpn6|Il13ra1|Il2rg|Lifr|Cxcl9|Osmr|Tnfsf13b|Ifitm1	-0.78	MyList
GO Biological Processes	19	GO:0060443	mammary gland morphogenesis	19_GO:0032502 developmental process	-3.1	6.9	5.1	20836	58	260	5	1.9	0.85	11839|12389|12977|13710|15235	Areg|Cav1|Csf1|Elf3|Mst1	-0.78	MyList
GO Biological Processes	19	GO:0001776	leukocyte homeostasis	19_GO:0042592 homeostatic process	-3.1	4.7	4.5	20836	120	260	7	2.7	1	12977|12978|15139|18439|24099|105855|210293	Csf1|Csf1r|Hc|P2rx7|Tnfsf13b|Nckap1l|Dock10	-0.78	MyList
Reactome Gene Sets	6	R-MMU-381426	Regulation of Insulin-like Growth Factor (IGF) transport and uptake by Insulin-like Growth Factor Binding Proteins (IGFBPs)		-3.1	4.7	4.5	20836	120	260	7	2.7	1	11576|12977|17182|20750|22041|83453|268977	Afp|Csf1|Matn3|Spp1|Trf|Chrdl1|Ltbp1	-0.78	MyList
Reactome Gene Sets	6	R-MMU-449836	Other interleukin signaling		-3.1	16	6.5	20836	15	260	3	1.2	0.66	12977|12978|20614	Csf1|Csf1r|Snap25	-0.78	MyList
GO Biological Processes	19	GO:0030879	mammary gland development	19_GO:0032502 developmental process	-3.1	4.1	4.4	20836	156	260	8	3.1	1.1	11839|12389|12977|13710|15235|21990|54139|69047	Areg|Cav1|Csf1|Elf3|Mst1|Tph1|Irf6|Atp2c2	-0.78	MyList
GO Biological Processes	19	GO:0045927	positive regulation of growth	19_GO:0040007 growth	-3.1	3	4	20836	323	260	12	4.6	1.3	11474|12064|12444|12954|12977|14239|15284|18198|20979|22349|66102|74318	Actn3|Bdnf|Ccnd2|Cryaa|Csf1|Foxs1|Hlx|Musk|Syt1|Vil1|Cxcl16|Hopx	-0.78	MyList
GO Biological Processes	19	GO:0097120	receptor localization to synapse	19_GO:0051179 localization	-3.1	6.8	5	20836	59	260	5	1.9	0.85	20614|23859|26414|77531|81905	Snap25|Dlg2|Mapk10|Anks1b|Cacng8	-0.77	MyList
GO Biological Processes	19	GO:0043367	CD4-positive, alpha-beta T cell differentiation	19_GO:0002376 immune system process	-3.1	6.8	5	20836	59	260	5	1.9	0.85	12051|15284|16186|16205|53314	Bcl3|Hlx|Il2rg|Gimap1|Batf	-0.77	MyList
GO Biological Processes	19	GO:0050679	positive regulation of epithelial cell proliferation	19_GO:0048518 positive regulation of biological process	-3.1	3.4	4.1	20836	238	260	10	3.8	1.2	11482|12160|12389|12444|12822|14178|14461|15235|15284|19242	Acvrl1|Bmp5|Cav1|Ccnd2|Col18a1|Fgf7|Gata2|Mst1|Hlx|Ptn	-0.77	MyList
GO Biological Processes	19	GO:0032652	regulation of interleukin-1 production	19_GO:0032501 multicellular organismal process	-3.1	4.6	4.5	20836	122	260	7	2.7	1	12362|12491|16392|18439|20186|378425|623121	Casp1|Cd36|Isl1|P2rx7|Nr1h4|Nlrp12|Ifi213	-0.77	MyList
GO Biological Processes	19	GO:0050920	regulation of chemotaxis	19_GO:0040011 locomotion	-3.1	3.4	4.1	20836	239	260	10	3.8	1.2	12977|12978|15139|15235|19242|27226|83430|105855|106512|118453	Csf1|Csf1r|Hc|Mst1|Ptn|Pla2g7|Il23a|Nckap1l|Gpsm3|Mmp28	-0.77	MyList
GO Biological Processes	19	GO:2000146	negative regulation of cell motility	19_GO:0040011 locomotion	-3.1	2.9	4	20836	327	260	12	4.6	1.3	11482|11857|12389|13835|15139|19242|21390|68713|77569|107351|118453|259302	Acvrl1|Arhgdib|Cav1|Epha1|Hc|Ptn|Tbxa2r|Ifitm1|Limch1|Kank1|Mmp28|Srgap3	-0.77	MyList
GO Biological Processes	19	GO:0002699	positive regulation of immune effector process	19_GO:0002376 immune system process	-3.1	2.9	4	20836	327	260	12	4.6	1.3	12362|12491|14461|15170|15284|17195|18439|54698|70450|77777|83430|214855	Casp1|Cd36|Gata2|Ptpn6|Hlx|Mbl2|P2rx7|Crtam|Unc13d|Ulbp1|Il23a|Arid5a	-0.77	MyList
GO Biological Processes	19	GO:0050900	leukocyte migration	19_GO:0002376 immune system process	-3	3.3	4.1	20836	240	260	10	3.8	1.2	11519|12977|17329|19242|20750|54698|66102|105855|246177|378425	Add2|Csf1|Cxcl9|Ptn|Spp1|Crtam|Cxcl16|Nckap1l|Myo1g|Nlrp12	-0.76	MyList
GO Biological Processes	19	GO:0002449	lymphocyte mediated immunity	19_GO:0002376 immune system process	-3	3.6	4.2	20836	199	260	9	3.5	1.1	12051|15139|15170|17195|18439|53314|70450|77777|246177	Bcl3|Hc|Ptpn6|Mbl2|P2rx7|Batf|Unc13d|Ulbp1|Myo1g	-0.76	MyList
GO Biological Processes	19	GO:0035023	regulation of Rho protein signal transduction	19_GO:0023052 signaling	-3	5.3	4.6	20836	90	260	6	2.3	0.93	11548|11857|68016|107351|110596|236920	Adra1b|Arhgdib|Cavin4|Kank1|Arhgef28|Stard8	-0.76	MyList
GO Biological Processes	19	GO:0007406	negative regulation of neuroblast proliferation	19_GO:0048519 negative regulation of biological process	-3	15	6.3	20836	16	260	3	1.2	0.66	12064|14461|19242	Bdnf|Gata2|Ptn	-0.76	MyList
GO Biological Processes	19	GO:0010832	negative regulation of myotube differentiation	19_GO:0048519 negative regulation of biological process	-3	15	6.3	20836	16	260	3	1.2	0.66	12064|12978|227721	Bdnf|Csf1r|Plpp7	-0.76	MyList
GO Biological Processes	19	GO:0002685	regulation of leukocyte migration	19_GO:0040011 locomotion	-3	3.3	4.1	20836	242	260	10	3.8	1.2	12977|12978|15139|15235|19242|27226|83430|105855|106512|118453	Csf1|Csf1r|Hc|Mst1|Ptn|Pla2g7|Il23a|Nckap1l|Gpsm3|Mmp28	-0.75	MyList
GO Biological Processes	19	GO:0032649	regulation of type II interferon production	19_GO:0032501 multicellular organismal process	-3	4.5	4.4	20836	125	260	7	2.7	1	12051|16392|20186|54698|77777|83430|214855	Bcl3|Isl1|Nr1h4|Crtam|Ulbp1|Il23a|Arid5a	-0.75	MyList
GO Biological Processes	19	GO:0070372	regulation of ERK1 and ERK2 cascade	19_GO:0023052 signaling	-3	2.9	3.9	20836	336	260	12	4.6	1.3	11475|12389|12491|12778|12978|14219|15170|18590|51791|83397|109042|378425	Acta2|Cav1|Cd36|Ackr3|Csf1r|Ccn2|Ptpn6|Pdgfa|Rgs14|Akap12|Cavin3|Nlrp12	-0.7	MyList
GO Biological Processes	19	GO:0060100	positive regulation of phagocytosis, engulfment	19_GO:0051179 localization	-2.9	14	6.1	20836	17	260	3	1.2	0.66	12491|14461|105855	Cd36|Gata2|Nckap1l	-0.7	MyList
GO Biological Processes	19	GO:1905155	positive regulation of membrane invagination	19_GO:0048518 positive regulation of biological process	-2.9	14	6.1	20836	17	260	3	1.2	0.66	12491|14461|105855	Cd36|Gata2|Nckap1l	-0.7	MyList
GO Biological Processes	19	GO:0001525	angiogenesis	19_GO:0032502 developmental process	-2.9	2.8	3.8	20836	339	260	12	4.6	1.3	11482|12389|12778|12822|12826|13835|14219|14461|14756|18590|68545|231532	Acvrl1|Cav1|Ackr3|Col18a1|Col4a1|Epha1|Ccn2|Gata2|Gpld1|Pdgfa|Ecscr|Arhgap24	-0.69	MyList
GO Biological Processes	19	GO:0006869	lipid transport	19_GO:0051179 localization	-2.9	2.8	3.8	20836	339	260	12	4.6	1.3	11981|12389|12491|16534|18439|20186|99031|223920|225579|233810|241633|381524	Atp9a|Cav1|Cd36|Kcnn4|P2rx7|Nr1h4|Osbpl6|Soat2|Slc27a6|Abca16|Atp8b4|Mexis	-0.69	MyList
GO Biological Processes	19	GO:0002694	regulation of leukocyte activation	19_GO:0002376 immune system process	-2.9	2.2	3.6	20836	643	260	18	6.9	1.6	12389|12978|14461|15170|15284|16186|16818|24099|54698|70450|77777|83430|105855|224792|242248|278672|320484|380732	Cav1|Csf1r|Gata2|Ptpn6|Hlx|Il2rg|Lck|Tnfsf13b|Crtam|Unc13d|Ulbp1|Il23a|Nckap1l|Adgrf5|Bank1|Duxbl1|Rasal3|Milr1	-0.67	MyList
GO Biological Processes	19	GO:0002443	leukocyte mediated immunity	19_GO:0002376 immune system process	-2.9	3.2	3.9	20836	253	260	10	3.8	1.2	12051|15139|15170|17195|18439|53314|70450|77777|246177|380732	Bcl3|Hc|Ptpn6|Mbl2|P2rx7|Batf|Unc13d|Ulbp1|Myo1g|Milr1	-0.64	MyList
GO Biological Processes	19	GO:0002335	mature B cell differentiation	19_GO:0002376 immune system process	-2.9	8.2	5.1	20836	39	260	4	1.5	0.76	12051|16186|17305|210293	Bcl3|Il2rg|Mfng|Dock10	-0.64	MyList
KEGG Pathway	24	mmu04630	JAK-STAT signaling pathway - Mus musculus (house mouse)		-2.8	3.7	4.1	20836	171	260	8	3.1	1.1	12444|15170|16164|16186|16880|18414|18590|83430	Ccnd2|Ptpn6|Il13ra1|Il2rg|Lifr|Osmr|Pdgfa|Il23a	-0.63	MyList
GO Biological Processes	19	GO:0007015	actin filament organization	19_GO:0009987 cellular process	-2.8	3.1	3.9	20836	255	260	10	3.8	1.2	11519|12954|15163|18175|19201|22041|22349|54132|246177|320664	Add2|Cryaa|Hcls1|Nrap|Pstpip2|Trf|Vil1|Pdlim1|Myo1g|Cass4	-0.63	MyList
Reactome Gene Sets	6	R-MMU-1280215	Cytokine Signaling in Immune system		-2.8	2.6	3.7	20836	395	260	13	5	1.4	12362|12977|12978|15170|16164|16186|16818|16880|18414|20614|24099|26414|83430	Casp1|Csf1|Csf1r|Ptpn6|Il13ra1|Il2rg|Lck|Lifr|Osmr|Snap25|Tnfsf13b|Mapk10|Il23a	-0.62	MyList
GO Biological Processes	19	GO:0002460	adaptive immune response based on somatic recombination of immune receptors built from immunoglobulin superfamily domains	19_GO:0002376 immune system process	-2.8	3.4	3.9	20836	213	260	9	3.5	1.1	12051|15139|15284|17195|18439|24099|53314|70450|246177	Bcl3|Hc|Hlx|Mbl2|P2rx7|Tnfsf13b|Batf|Unc13d|Myo1g	-0.62	MyList
GO Biological Processes	19	GO:1903706	regulation of hemopoiesis	19_GO:0002376 immune system process	-2.8	2.5	3.6	20836	445	260	14	5.4	1.4	12977|12978|14461|15163|15170|15284|16186|16818|19242|54698|74511|83430|105855|278672	Csf1|Csf1r|Gata2|Hcls1|Ptpn6|Hlx|Il2rg|Lck|Ptn|Crtam|Lrrc17|Il23a|Nckap1l|Duxbl1	-0.62	MyList
GO Biological Processes	19	GO:0032731	positive regulation of interleukin-1 beta production	19_GO:0048518 positive regulation of biological process	-2.8	6	4.6	20836	67	260	5	1.9	0.85	12362|12491|16392|18439|623121	Casp1|Cd36|Isl1|P2rx7|Ifi213	-0.62	MyList
GO Biological Processes	19	GO:0043267	negative regulation of potassium ion transport	19_GO:0051179 localization	-2.8	8	5	20836	40	260	4	1.5	0.76	11735|12389|18125|19736	Ank3|Cav1|Nos1|Rgs4	-0.62	MyList
GO Biological Processes	19	GO:0046903	secretion	19_GO:0051179 localization	-2.8	2.3	3.6	20836	549	260	16	6.2	1.5	12064|12389|14178|14219|16534|18439|20614|20979|21990|26875|56508|70450|101772|232156|246177|380732	Bdnf|Cav1|Fgf7|Ccn2|Kcnn4|P2rx7|Snap25|Syt1|Tph1|Pclo|Rapgef4|Unc13d|Ano1|Slc4a5|Myo1g|Milr1	-0.62	MyList
GO Biological Processes	19	GO:0051148	negative regulation of muscle cell differentiation	19_GO:0048519 negative regulation of biological process	-2.8	5.9	4.5	20836	68	260	5	1.9	0.85	12064|12444|12978|19736|227721	Bdnf|Ccnd2|Csf1r|Rgs4|Plpp7	-0.61	MyList
GO Biological Processes	19	GO:0042092	type 2 immune response	19_GO:0002376 immune system process	-2.8	13	5.7	20836	19	260	3	1.2	0.66	12051|15284|53314	Bcl3|Hlx|Batf	-0.61	MyList
GO Biological Processes	19	GO:0006897	endocytosis	19_GO:0051179 localization	-2.8	2.6	3.6	20836	400	260	13	5	1.4	11981|12389|12491|12778|18779|20614|20975|20979|65969|66102|81905|214854|380713	Atp9a|Cav1|Cd36|Ackr3|Pla2r1|Snap25|Synj2|Syt1|Cubn|Cxcl16|Cacng8|Neurl3|Scarf1	-0.6	MyList
GO Biological Processes	19	GO:1902532	negative regulation of intracellular signal transduction	19_GO:0023052 signaling	-2.8	2.3	3.5	20836	553	260	16	6.2	1.5	11474|11548|12389|12778|15170|18439|20186|51791|75590|107351|109042|170799|231532|242248|320484|378425	Actn3|Adra1b|Cav1|Ackr3|Ptpn6|P2rx7|Nr1h4|Rgs14|Dusp9|Kank1|Cavin3|Rtkn2|Arhgap24|Bank1|Rasal3|Nlrp12	-0.6	MyList
GO Biological Processes	19	GO:0061180	mammary gland epithelium development	19_GO:0032502 developmental process	-2.8	5.8	4.5	20836	69	260	5	1.9	0.85	11839|12977|15235|54139|69047	Areg|Csf1|Mst1|Irf6|Atp2c2	-0.59	MyList
GO Biological Processes	19	GO:0048732	gland development	19_GO:0032502 developmental process	-2.8	2.5	3.6	20836	453	260	14	5.4	1.4	11839|12389|12977|13710|14178|14461|15235|15284|16392|21990|22409|54139|69047|77055	Areg|Cav1|Csf1|Elf3|Fgf7|Gata2|Mst1|Hlx|Isl1|Tph1|Wnt10a|Irf6|Atp2c2|Krt76	-0.58	MyList
GO Biological Processes	19	GO:1904063	negative regulation of cation transmembrane transport	19_GO:0051179 localization	-2.8	4.7	4.2	20836	102	260	6	2.3	0.93	11735|12389|18125|19736|29867|56437	Ank3|Cav1|Nos1|Rgs4|Cabp1|Rrad	-0.58	MyList
GO Biological Processes	19	GO:2000516	positive regulation of CD4-positive, alpha-beta T cell activation	19_GO:0002376 immune system process	-2.7	7.6	4.8	20836	42	260	4	1.5	0.76	15284|16186|83430|105855	Hlx|Il2rg|Il23a|Nckap1l	-0.57	MyList
GO Biological Processes	19	GO:0048148	behavioral response to cocaine	19_GO:0032501 multicellular organismal process	-2.7	12	5.5	20836	20	260	3	1.2	0.66	11548|12064|18125	Adra1b|Bdnf|Nos1	-0.57	MyList
GO Biological Processes	19	GO:0048514	blood vessel morphogenesis	19_GO:0032502 developmental process	-2.7	2.5	3.5	20836	457	260	14	5.4	1.4	11482|12389|12778|12822|12826|13835|14219|14461|14756|18590|18933|68545|224792|231532	Acvrl1|Cav1|Ackr3|Col18a1|Col4a1|Epha1|Ccn2|Gata2|Gpld1|Pdgfa|Prrx1|Ecscr|Adgrf5|Arhgap24	-0.56	MyList
GO Biological Processes	19	GO:0030193	regulation of blood coagulation	19_GO:0032501 multicellular organismal process	-2.7	5.6	4.4	20836	71	260	5	1.9	0.85	12389|12491|18590|21390|216350	Cav1|Cd36|Pdgfa|Tbxa2r|Tspan8	-0.56	MyList
GO Biological Processes	19	GO:0002252	immune effector process	19_GO:0002376 immune system process	-2.7	2.6	3.6	20836	408	260	13	5	1.4	12051|15139|15170|15284|17195|17305|18439|53314|70450|77777|210293|246177|380732	Bcl3|Hc|Ptpn6|Hlx|Mbl2|Mfng|P2rx7|Batf|Unc13d|Ulbp1|Dock10|Myo1g|Milr1	-0.56	MyList
GO Biological Processes	19	GO:0006935	chemotaxis	19_GO:0040011 locomotion	-2.7	2.3	3.5	20836	512	260	15	5.8	1.4	11735|12064|12778|12978|14178|16392|17329|18211|18590|19242|20750|66102|66793|68545|105855	Ank3|Bdnf|Ackr3|Csf1r|Fgf7|Isl1|Cxcl9|Ntrk1|Pdgfa|Ptn|Spp1|Cxcl16|Efcab1|Ecscr|Nckap1l	-0.54	MyList
GO Biological Processes	19	GO:0040013	negative regulation of locomotion	19_GO:0040011 locomotion	-2.7	2.7	3.6	20836	362	260	12	4.6	1.3	11482|11857|12389|13835|15139|19242|21390|68713|77569|107351|118453|259302	Acvrl1|Arhgdib|Cav1|Epha1|Hc|Ptn|Tbxa2r|Ifitm1|Limch1|Kank1|Mmp28|Srgap3	-0.54	MyList
GO Biological Processes	19	GO:0050804	modulation of chemical synaptic transmission	19_GO:0023052 signaling	-2.7	2.1	3.4	20836	729	260	19	7.3	1.6	12064|18125|18198|18211|18439|19242|19736|20614|20979|26875|51791|56508|70546|81905|83397|83453|170571|232370|260297	Bdnf|Nos1|Musk|Ntrk1|P2rx7|Ptn|Rgs4|Snap25|Syt1|Pclo|Rgs14|Rapgef4|Zdhhc2|Cacng8|Akap12|Chrdl1|Cntnap4|Clstn3|Prrt1	-0.54	MyList
GO Biological Processes	19	GO:0042330	taxis	19_GO:0040011 locomotion	-2.7	2.3	3.5	20836	514	260	15	5.8	1.4	11735|12064|12778|12978|14178|16392|17329|18211|18590|19242|20750|66102|66793|68545|105855	Ank3|Bdnf|Ackr3|Csf1r|Fgf7|Isl1|Cxcl9|Ntrk1|Pdgfa|Ptn|Spp1|Cxcl16|Efcab1|Ecscr|Nckap1l	-0.54	MyList
GO Biological Processes	19	GO:0099177	regulation of trans-synaptic signaling	19_GO:0023052 signaling	-2.7	2.1	3.4	20836	730	260	19	7.3	1.6	12064|18125|18198|18211|18439|19242|19736|20614|20979|26875|51791|56508|70546|81905|83397|83453|170571|232370|260297	Bdnf|Nos1|Musk|Ntrk1|P2rx7|Ptn|Rgs4|Snap25|Syt1|Pclo|Rgs14|Rapgef4|Zdhhc2|Cacng8|Akap12|Chrdl1|Cntnap4|Clstn3|Prrt1	-0.54	MyList
GO Biological Processes	19	GO:0071071	regulation of phospholipid biosynthetic process	19_GO:0008152 metabolic process	-2.7	11	5.4	20836	21	260	3	1.2	0.66	18590|20186|224792	Pdgfa|Nr1h4|Adgrf5	-0.54	MyList
GO Biological Processes	19	GO:0045649	regulation of macrophage differentiation	19_GO:0002376 immune system process	-2.7	11	5.4	20836	21	260	3	1.2	0.66	12977|14461|15163	Csf1|Gata2|Hcls1	-0.54	MyList
GO Biological Processes	19	GO:0060221	retinal rod cell differentiation	19_GO:0032502 developmental process	-2.7	11	5.4	20836	21	260	3	1.2	0.66	19242|69743|77945	Ptn|Casz1|Rpgrip1	-0.54	MyList
GO Biological Processes	19	GO:0060099	regulation of phagocytosis, engulfment	19_GO:0051179 localization	-2.7	11	5.4	20836	21	260	3	1.2	0.66	12491|14461|105855	Cd36|Gata2|Nckap1l	-0.54	MyList
Reactome Gene Sets	6	R-MMU-418346	Platelet homeostasis		-2.7	5.5	4.3	20836	73	260	5	1.9	0.85	14710|15170|18125|18439|18573	Gngt2|Ptpn6|Nos1|P2rx7|Pde1a	-0.54	MyList
WikiPathways	27	WP2841	Focal adhesion: PI3K-Akt-mTOR signaling pathway		-2.7	2.8	3.6	20836	317	260	11	4.2	1.2	12826|12977|12978|14178|14710|16186|18125|18414|18590|20750|192897	Col4a1|Csf1|Csf1r|Fgf7|Gngt2|Il2rg|Nos1|Osmr|Pdgfa|Spp1|Itgb4	-0.54	MyList
Reactome Gene Sets	6	R-MMU-1474228	Degradation of the extracellular matrix		-2.6	4.5	4.1	20836	107	260	6	2.3	0.93	12822|12826|12836|13038|17388|20750	Col18a1|Col4a1|Col7a1|Ctsk|Mmp15|Spp1	-0.53	MyList
GO Biological Processes	19	GO:1903829	positive regulation of protein localization	19_GO:0051179 localization	-2.6	2.3	3.4	20836	519	260	15	5.8	1.4	11735|14756|15163|15444|16392|16534|18198|18439|19242|20186|22349|56508|70546|101772|232370	Ank3|Gpld1|Hcls1|Hpca|Isl1|Kcnn4|Musk|P2rx7|Ptn|Nr1h4|Vil1|Rapgef4|Zdhhc2|Ano1|Clstn3	-0.53	MyList
GO Biological Processes	19	GO:0018108	peptidyl-tyrosine phosphorylation	19_GO:0008152 metabolic process	-2.6	4.5	4	20836	108	260	6	2.3	0.93	12389|12978|13835|15170|16818|18211	Cav1|Csf1r|Epha1|Ptpn6|Lck|Ntrk1	-0.53	MyList
GO Biological Processes	19	GO:0061098	positive regulation of protein tyrosine kinase activity	19_GO:0048518 positive regulation of biological process	-2.6	7.1	4.6	20836	45	260	4	1.5	0.76	11839|12978|66610|320664	Areg|Csf1r|Abi3|Cass4	-0.53	MyList
Reactome Gene Sets	6	R-MMU-2022090	Assembly of collagen fibrils and other multimeric structures		-2.6	7.1	4.6	20836	45	260	4	1.5	0.76	12822|12826|12836|71355	Col18a1|Col4a1|Col7a1|Col24a1	-0.53	MyList
GO Biological Processes	19	GO:0010830	regulation of myotube differentiation	19_GO:0032502 developmental process	-2.6	7.1	4.6	20836	45	260	4	1.5	0.76	11474|12064|12978|227721	Actn3|Bdnf|Csf1r|Plpp7	-0.53	MyList
GO Biological Processes	19	GO:0042113	B cell activation	19_GO:0002376 immune system process	-2.6	3.1	3.7	20836	229	260	9	3.5	1.1	12051|16186|16205|17305|18211|24099|53314|210293|242248	Bcl3|Il2rg|Gimap1|Mfng|Ntrk1|Tnfsf13b|Batf|Dock10|Bank1	-0.52	MyList
GO Biological Processes	19	GO:0030099	myeloid cell differentiation	19_GO:0032502 developmental process	-2.6	2.7	3.5	20836	321	260	11	4.2	1.2	12977|12978|14461|15163|15170|19824|22041|53314|74481|224792|623121	Csf1|Csf1r|Gata2|Hcls1|Ptpn6|Trim10|Trf|Batf|Batf2|Adgrf5|Ifi213	-0.52	MyList
GO Biological Processes	19	GO:1905153	regulation of membrane invagination	19_GO:0050789 regulation of biological process	-2.6	11	5.2	20836	22	260	3	1.2	0.66	12491|14461|105855	Cd36|Gata2|Nckap1l	-0.52	MyList
GO Biological Processes	19	GO:0002931	response to ischemia	19_GO:0050896 response to stimulus	-2.6	7	4.6	20836	46	260	4	1.5	0.76	12389|12977|12978|72393	Cav1|Csf1|Csf1r|Faim2	-0.51	MyList
GO Biological Processes	19	GO:0032660	regulation of interleukin-17 production	19_GO:0032501 multicellular organismal process	-2.6	7	4.6	20836	46	260	4	1.5	0.76	20186|83430|105855|214855	Nr1h4|Il23a|Nckap1l|Arid5a	-0.51	MyList
GO Biological Processes	19	GO:0018212	peptidyl-tyrosine modification	19_GO:0008152 metabolic process	-2.6	4.4	4	20836	110	260	6	2.3	0.93	12389|12978|13835|15170|16818|18211	Cav1|Csf1r|Epha1|Ptpn6|Lck|Ntrk1	-0.51	MyList
GO Biological Processes	19	GO:1905477	positive regulation of protein localization to membrane	19_GO:0051179 localization	-2.6	4.3	4	20836	111	260	6	2.3	0.93	11735|15444|18198|19242|22349|70546	Ank3|Hpca|Musk|Ptn|Vil1|Zdhhc2	-0.49	MyList
GO Biological Processes	19	GO:0007611	learning or memory	19_GO:0032501 multicellular organismal process	-2.6	2.7	3.5	20836	326	260	11	4.2	1.2	11548|12064|12362|12444|18198|18211|19242|20614|51791|218461|260297	Adra1b|Bdnf|Casp1|Ccnd2|Musk|Ntrk1|Ptn|Snap25|Rgs14|Pde8b|Prrt1	-0.49	MyList
GO Biological Processes	19	GO:0046635	positive regulation of alpha-beta T cell activation	19_GO:0002376 immune system process	-2.6	5.2	4.2	20836	77	260	5	1.9	0.85	15284|16186|83430|105855|320484	Hlx|Il2rg|Il23a|Nckap1l|Rasal3	-0.49	MyList
GO Biological Processes	19	GO:0035710	CD4-positive, alpha-beta T cell activation	19_GO:0002376 immune system process	-2.6	5.2	4.2	20836	77	260	5	1.9	0.85	12051|15284|16186|16205|53314	Bcl3|Hlx|Il2rg|Gimap1|Batf	-0.49	MyList
GO Biological Processes	19	GO:0035418	protein localization to synapse	19_GO:0051179 localization	-2.6	5.2	4.2	20836	77	260	5	1.9	0.85	20614|23859|26414|26875|70546	Snap25|Dlg2|Mapk10|Pclo|Zdhhc2	-0.49	MyList
GO Biological Processes	19	GO:0042551	neuron maturation	19_GO:0032502 developmental process	-2.6	6.8	4.5	20836	47	260	4	1.5	0.76	11735|23859|68955|380713	Ank3|Dlg2|Srrm4|Scarf1	-0.49	MyList
GO Biological Processes	19	GO:0030501	positive regulation of bone mineralization	19_GO:0032502 developmental process	-2.6	6.8	4.5	20836	47	260	4	1.5	0.76	11474|12978|18439|19242	Actn3|Csf1r|P2rx7|Ptn	-0.49	MyList
GO Biological Processes	19	GO:1903909	regulation of receptor clustering	19_GO:0051179 localization	-2.5	10	5.1	20836	23	260	3	1.2	0.66	18198|19242|70546	Musk|Ptn|Zdhhc2	-0.49	MyList
GO Biological Processes	19	GO:0034329	cell junction assembly	19_GO:0009987 cellular process	-2.5	2.9	3.5	20836	280	260	10	3.8	1.2	11474|11519|12064|18260|20186|26875|56863|70546|192897|232370	Actn3|Add2|Bdnf|Ocln|Nr1h4|Pclo|Cldn9|Zdhhc2|Itgb4|Clstn3	-0.49	MyList
KEGG Pathway	24	mmu04014	Ras signaling pathway - Mus musculus (house mouse)		-2.5	3.1	3.6	20836	235	260	9	3.5	1.1	12064|12977|12978|14178|14710|18211|18590|26414|320484	Bdnf|Csf1|Csf1r|Fgf7|Gngt2|Ntrk1|Pdgfa|Mapk10|Rasal3	-0.49	MyList
GO Biological Processes	19	GO:0010876	lipid localization	19_GO:0051179 localization	-2.5	2.6	3.4	20836	377	260	12	4.6	1.3	11981|12389|12491|16534|18439|20186|99031|223920|225579|233810|241633|381524	Atp9a|Cav1|Cd36|Kcnn4|P2rx7|Nr1h4|Osbpl6|Soat2|Slc27a6|Abca16|Atp8b4|Mexis	-0.49	MyList
GO Biological Processes	19	GO:0061097	regulation of protein tyrosine kinase activity	19_GO:0008152 metabolic process	-2.5	5.1	4.1	20836	78	260	5	1.9	0.85	11839|12389|12978|66610|320664	Areg|Cav1|Csf1r|Abi3|Cass4	-0.49	MyList
GO Biological Processes	19	GO:0032732	positive regulation of interleukin-1 production	19_GO:0048518 positive regulation of biological process	-2.5	5.1	4.1	20836	78	260	5	1.9	0.85	12362|12491|16392|18439|623121	Casp1|Cd36|Isl1|P2rx7|Ifi213	-0.49	MyList
Reactome Gene Sets	6	R-MMU-9013405	RHOD GTPase cycle		-2.5	6.7	4.4	20836	48	260	4	1.5	0.76	12389|52331|70598|83397	Cav1|Stbd1|Filip1|Akap12	-0.48	MyList
GO Biological Processes	19	GO:1903539	protein localization to postsynaptic membrane	19_GO:0051179 localization	-2.5	6.7	4.4	20836	48	260	4	1.5	0.76	20614|23859|26414|70546	Snap25|Dlg2|Mapk10|Zdhhc2	-0.48	MyList
GO Biological Processes	19	GO:2001258	negative regulation of cation channel activity	19_GO:0051179 localization	-2.5	6.7	4.4	20836	48	260	4	1.5	0.76	11735|12389|29867|56437	Ank3|Cav1|Cabp1|Rrad	-0.48	MyList
GO Biological Processes	19	GO:0050867	positive regulation of cell activation	19_GO:0048518 positive regulation of biological process	-2.5	2.4	3.4	20836	430	260	13	5	1.4	11475|12389|12978|14219|14461|15284|16186|16818|24099|77777|83430|105855|320484	Acta2|Cav1|Csf1r|Ccn2|Gata2|Hlx|Il2rg|Lck|Tnfsf13b|Ulbp1|Il23a|Nckap1l|Rasal3	-0.48	MyList
GO Biological Processes	19	GO:0050878	regulation of body fluid levels	19_GO:0065007 biological regulation	-2.5	2.7	3.4	20836	331	260	11	4.2	1.2	12389|12491|15170|16534|18590|19124|21390|21990|101772|216350|232156	Cav1|Cd36|Ptpn6|Kcnn4|Pdgfa|Procr|Tbxa2r|Tph1|Ano1|Tspan8|Slc4a5	-0.48	MyList
GO Biological Processes	19	GO:0045639	positive regulation of myeloid cell differentiation	19_GO:0002376 immune system process	-2.5	4.2	3.9	20836	114	260	6	2.3	0.93	12977|12978|14461|15163|83430|105855	Csf1|Csf1r|Gata2|Hcls1|Il23a|Nckap1l	-0.48	MyList
GO Biological Processes	19	GO:0032760	positive regulation of tumor necrosis factor production	19_GO:0048518 positive regulation of biological process	-2.5	4.2	3.9	20836	114	260	6	2.3	0.93	12491|12978|16392|83397|83430|214855	Cd36|Csf1r|Isl1|Akap12|Il23a|Arid5a	-0.48	MyList
GO Biological Processes	19	GO:1903036	positive regulation of response to wounding	19_GO:0048518 positive regulation of biological process	-2.5	5.1	4.1	20836	79	260	5	1.9	0.85	12491|19242|21390|107351|380713	Cd36|Ptn|Tbxa2r|Kank1|Scarf1	-0.48	MyList
GO Biological Processes	19	GO:0001780	neutrophil homeostasis	19_GO:0042592 homeostatic process	-2.5	10	5	20836	24	260	3	1.2	0.66	12977|12978|15139	Csf1|Csf1r|Hc	-0.48	MyList
GO Biological Processes	19	GO:0006887	exocytosis	19_GO:0051179 localization	-2.5	3	3.5	20836	239	260	9	3.5	1.1	18439|20614|20979|21990|26875|56508|70450|246177|380732	P2rx7|Snap25|Syt1|Tph1|Pclo|Rapgef4|Unc13d|Myo1g|Milr1	-0.48	MyList
GO Biological Processes	19	GO:0035239	tube morphogenesis	19_GO:0032502 developmental process	-2.5	2	3.2	20836	758	260	19	7.3	1.6	11482|11839|12160|12389|12778|12822|12826|12977|13835|14219|14461|14756|15235|15284|18590|18933|68545|224792|231532	Acvrl1|Areg|Bmp5|Cav1|Ackr3|Col18a1|Col4a1|Csf1|Epha1|Ccn2|Gata2|Gpld1|Mst1|Hlx|Pdgfa|Prrx1|Ecscr|Adgrf5|Arhgap24	-0.48	MyList
GO Biological Processes	19	GO:0034766	negative regulation of monoatomic ion transmembrane transport	19_GO:0051179 localization	-2.5	4.2	3.8	20836	115	260	6	2.3	0.93	11735|12389|18125|19736|29867|56437	Ank3|Cav1|Nos1|Rgs4|Cabp1|Rrad	-0.48	MyList
GO Biological Processes	19	GO:0045332	phospholipid translocation	19_GO:0051179 localization	-2.5	6.5	4.4	20836	49	260	4	1.5	0.76	11981|16534|18439|241633	Atp9a|Kcnn4|P2rx7|Atp8b4	-0.48	MyList
GO Biological Processes	19	GO:0062237	protein localization to postsynapse	19_GO:0051179 localization	-2.5	6.5	4.4	20836	49	260	4	1.5	0.76	20614|23859|26414|70546	Snap25|Dlg2|Mapk10|Zdhhc2	-0.48	MyList
GO Biological Processes	19	GO:0040011	locomotion	19_GO:0040011 locomotion	-2.5	2.2	3.3	20836	538	260	15	5.8	1.4	11735|12064|12778|12978|14178|16392|17329|18211|18590|19242|20750|66102|66793|68545|105855	Ank3|Bdnf|Ackr3|Csf1r|Fgf7|Isl1|Cxcl9|Ntrk1|Pdgfa|Ptn|Spp1|Cxcl16|Efcab1|Ecscr|Nckap1l	-0.48	MyList
GO Biological Processes	19	GO:0031623	receptor internalization	19_GO:0051179 localization	-2.5	5	4	20836	80	260	5	1.9	0.85	12389|12491|12778|20614|81905	Cav1|Cd36|Ackr3|Snap25|Cacng8	-0.48	MyList
KEGG Pathway	24	mmu04020	Calcium signaling pathway - Mus musculus (house mouse)		-2.5	3	3.5	20836	240	260	9	3.5	1.1	11548|14178|15235|18125|18211|18439|18573|18590|21390	Adra1b|Fgf7|Mst1|Nos1|Ntrk1|P2rx7|Pde1a|Pdgfa|Tbxa2r	-0.48	MyList
GO Biological Processes	19	GO:1903557	positive regulation of tumor necrosis factor superfamily cytokine production	19_GO:0048518 positive regulation of biological process	-2.5	4.1	3.8	20836	116	260	6	2.3	0.93	12491|12978|16392|83397|83430|214855	Cd36|Csf1r|Isl1|Akap12|Il23a|Arid5a	-0.47	MyList
GO Biological Processes	19	GO:0002429	immune response-activating cell surface receptor signaling pathway	19_GO:0002376 immune system process	-2.5	3.3	3.6	20836	197	260	8	3.1	1.1	14756|15170|16818|17195|20186|23880|105855|246177	Gpld1|Ptpn6|Lck|Mbl2|Nr1h4|Fyb|Nckap1l|Myo1g	-0.47	MyList
Reactome Gene Sets	6	R-MMU-9013404	RAC2 GTPase cycle		-2.5	4.9	4	20836	81	260	5	1.9	0.85	12389|23853|52331|105855|210293	Cav1|Def6|Stbd1|Nckap1l|Dock10	-0.47	MyList
GO Biological Processes	19	GO:0014068	positive regulation of phosphatidylinositol 3-kinase signaling	19_GO:0023052 signaling	-2.5	4.9	4	20836	81	260	5	1.9	0.85	15163|15170|18198|18211|18590	Hcls1|Ptpn6|Musk|Ntrk1|Pdgfa	-0.47	MyList
GO Biological Processes	19	GO:0017156	calcium-ion regulated exocytosis	19_GO:0051179 localization	-2.5	6.4	4.3	20836	50	260	4	1.5	0.76	20614|20979|56508|70450	Snap25|Syt1|Rapgef4|Unc13d	-0.47	MyList
GO Biological Processes	19	GO:0051493	regulation of cytoskeleton organization	19_GO:0050789 regulation of biological process	-2.5	2.2	3.2	20836	542	260	15	5.8	1.4	11519|11857|12389|12978|13835|14219|15163|18439|19736|22349|58522|77569|105855|107351|193740	Add2|Arhgdib|Cav1|Csf1r|Epha1|Ccn2|Hcls1|P2rx7|Rgs4|Vil1|Trim54|Limch1|Nckap1l|Kank1|Hspa1a	-0.47	MyList
GO Biological Processes	19	GO:0006816	calcium ion transport	19_GO:0051179 localization	-2.4	3	3.5	20836	243	260	9	3.5	1.1	12389|14219|16534|16818|18125|18439|69047|81905|171395	Cav1|Ccn2|Kcnn4|Lck|Nos1|P2rx7|Atp2c2|Cacng8|Pkd1l1	-0.46	MyList
GO Biological Processes	19	GO:0030183	B cell differentiation	19_GO:0002376 immune system process	-2.4	3.6	3.6	20836	157	260	7	2.7	1	12051|16186|16205|17305|18211|24099|210293	Bcl3|Il2rg|Gimap1|Mfng|Ntrk1|Tnfsf13b|Dock10	-0.46	MyList
KEGG Pathway	24	mmu04390	Hippo signaling pathway - Mus musculus (house mouse)		-2.4	3.6	3.6	20836	157	260	7	2.7	1	11576|11839|12160|12444|14219|22409|23859	Afp|Areg|Bmp5|Ccnd2|Ccn2|Wnt10a|Dlg2	-0.46	MyList
GO Biological Processes	19	GO:0030098	lymphocyte differentiation	19_GO:0002376 immune system process	-2.4	2.6	3.3	20836	339	260	11	4.2	1.2	12051|15284|16186|16205|16818|17305|18030|18211|24099|53314|210293	Bcl3|Hlx|Il2rg|Gimap1|Lck|Mfng|Nfil3|Ntrk1|Tnfsf13b|Batf|Dock10	-0.45	MyList
GO Biological Processes	19	GO:1903532	positive regulation of secretion by cell	19_GO:0051179 localization	-2.4	2.5	3.3	20836	389	260	12	4.6	1.3	14461|14756|16392|16534|18439|20186|20614|20750|20979|56508|70450|101772	Gata2|Gpld1|Isl1|Kcnn4|P2rx7|Nr1h4|Snap25|Spp1|Syt1|Rapgef4|Unc13d|Ano1	-0.45	MyList
GO Biological Processes	19	GO:0034204	lipid translocation	19_GO:0051179 localization	-2.4	6.3	4.2	20836	51	260	4	1.5	0.76	11981|16534|18439|241633	Atp9a|Kcnn4|P2rx7|Atp8b4	-0.45	MyList
Reactome Gene Sets	6	R-MMU-76002	Platelet activation, signaling and aggregation		-2.4	2.9	3.4	20836	245	260	9	3.5	1.1	12491|14710|15170|16818|18590|21346|21390|22041|56508	Cd36|Gngt2|Ptpn6|Lck|Pdgfa|Tagln2|Tbxa2r|Trf|Rapgef4	-0.45	MyList
GO Biological Processes	19	GO:0002253	activation of immune response	19_GO:0002376 immune system process	-2.4	2.6	3.3	20836	340	260	11	4.2	1.2	12362|14756|15139|15170|16818|17195|20186|23880|105855|246177|623121	Casp1|Gpld1|Hc|Ptpn6|Lck|Mbl2|Nr1h4|Fyb|Nckap1l|Myo1g|Ifi213	-0.45	MyList
GO Biological Processes	19	GO:0048872	homeostasis of number of cells	19_GO:0042592 homeostatic process	-2.4	2.6	3.3	20836	340	260	11	4.2	1.2	12977|12978|14461|15139|15163|18439|19824|24099|105855|210293|224792	Csf1|Csf1r|Gata2|Hc|Hcls1|P2rx7|Trim10|Tnfsf13b|Nckap1l|Dock10|Adgrf5	-0.45	MyList
GO Biological Processes	19	GO:0046634	regulation of alpha-beta T cell activation	19_GO:0002376 immune system process	-2.4	4	3.7	20836	119	260	6	2.3	0.93	15284|16186|54698|83430|105855|320484	Hlx|Il2rg|Crtam|Il23a|Nckap1l|Rasal3	-0.45	MyList
GO Biological Processes	19	GO:0050921	positive regulation of chemotaxis	19_GO:0040011 locomotion	-2.4	3.5	3.6	20836	159	260	7	2.7	1	12977|12978|19242|27226|83430|105855|106512	Csf1|Csf1r|Ptn|Pla2g7|Il23a|Nckap1l|Gpsm3	-0.44	MyList
GO Biological Processes	19	GO:0051924	regulation of calcium ion transport	19_GO:0051179 localization	-2.4	2.7	3.4	20836	294	260	10	3.8	1.2	12389|15170|15444|17329|18125|18439|19736|29867|56437|69047	Cav1|Ptpn6|Hpca|Cxcl9|Nos1|P2rx7|Rgs4|Cabp1|Rrad|Atp2c2	-0.44	MyList
GO Biological Processes	19	GO:0046638	positive regulation of alpha-beta T cell differentiation	19_GO:0002376 immune system process	-2.4	6.2	4.2	20836	52	260	4	1.5	0.76	15284|16186|83430|105855	Hlx|Il2rg|Il23a|Nckap1l	-0.44	MyList
GO Biological Processes	19	GO:0051222	positive regulation of protein transport	19_GO:0051179 localization	-2.4	2.6	3.3	20836	343	260	11	4.2	1.2	11735|14756|15163|15444|16392|16534|18439|20186|56508|70546|101772	Ank3|Gpld1|Hcls1|Hpca|Isl1|Kcnn4|P2rx7|Nr1h4|Rapgef4|Zdhhc2|Ano1	-0.43	MyList
GO Biological Processes	19	GO:0051147	regulation of muscle cell differentiation	19_GO:0032502 developmental process	-2.4	3.5	3.6	20836	161	260	7	2.7	1	11474|12064|12444|12978|19736|74318|227721	Actn3|Bdnf|Ccnd2|Csf1r|Rgs4|Hopx|Plpp7	-0.42	MyList
GO Biological Processes	19	GO:0043370	regulation of CD4-positive, alpha-beta T cell differentiation	19_GO:0002376 immune system process	-2.4	6	4.1	20836	53	260	4	1.5	0.76	15284|16186|83430|105855	Hlx|Il2rg|Il23a|Nckap1l	-0.41	MyList
GO Biological Processes	19	GO:0007613	memory	19_GO:0032501 multicellular organismal process	-2.4	3.5	3.5	20836	162	260	7	2.7	1	12064|12362|12444|18198|19242|20614|51791	Bdnf|Casp1|Ccnd2|Musk|Ptn|Snap25|Rgs14	-0.41	MyList
GO Biological Processes	19	GO:1905475	regulation of protein localization to membrane	19_GO:0051179 localization	-2.4	3.1	3.4	20836	205	260	8	3.1	1.1	11735|15444|18198|19242|22349|56508|66610|70546	Ank3|Hpca|Musk|Ptn|Vil1|Rapgef4|Abi3|Zdhhc2	-0.41	MyList
GO Biological Processes	19	GO:0032103	positive regulation of response to external stimulus	19_GO:0048518 positive regulation of biological process	-2.4	2.2	3.1	20836	555	260	15	5.8	1.4	12362|12389|12977|12978|17195|19242|20186|27226|54698|77777|83430|105855|106512|380713|623121	Casp1|Cav1|Csf1|Csf1r|Mbl2|Ptn|Nr1h4|Pla2g7|Crtam|Ulbp1|Il23a|Nckap1l|Gpsm3|Scarf1|Ifi213	-0.41	MyList
Reactome Gene Sets	6	R-MMU-9013423	RAC3 GTPase cycle		-2.4	4.7	3.8	20836	86	260	5	1.9	0.85	11857|12389|52331|105855|210293	Arhgdib|Cav1|Stbd1|Nckap1l|Dock10	-0.4	MyList
Reactome Gene Sets	6	R-MMU-201451	Signaling by BMP		-2.3	8.9	4.6	20836	27	260	3	1.2	0.66	11482|83453|110542	Acvrl1|Chrdl1|Amhr2	-0.4	MyList
GO Biological Processes	19	GO:0043113	receptor clustering	19_GO:0051179 localization	-2.3	5.9	4.1	20836	54	260	4	1.5	0.76	18198|19242|23859|83453	Musk|Ptn|Dlg2|Chrdl1	-0.4	MyList
GO Biological Processes	19	GO:0045124	regulation of bone resorption	19_GO:0042592 homeostatic process	-2.3	5.9	4.1	20836	54	260	4	1.5	0.76	12978|18439|20750|22041	Csf1r|P2rx7|Spp1|Trf	-0.4	MyList
GO Biological Processes	19	GO:0070201	regulation of establishment of protein localization	19_GO:0051179 localization	-2.3	2.1	3.1	20836	615	260	16	6.2	1.5	11735|12491|14756|15163|15444|16392|16534|18125|18439|20186|20614|29867|56508|70546|101772|218461	Ank3|Cd36|Gpld1|Hcls1|Hpca|Isl1|Kcnn4|Nos1|P2rx7|Nr1h4|Snap25|Cabp1|Rapgef4|Zdhhc2|Ano1|Pde8b	-0.39	MyList
GO Biological Processes	19	GO:0051047	positive regulation of secretion	19_GO:0051179 localization	-2.3	2.3	3.1	20836	453	260	13	5	1.4	14461|14756|16392|16534|18439|18779|20186|20614|20750|20979|56508|70450|101772	Gata2|Gpld1|Isl1|Kcnn4|P2rx7|Pla2r1|Nr1h4|Snap25|Spp1|Syt1|Rapgef4|Unc13d|Ano1	-0.39	MyList
GO Biological Processes	19	GO:0002573	myeloid leukocyte differentiation	19_GO:0032502 developmental process	-2.3	3.4	3.5	20836	165	260	7	2.7	1	12977|12978|14461|22041|53314|74481|623121	Csf1|Csf1r|Gata2|Trf|Batf|Batf2|Ifi213	-0.39	MyList
GO Biological Processes	19	GO:0048871	multicellular organismal homeostasis	19_GO:0042592 homeostatic process	-2.3	2	3	20836	673	260	17	6.5	1.5	12491|12977|12978|13038|14178|14219|14461|15139|15163|17195|18260|18439|19824|24099|105855|210293|224792	Cd36|Csf1|Csf1r|Ctsk|Fgf7|Ccn2|Gata2|Hc|Hcls1|Mbl2|Ocln|P2rx7|Trim10|Tnfsf13b|Nckap1l|Dock10|Adgrf5	-0.38	MyList
GO Biological Processes	19	GO:0060627	regulation of vesicle-mediated transport	19_GO:0051179 localization	-2.3	2.1	3.1	20836	617	260	16	6.2	1.5	11735|11981|12389|12491|14461|15444|16186|17195|18439|20979|22041|26875|56508|70450|70546|105855	Ank3|Atp9a|Cav1|Cd36|Gata2|Hpca|Il2rg|Mbl2|P2rx7|Syt1|Trf|Pclo|Rapgef4|Unc13d|Zdhhc2|Nckap1l	-0.38	MyList
GO Biological Processes	19	GO:0022612	gland morphogenesis	19_GO:0032502 developmental process	-2.3	3.8	3.6	20836	125	260	6	2.3	0.93	11839|12389|12977|13710|14178|15235	Areg|Cav1|Csf1|Elf3|Fgf7|Mst1	-0.38	MyList
GO Biological Processes	19	GO:0045933	positive regulation of muscle contraction	19_GO:0048518 positive regulation of biological process	-2.3	5.8	4	20836	55	260	4	1.5	0.76	11474|14219|16818|21390	Actn3|Ccn2|Lck|Tbxa2r	-0.38	MyList
KEGG Pathway	24	mmu05235	PD-L1 expression and PD-1 checkpoint pathway in cancer - Mus musculus (house mouse)		-2.3	4.6	3.8	20836	88	260	5	1.9	0.85	15170|16818|18037|53314|74481	Ptpn6|Lck|Nfkbie|Batf|Batf2	-0.38	MyList
GO Biological Processes	19	GO:0002768	immune response-regulating cell surface receptor signaling pathway	19_GO:0002376 immune system process	-2.3	3.1	3.4	20836	210	260	8	3.1	1.1	14756|15170|16818|17195|20186|23880|105855|246177	Gpld1|Ptpn6|Lck|Mbl2|Nr1h4|Fyb|Nckap1l|Myo1g	-0.38	MyList
GO Biological Processes	19	GO:0002262	myeloid cell homeostasis	19_GO:0042592 homeostatic process	-2.3	3.4	3.4	20836	167	260	7	2.7	1	12977|12978|15139|15163|19824|105855|224792	Csf1|Csf1r|Hc|Hcls1|Trim10|Nckap1l|Adgrf5	-0.37	MyList
GO Biological Processes	19	GO:1902107	positive regulation of leukocyte differentiation	19_GO:0002376 immune system process	-2.3	3	3.3	20836	211	260	8	3.1	1.1	12977|12978|15163|15284|16186|16818|83430|105855	Csf1|Csf1r|Hcls1|Hlx|Il2rg|Lck|Il23a|Nckap1l	-0.37	MyList
GO Biological Processes	19	GO:1903708	positive regulation of hemopoiesis	19_GO:0002376 immune system process	-2.3	3	3.3	20836	211	260	8	3.1	1.1	12977|12978|15163|15284|16186|16818|83430|105855	Csf1|Csf1r|Hcls1|Hlx|Il2rg|Lck|Il23a|Nckap1l	-0.37	MyList
GO Biological Processes	19	GO:0002757	immune response-activating signaling pathway	19_GO:0002376 immune system process	-2.3	2.8	3.3	20836	257	260	9	3.5	1.1	12362|14756|15170|16818|17195|20186|23880|105855|246177	Casp1|Gpld1|Ptpn6|Lck|Mbl2|Nr1h4|Fyb|Nckap1l|Myo1g	-0.37	MyList
GO Biological Processes	19	GO:0046632	alpha-beta T cell differentiation	19_GO:0002376 immune system process	-2.3	4.5	3.7	20836	89	260	5	1.9	0.85	12051|15284|16186|16205|53314	Bcl3|Hlx|Il2rg|Gimap1|Batf	-0.37	MyList
GO Biological Processes	19	GO:0046580	negative regulation of Ras protein signal transduction	19_GO:0023052 signaling	-2.3	5.7	4	20836	56	260	4	1.5	0.76	11548|107351|231532|320484	Adra1b|Kank1|Arhgap24|Rasal3	-0.37	MyList
GO Biological Processes	19	GO:1901890	positive regulation of cell junction assembly	19_GO:0048518 positive regulation of biological process	-2.3	3.8	3.5	20836	127	260	6	2.3	0.93	12064|12389|18198|18211|74318|232370	Bdnf|Cav1|Musk|Ntrk1|Hopx|Clstn3	-0.37	MyList
GO Biological Processes	19	GO:0010038	response to metal ion	19_GO:0050896 response to stimulus	-2.3	2.6	3.2	20836	306	260	10	3.8	1.2	11735|12389|14756|15444|16818|18439|20979|22041|23859|74096	Ank3|Cav1|Gpld1|Hpca|Lck|P2rx7|Syt1|Trf|Dlg2|Hvcn1	-0.37	MyList
GO Biological Processes	19	GO:1901380	negative regulation of potassium ion transmembrane transport	19_GO:0051179 localization	-2.3	8.3	4.4	20836	29	260	3	1.2	0.66	11735|12389|19736	Ank3|Cav1|Rgs4	-0.36	MyList
GO Biological Processes	19	GO:0032740	positive regulation of interleukin-17 production	19_GO:0048518 positive regulation of biological process	-2.3	8.3	4.4	20836	29	260	3	1.2	0.66	20186|83430|214855	Nr1h4|Il23a|Arid5a	-0.36	MyList
GO Biological Processes	19	GO:1900027	regulation of ruffle assembly	19_GO:0050789 regulation of biological process	-2.3	8.3	4.4	20836	29	260	3	1.2	0.66	12389|107351|231532	Cav1|Kank1|Arhgap24	-0.36	MyList
GO Biological Processes	19	GO:0010959	regulation of metal ion transport	19_GO:0051179 localization	-2.3	2.3	3.1	20836	462	260	13	5	1.4	11735|12389|15170|15444|17329|18125|18301|18439|19736|22041|29867|56437|69047	Ank3|Cav1|Ptpn6|Hpca|Cxcl9|Nos1|Fxyd5|P2rx7|Rgs4|Trf|Cabp1|Rrad|Atp2c2	-0.36	MyList
GO Biological Processes	19	GO:0070169	positive regulation of biomineral tissue development	19_GO:0032502 developmental process	-2.3	5.6	3.9	20836	57	260	4	1.5	0.76	11474|12978|18439|19242	Actn3|Csf1r|P2rx7|Ptn	-0.36	MyList
GO Biological Processes	19	GO:0002687	positive regulation of leukocyte migration	19_GO:0040011 locomotion	-2.3	3.3	3.4	20836	170	260	7	2.7	1	12977|12978|19242|27226|83430|105855|106512	Csf1|Csf1r|Ptn|Pla2g7|Il23a|Nckap1l|Gpsm3	-0.36	MyList
Reactome Gene Sets	6	R-MMU-194315	Signaling by Rho GTPases		-2.3	2.1	3	20836	571	260	15	5.8	1.4	11857|12389|16818|23853|52331|53972|70598|83397|105855|110596|210293|219140|231532|236920|259302	Arhgdib|Cav1|Lck|Def6|Stbd1|Ngef|Filip1|Akap12|Nckap1l|Arhgef28|Dock10|Spata13|Arhgap24|Stard8|Srgap3	-0.36	MyList
GO Biological Processes	19	GO:1904951	positive regulation of establishment of protein localization	19_GO:0051179 localization	-2.2	2.5	3.1	20836	359	260	11	4.2	1.2	11735|14756|15163|15444|16392|16534|18439|20186|56508|70546|101772	Ank3|Gpld1|Hcls1|Hpca|Isl1|Kcnn4|P2rx7|Nr1h4|Rapgef4|Zdhhc2|Ano1	-0.36	MyList
GO Biological Processes	19	GO:0071363	cellular response to growth factor stimulus	19_GO:0050896 response to stimulus	-2.2	2.2	3	20836	465	260	13	5	1.4	11482|12064|12389|14178|14219|18125|18211|22349|83453|107321|110542|239337|268977	Acvrl1|Bdnf|Cav1|Fgf7|Ccn2|Nos1|Ntrk1|Vil1|Chrdl1|Lpxn|Amhr2|Adamts12|Ltbp1	-0.34	MyList
GO Biological Processes	19	GO:0032963	collagen metabolic process	19_GO:0008152 metabolic process	-2.2	5.5	3.9	20836	58	260	4	1.5	0.76	13038|17388|18439|118453	Ctsk|Mmp15|P2rx7|Mmp28	-0.34	MyList
GO Biological Processes	19	GO:0030857	negative regulation of epithelial cell differentiation	19_GO:0048519 negative regulation of biological process	-2.2	5.5	3.9	20836	58	260	4	1.5	0.76	11482|12389|12978|74561	Acvrl1|Cav1|Csf1r|Nkx6-3	-0.34	MyList
GO Biological Processes	19	GO:0032956	regulation of actin cytoskeleton organization	19_GO:0050789 regulation of biological process	-2.2	2.4	3.1	20836	362	260	11	4.2	1.2	11519|11857|12978|13835|14219|15163|19736|22349|77569|105855|107351	Add2|Arhgdib|Csf1r|Epha1|Ccn2|Hcls1|Rgs4|Vil1|Limch1|Nckap1l|Kank1	-0.34	MyList
GO Biological Processes	19	GO:0008285	negative regulation of cell population proliferation	19_GO:0048519 negative regulation of biological process	-2.2	1.9	2.9	20836	746	260	18	6.9	1.6	11482|12064|12160|12389|12778|12978|14461|14756|15170|16392|18125|18211|19242|54139|54200|54698|68713|236749	Acvrl1|Bdnf|Bmp5|Cav1|Ackr3|Csf1r|Gata2|Gpld1|Ptpn6|Isl1|Nos1|Ntrk1|Ptn|Irf6|Sult2b1|Crtam|Ifitm1|Tesl1	-0.34	MyList
GO Biological Processes	19	GO:0042267	natural killer cell mediated cytotoxicity	19_GO:0044419 biological process involved in interspecies interaction between organisms	-2.2	8	4.3	20836	30	260	3	1.2	0.66	15170|70450|77777	Ptpn6|Unc13d|Ulbp1	-0.34	MyList
GO Biological Processes	19	GO:0043129	surfactant homeostasis	19_GO:0042592 homeostatic process	-2.2	8	4.3	20836	30	260	3	1.2	0.66	14178|17195|224792	Fgf7|Mbl2|Adgrf5	-0.34	MyList
GO Biological Processes	19	GO:0060907	positive regulation of macrophage cytokine production	19_GO:0002376 immune system process	-2.2	8	4.3	20836	30	260	3	1.2	0.66	12362|12491|18439	Casp1|Cd36|P2rx7	-0.34	MyList
GO Biological Processes	19	GO:0002313	mature B cell differentiation involved in immune response	19_GO:0002376 immune system process	-2.2	8	4.3	20836	30	260	3	1.2	0.66	12051|17305|210293	Bcl3|Mfng|Dock10	-0.34	MyList
GO Biological Processes	19	GO:0050890	cognition	19_GO:0032501 multicellular organismal process	-2.2	2.4	3.1	20836	364	260	11	4.2	1.2	11548|12064|12362|12444|18198|18211|19242|20614|51791|218461|260297	Adra1b|Bdnf|Casp1|Ccnd2|Musk|Ntrk1|Ptn|Snap25|Rgs14|Pde8b|Prrt1	-0.33	MyList
GO Biological Processes	19	GO:0097035	regulation of membrane lipid distribution	19_GO:0065007 biological regulation	-2.2	5.4	3.8	20836	59	260	4	1.5	0.76	11981|16534|18439|241633	Atp9a|Kcnn4|P2rx7|Atp8b4	-0.33	MyList
GO Biological Processes	19	GO:0051055	negative regulation of lipid biosynthetic process	19_GO:0048519 negative regulation of biological process	-2.2	5.4	3.8	20836	59	260	4	1.5	0.76	12160|18590|20186|218461	Bmp5|Pdgfa|Nr1h4|Pde8b	-0.33	MyList
GO Biological Processes	19	GO:0002697	regulation of immune effector process	19_GO:0002376 immune system process	-2.2	2.2	3	20836	471	260	13	5	1.4	12362|12491|14461|15170|15284|17195|18439|54698|70450|77777|83430|105855|214855	Casp1|Cd36|Gata2|Ptpn6|Hlx|Mbl2|P2rx7|Crtam|Unc13d|Ulbp1|Il23a|Nckap1l|Arid5a	-0.32	MyList
GO Biological Processes	19	GO:0071248	cellular response to metal ion	19_GO:0050896 response to stimulus	-2.2	3.2	3.3	20836	175	260	7	2.7	1	11735|14756|15444|20979|22041|23859|74096	Ank3|Gpld1|Hpca|Syt1|Trf|Dlg2|Hvcn1	-0.32	MyList
GO Biological Processes	19	GO:0099637	neurotransmitter receptor transport	19_GO:0051179 localization	-2.2	7.8	4.2	20836	31	260	3	1.2	0.66	20614|26414|81905	Snap25|Mapk10|Cacng8	-0.32	MyList
GO Biological Processes	19	GO:0060037	pharyngeal system development	19_GO:0032502 developmental process	-2.2	7.8	4.2	20836	31	260	3	1.2	0.66	12160|16392|224792	Bmp5|Isl1|Adgrf5	-0.32	MyList
Reactome Gene Sets	6	R-MMU-9013407	RHOH GTPase cycle		-2.2	7.8	4.2	20836	31	260	3	1.2	0.66	11857|12389|16818	Arhgdib|Cav1|Lck	-0.32	MyList
GO Biological Processes	19	GO:0002026	regulation of the force of heart contraction	19_GO:0032501 multicellular organismal process	-2.2	7.8	4.2	20836	31	260	3	1.2	0.66	11548|12389|18125	Adra1b|Cav1|Nos1	-0.32	MyList
GO Biological Processes	19	GO:0033003	regulation of mast cell activation	19_GO:0002376 immune system process	-2.2	5.3	3.8	20836	60	260	4	1.5	0.76	14461|15170|70450|380732	Gata2|Ptpn6|Unc13d|Milr1	-0.32	MyList
WikiPathways	27	WP3632	Lung fibrosis		-2.2	5.3	3.8	20836	60	260	4	1.5	0.76	14178|14219|18590|20750	Fgf7|Ccn2|Pdgfa|Spp1	-0.32	MyList
Reactome Gene Sets	6	R-MMU-1650814	Collagen biosynthesis and modifying enzymes		-2.2	5.3	3.8	20836	60	260	4	1.5	0.76	12822|12826|12836|71355	Col18a1|Col4a1|Col7a1|Col24a1	-0.32	MyList
GO Biological Processes	19	GO:0071622	regulation of granulocyte chemotaxis	19_GO:0040011 locomotion	-2.2	5.3	3.8	20836	60	260	4	1.5	0.76	12977|12978|83430|105855	Csf1|Csf1r|Il23a|Nckap1l	-0.32	MyList
KEGG Pathway	24	mmu04061	Viral protein interaction with cytokine and cytokine receptor - Mus musculus (house mouse)		-2.2	4.2	3.5	20836	95	260	5	1.9	0.85	12778|12977|12978|16186|17329	Ackr3|Csf1|Csf1r|Il2rg|Cxcl9	-0.32	MyList
GO Biological Processes	19	GO:0050806	positive regulation of synaptic transmission	19_GO:0023052 signaling	-2.2	2.5	3.1	20836	318	260	10	3.8	1.2	18125|18198|18211|20614|20979|51791|70546|81905|232370|260297	Nos1|Musk|Ntrk1|Snap25|Syt1|Rgs14|Zdhhc2|Cacng8|Clstn3|Prrt1	-0.31	MyList
GO Biological Processes	19	GO:0045619	regulation of lymphocyte differentiation	19_GO:0002376 immune system process	-2.2	2.9	3.2	20836	222	260	8	3.1	1.1	15170|15284|16186|16818|54698|83430|105855|278672	Ptpn6|Hlx|Il2rg|Lck|Crtam|Il23a|Nckap1l|Duxbl1	-0.31	MyList
GO Biological Processes	19	GO:0051249	regulation of lymphocyte activation	19_GO:0002376 immune system process	-2.2	2.1	2.9	20836	530	260	14	5.4	1.4	12389|12978|15170|15284|16186|16818|24099|54698|77777|83430|105855|242248|278672|320484	Cav1|Csf1r|Ptpn6|Hlx|Il2rg|Lck|Tnfsf13b|Crtam|Ulbp1|Il23a|Nckap1l|Bank1|Duxbl1|Rasal3	-0.31	MyList
GO Biological Processes	19	GO:0002764	immune response-regulating signaling pathway	19_GO:0002376 immune system process	-2.2	2.7	3.1	20836	270	260	9	3.5	1.1	12362|14756|15170|16818|17195|20186|23880|105855|246177	Casp1|Gpld1|Ptpn6|Lck|Mbl2|Nr1h4|Fyb|Nckap1l|Myo1g	-0.31	MyList
GO Biological Processes	19	GO:0051223	regulation of protein transport	19_GO:0051179 localization	-2.2	2.1	2.9	20836	586	260	15	5.8	1.4	11735|12491|14756|15163|15444|16392|16534|18125|18439|20186|29867|56508|70546|101772|218461	Ank3|Cd36|Gpld1|Hcls1|Hpca|Isl1|Kcnn4|Nos1|P2rx7|Nr1h4|Cabp1|Rapgef4|Zdhhc2|Ano1|Pde8b	-0.31	MyList
Reactome Gene Sets	6	R-MMU-9716542	Signaling by Rho GTPases, Miro GTPases and RHOBTB3		-2.2	2.1	2.9	20836	586	260	15	5.8	1.4	11857|12389|16818|23853|52331|53972|70598|83397|105855|110596|210293|219140|231532|236920|259302	Arhgdib|Cav1|Lck|Def6|Stbd1|Ngef|Filip1|Akap12|Nckap1l|Arhgef28|Dock10|Spata13|Arhgap24|Stard8|Srgap3	-0.31	MyList
GO Biological Processes	19	GO:0035065	regulation of histone acetylation	19_GO:0008152 metabolic process	-2.1	5.3	3.7	20836	61	260	4	1.5	0.76	14461|16392|18125|214855	Gata2|Isl1|Nos1|Arid5a	-0.31	MyList
GO Biological Processes	19	GO:1904062	regulation of monoatomic cation transmembrane transport	19_GO:0051179 localization	-2.1	2.4	3	20836	371	260	11	4.2	1.2	11735|12389|15170|15444|17329|18125|18301|18439|19736|29867|56437	Ank3|Cav1|Ptpn6|Hpca|Cxcl9|Nos1|Fxyd5|P2rx7|Rgs4|Cabp1|Rrad	-0.31	MyList
GO Biological Processes	19	GO:1903530	regulation of secretion by cell	19_GO:0051179 localization	-2.1	1.9	2.9	20836	701	260	17	6.5	1.5	11981|14461|14756|16392|16534|18125|18439|20186|20614|20750|20979|26875|56508|70450|101772|105855|218461	Atp9a|Gata2|Gpld1|Isl1|Kcnn4|Nos1|P2rx7|Nr1h4|Snap25|Spp1|Syt1|Pclo|Rapgef4|Unc13d|Ano1|Nckap1l|Pde8b	-0.31	MyList
GO Biological Processes	19	GO:0002825	regulation of T-helper 1 type immune response	19_GO:0002376 immune system process	-2.1	7.5	4.1	20836	32	260	3	1.2	0.66	15284|83430|214855	Hlx|Il23a|Arid5a	-0.31	MyList
GO Biological Processes	19	GO:0033344	cholesterol efflux	19_GO:0051179 localization	-2.1	7.5	4.1	20836	32	260	3	1.2	0.66	12389|223920|381524	Cav1|Soat2|Mexis	-0.31	MyList
GO Biological Processes	19	GO:2000178	negative regulation of neural precursor cell proliferation	19_GO:0048519 negative regulation of biological process	-2.1	7.5	4.1	20836	32	260	3	1.2	0.66	12064|14461|19242	Bdnf|Gata2|Ptn	-0.31	MyList
GO Biological Processes	19	GO:0030041	actin filament polymerization	19_GO:0009987 cellular process	-2.1	7.5	4.1	20836	32	260	3	1.2	0.66	15163|19201|22349	Hcls1|Pstpip2|Vil1	-0.31	MyList
GO Biological Processes	19	GO:0050766	positive regulation of phagocytosis	19_GO:0051179 localization	-2.1	4.1	3.5	20836	97	260	5	1.9	0.85	12491|14461|16186|17195|105855	Cd36|Gata2|Il2rg|Mbl2|Nckap1l	-0.3	MyList
GO Biological Processes	19	GO:0002312	B cell activation involved in immune response	19_GO:0002376 immune system process	-2.1	5.2	3.7	20836	62	260	4	1.5	0.76	12051|17305|53314|210293	Bcl3|Mfng|Batf|Dock10	-0.3	MyList
GO Biological Processes	19	GO:0017157	regulation of exocytosis	19_GO:0051179 localization	-2.1	2.8	3.1	20836	226	260	8	3.1	1.1	11981|14461|18439|20979|26875|56508|70450|105855	Atp9a|Gata2|P2rx7|Syt1|Pclo|Rapgef4|Unc13d|Nckap1l	-0.29	MyList
GO Biological Processes	19	GO:0070848	response to growth factor	19_GO:0050896 response to stimulus	-2.1	2.2	2.9	20836	481	260	13	5	1.4	11482|12064|12389|14178|14219|18125|18211|22349|83453|107321|110542|239337|268977	Acvrl1|Bdnf|Cav1|Fgf7|Ccn2|Nos1|Ntrk1|Vil1|Chrdl1|Lpxn|Amhr2|Adamts12|Ltbp1	-0.29	MyList
Reactome Gene Sets	6	R-MMU-418594	G alpha (i) signalling events		-2.1	2.6	3.1	20836	274	260	9	3.5	1.1	12778|14710|15139|17329|18573|19736|51791|66102|106512	Ackr3|Gngt2|Hc|Cxcl9|Pde1a|Rgs4|Rgs14|Cxcl16|Gpsm3	-0.29	MyList
GO Biological Processes	19	GO:0045766	positive regulation of angiogenesis	19_GO:0032502 developmental process	-2.1	3.1	3.2	20836	181	260	7	2.7	1	11482|13835|14461|15139|16392|18211|21390	Acvrl1|Epha1|Gata2|Hc|Isl1|Ntrk1|Tbxa2r	-0.29	MyList
GO Biological Processes	19	GO:1904018	positive regulation of vasculature development	19_GO:0032502 developmental process	-2.1	3.1	3.2	20836	181	260	7	2.7	1	11482|13835|14461|15139|16392|18211|21390	Acvrl1|Epha1|Gata2|Hc|Isl1|Ntrk1|Tbxa2r	-0.29	MyList
GO Biological Processes	19	GO:0010942	positive regulation of cell death	19_GO:0048518 positive regulation of biological process	-2.1	1.9	2.8	20836	708	260	17	6.5	1.5	12362|12389|12491|12822|13038|14219|14756|15235|16818|18125|18198|18211|18439|18779|19242|68545|83397	Casp1|Cav1|Cd36|Col18a1|Ctsk|Ccn2|Gpld1|Mst1|Lck|Nos1|Musk|Ntrk1|P2rx7|Pla2r1|Ptn|Ecscr|Akap12	-0.29	MyList
GO Biological Processes	19	GO:0042110	T cell activation	19_GO:0002376 immune system process	-2.1	2.3	3	20836	376	260	11	4.2	1.2	12051|15170|15284|16186|16205|16818|18439|24099|53314|54698|83430	Bcl3|Ptpn6|Hlx|Il2rg|Gimap1|Lck|P2rx7|Tnfsf13b|Batf|Crtam|Il23a	-0.29	MyList
GO Biological Processes	19	GO:0051058	negative regulation of small GTPase mediated signal transduction	19_GO:0023052 signaling	-2.1	5.1	3.7	20836	63	260	4	1.5	0.76	11548|107351|231532|320484	Adra1b|Kank1|Arhgap24|Rasal3	-0.29	MyList
GO Biological Processes	19	GO:0050678	regulation of epithelial cell proliferation	19_GO:0050789 regulation of biological process	-2.1	2.2	2.9	20836	429	260	12	4.6	1.3	11482|12160|12389|12444|12822|14178|14461|15235|15284|16392|19242|54139	Acvrl1|Bmp5|Cav1|Ccnd2|Col18a1|Fgf7|Gata2|Mst1|Hlx|Isl1|Ptn|Irf6	-0.29	MyList
Reactome Gene Sets	6	R-MMU-1592389	Activation of Matrix Metalloproteinases		-2.1	7.3	4.1	20836	33	260	3	1.2	0.66	12822|13038|17388	Col18a1|Ctsk|Mmp15	-0.29	MyList
GO Biological Processes	19	GO:0048013	ephrin receptor signaling pathway	19_GO:0023052 signaling	-2.1	7.3	4.1	20836	33	260	3	1.2	0.66	13835|53972|77531	Epha1|Ngef|Anks1b	-0.29	MyList
GO Biological Processes	19	GO:0032941	secretion by tissue	19_GO:0051179 localization	-2.1	7.3	4.1	20836	33	260	3	1.2	0.66	16534|101772|232156	Kcnn4|Ano1|Slc4a5	-0.29	MyList
GO Biological Processes	19	GO:0002228	natural killer cell mediated immunity	19_GO:0044419 biological process involved in interspecies interaction between organisms	-2.1	7.3	4.1	20836	33	260	3	1.2	0.66	15170|70450|77777	Ptpn6|Unc13d|Ulbp1	-0.29	MyList
GO Biological Processes	19	GO:0014009	glial cell proliferation	19_GO:0032502 developmental process	-2.1	7.3	4.1	20836	33	260	3	1.2	0.66	11839|12977|12978	Areg|Csf1|Csf1r	-0.29	MyList
WikiPathways	27	WP2432	Spinal cord injury		-2.1	4	3.4	20836	99	260	5	1.9	0.85	12064|12826|15139|18125|24099	Bdnf|Col4a1|Hc|Nos1|Tnfsf13b	-0.29	MyList
GO Biological Processes	19	GO:0006954	inflammatory response	19_GO:0050896 response to stimulus	-2.1	2.1	2.9	20836	539	260	14	5.4	1.4	12362|12977|12978|13710|15139|17329|18439|19242|20186|21390|24058|27226|70450|83430	Casp1|Csf1|Csf1r|Elf3|Hc|Cxcl9|P2rx7|Ptn|Nr1h4|Tbxa2r|Sigirr|Pla2g7|Unc13d|Il23a	-0.29	MyList
GO Biological Processes	19	GO:0032940	secretion by cell	19_GO:0051179 localization	-2.1	2.2	2.9	20836	430	260	12	4.6	1.3	12064|14178|14219|18439|20614|20979|21990|26875|56508|70450|246177|380732	Bdnf|Fgf7|Ccn2|P2rx7|Snap25|Syt1|Tph1|Pclo|Rapgef4|Unc13d|Myo1g|Milr1	-0.29	MyList
GO Biological Processes	19	GO:0050866	negative regulation of cell activation	19_GO:0048519 negative regulation of biological process	-2.1	2.8	3.1	20836	229	260	8	3.1	1.1	15170|15284|18590|54698|105855|224792|242248|380732	Ptpn6|Hlx|Pdgfa|Crtam|Nckap1l|Adgrf5|Bank1|Milr1	-0.28	MyList
GO Biological Processes	19	GO:0046850	regulation of bone remodeling	19_GO:0032501 multicellular organismal process	-2.1	5	3.6	20836	64	260	4	1.5	0.76	12978|18439|20750|22041	Csf1r|P2rx7|Spp1|Trf	-0.28	MyList
GO Biological Processes	19	GO:0045778	positive regulation of ossification	19_GO:0048518 positive regulation of biological process	-2.1	5	3.6	20836	64	260	4	1.5	0.76	11474|12978|18439|19242	Actn3|Csf1r|P2rx7|Ptn	-0.28	MyList
GO Biological Processes	19	GO:0050854	regulation of antigen receptor-mediated signaling pathway	19_GO:0002376 immune system process	-2.1	5	3.6	20836	64	260	4	1.5	0.76	15170|16534|16818|107321	Ptpn6|Kcnn4|Lck|Lpxn	-0.28	MyList
GO Biological Processes	19	GO:0007416	synapse assembly	19_GO:0032502 developmental process	-2.1	4	3.4	20836	100	260	5	1.9	0.85	11519|12064|26875|70546|232370	Add2|Bdnf|Pclo|Zdhhc2|Clstn3	-0.28	MyList
Reactome Gene Sets	6	R-MMU-451927	Interleukin-2 family signaling		-2.1	7.1	4	20836	34	260	3	1.2	0.66	15170|16186|16818	Ptpn6|Il2rg|Lck	-0.27	MyList
GO Biological Processes	19	GO:0035066	positive regulation of histone acetylation	19_GO:0048518 positive regulation of biological process	-2.1	7.1	4	20836	34	260	3	1.2	0.66	16392|18125|214855	Isl1|Nos1|Arid5a	-0.27	MyList
GO Biological Processes	19	GO:0051216	cartilage development	19_GO:0032502 developmental process	-2.1	3	3.1	20836	185	260	7	2.7	1	12160|14219|14756|17182|18933|214855|239337	Bmp5|Ccn2|Gpld1|Matn3|Prrx1|Arid5a|Adamts12	-0.27	MyList
GO Biological Processes	19	GO:0009612	response to mechanical stimulus	19_GO:0050896 response to stimulus	-2.1	3	3.1	20836	185	260	7	2.7	1	12389|16818|18125|18211|18439|19242|171395	Cav1|Lck|Nos1|Ntrk1|P2rx7|Ptn|Pkd1l1	-0.27	MyList
GO Biological Processes	19	GO:0042391	regulation of membrane potential	19_GO:0065007 biological regulation	-2.1	2.1	2.8	20836	489	260	13	5	1.4	11735|12064|12362|12389|12491|16534|18125|18439|19242|19736|26875|56508|101772	Ank3|Bdnf|Casp1|Cav1|Cd36|Kcnn4|Nos1|P2rx7|Ptn|Rgs4|Pclo|Rapgef4|Ano1	-0.27	MyList
GO Biological Processes	19	GO:0022409	positive regulation of cell-cell adhesion	19_GO:0048518 positive regulation of biological process	-2.1	2.4	2.9	20836	330	260	10	3.8	1.2	11492|11735|12389|15284|16186|16818|24099|83430|105855|320484	Adam19|Ank3|Cav1|Hlx|Il2rg|Lck|Tnfsf13b|Il23a|Nckap1l|Rasal3	-0.27	MyList
GO Biological Processes	19	GO:0110053	regulation of actin filament organization	19_GO:0050789 regulation of biological process	-2.1	2.6	3	20836	280	260	9	3.5	1.1	11519|13835|14219|15163|19736|22349|77569|105855|107351	Add2|Epha1|Ccn2|Hcls1|Rgs4|Vil1|Limch1|Nckap1l|Kank1	-0.27	MyList
GO Biological Processes	19	GO:0001909	leukocyte mediated cytotoxicity	19_GO:0002376 immune system process	-2.1	4.9	3.6	20836	65	260	4	1.5	0.76	15170|18439|70450|77777	Ptpn6|P2rx7|Unc13d|Ulbp1	-0.27	MyList
GO Biological Processes	19	GO:0016079	synaptic vesicle exocytosis	19_GO:0051179 localization	-2.1	4.9	3.6	20836	65	260	4	1.5	0.76	18439|20614|20979|26875	P2rx7|Snap25|Syt1|Pclo	-0.27	MyList
GO Biological Processes	19	GO:0002822	regulation of adaptive immune response based on somatic recombination of immune receptors built from immunoglobulin superfamily domains	19_GO:0002376 immune system process	-2.1	2.8	3	20836	232	260	8	3.1	1.1	15170|15284|18439|24099|77777|83430|105855|214855	Ptpn6|Hlx|P2rx7|Tnfsf13b|Ulbp1|Il23a|Nckap1l|Arid5a	-0.27	MyList
GO Biological Processes	19	GO:0071466	cellular response to xenobiotic stimulus	19_GO:0050896 response to stimulus	-2	3	3.1	20836	186	260	7	2.7	1	12515|14756|18125|20186|27384|57344|622402	Cd69|Gpld1|Nos1|Nr1h4|Akr1c13|As3mt|Akr1c12	-0.27	MyList
GO Biological Processes	19	GO:0032651	regulation of interleukin-1 beta production	19_GO:0032501 multicellular organismal process	-2	3.9	3.3	20836	102	260	5	1.9	0.85	12362|12491|16392|18439|623121	Casp1|Cd36|Isl1|P2rx7|Ifi213	-0.27	MyList
GO Biological Processes	19	GO:0033674	positive regulation of kinase activity	19_GO:0048518 positive regulation of biological process	-2	2.2	2.9	20836	437	260	12	4.6	1.3	11839|12444|12977|12978|13835|18198|18211|18439|18590|66610|83430|320664	Areg|Ccnd2|Csf1|Csf1r|Epha1|Musk|Ntrk1|P2rx7|Pdgfa|Abi3|Il23a|Cass4	-0.27	MyList
GO Biological Processes	19	GO:0050863	regulation of T cell activation	19_GO:0002376 immune system process	-2	2.3	2.9	20836	384	260	11	4.2	1.2	12389|15170|15284|16186|16818|24099|54698|83430|105855|278672|320484	Cav1|Ptpn6|Hlx|Il2rg|Lck|Tnfsf13b|Crtam|Il23a|Nckap1l|Duxbl1|Rasal3	-0.27	MyList
GO Biological Processes	19	GO:0140352	export from cell	19_GO:0051179 localization	-2	2.1	2.8	20836	492	260	13	5	1.4	12064|14178|14219|16534|18439|20614|20979|21990|26875|56508|70450|246177|380732	Bdnf|Fgf7|Ccn2|Kcnn4|P2rx7|Snap25|Syt1|Tph1|Pclo|Rapgef4|Unc13d|Myo1g|Milr1	-0.27	MyList
GO Biological Processes	19	GO:0034765	regulation of monoatomic ion transmembrane transport	19_GO:0051179 localization	-2	2.1	2.8	20836	492	260	13	5	1.4	11735|12389|15170|15444|17329|18125|18301|18439|19736|29867|56437|74096|81905	Ank3|Cav1|Ptpn6|Hpca|Cxcl9|Nos1|Fxyd5|P2rx7|Rgs4|Cabp1|Rrad|Hvcn1|Cacng8	-0.27	MyList
GO Biological Processes	19	GO:0030278	regulation of ossification	19_GO:0032501 multicellular organismal process	-2	3.4	3.2	20836	143	260	6	2.3	0.93	11474|12977|12978|18439|19242|21990	Actn3|Csf1|Csf1r|P2rx7|Ptn|Tph1	-0.27	MyList
GO Biological Processes	19	GO:0031589	cell-substrate adhesion	19_GO:0009987 cellular process	-2	3	3.1	20836	187	260	7	2.7	1	11474|13835|14219|107321|192897|239337|246177	Actn3|Epha1|Ccn2|Lpxn|Itgb4|Adamts12|Myo1g	-0.27	MyList
Reactome Gene Sets	6	R-MMU-216083	Integrin cell surface interactions		-2	4.9	3.5	20836	66	260	4	1.5	0.76	12822|12826|12836|20750	Col18a1|Col4a1|Col7a1|Spp1	-0.26	MyList
GO Biological Processes	19	GO:0030574	collagen catabolic process	19_GO:0008152 metabolic process	-2	6.9	3.9	20836	35	260	3	1.2	0.66	13038|17388|118453	Ctsk|Mmp15|Mmp28	-0.26	MyList
Reactome Gene Sets	6	R-MMU-8948216	Collagen chain trimerization		-2	6.9	3.9	20836	35	260	3	1.2	0.66	12822|12836|71355	Col18a1|Col7a1|Col24a1	-0.26	MyList
GO Biological Processes	19	GO:0045580	regulation of T cell differentiation	19_GO:0002376 immune system process	-2	3	3.1	20836	188	260	7	2.7	1	15284|16186|16818|54698|83430|105855|278672	Hlx|Il2rg|Lck|Crtam|Il23a|Nckap1l|Duxbl1	-0.26	MyList
GO Biological Processes	19	GO:0070374	positive regulation of ERK1 and ERK2 cascade	19_GO:0023052 signaling	-2	2.7	3	20836	235	260	8	3.1	1.1	11475|12491|12778|12978|14219|18590|83397|109042	Acta2|Cd36|Ackr3|Csf1r|Ccn2|Pdgfa|Akap12|Cavin3	-0.26	MyList
GO Biological Processes	19	GO:0050714	positive regulation of protein secretion	19_GO:0051179 localization	-2	3	3.1	20836	189	260	7	2.7	1	14756|16392|16534|18439|20186|56508|101772	Gpld1|Isl1|Kcnn4|P2rx7|Nr1h4|Rapgef4|Ano1	-0.25	MyList
